# Supplementary material
Source: PubMed Central journal article supplement (PMC4014280)

Name: SACE\_7106  
ELTKEEPNRAATAYK  
ELTKEEPNRAAT[Pho]AYK

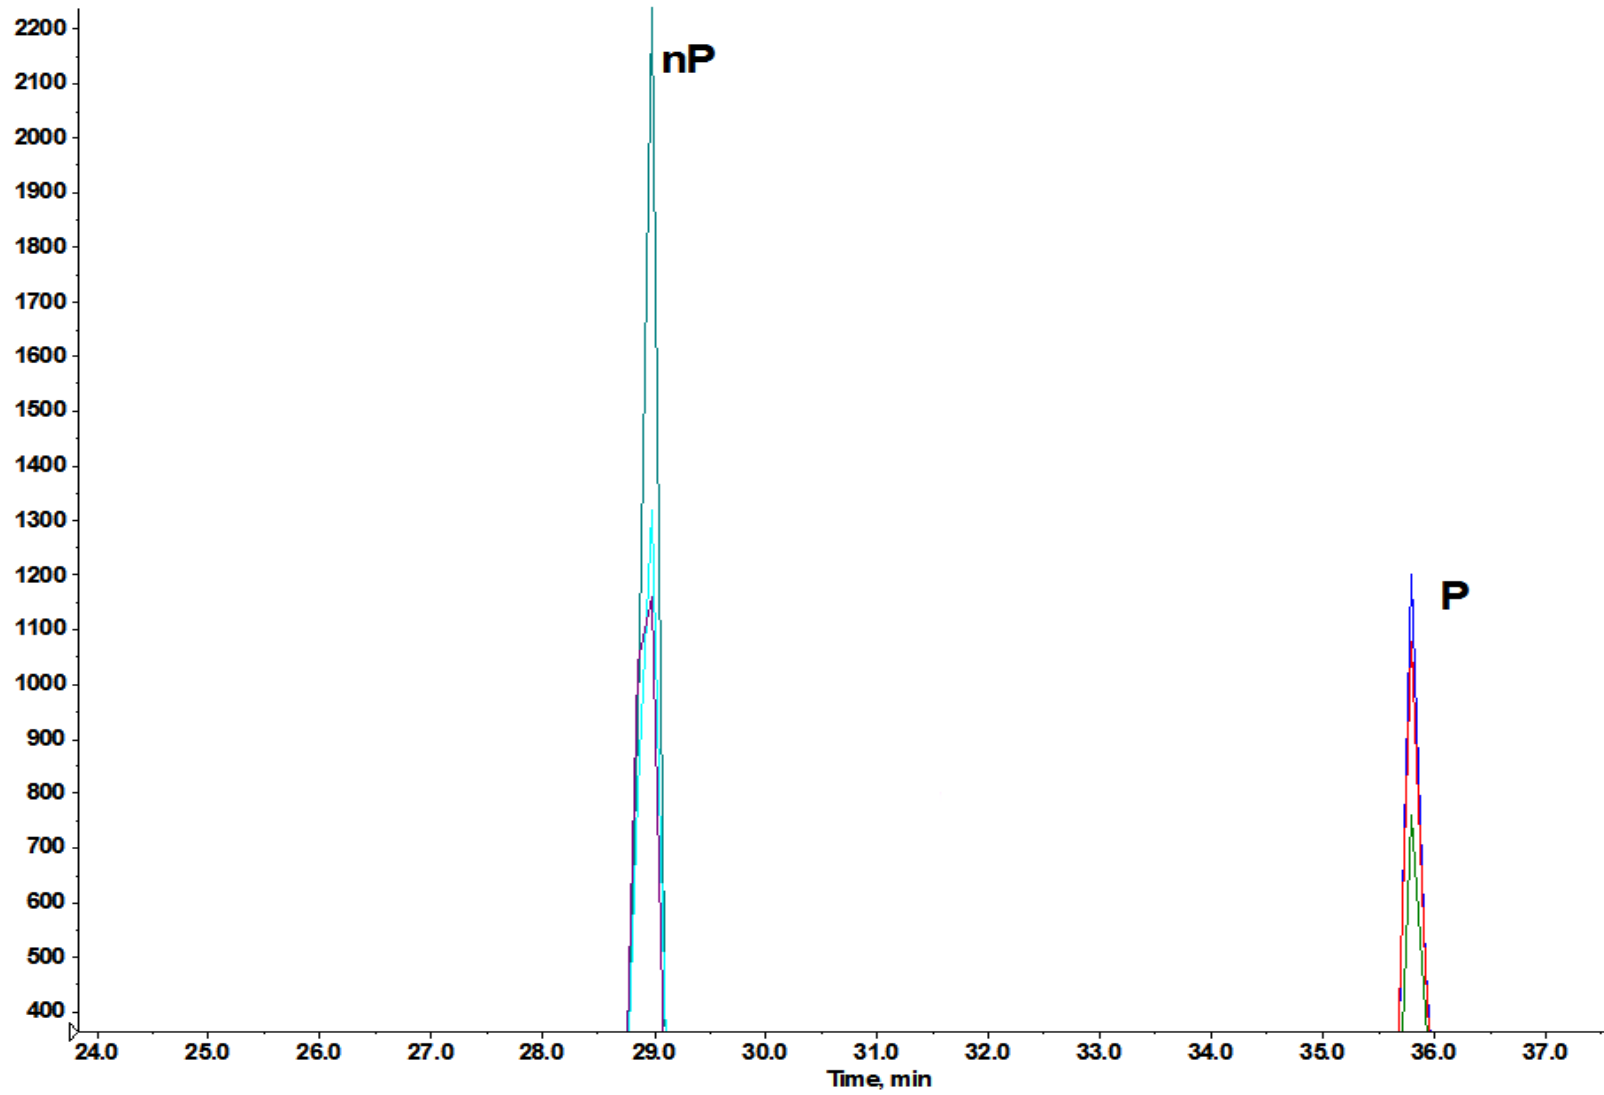

QVYGEAGLDTDK  
QVYGEAGLDT[Pho]DK

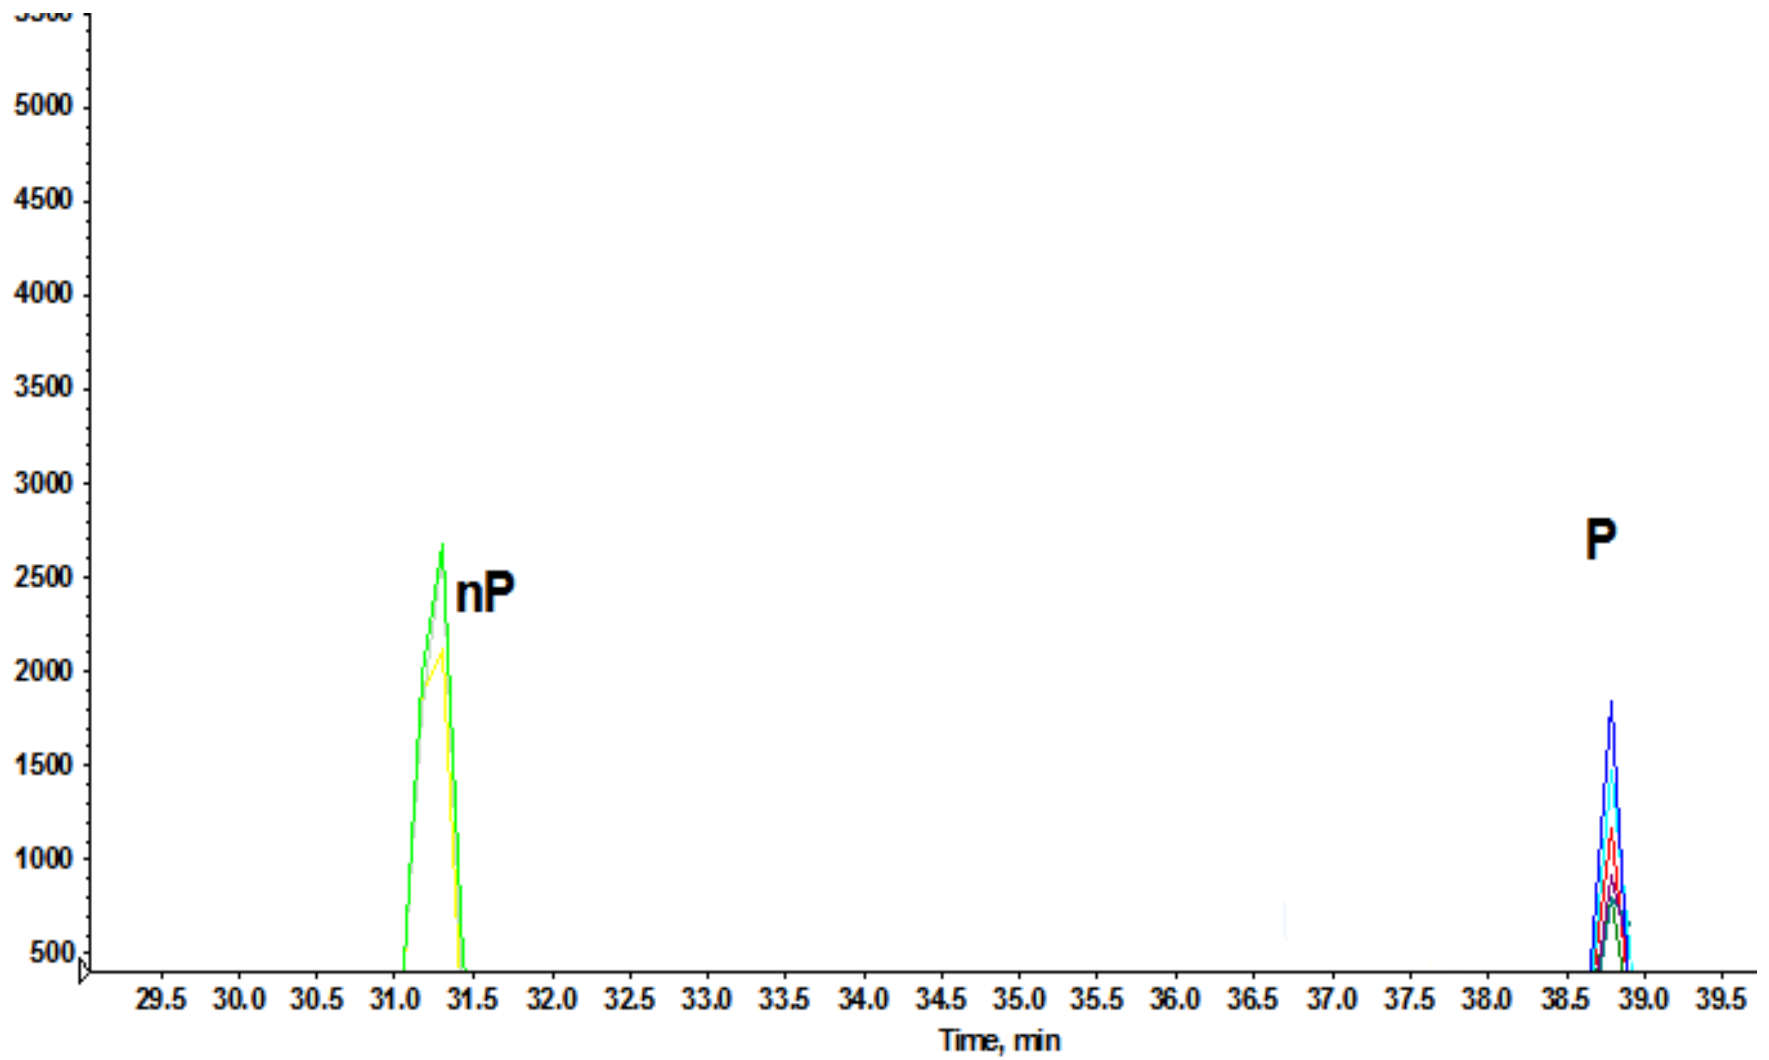

Name: SACE\_0414

EKEIERIMQVLSR

EKEIERIMQVLS[Pho]R

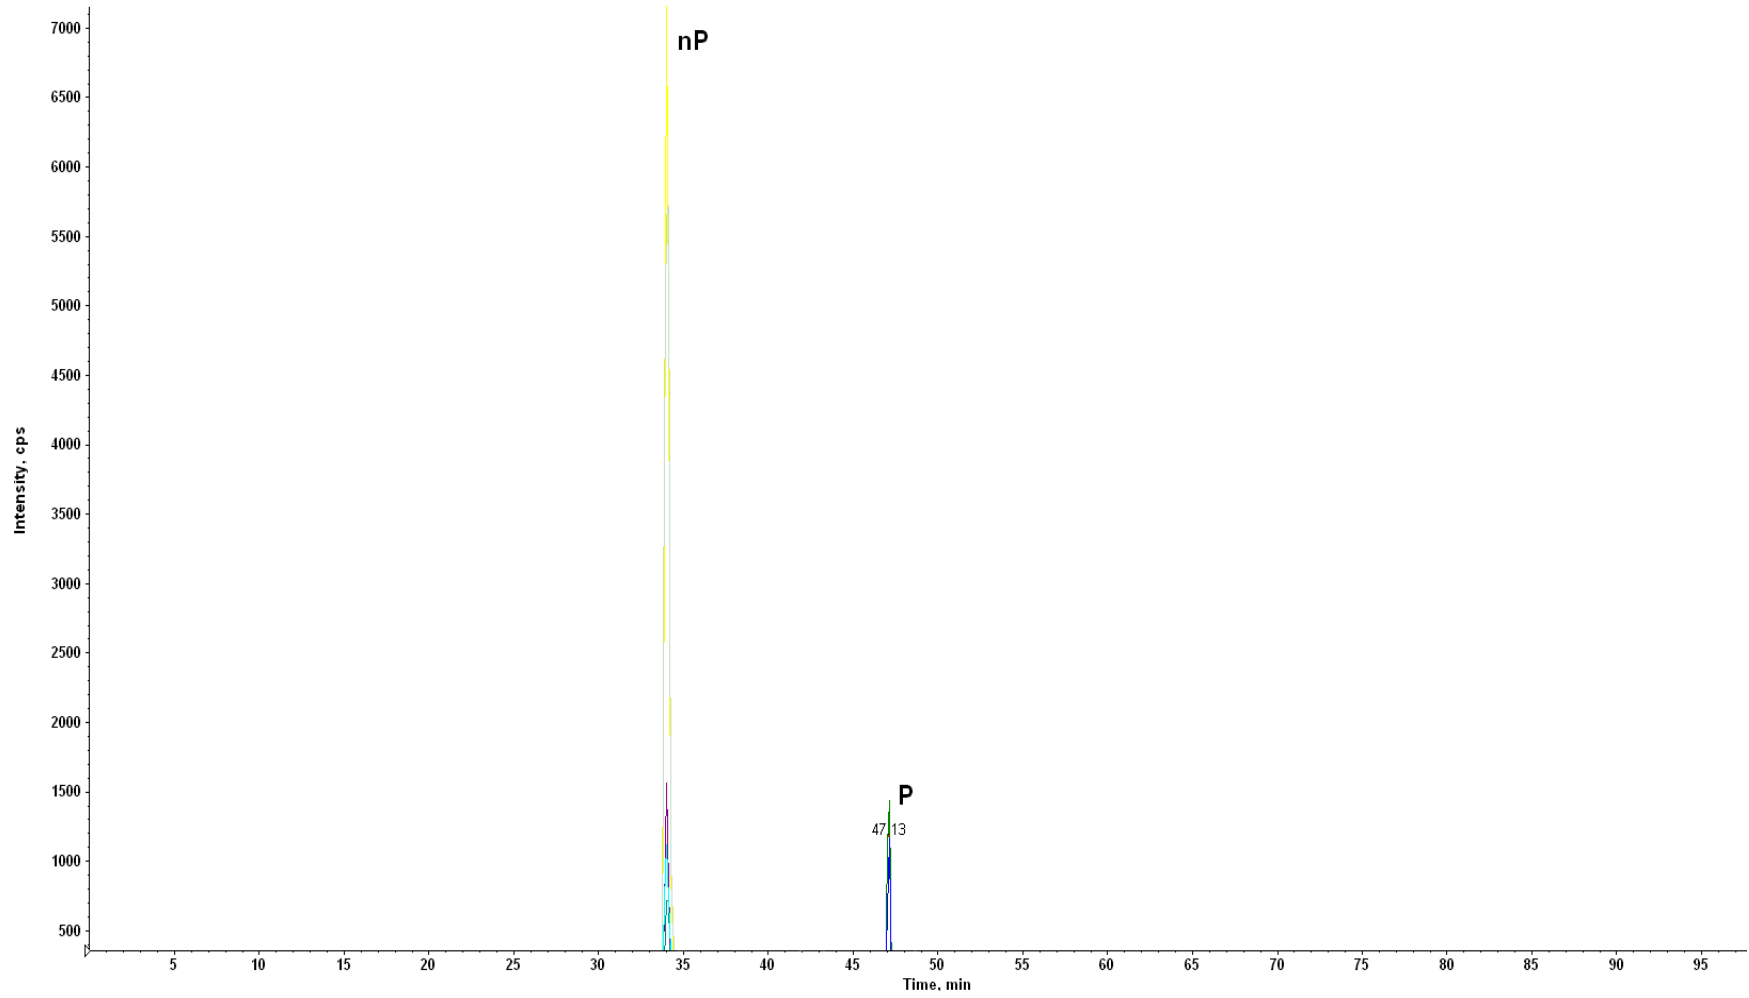

Name: SACE\_0821

FTDRTISSADR

FTDRT[Pho]IS[Pho]SADR

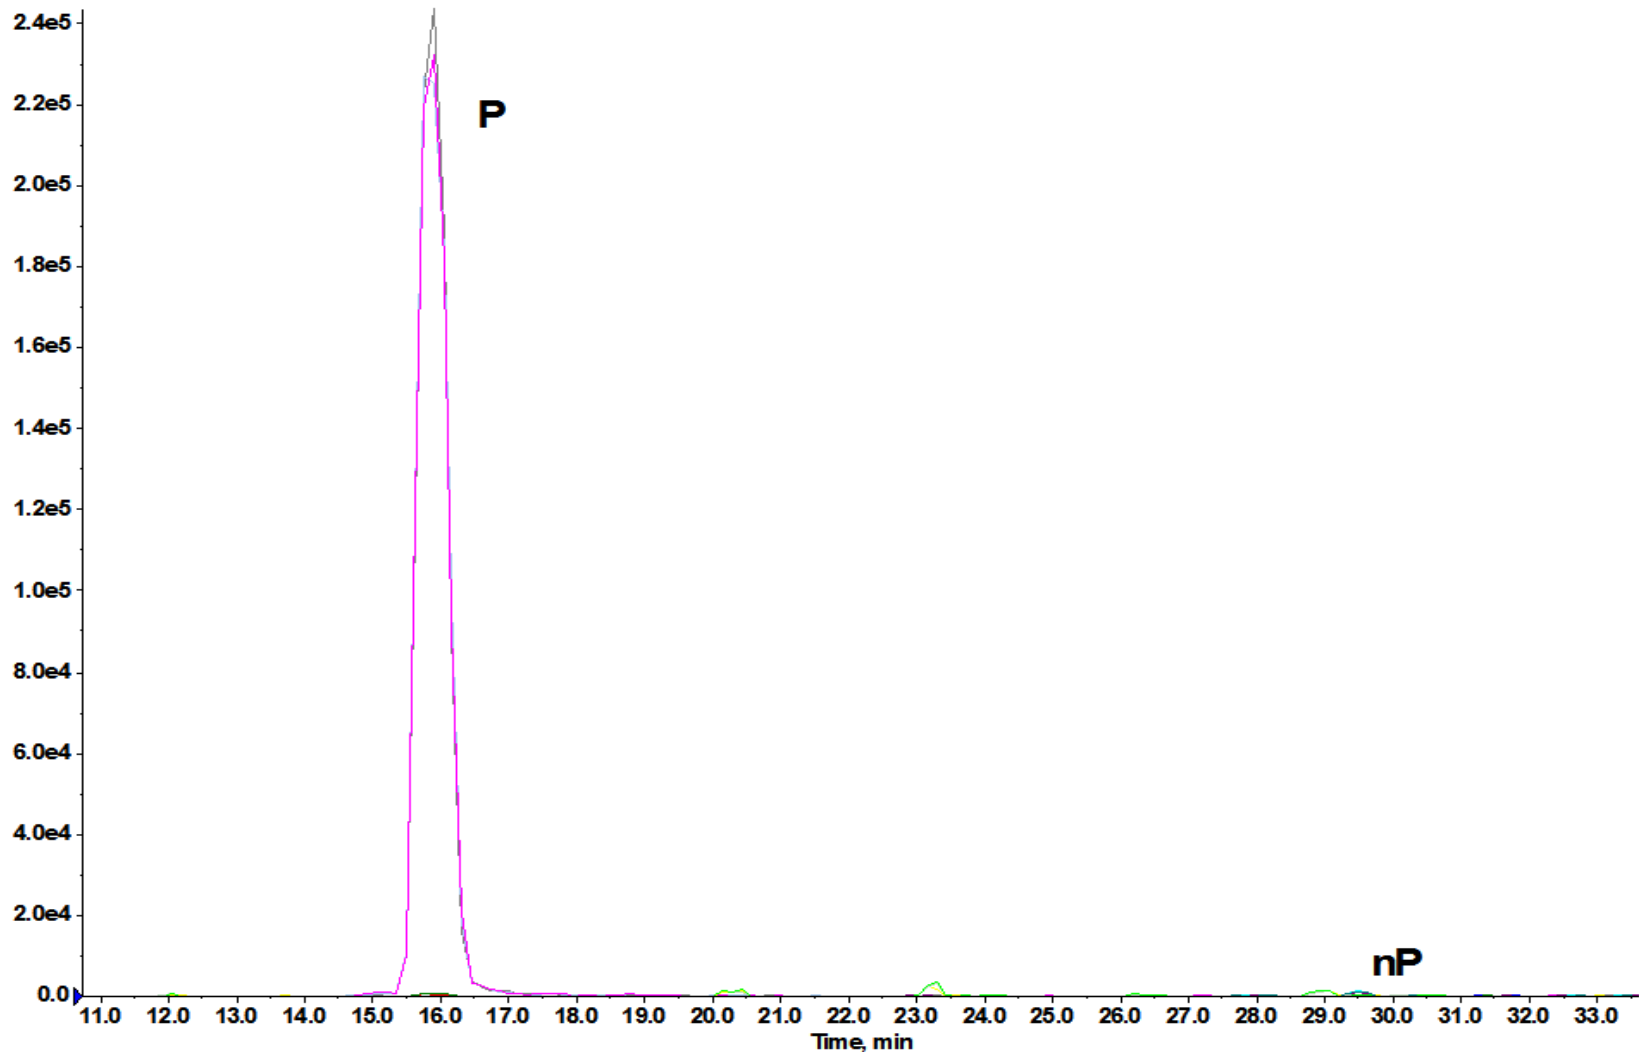

AAARGISR  
AAARGIS[Pho]R

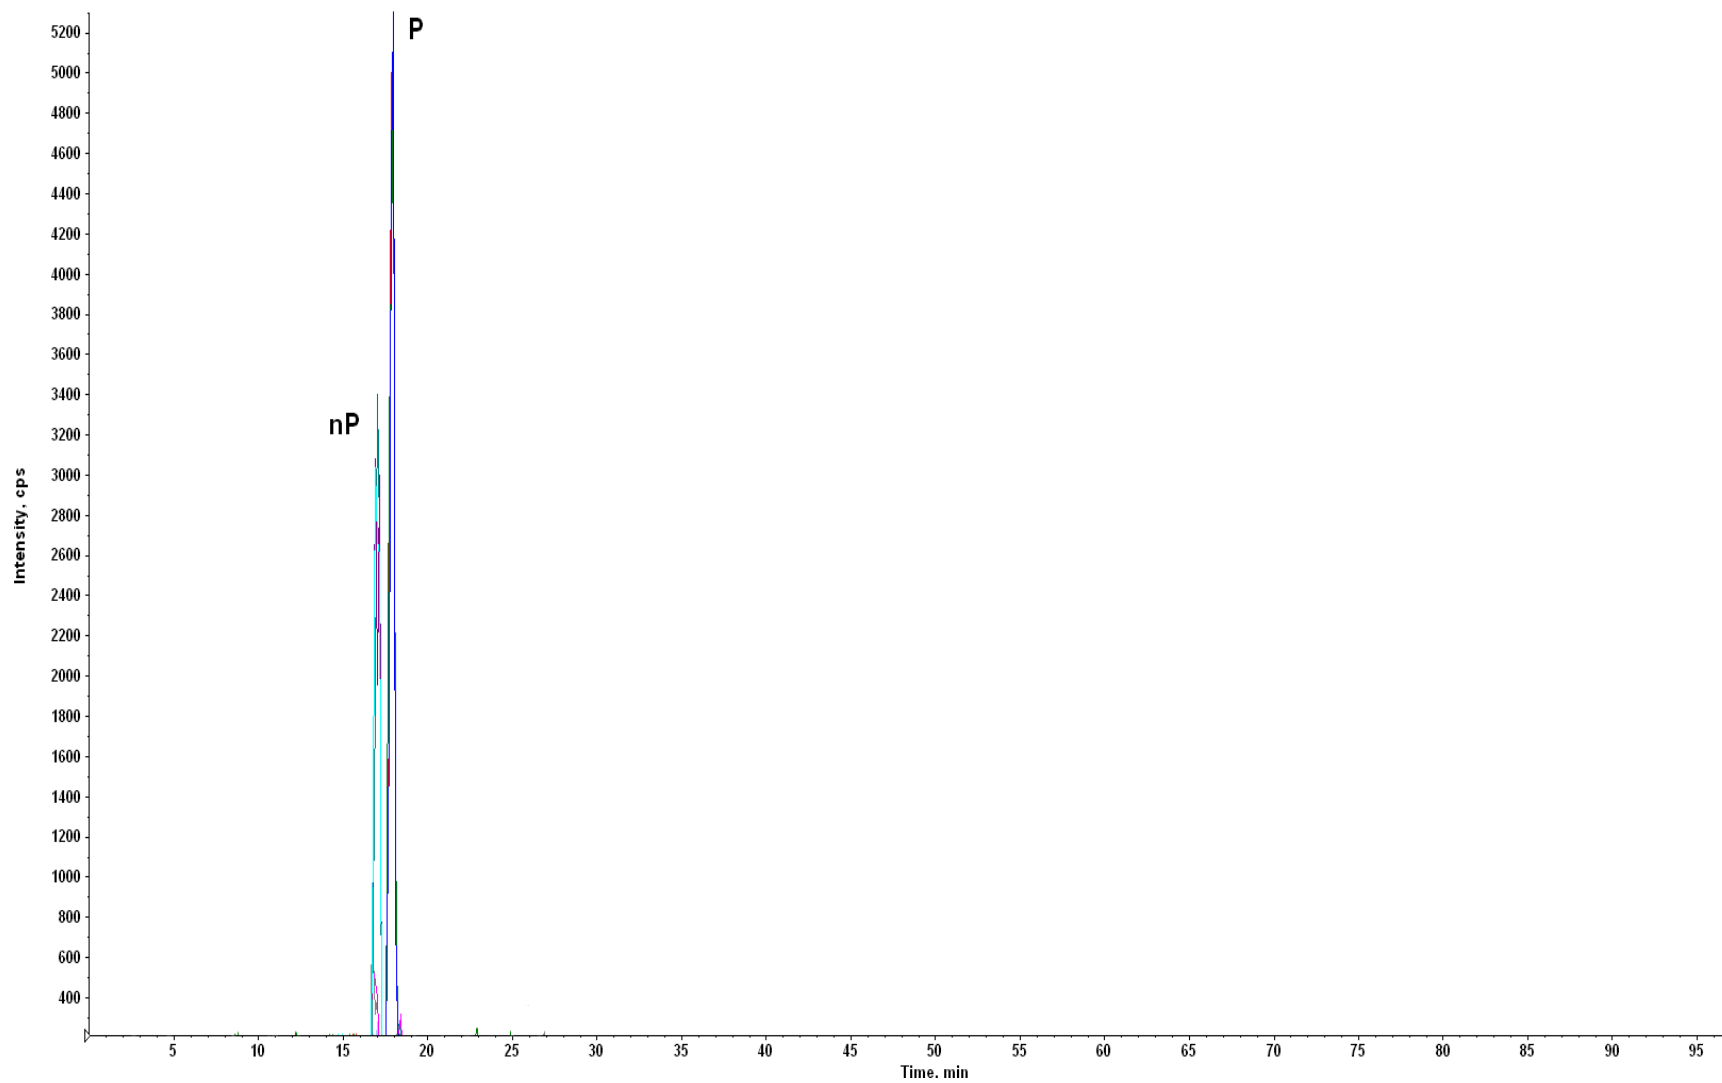

ALGSATPLAGRNP  
ALGS[Pho]ATPLAGRNP

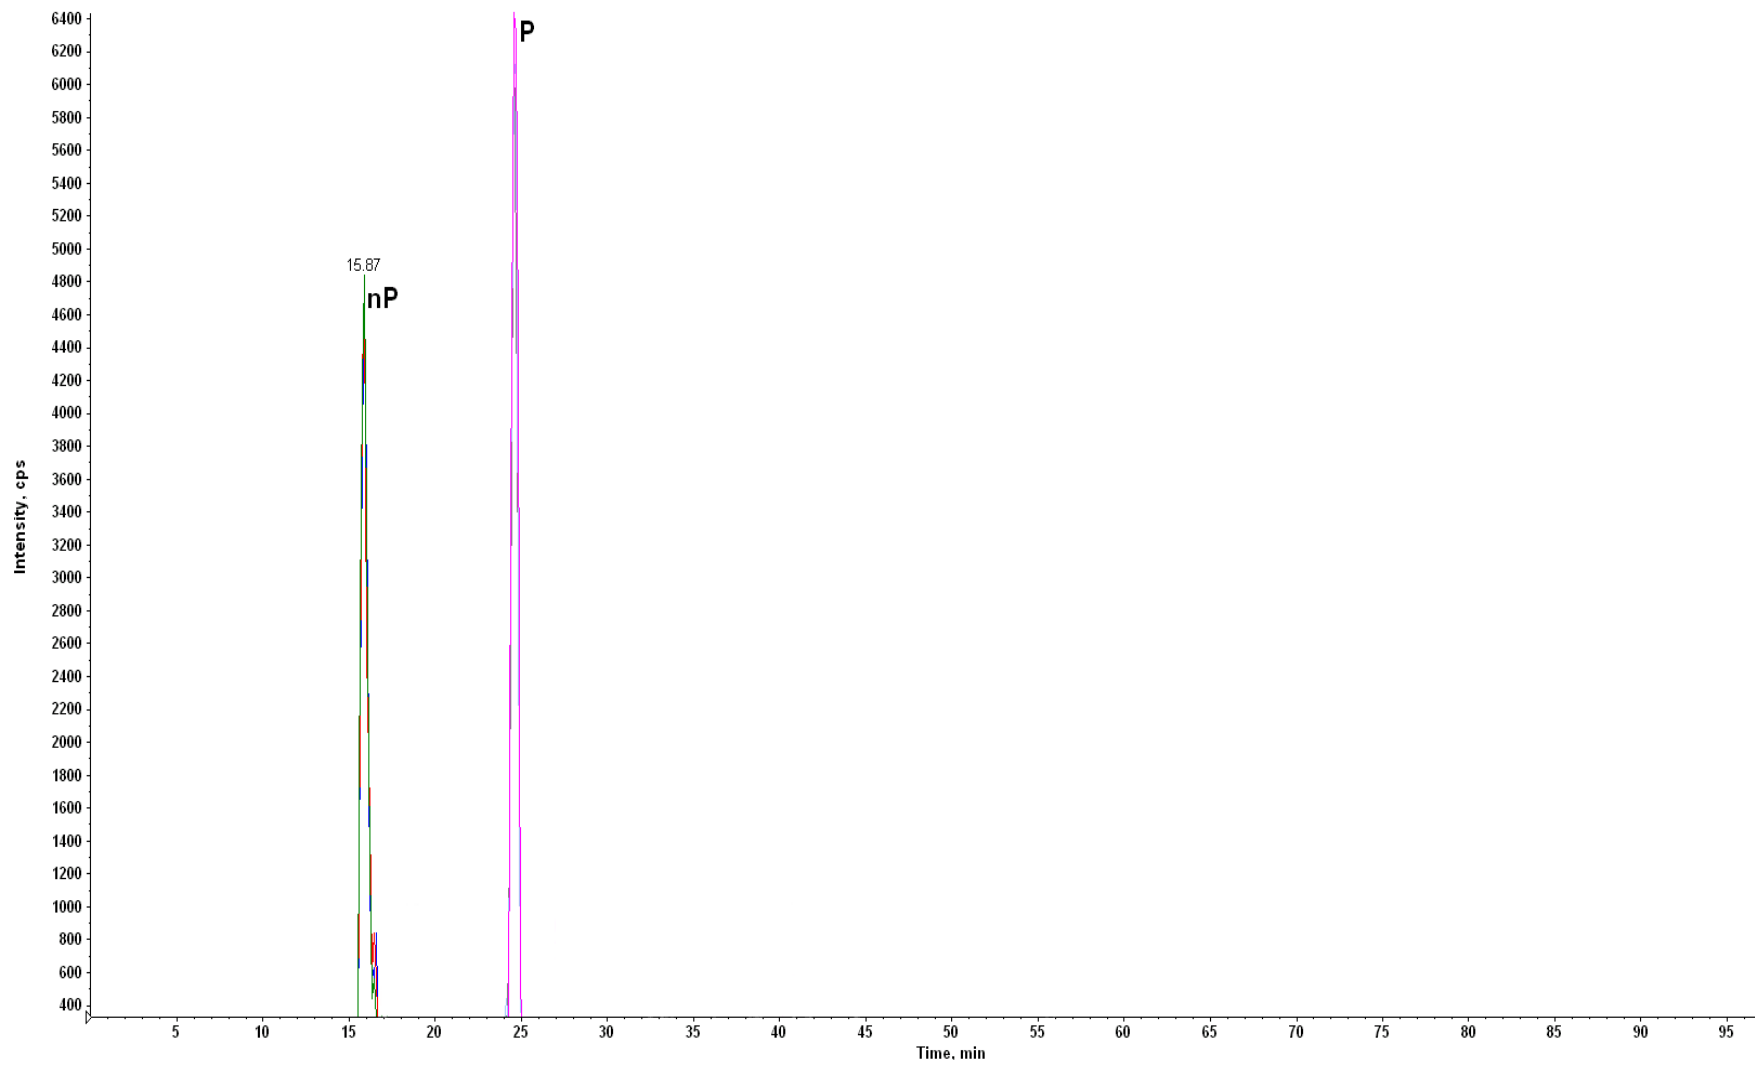

Name: SACE\_0519

ELTIGLPDAATR  
ELTIGLPDAAT[Pho]R

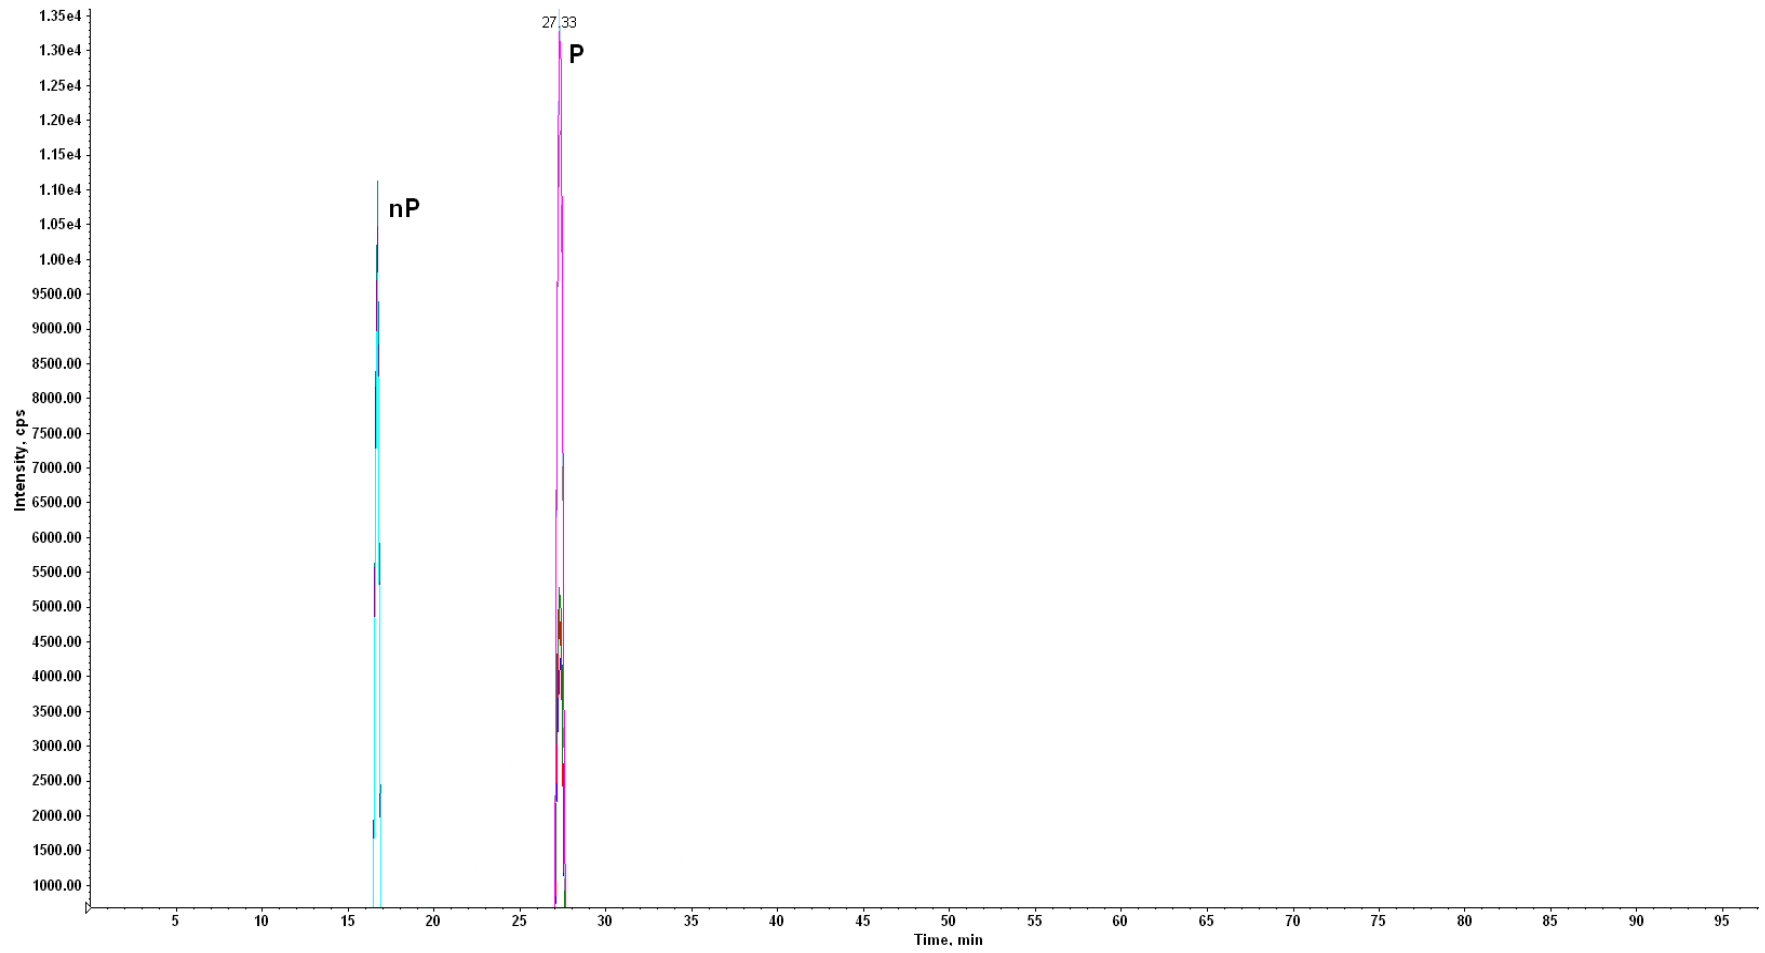

ESAVVAALRHR  
ES[Pho]AVVAALRHR

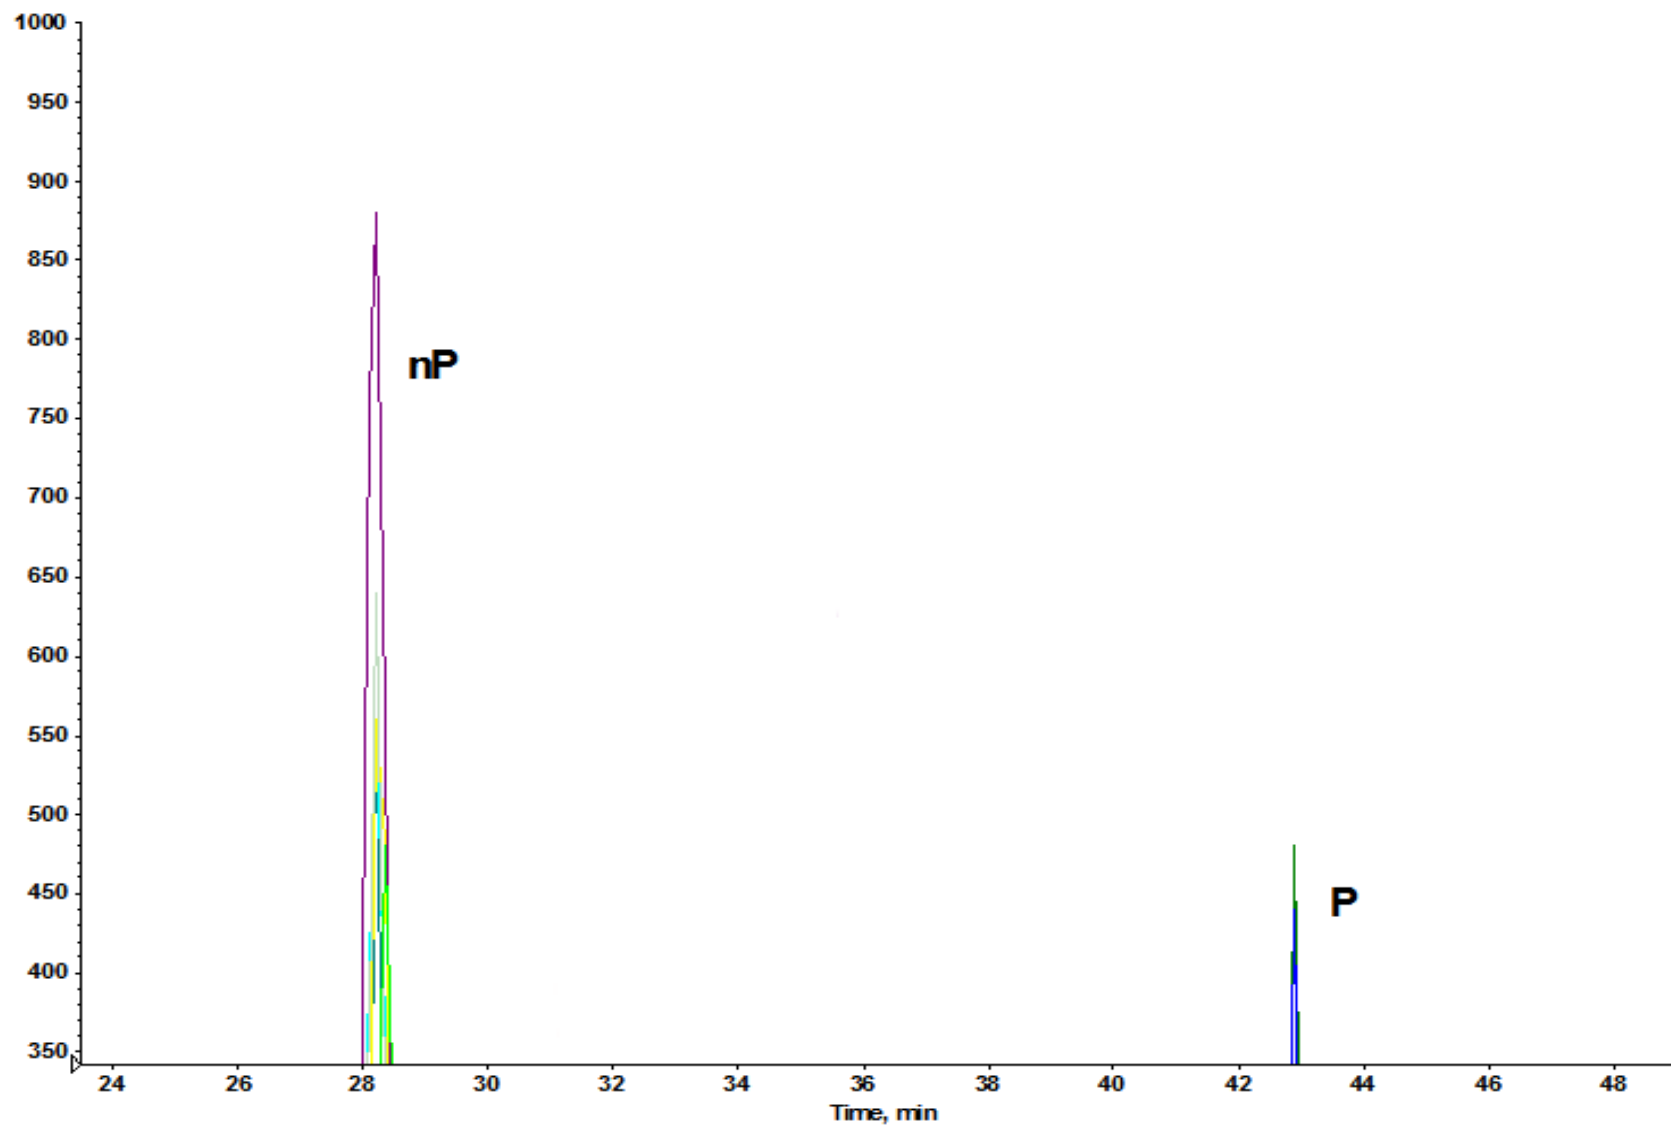



RLGATPHLGVLVSGPSGVGK  
RLGATPHLGVLVS[Pho]GPSGVGK

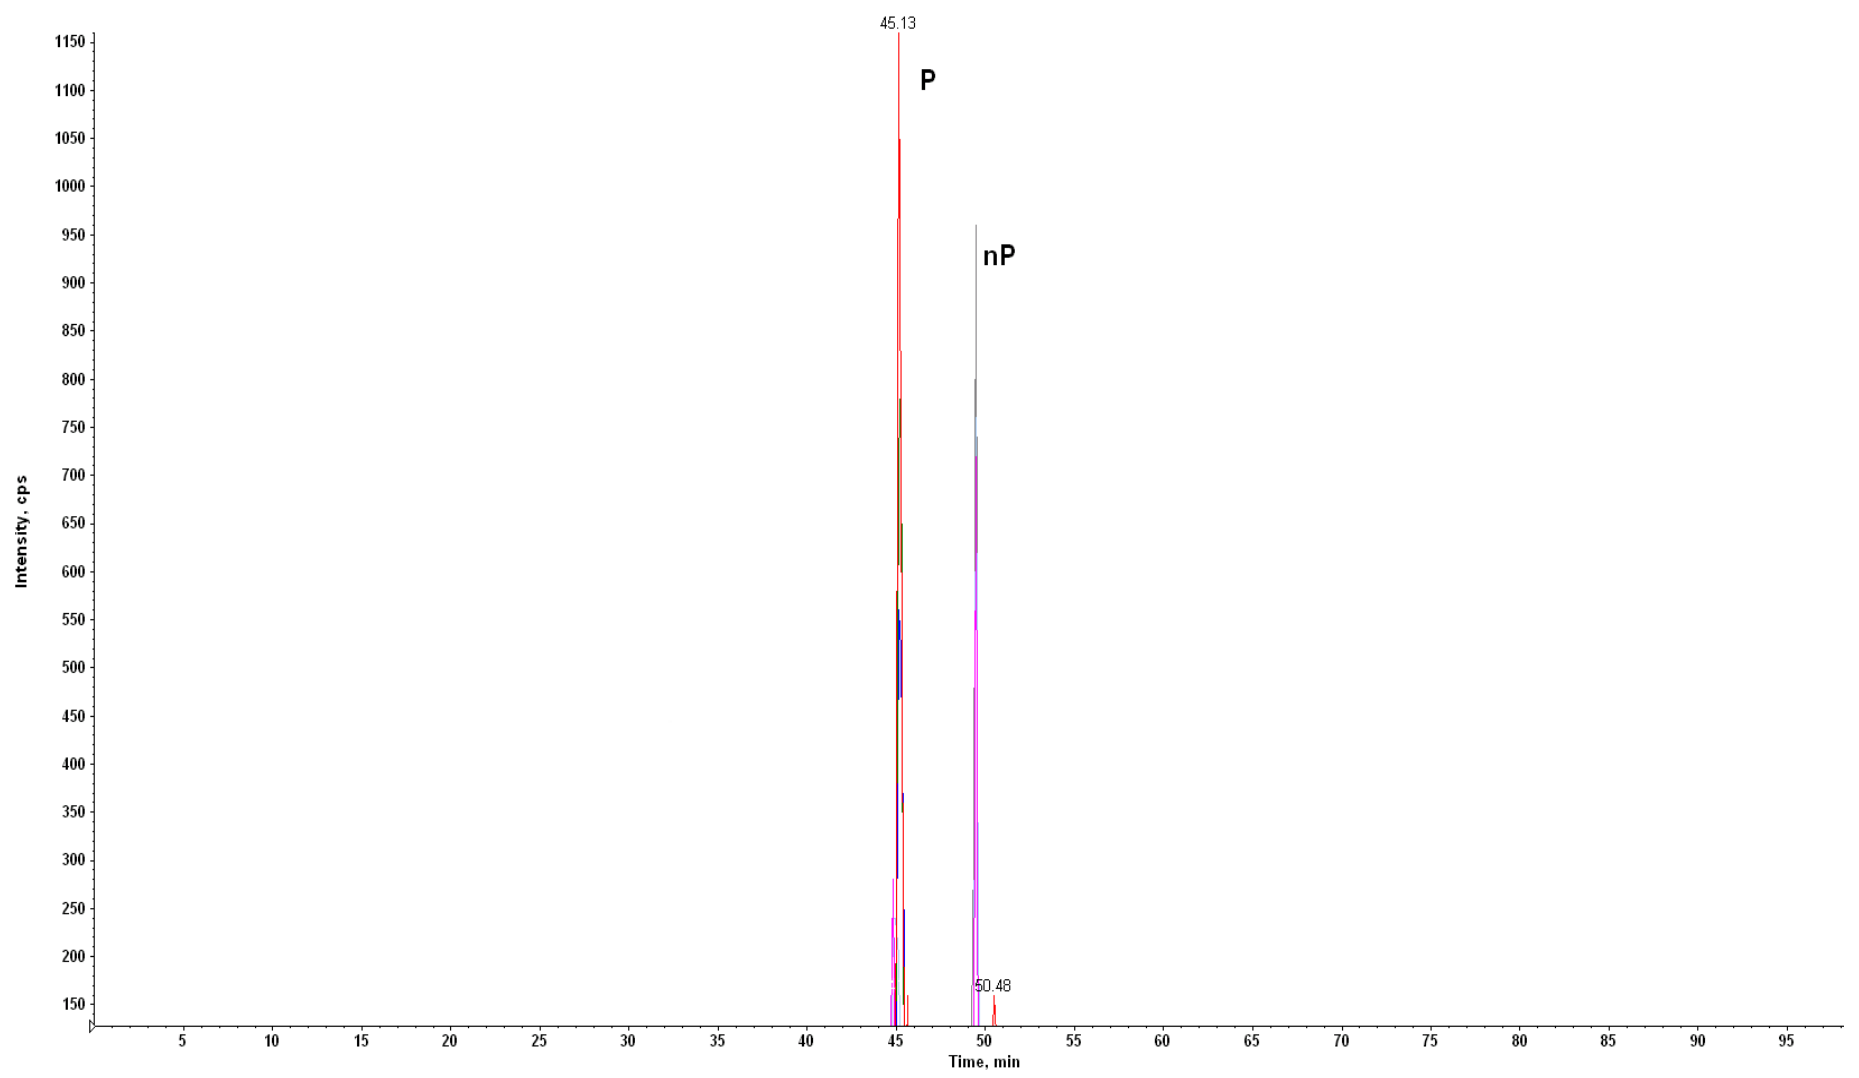

Name: SACE\_2875

QQPVTAVVTGSLR  
QQPVT[Pho]AVVTGSLR

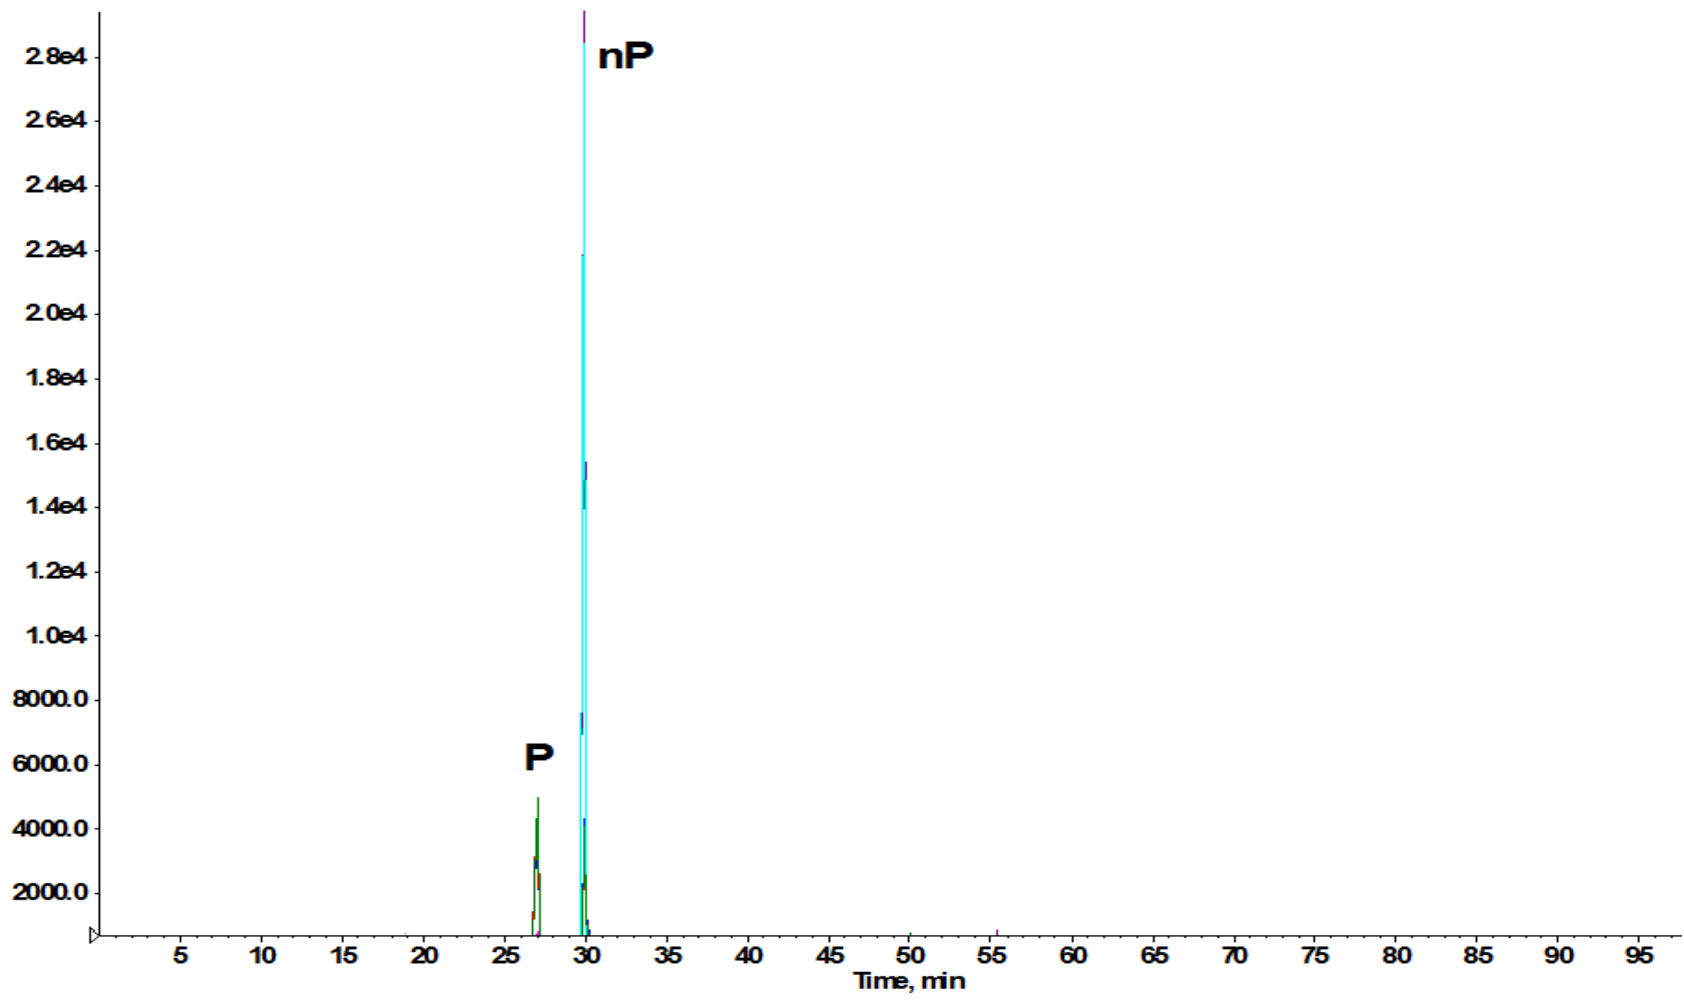

HVGKVVLSVPR  
HVGKVVLS[Pho]VPR

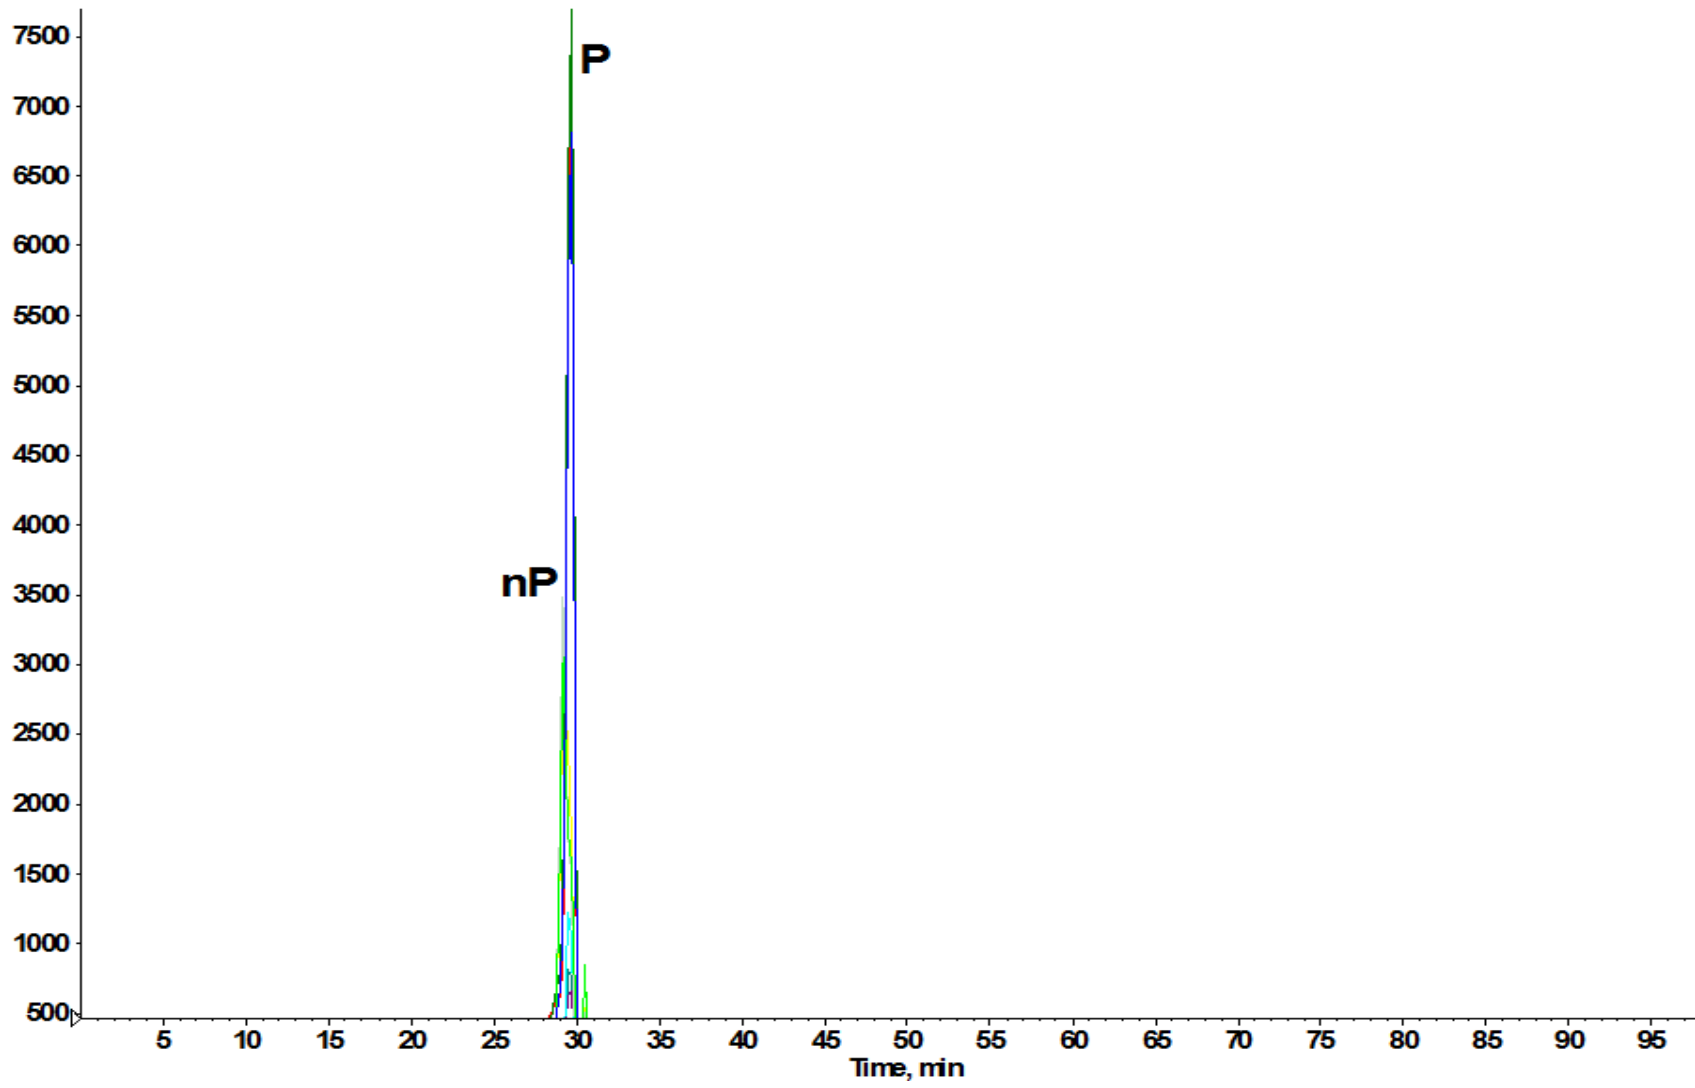

SGVALRPRANR  
S[Pho]GVALRPRANR

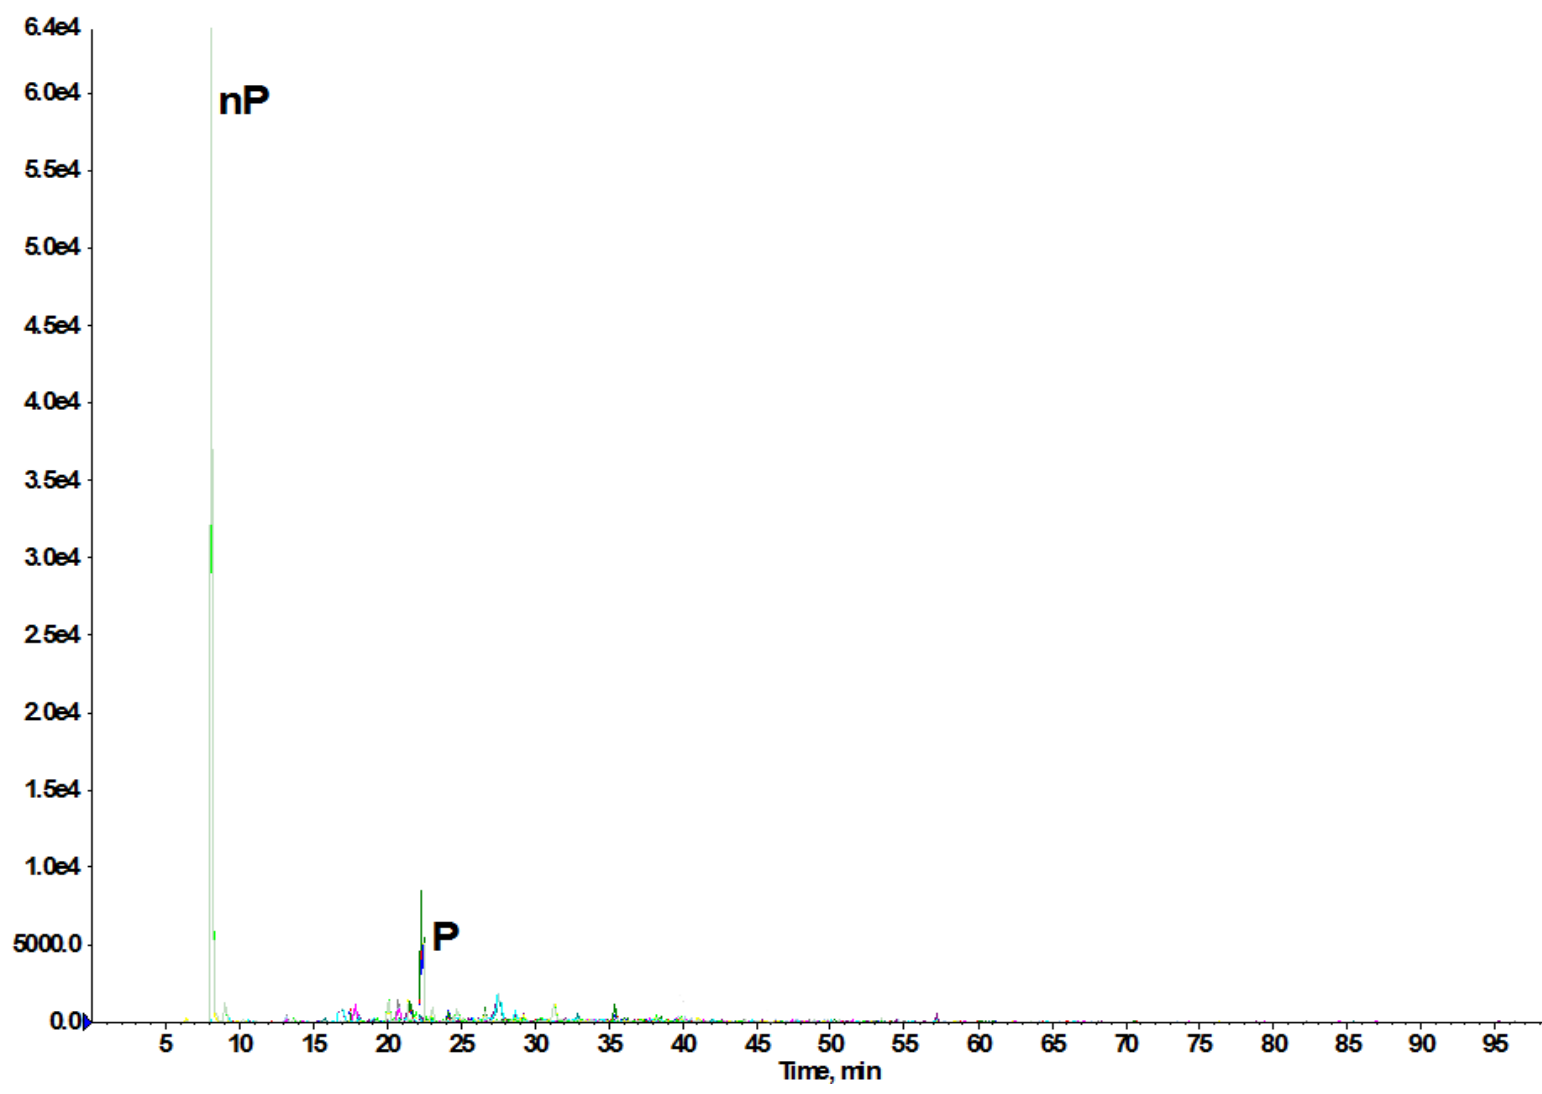

Name: SACE\_2947

GLNATSIR  
GLNAT[Pho]SIR

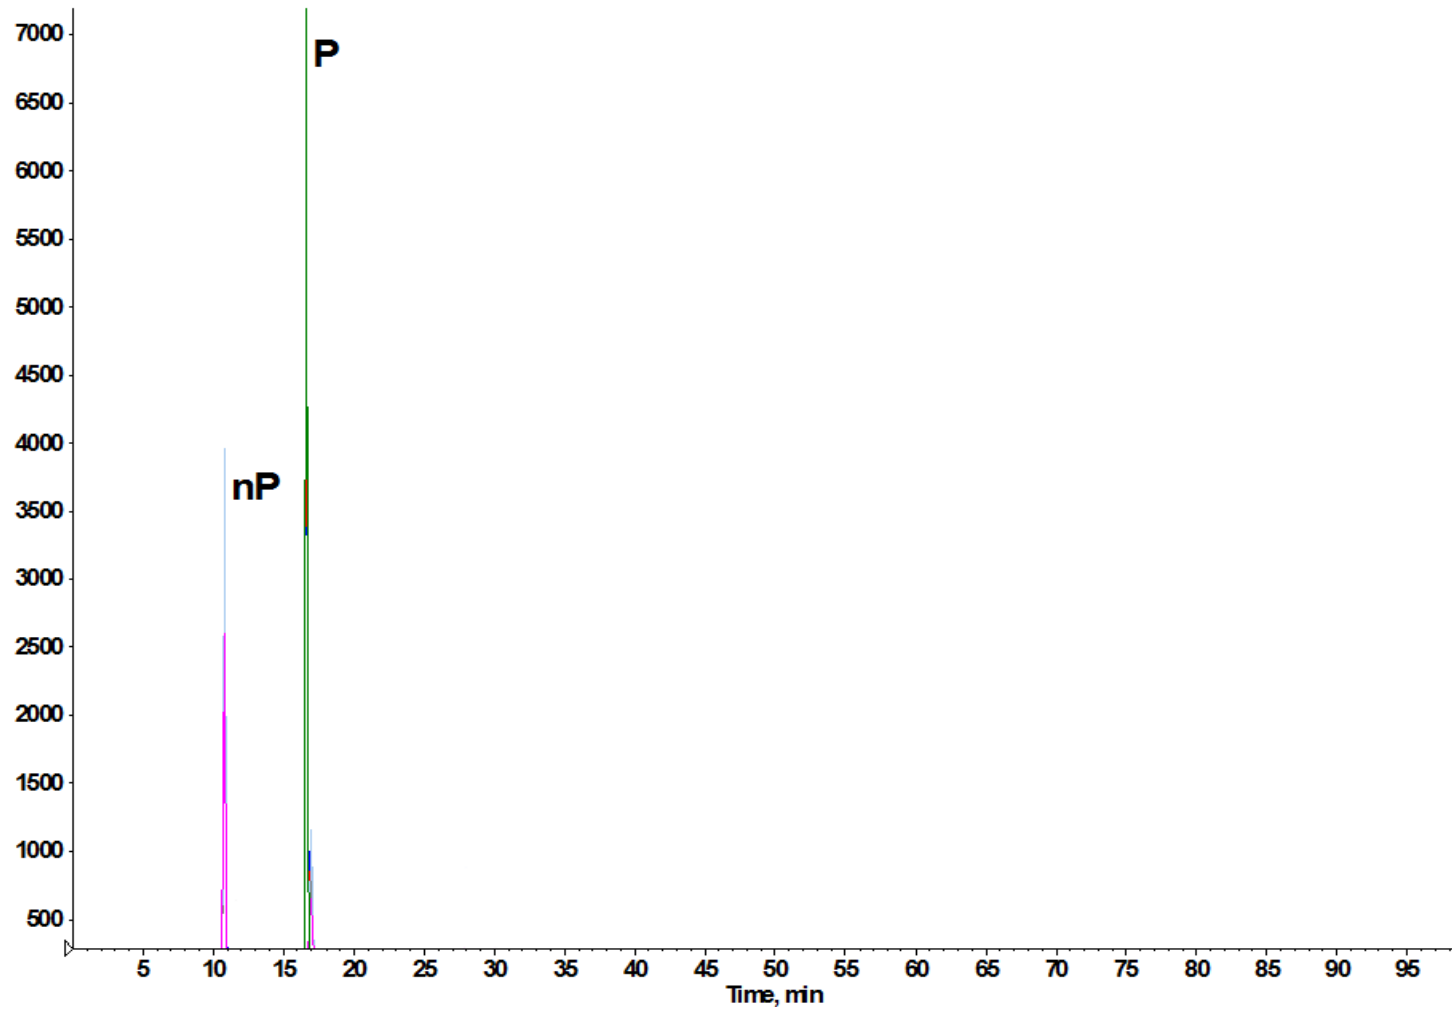

Name: SACE\_4140

ASVTASDR  
AS[Pho]VTASDR

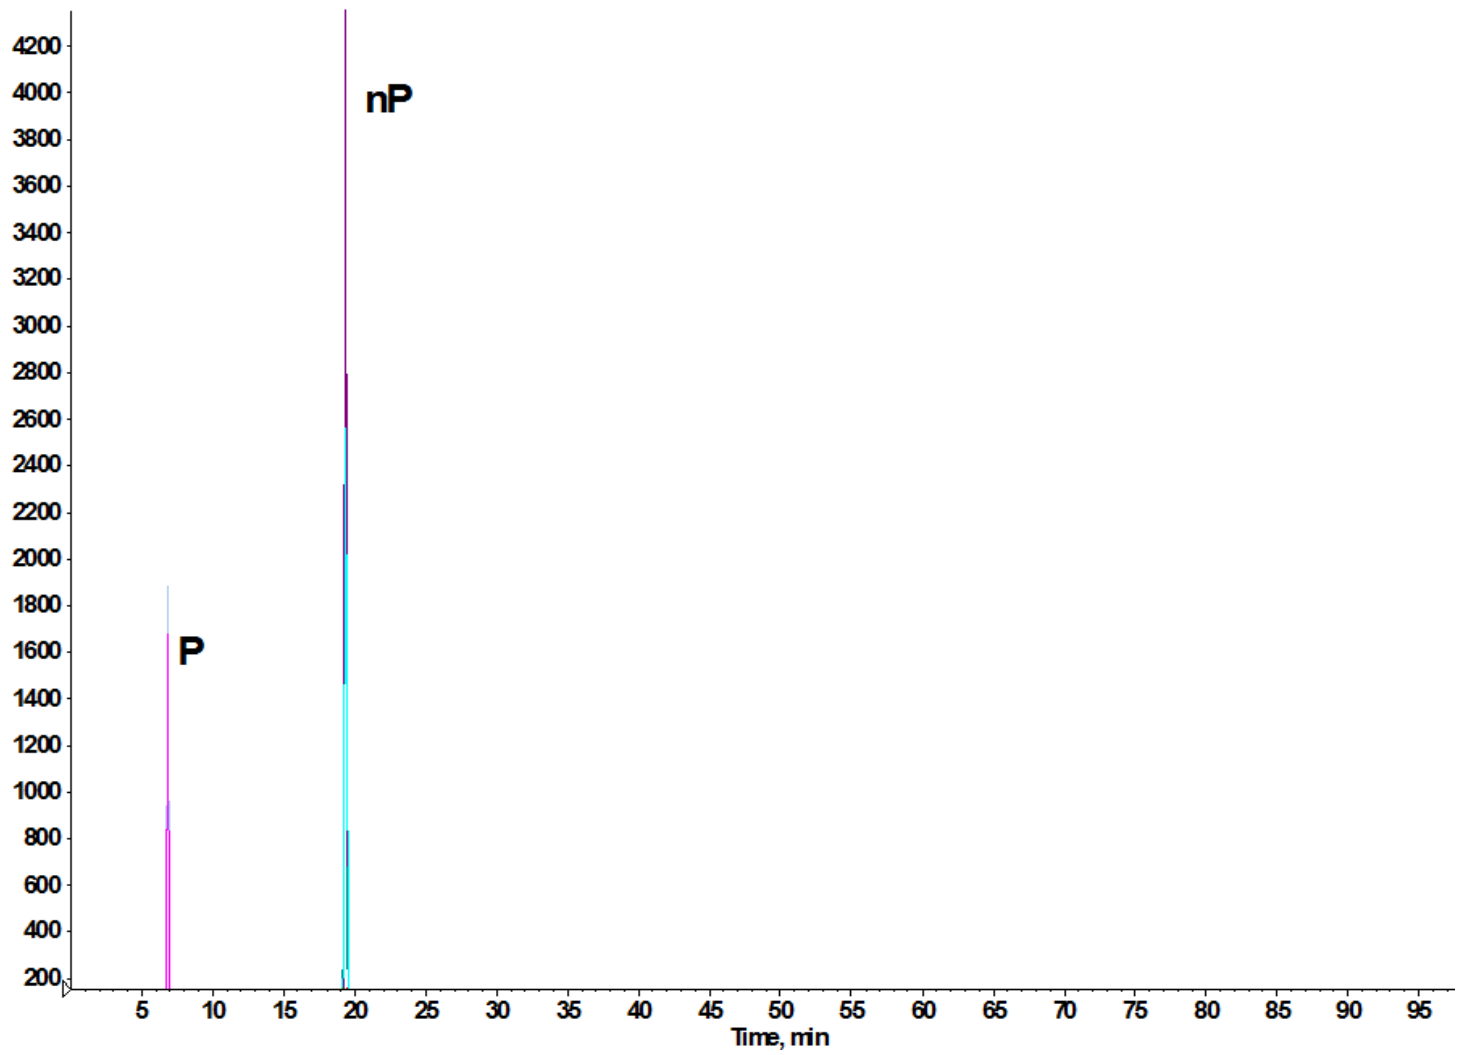

DSSWAVQLEALSESRR  
DSSWAVQLEALSES[Pho]RR

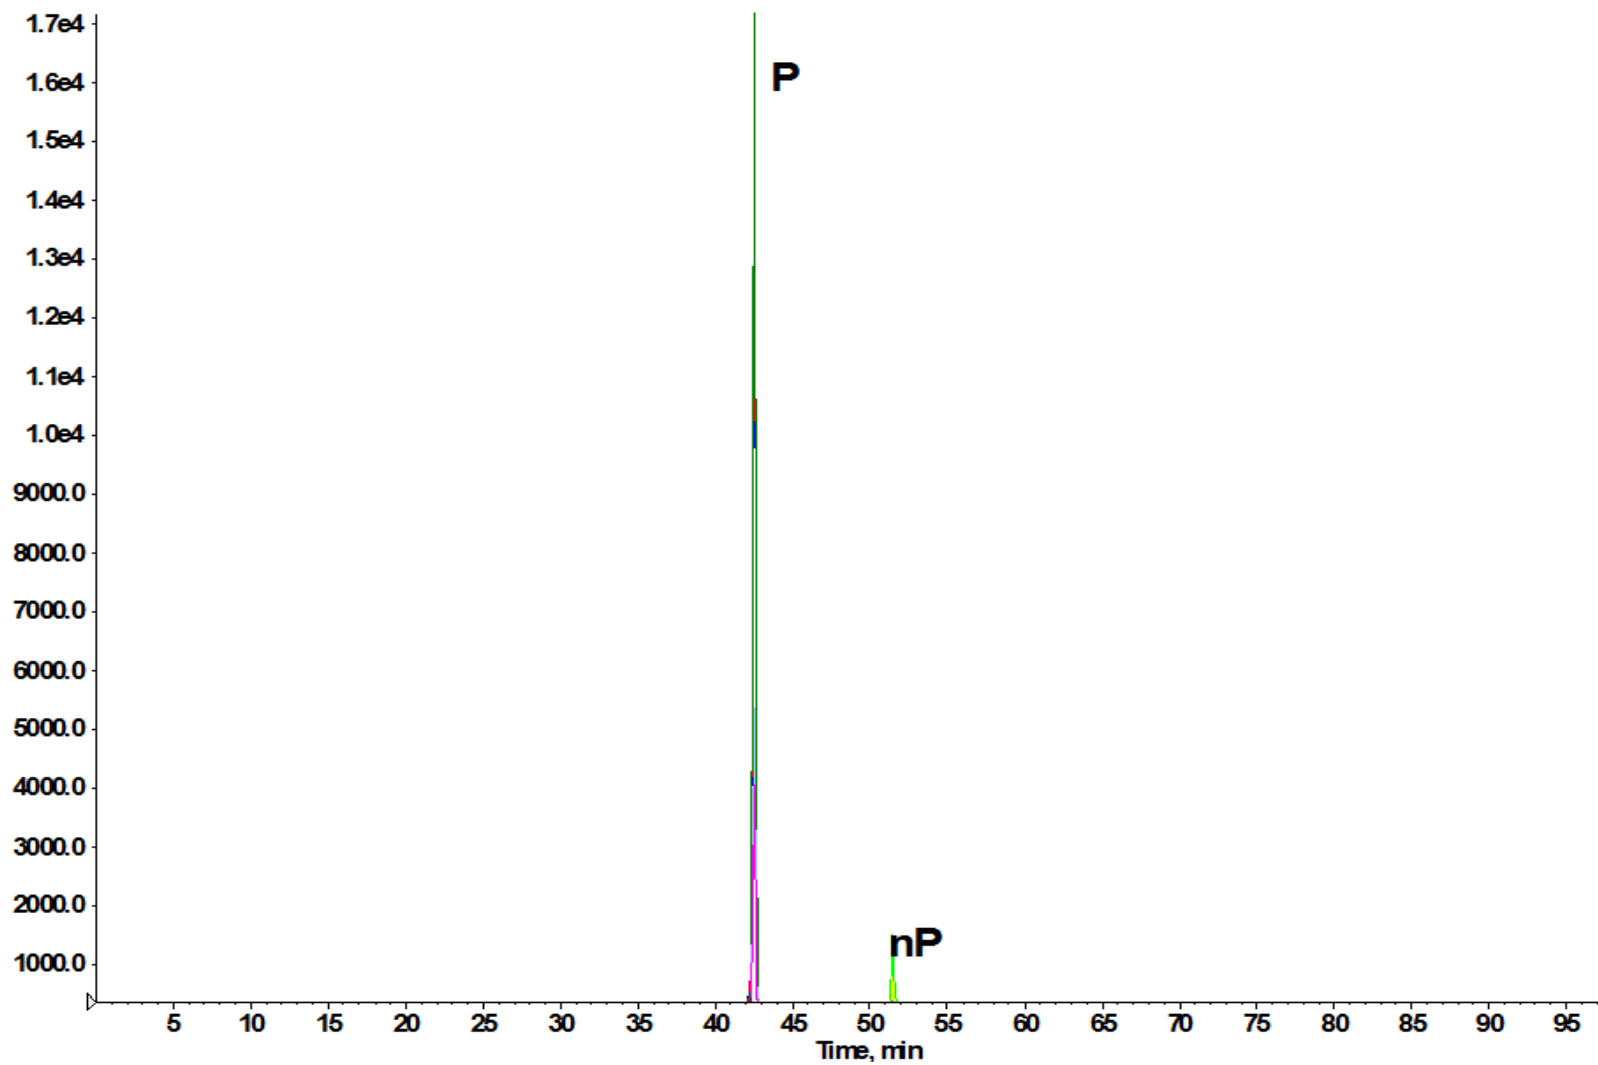

Name: SACE\_4355

STSTHHFRVLREAGVIR  
STS[Pho]THHFRVLREAGVIR

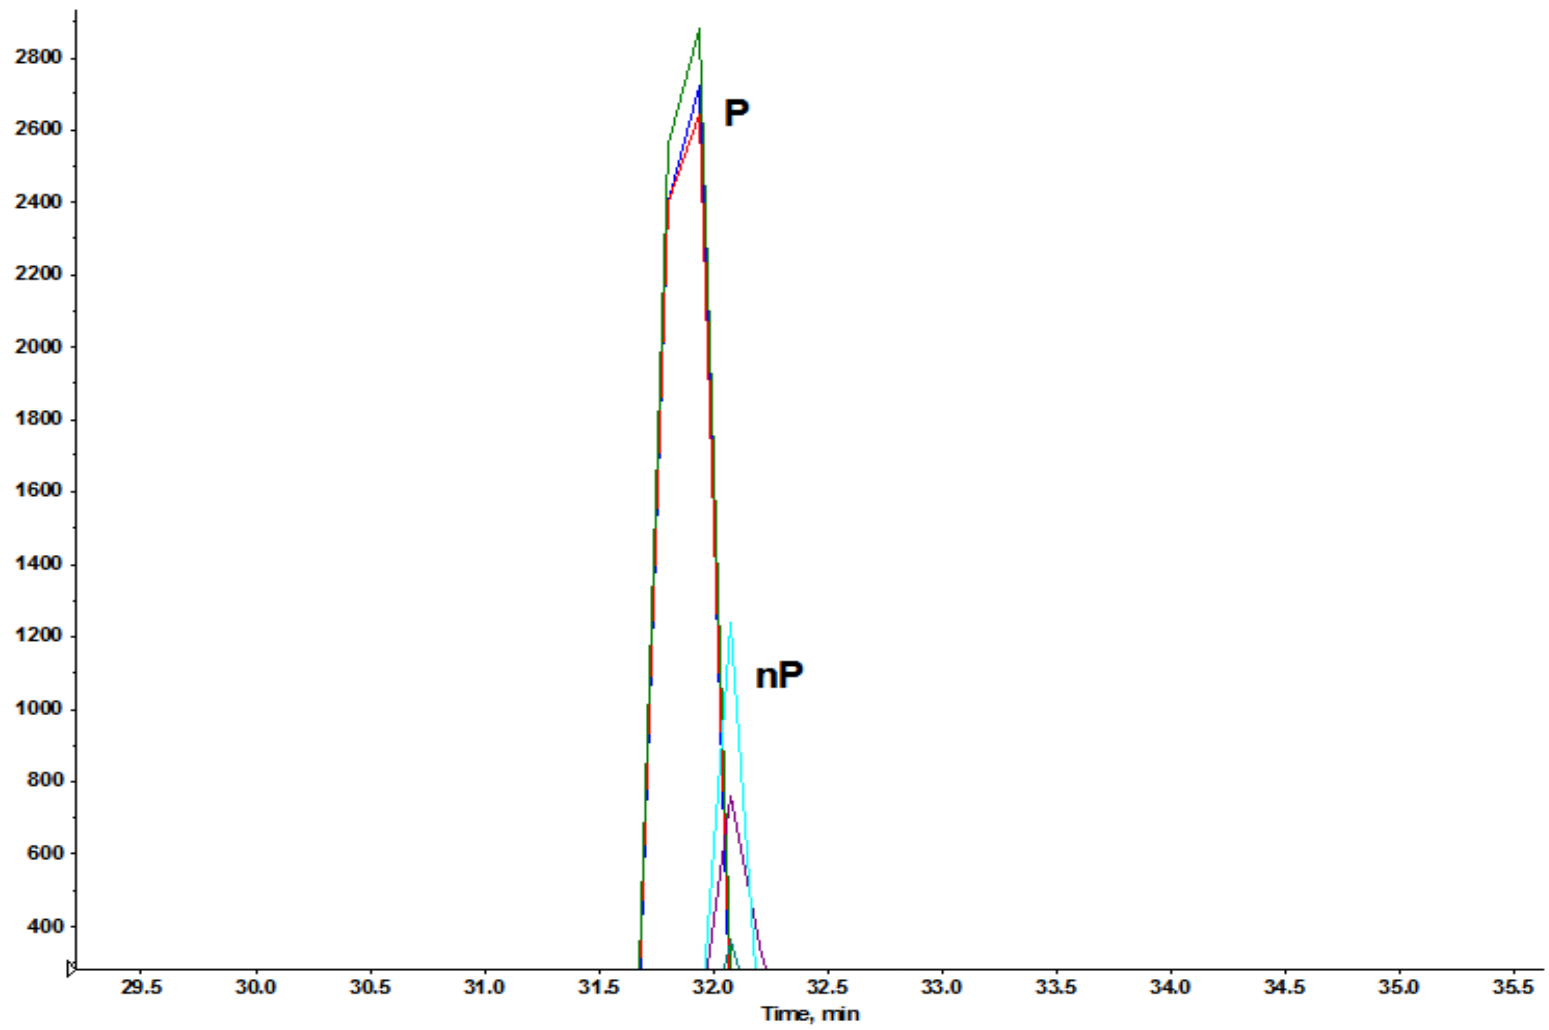



Name: SACE\_4561

GTFSIDIGR

GTFS[Pho]IDIGR

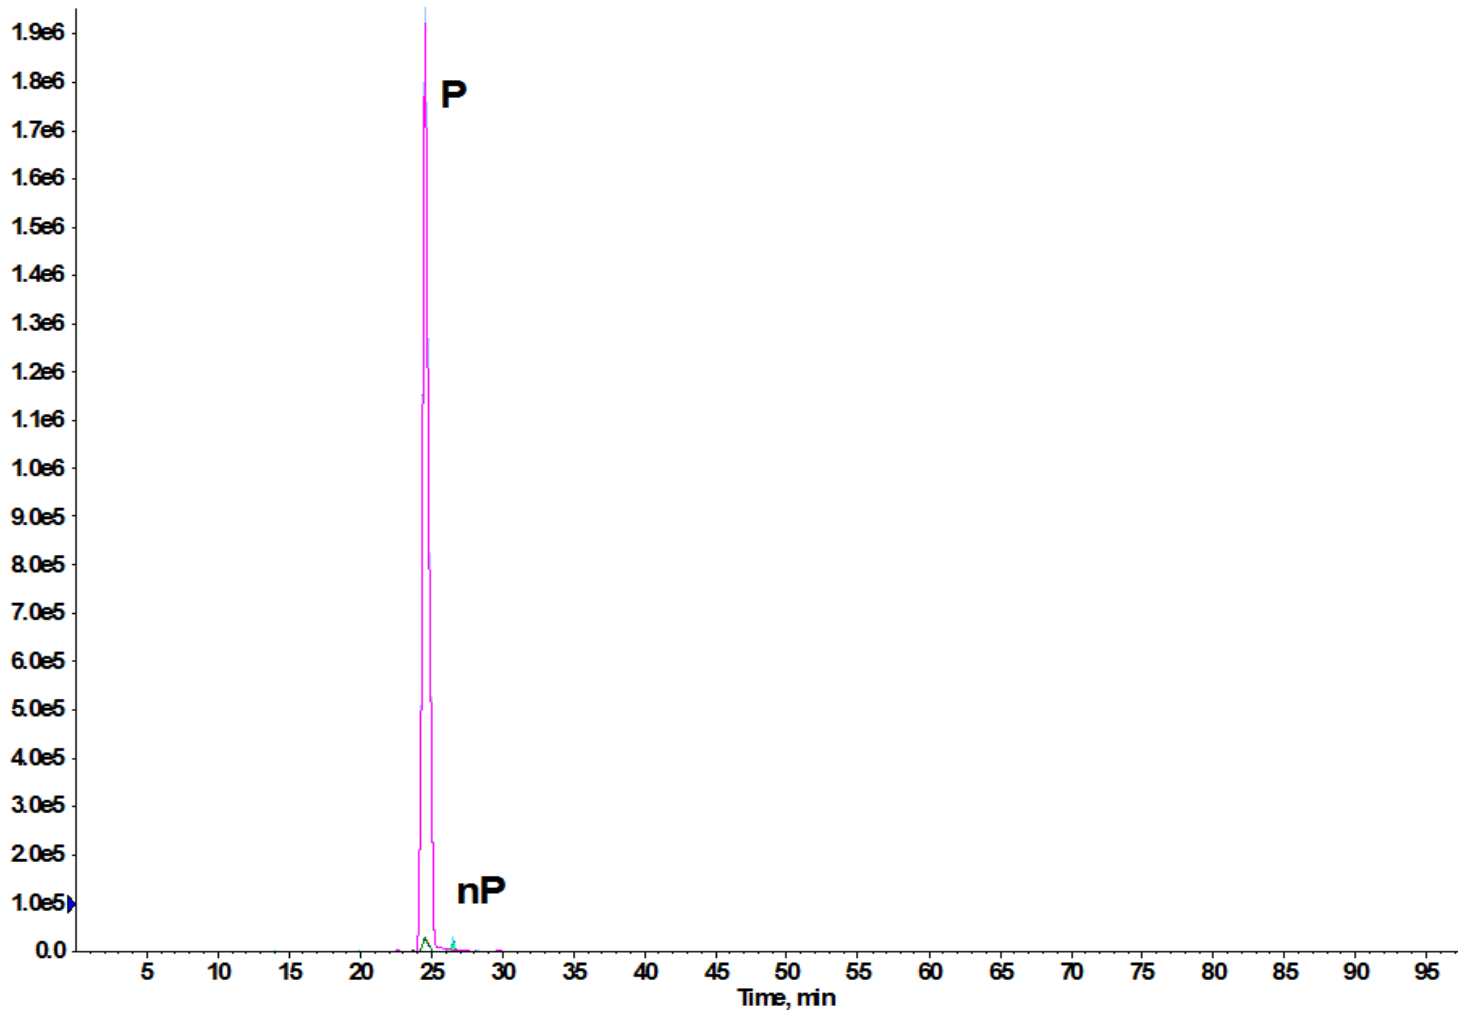

GRESRIR  
GRES[Pho]RIR

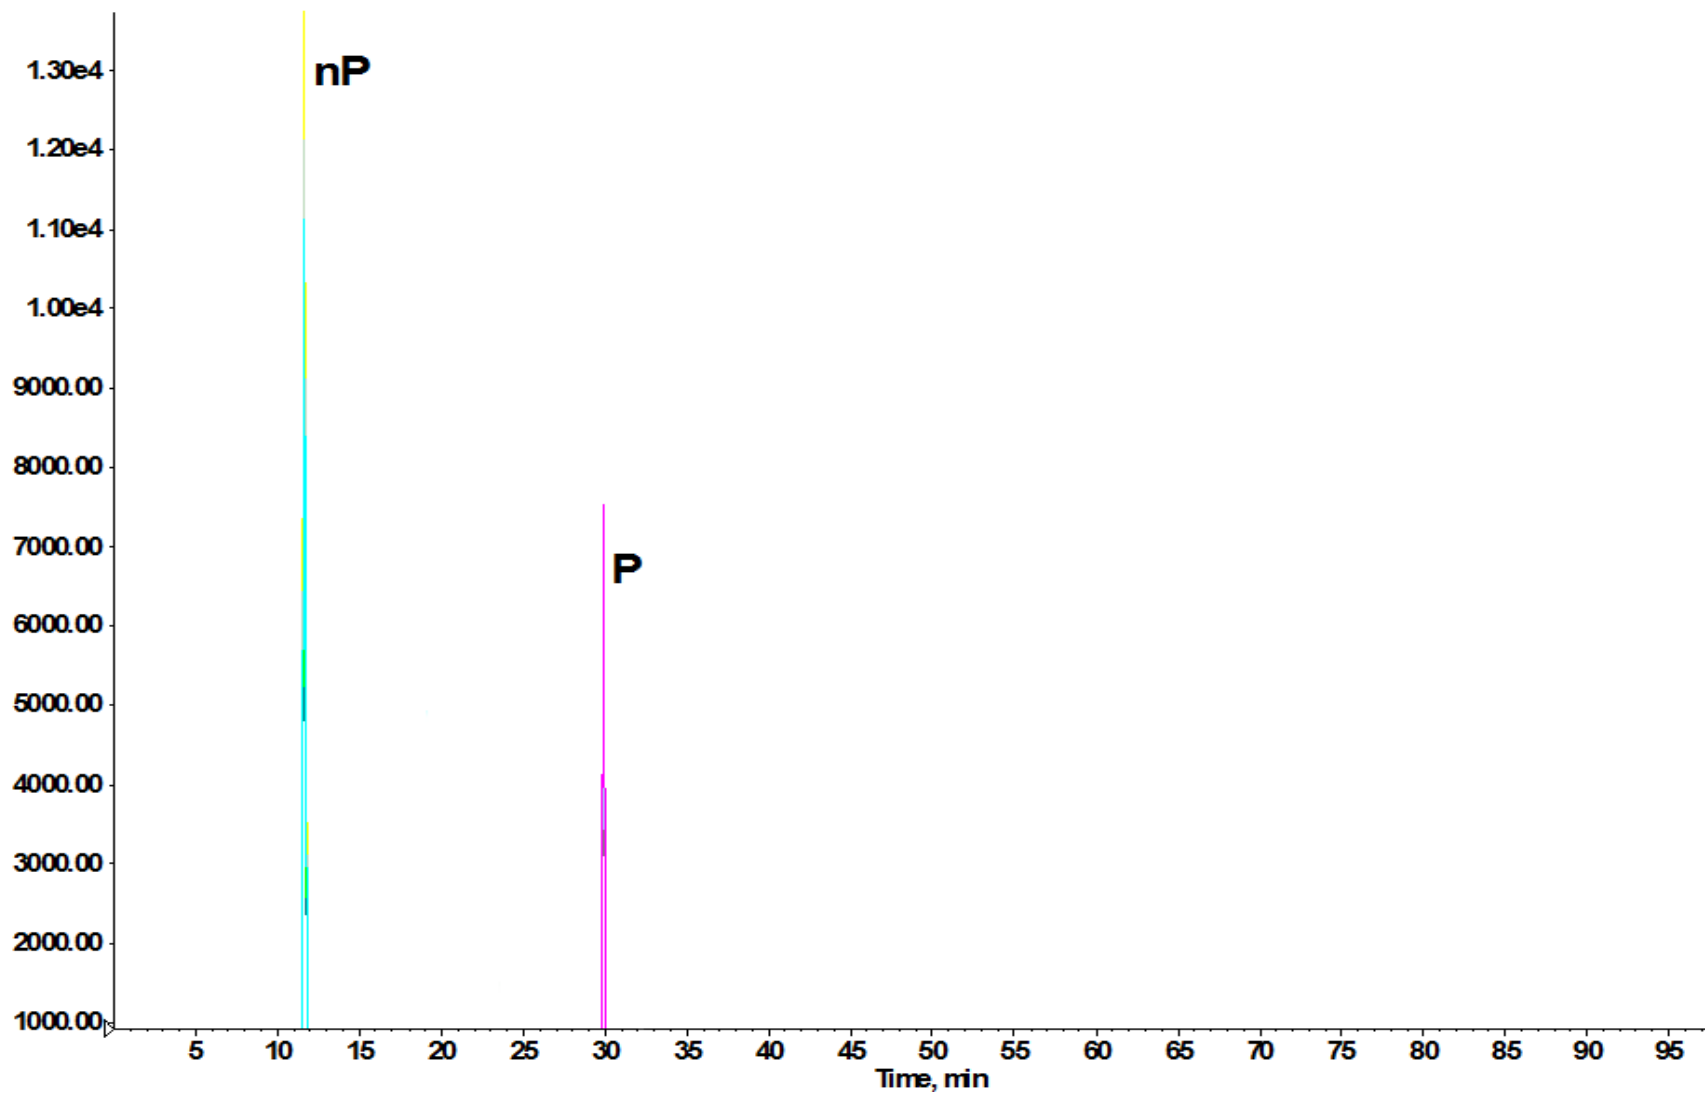

IAVVGGSVAGLSSAILLAR  
IAVVGGSVAGLS[Pho]SAILLAR

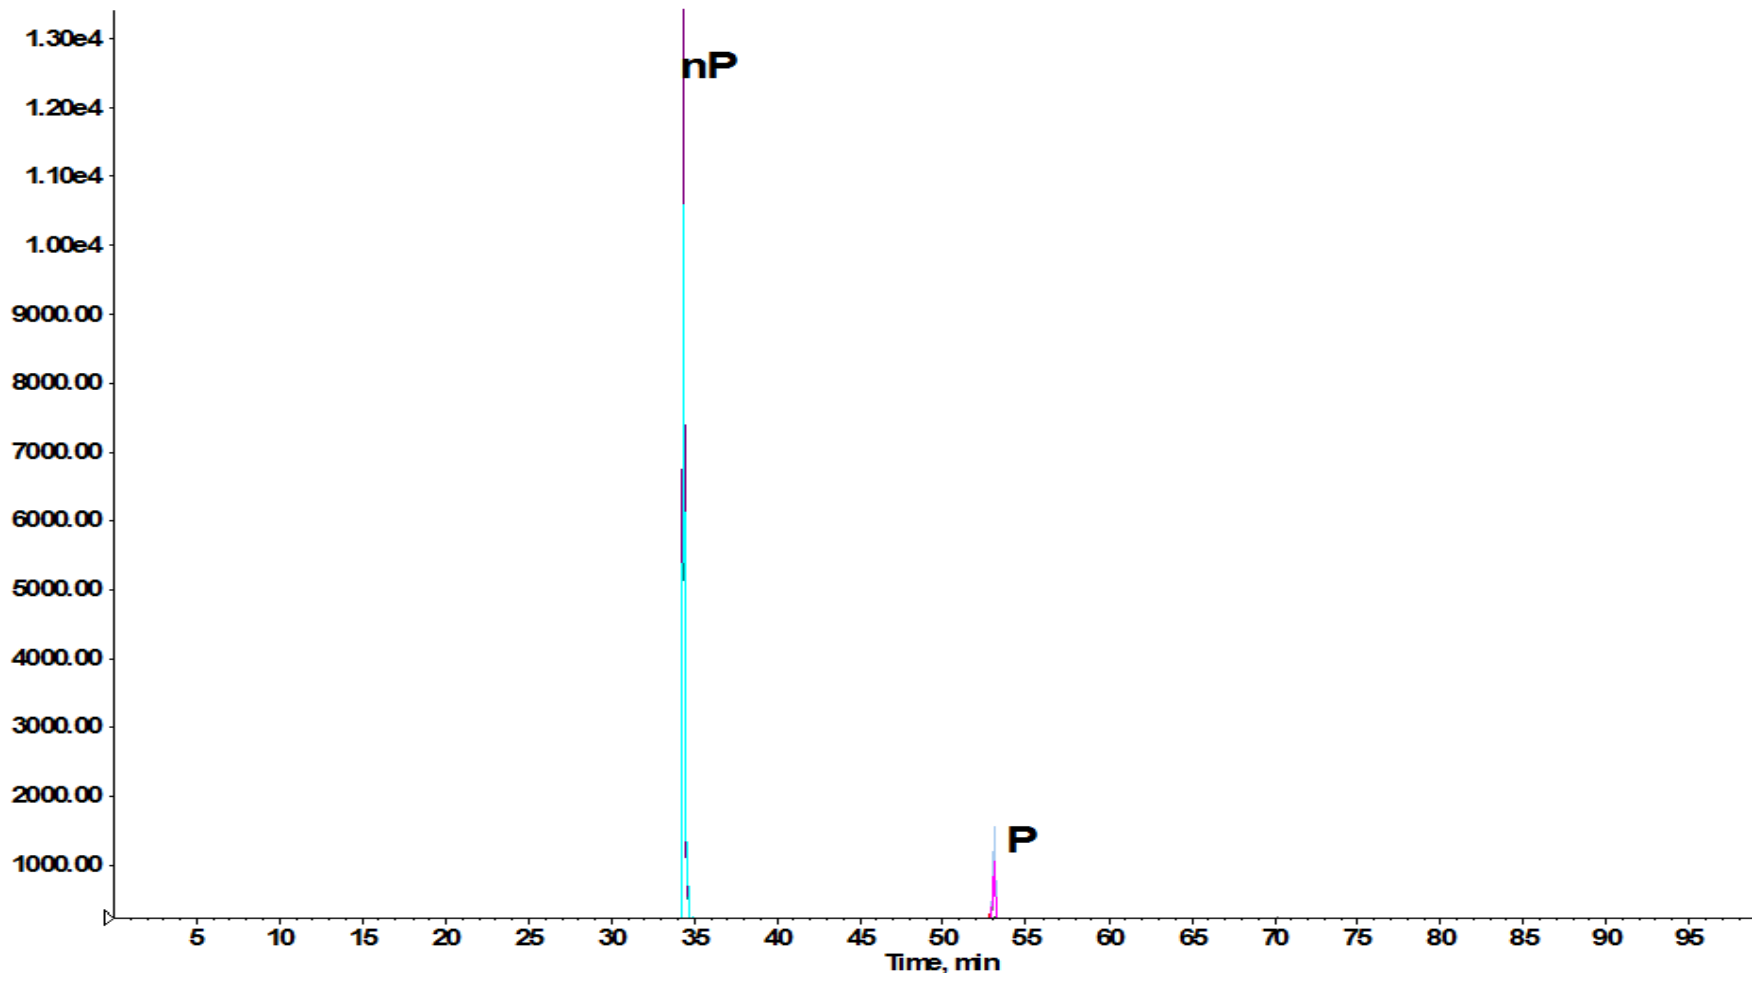

Name: SACE\_4761

VSVAPFSELARR  
VS[Pho]VAPFSELARR

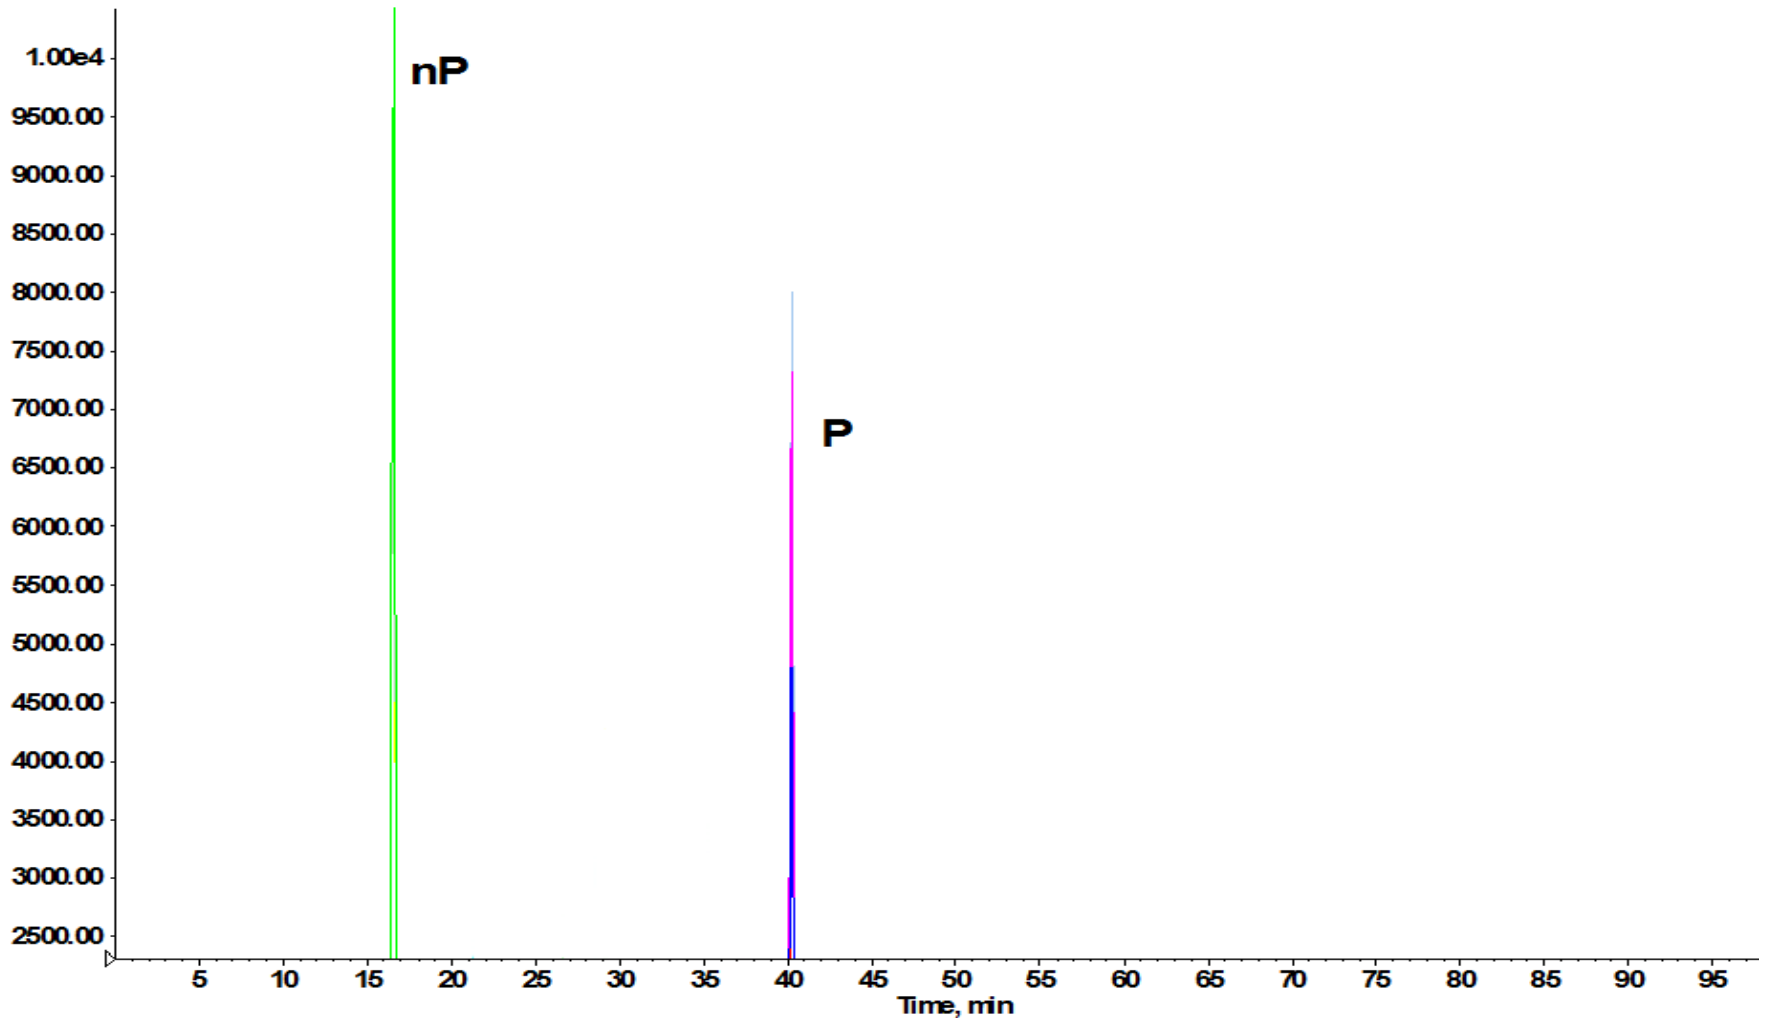

Name: SACE\_5311

TPVTGGTVWR

TPVT[Pho]GGTVWR

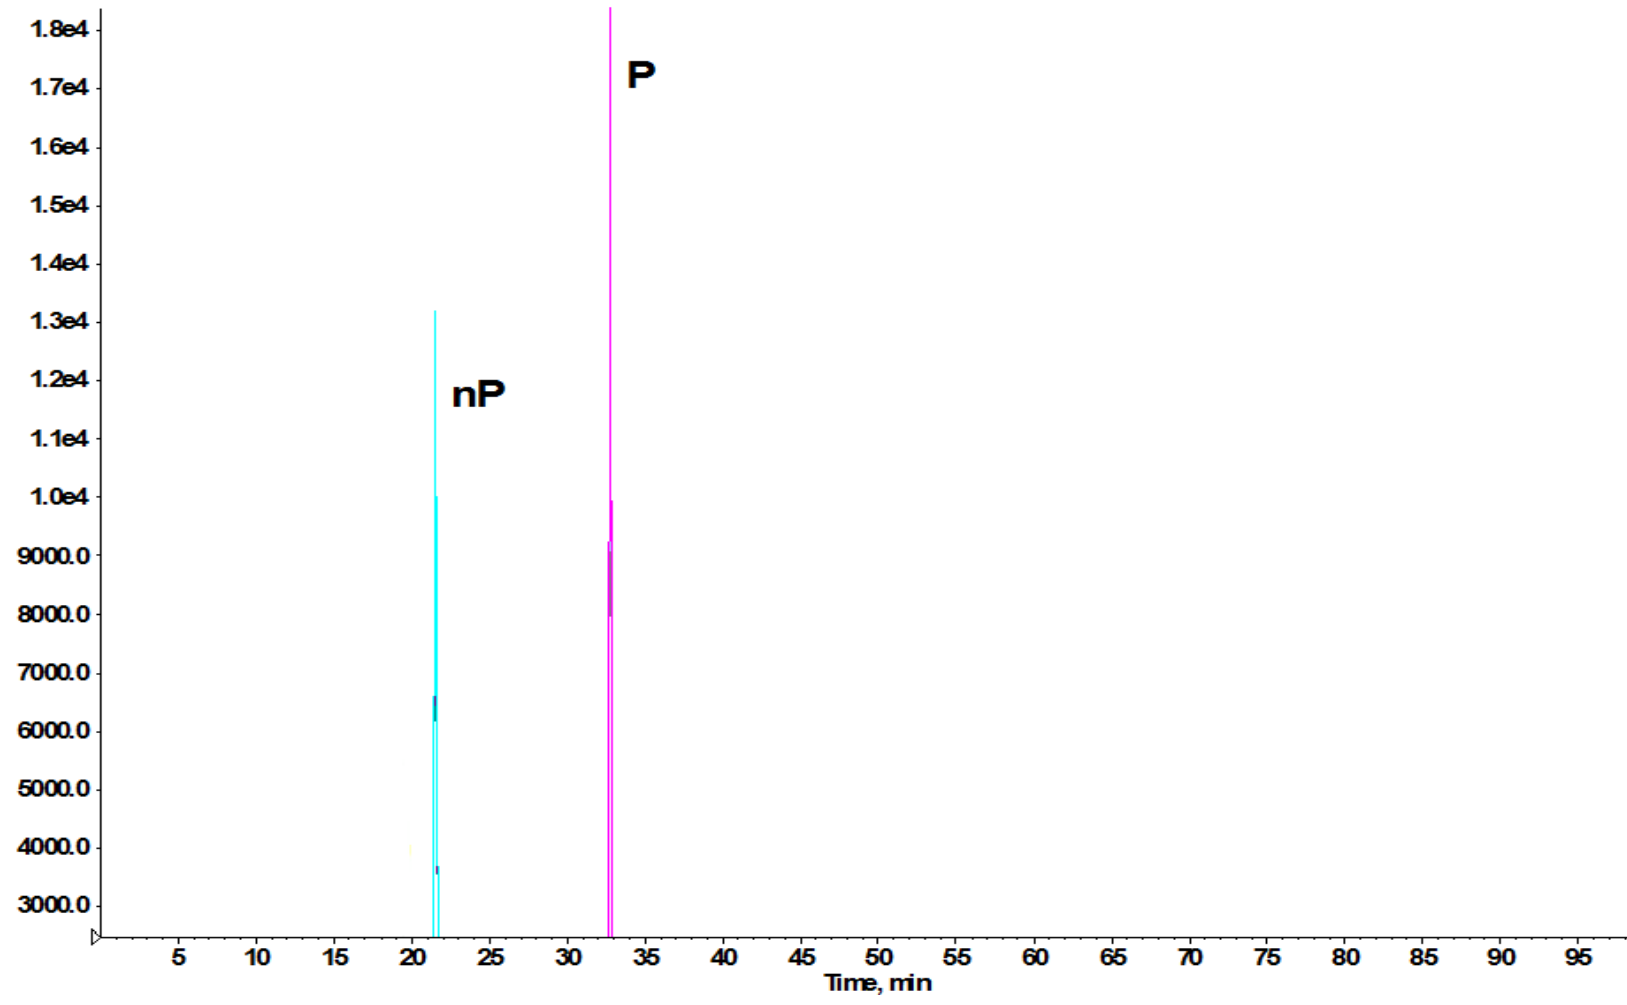

Name: SACE\_5463

ELSEESVLSR

ELS[Pho]EESVLSR

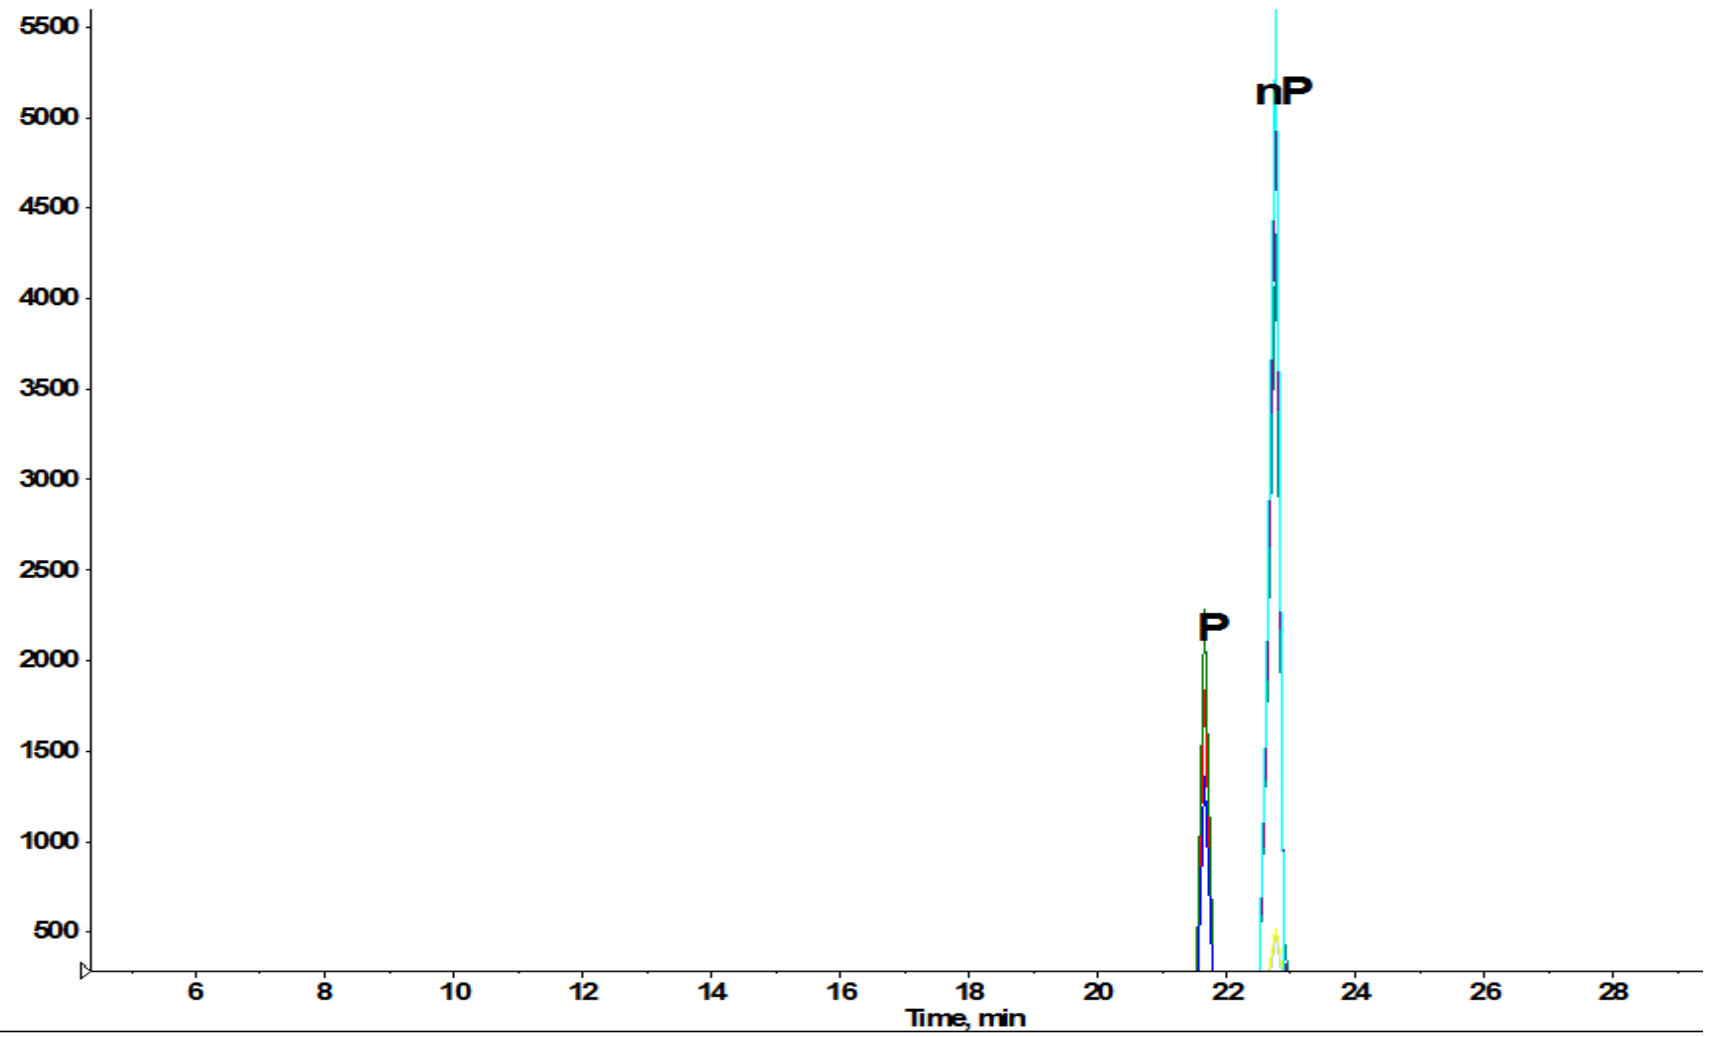

QVELPPYAASGAVGSGK  
QVELPPYAASGAVGS[Pho]GK

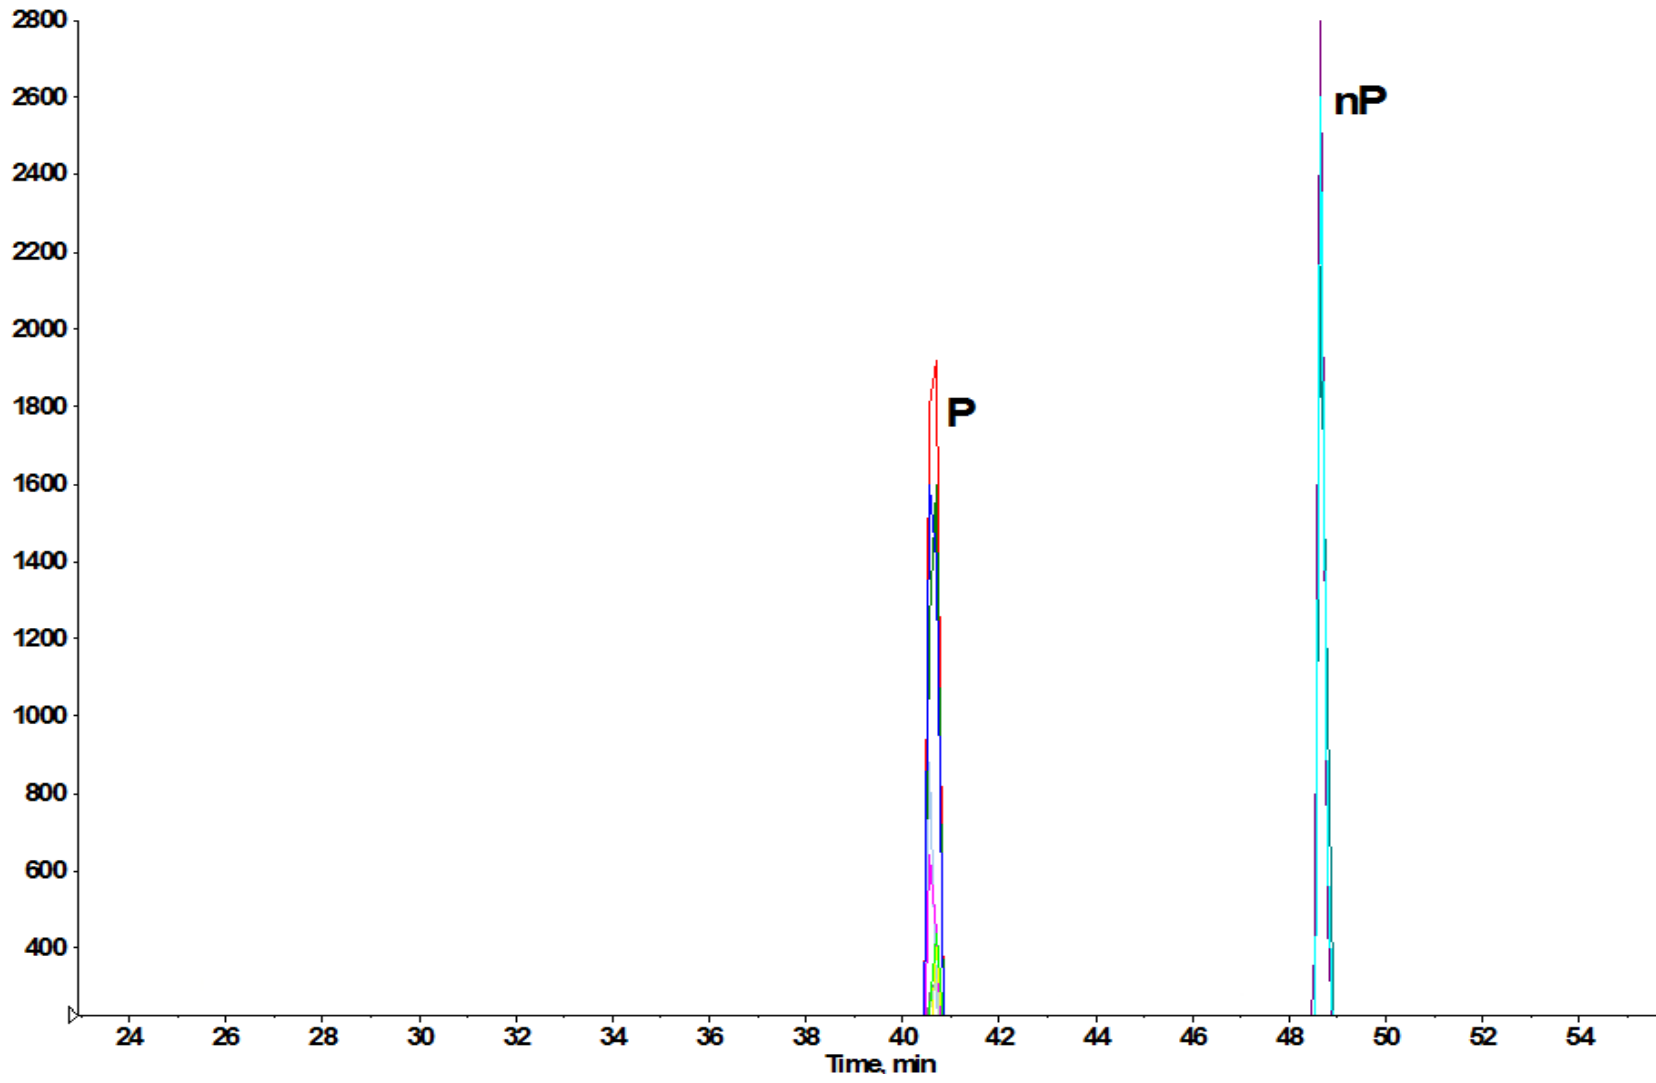

RSGDEHPGAPVAR  
RS[Pho]GDEHPGAPVAR

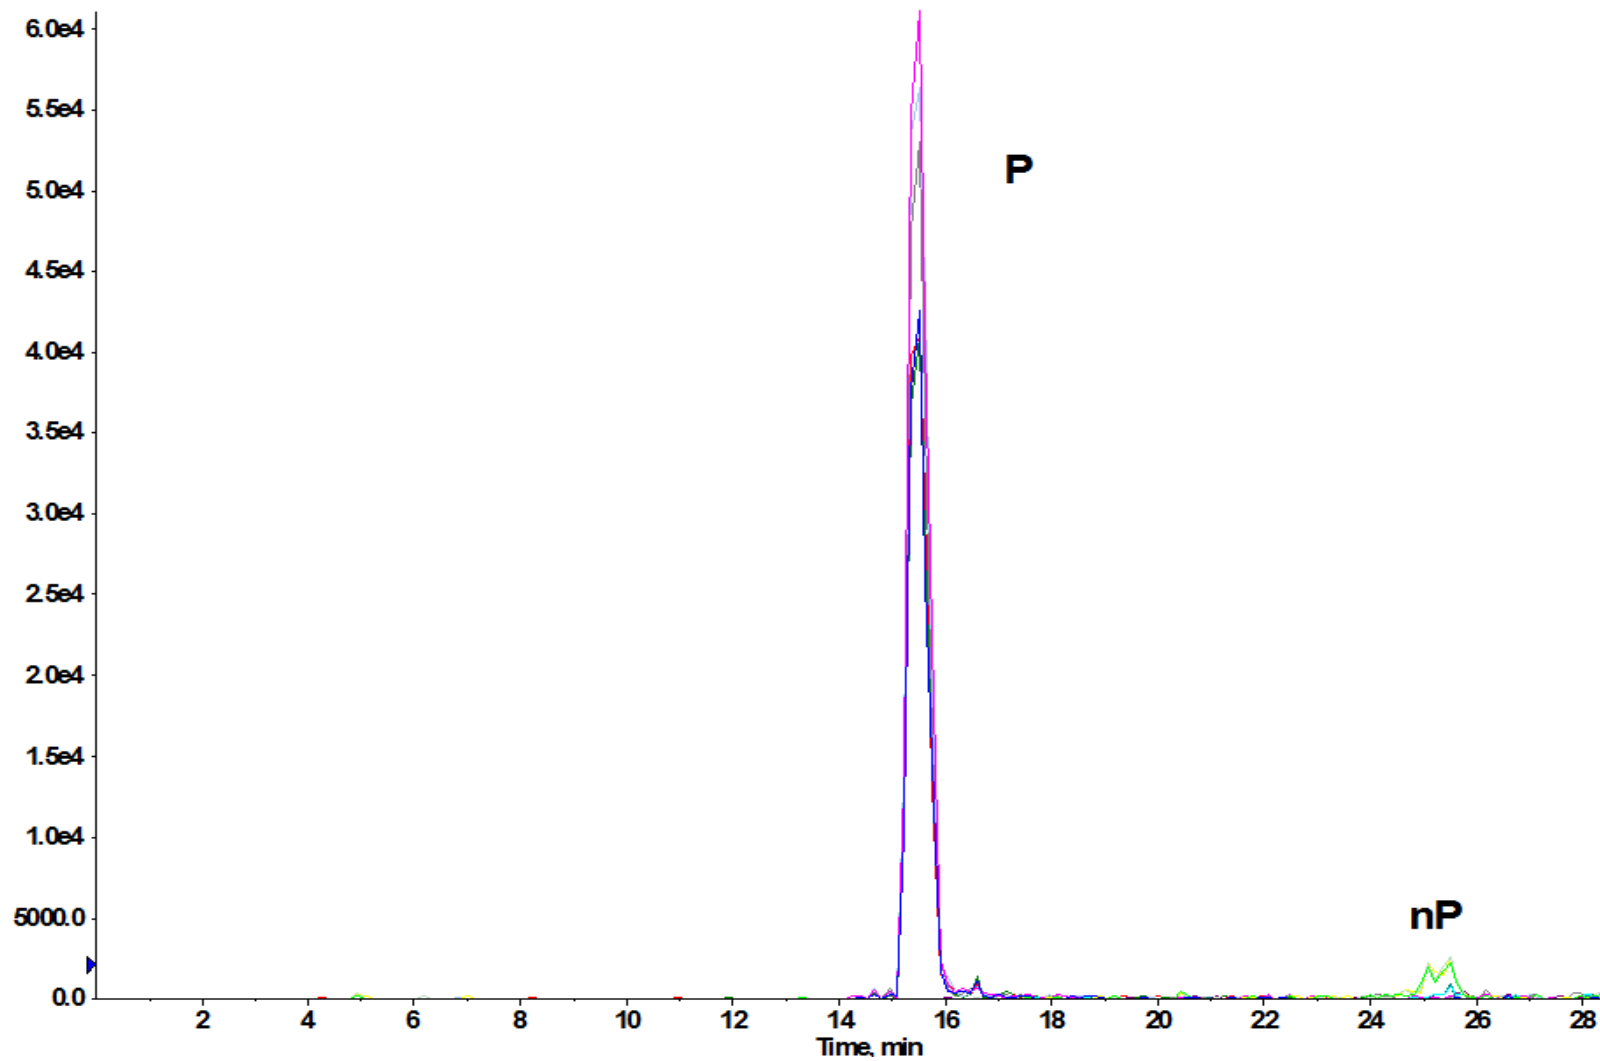



LRNSARTEGVADAR  
LRNS[Pho]vARTEGVADAR

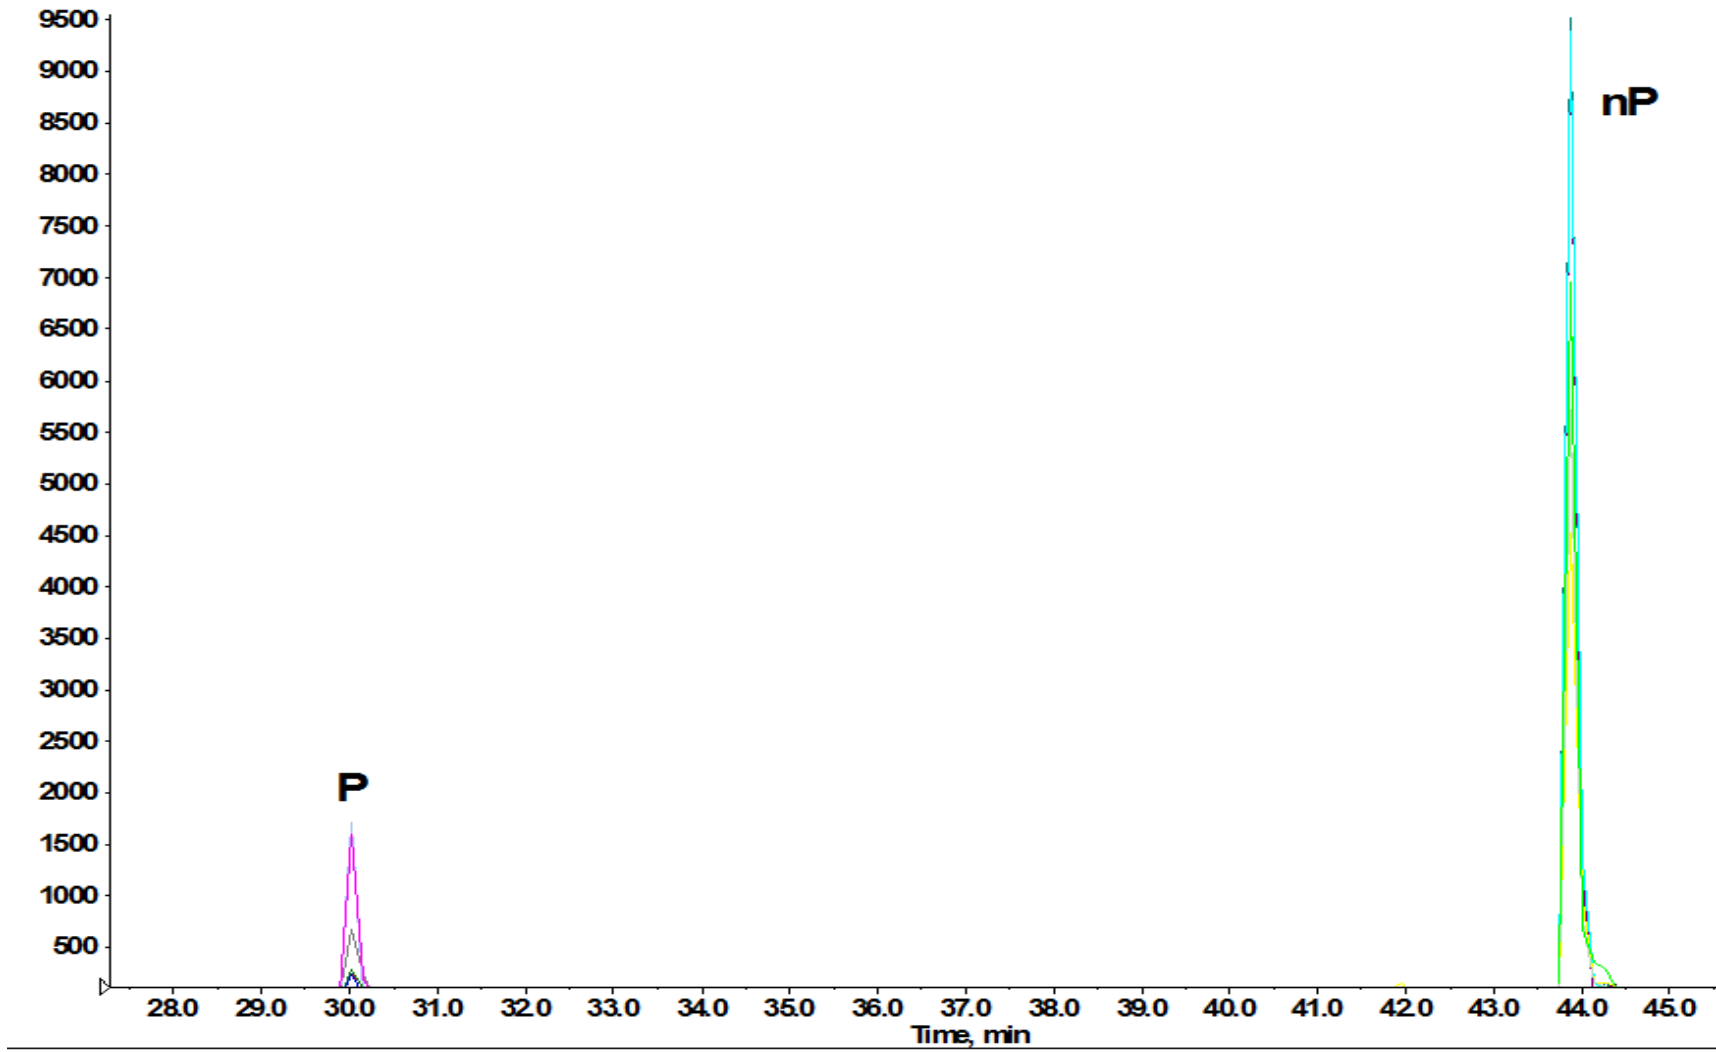

Name: SACE\_5830

LAPVPAPTAAEQTSPGGDHHVQAAK  
LAPVPAPTAAEQT[Pho]SPGGDHHVQAAK

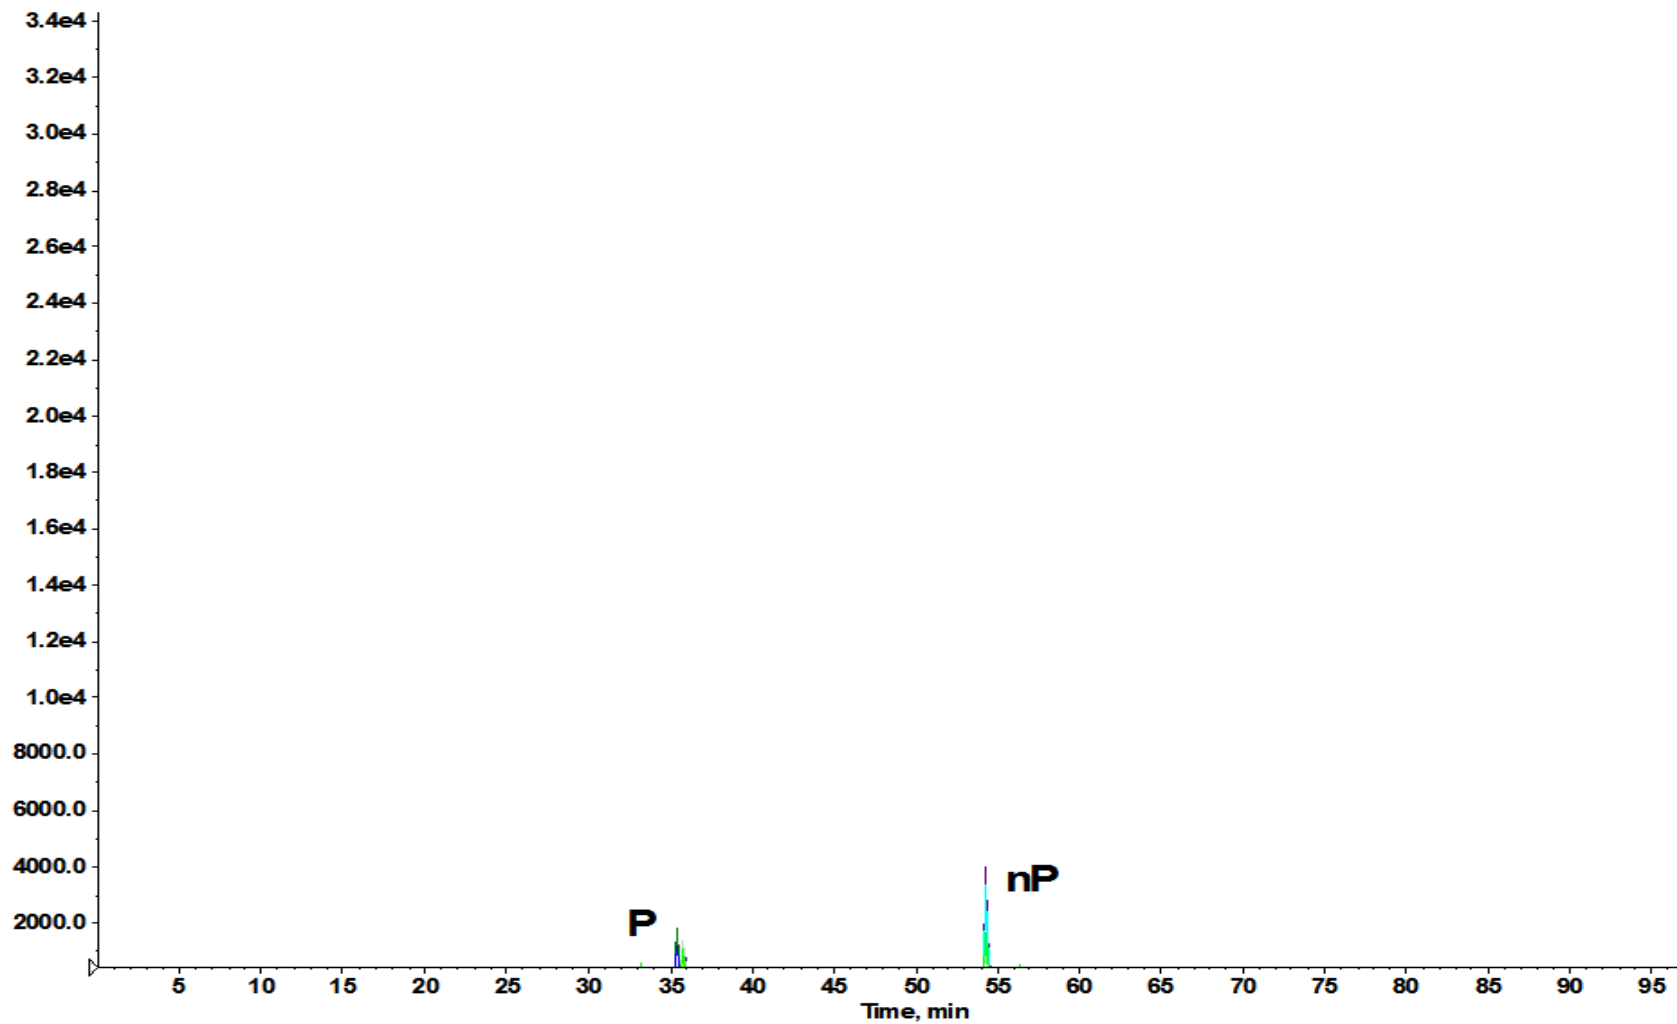

Name: SACE\_6340

VSASTVDISVKSR  
VSAS[Pho]TVDISVKSR

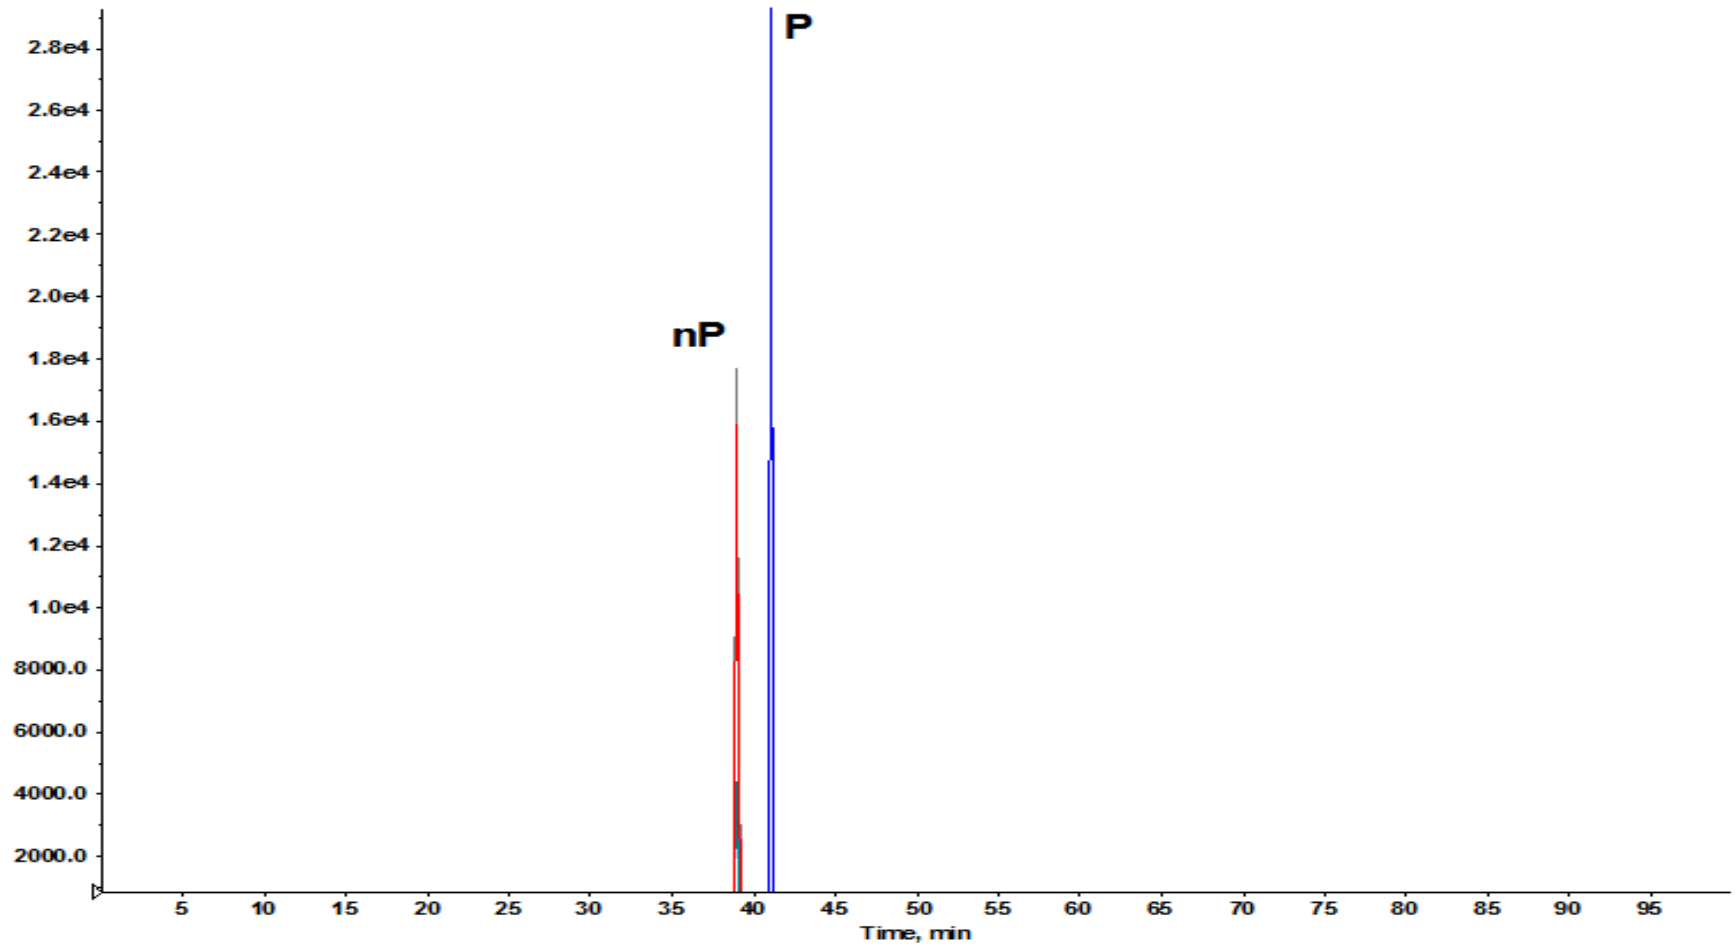

Name: SACE\_7023

AIATRVPK  
AIAT[Pho]RVPK

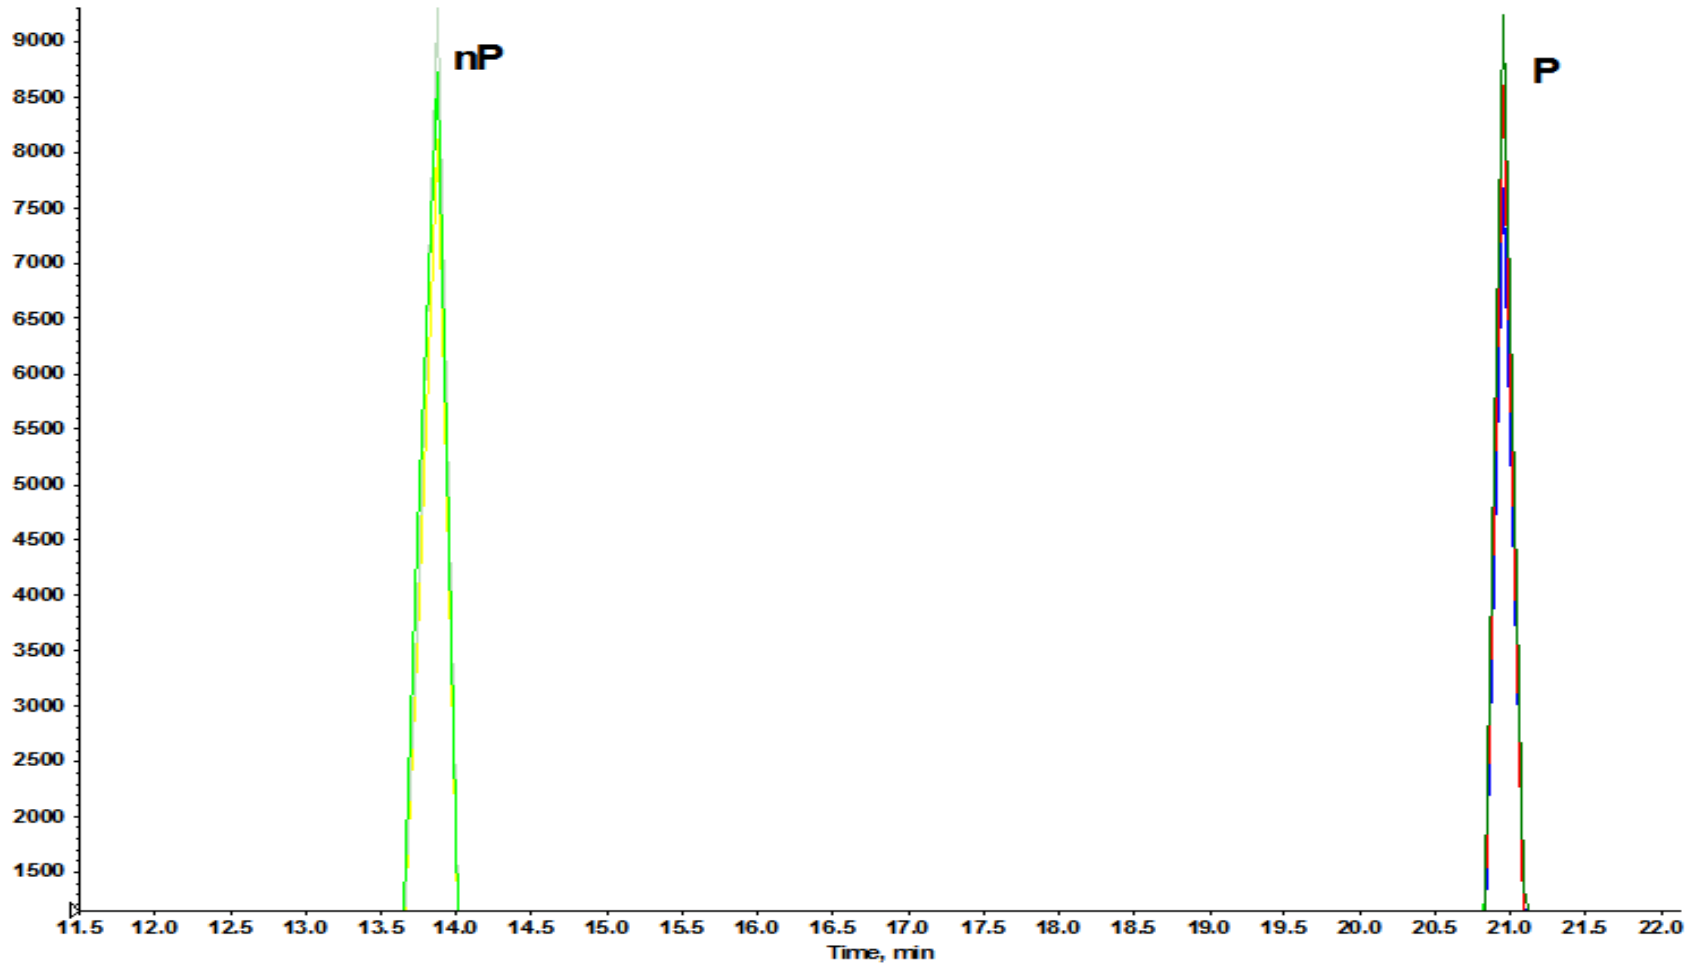

Name: SACE\_4954

EIARFLGRAASTISR  
EIARFLGRAAS[Pho]T[Pho]ISR

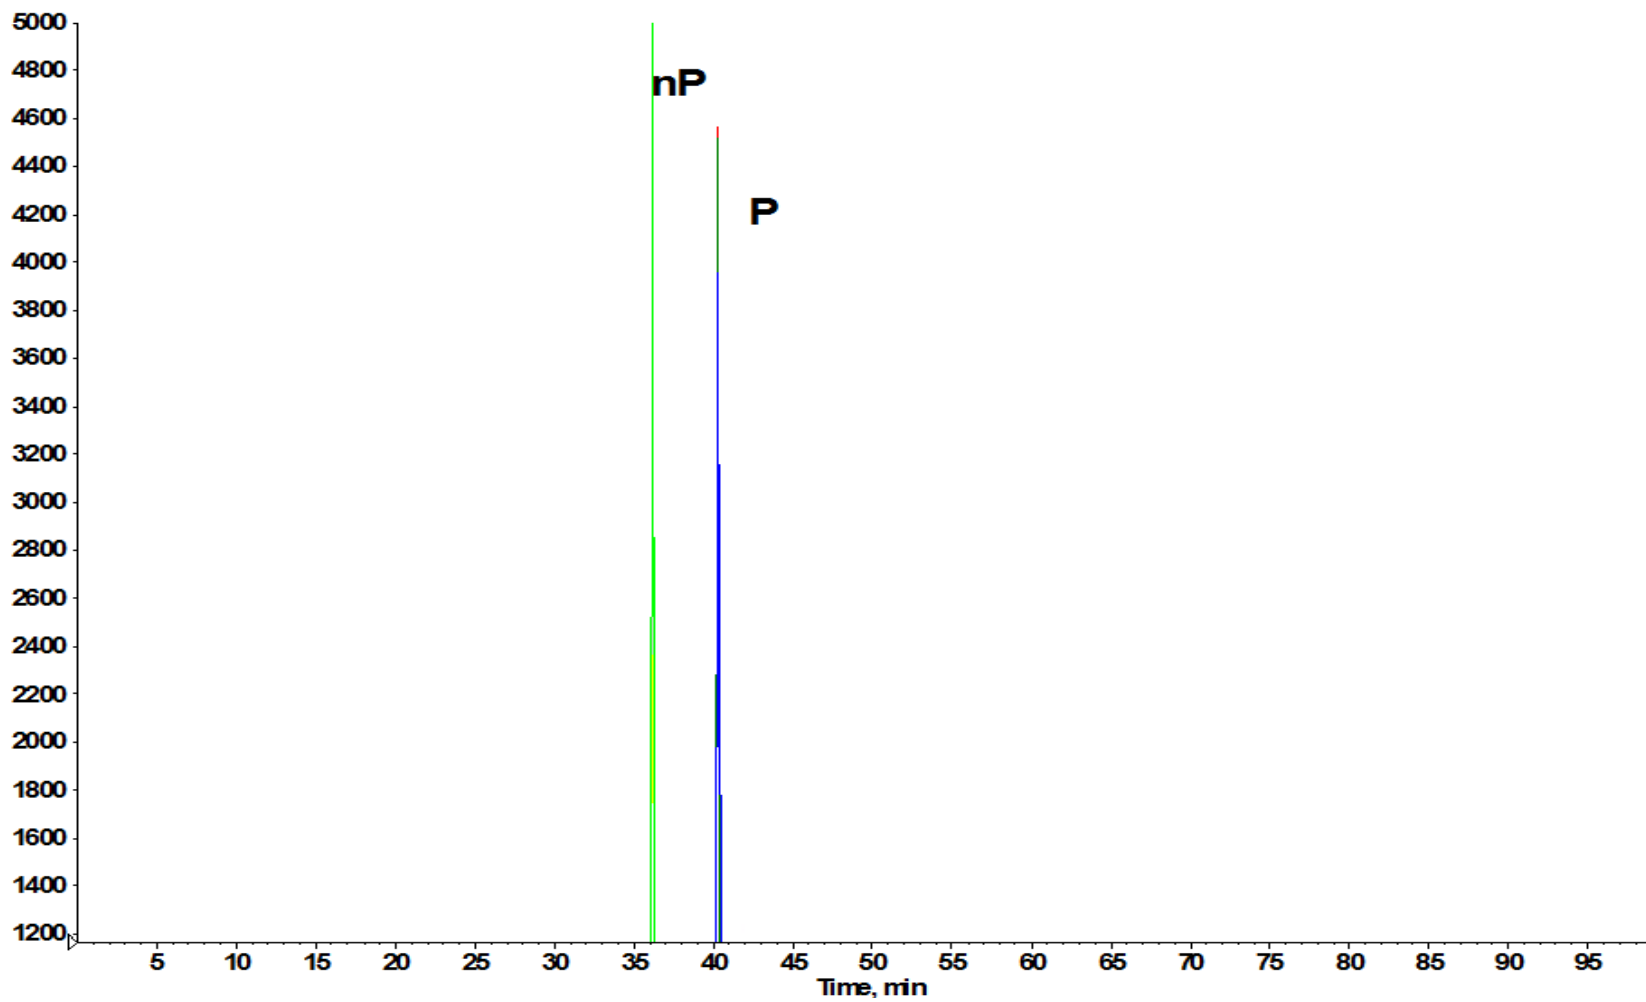

Name: SACE\_3651

EKLRTLPK  
EKLRT[Pho]LPK

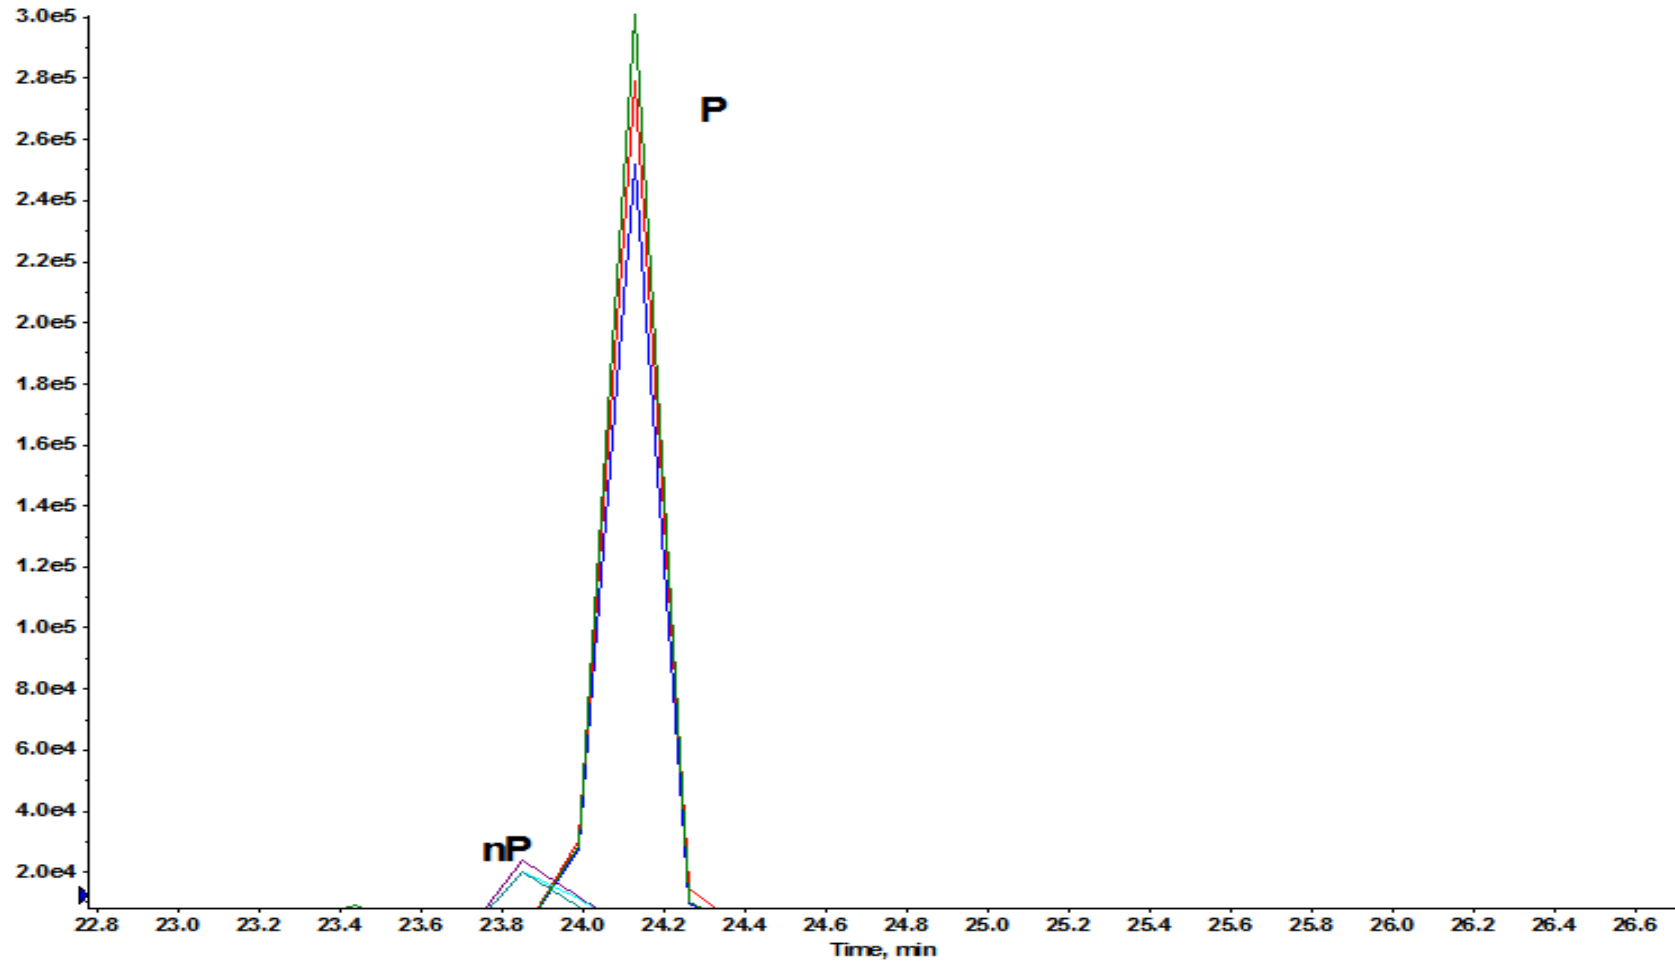

Name: SACE\_4291

ELSDLDILLHRPPGVVGLLTGSAGIGK  
ELS[Pho]DLDILLHRPPGVVGLLTGSAGIGK

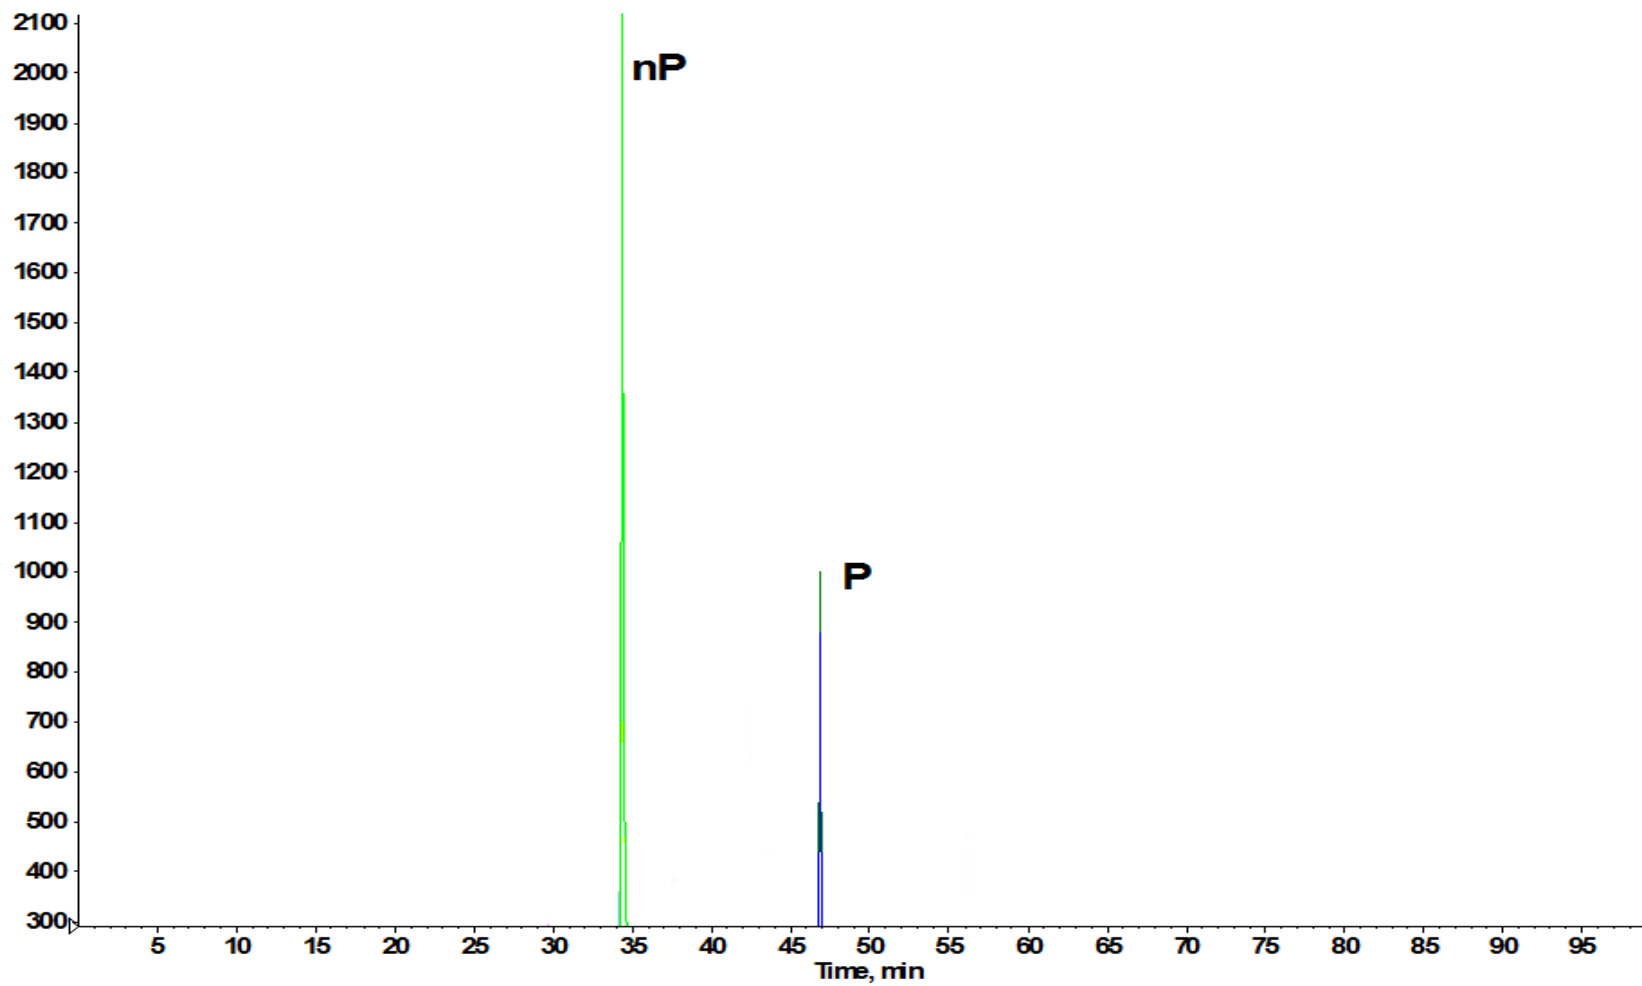

Name: SACE\_6494

GGPGFQGQPGPQGPPAGYQGHGHNPHSGR  
GGPGFQGQPGPQGPPAGYQGHGHNPHS[Pho]GR

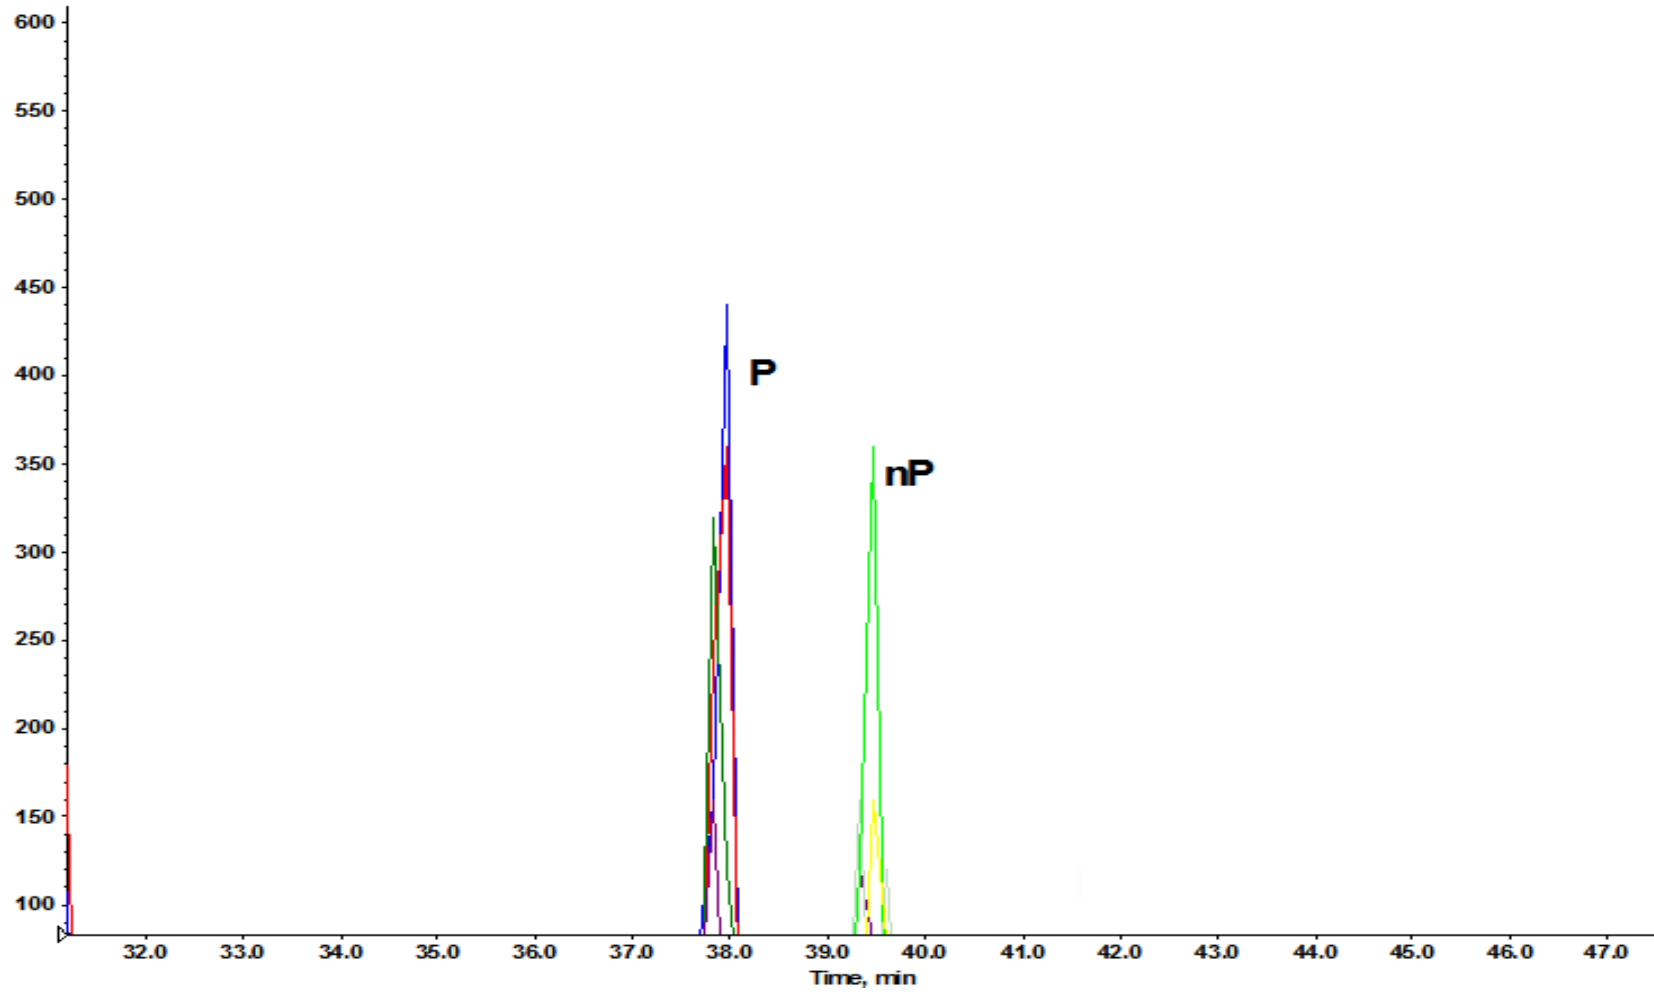



Name: SACE\_2595

GGSSALLALAR

GGSS[Pho]ALLALAR

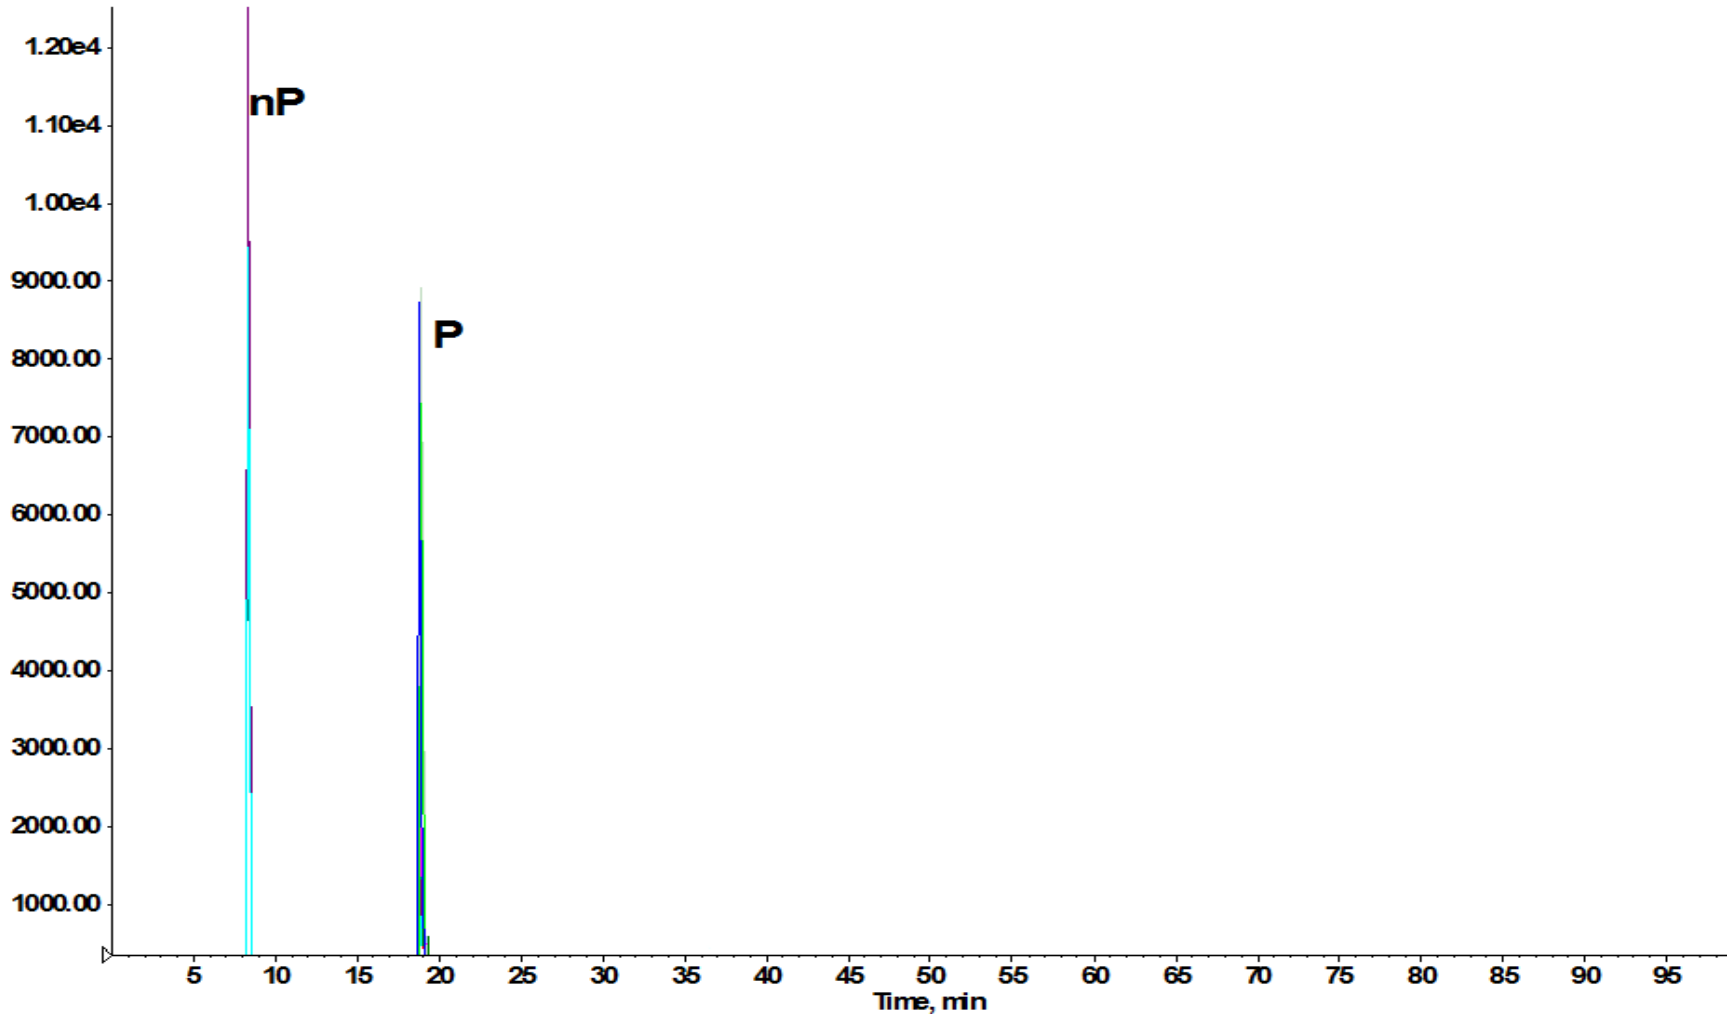

Name: SACE\_5209

GRTVGATVVGAAGSAAKVEK  
GRT[Pho]VGATVVGAAGSAAKVEK

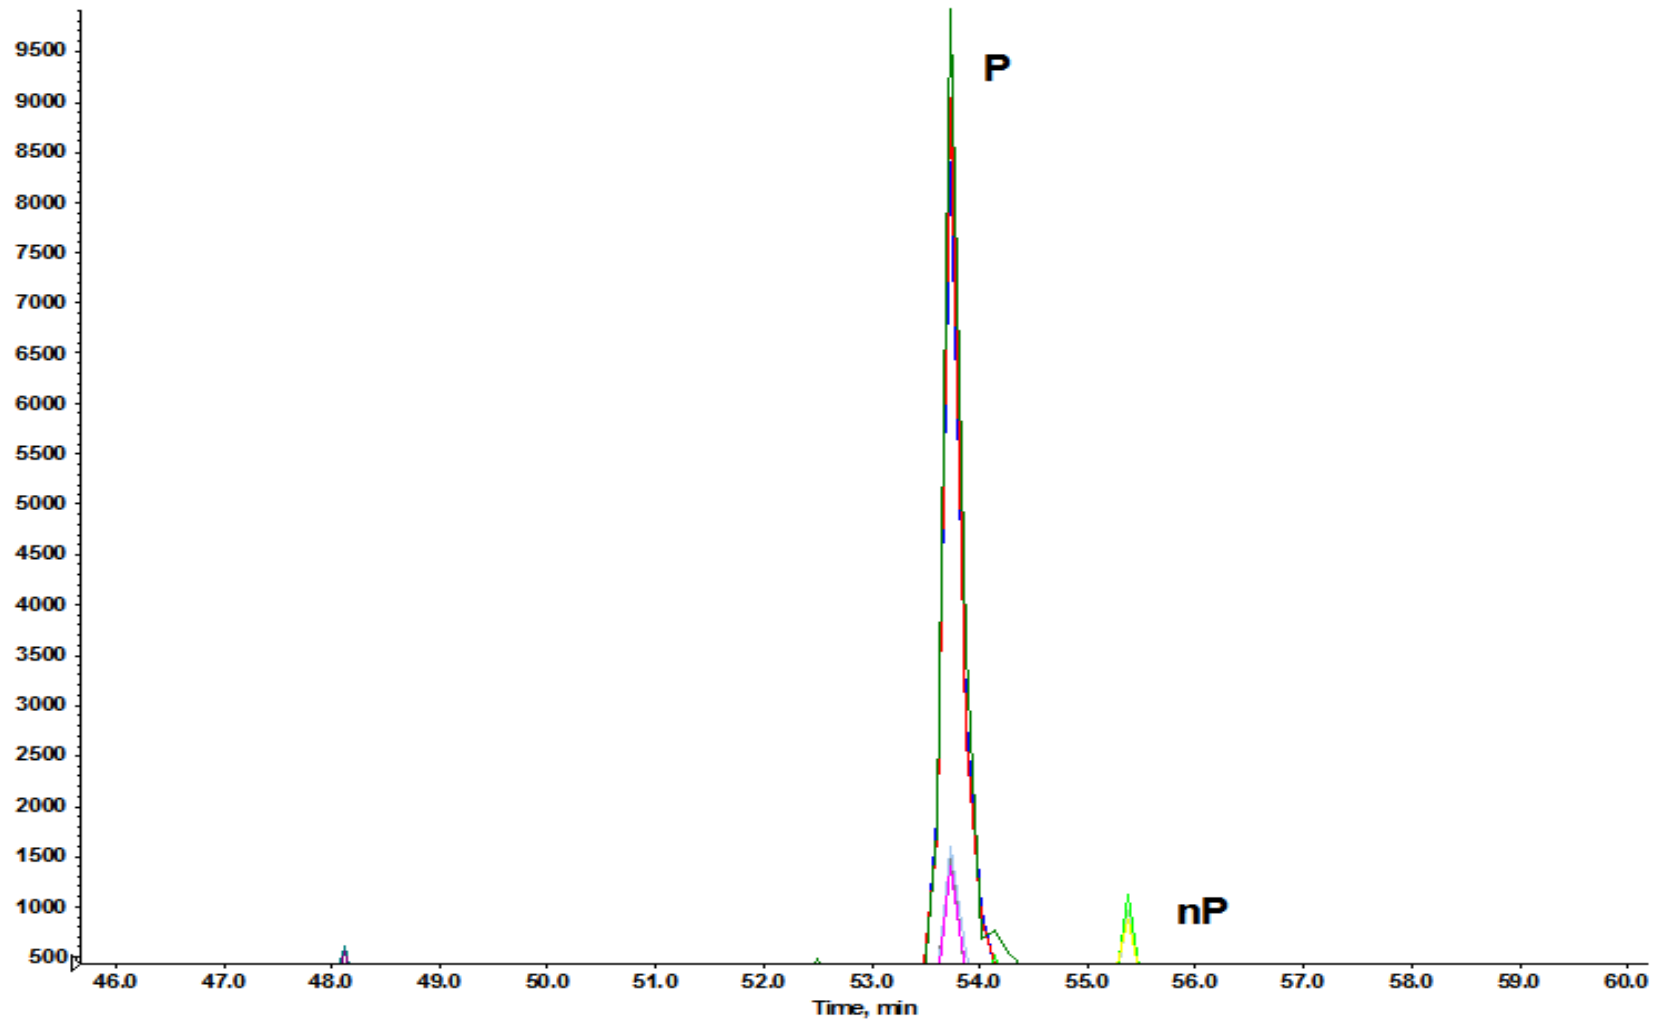

Name: SACE\_6451

GTDSIGGAVSTWNR  
GT[Pho]DSIGGAVSTWNR

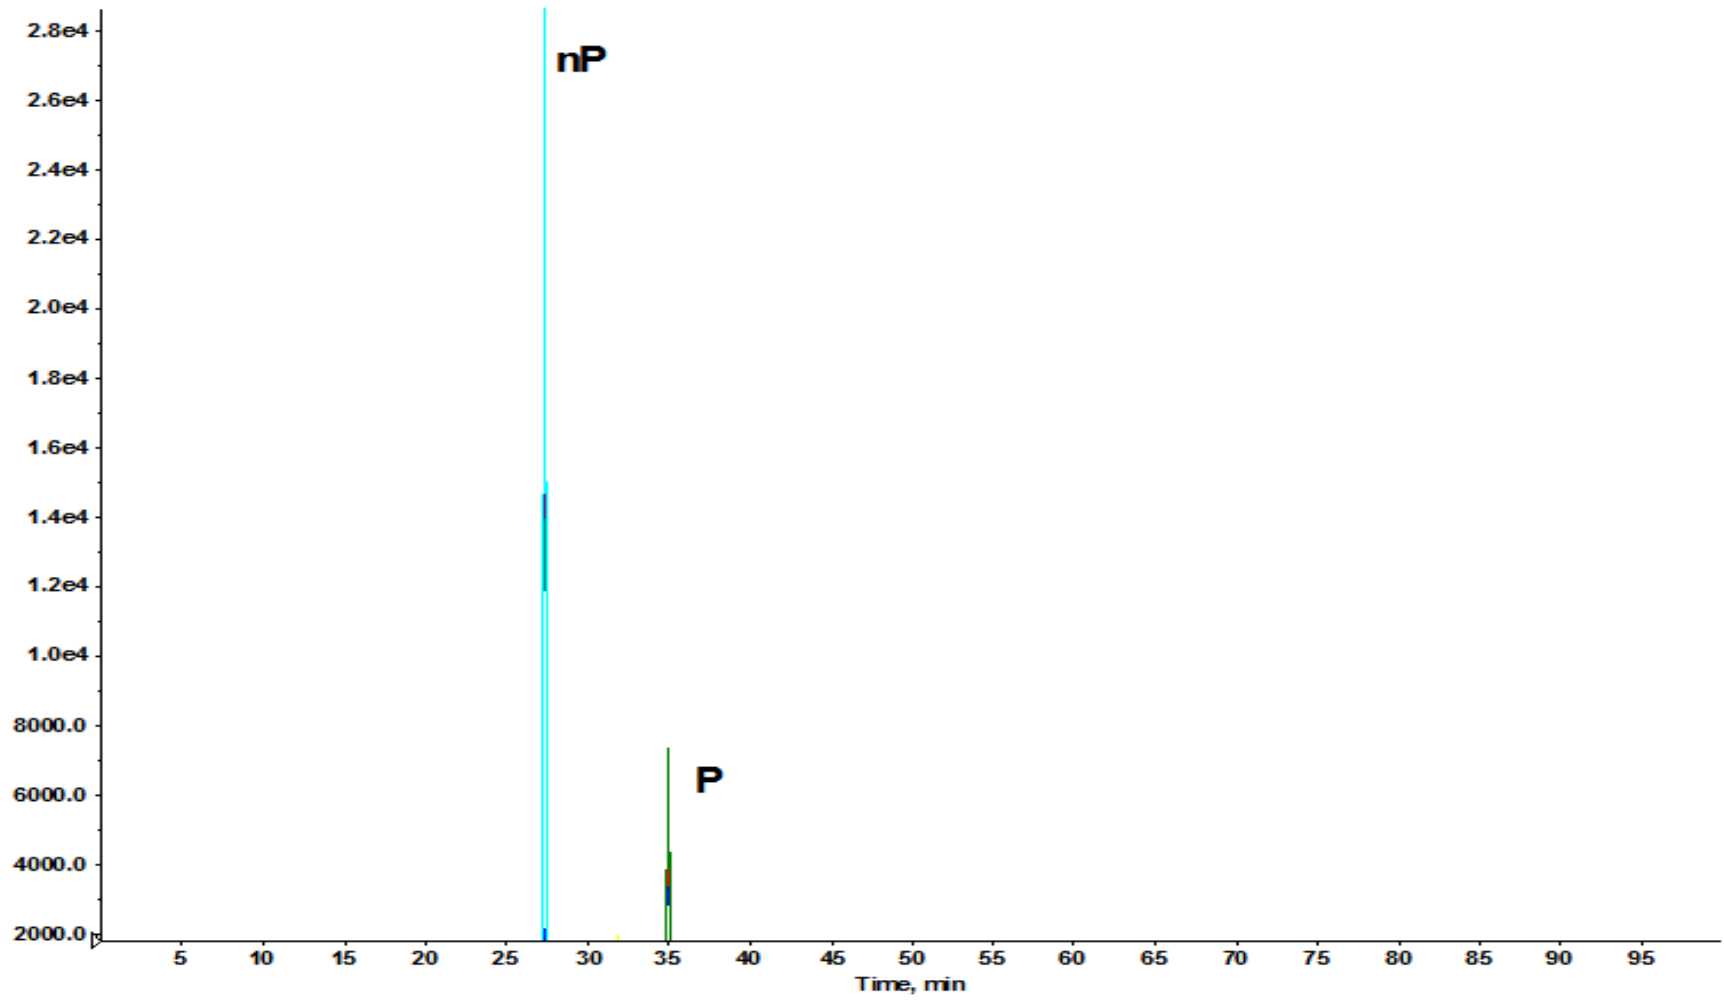

Name: SACE\_3279

HATLEAGRKFYSDVK  
HAT[Pho]LEAGRKFYSDVK

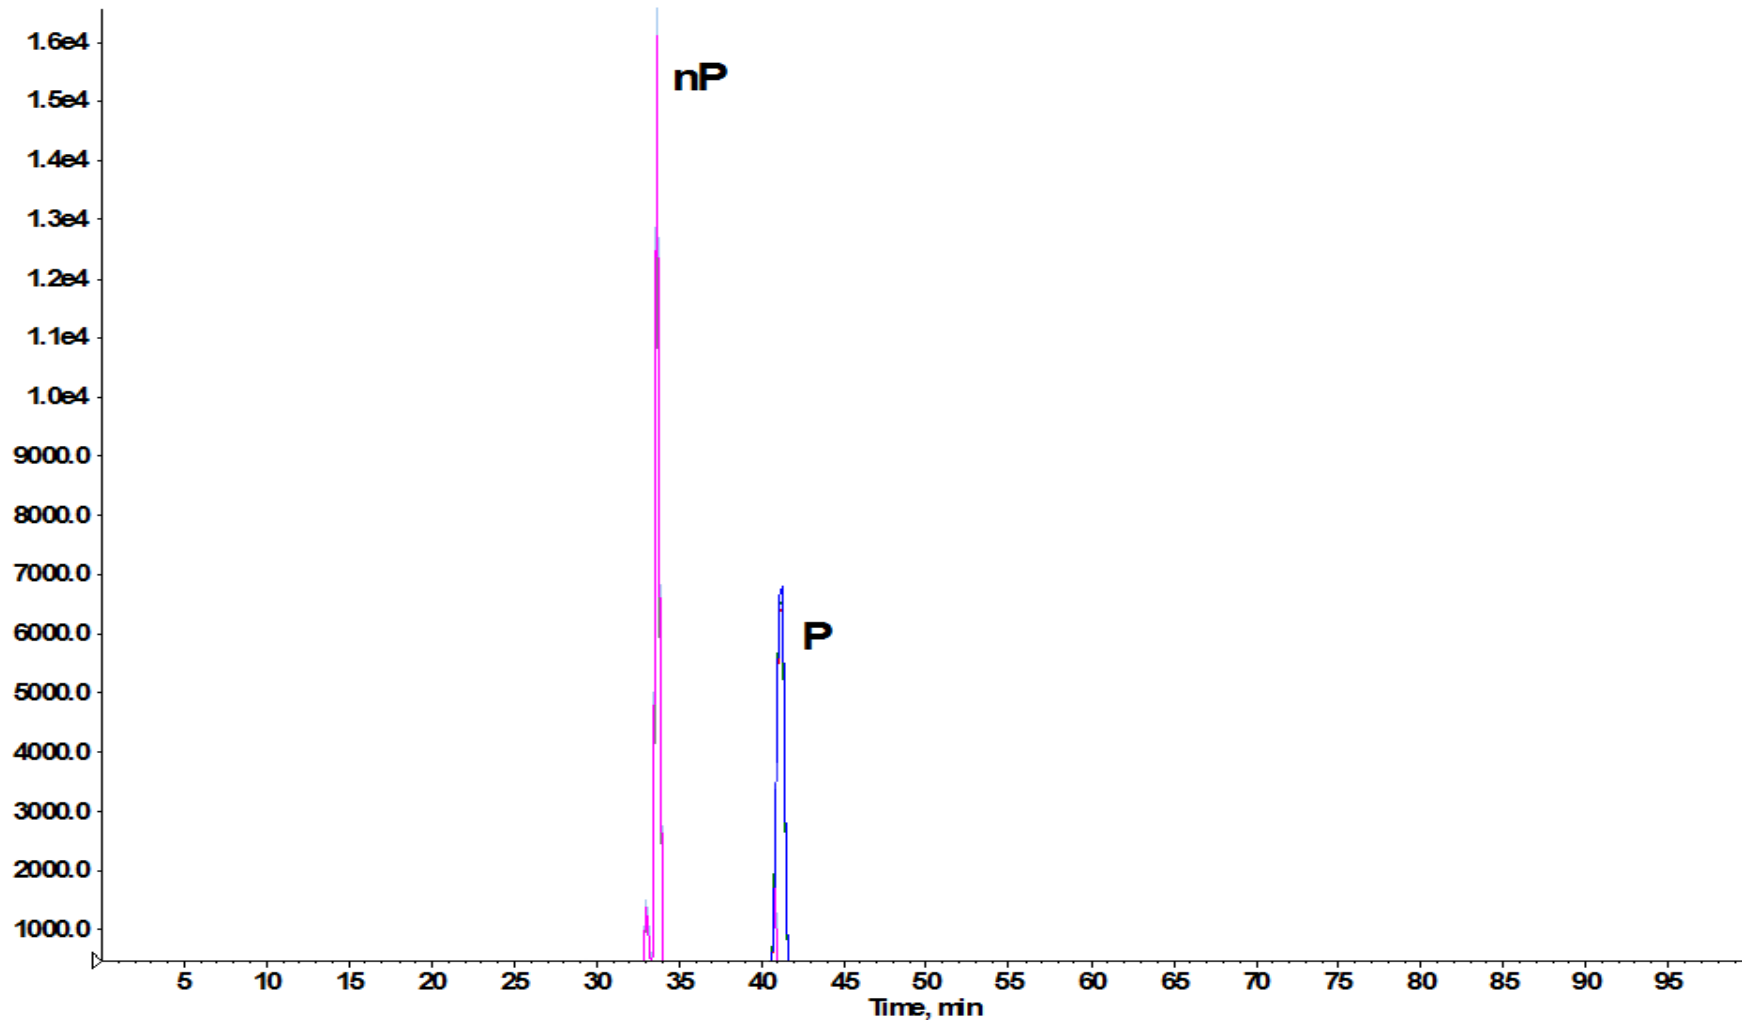

Name: SACE\_6101

KMSRANTRHR

KMS[Pho]RANTRHR

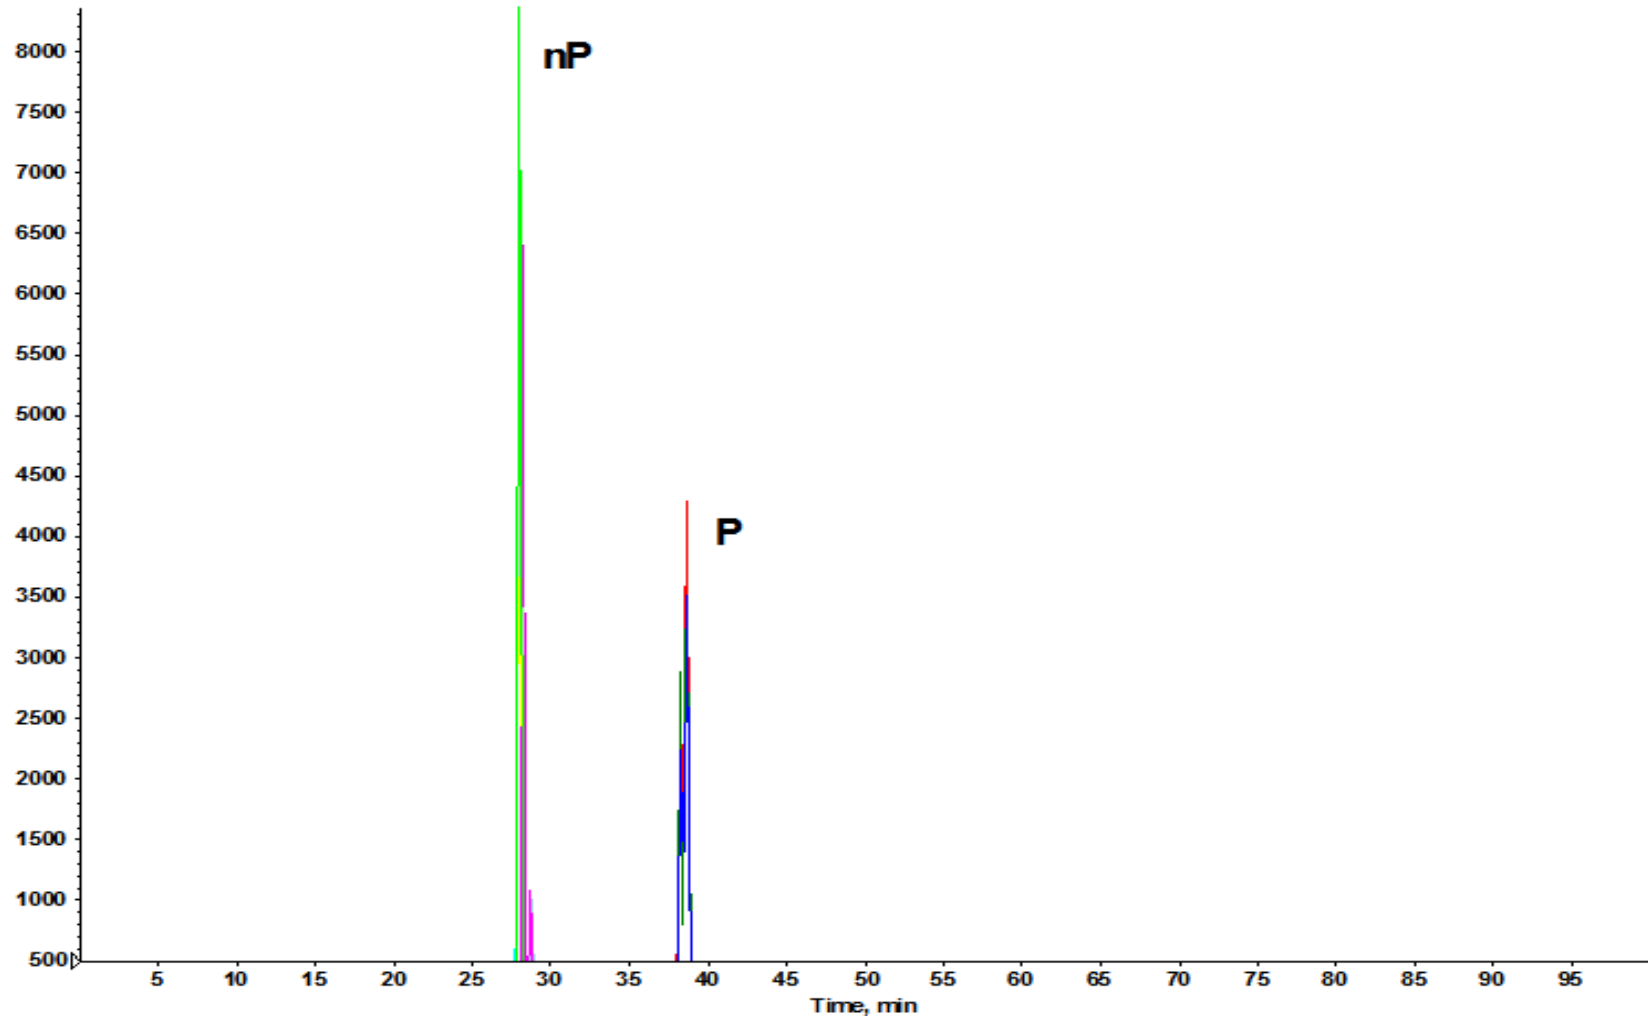

Name: SACE\_1524

NEEITGLAAIVEEVAGVDADDVTVDK

NEEITT[Pho]GLAAIVEEVAGVDADDVTVDK

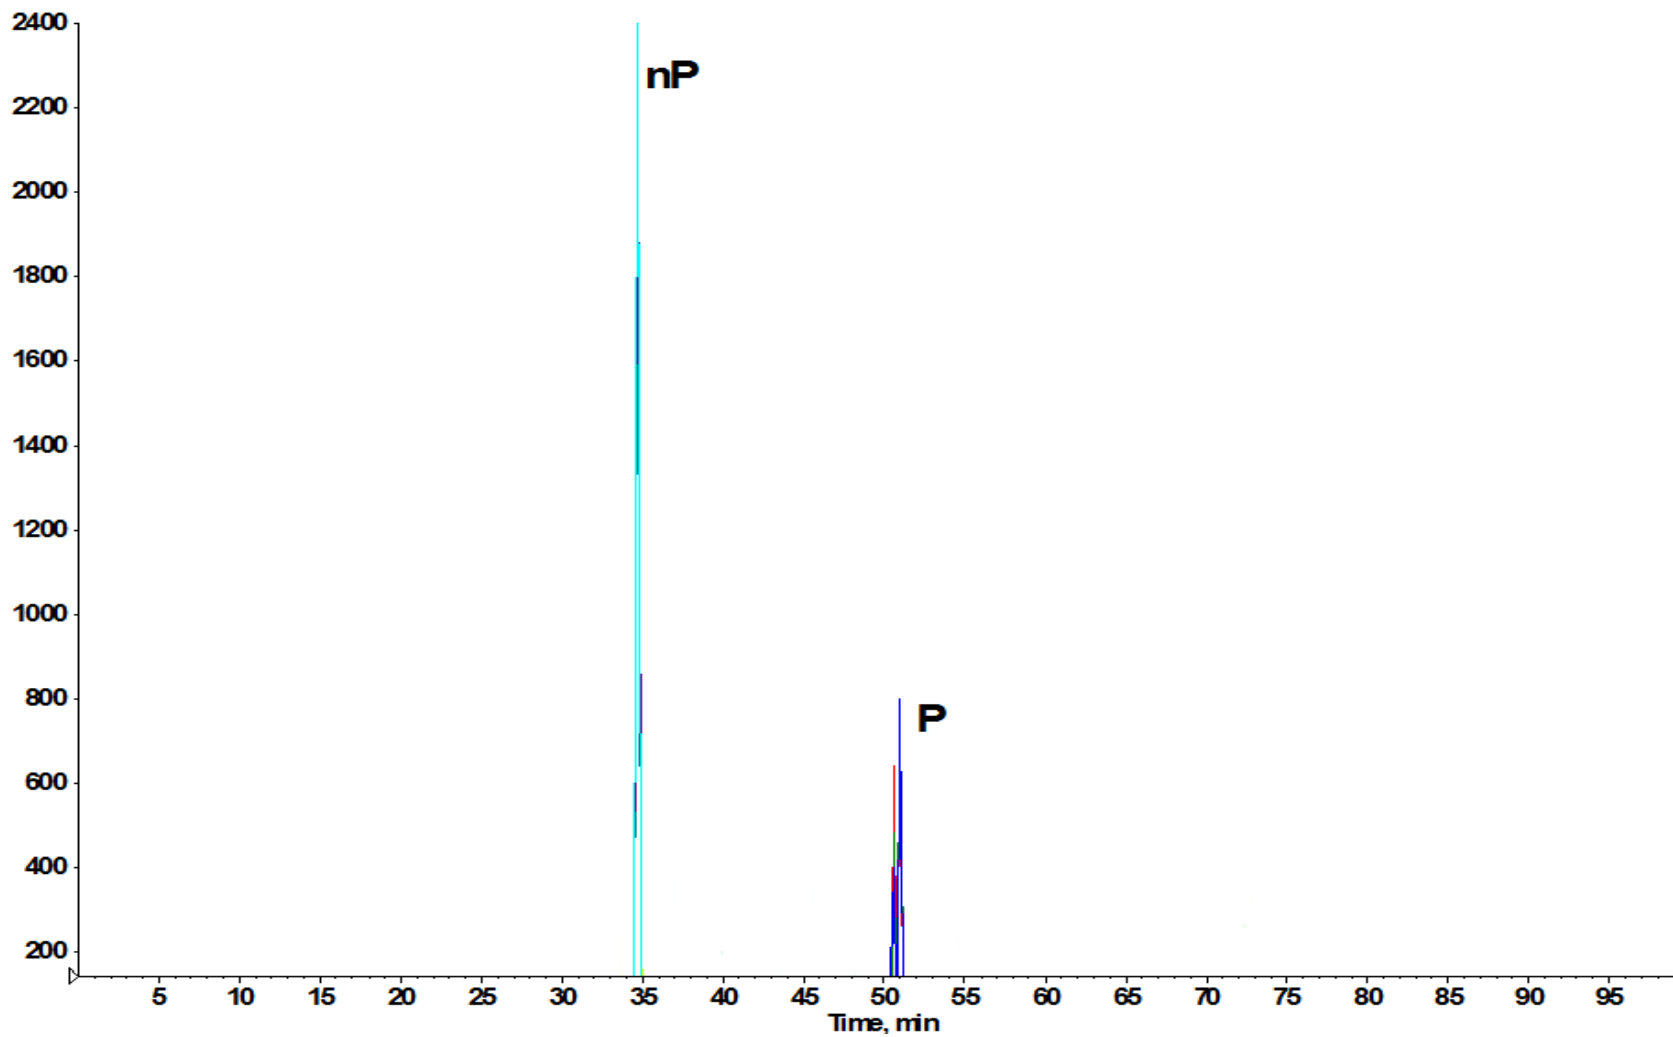

Name: SACE\_2043

TGETDRPIDLHMPSR  
TGETDRPIDLHMPS[Pho]PR

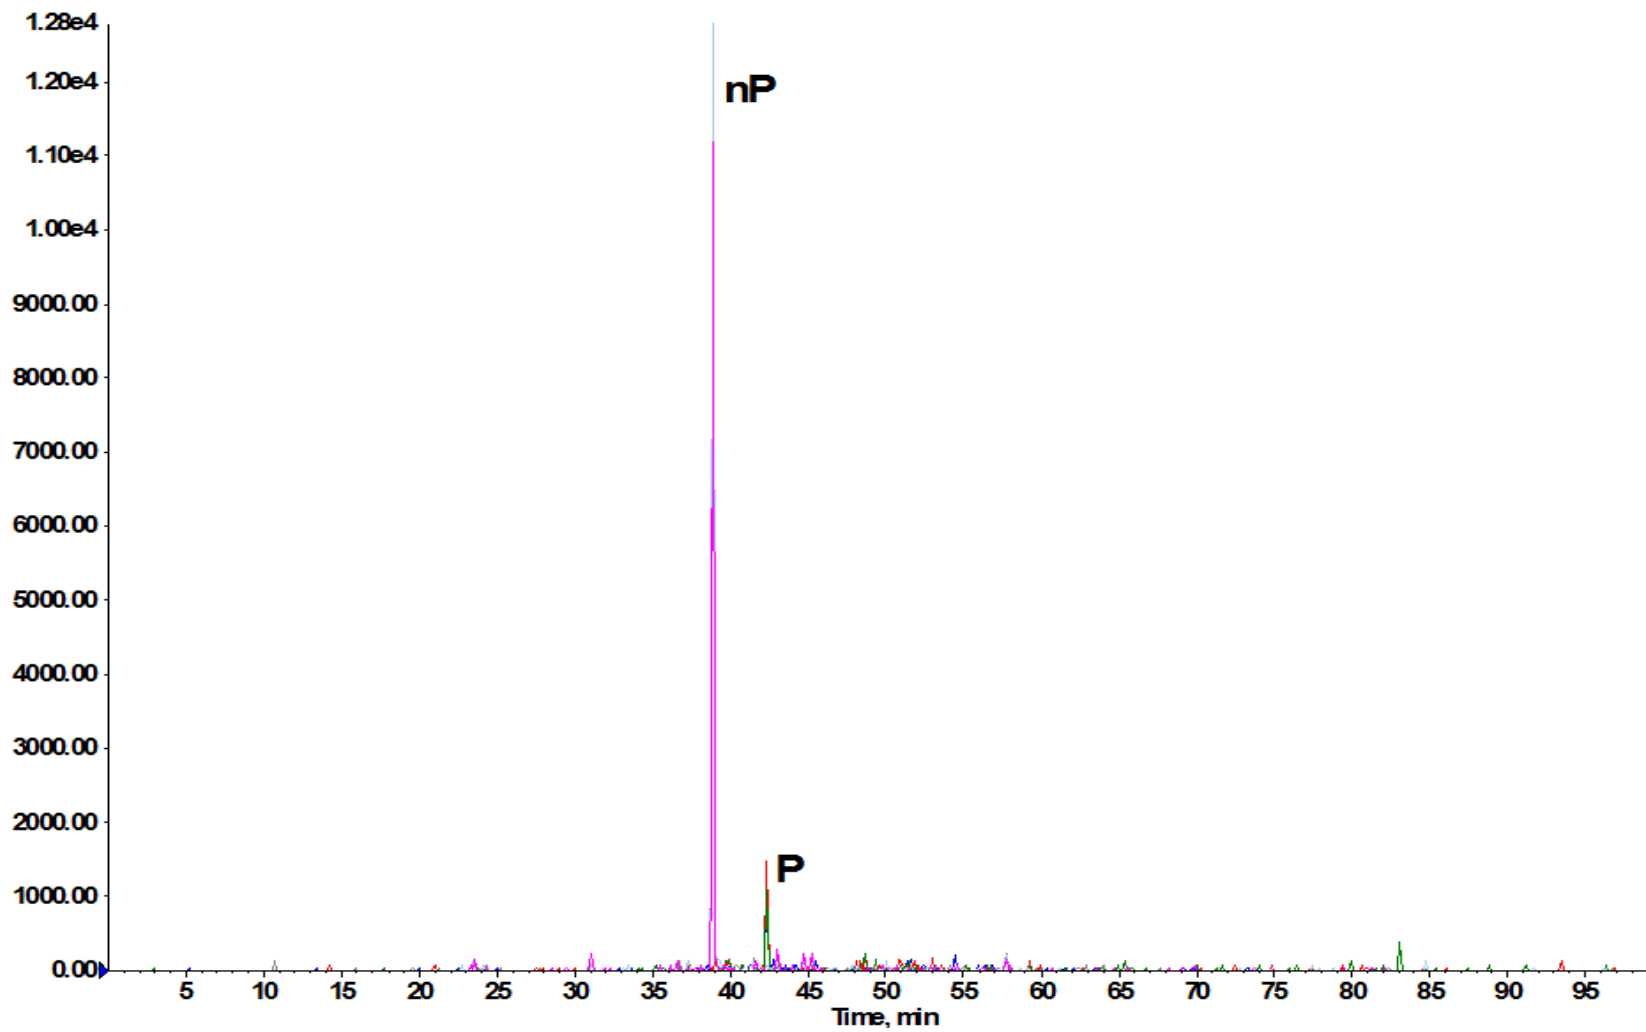

Name: SACE\_6140

TSGDSPIVNALIDAAEAGK

TSGDS[Pho]PIVNALIDAAEAGK

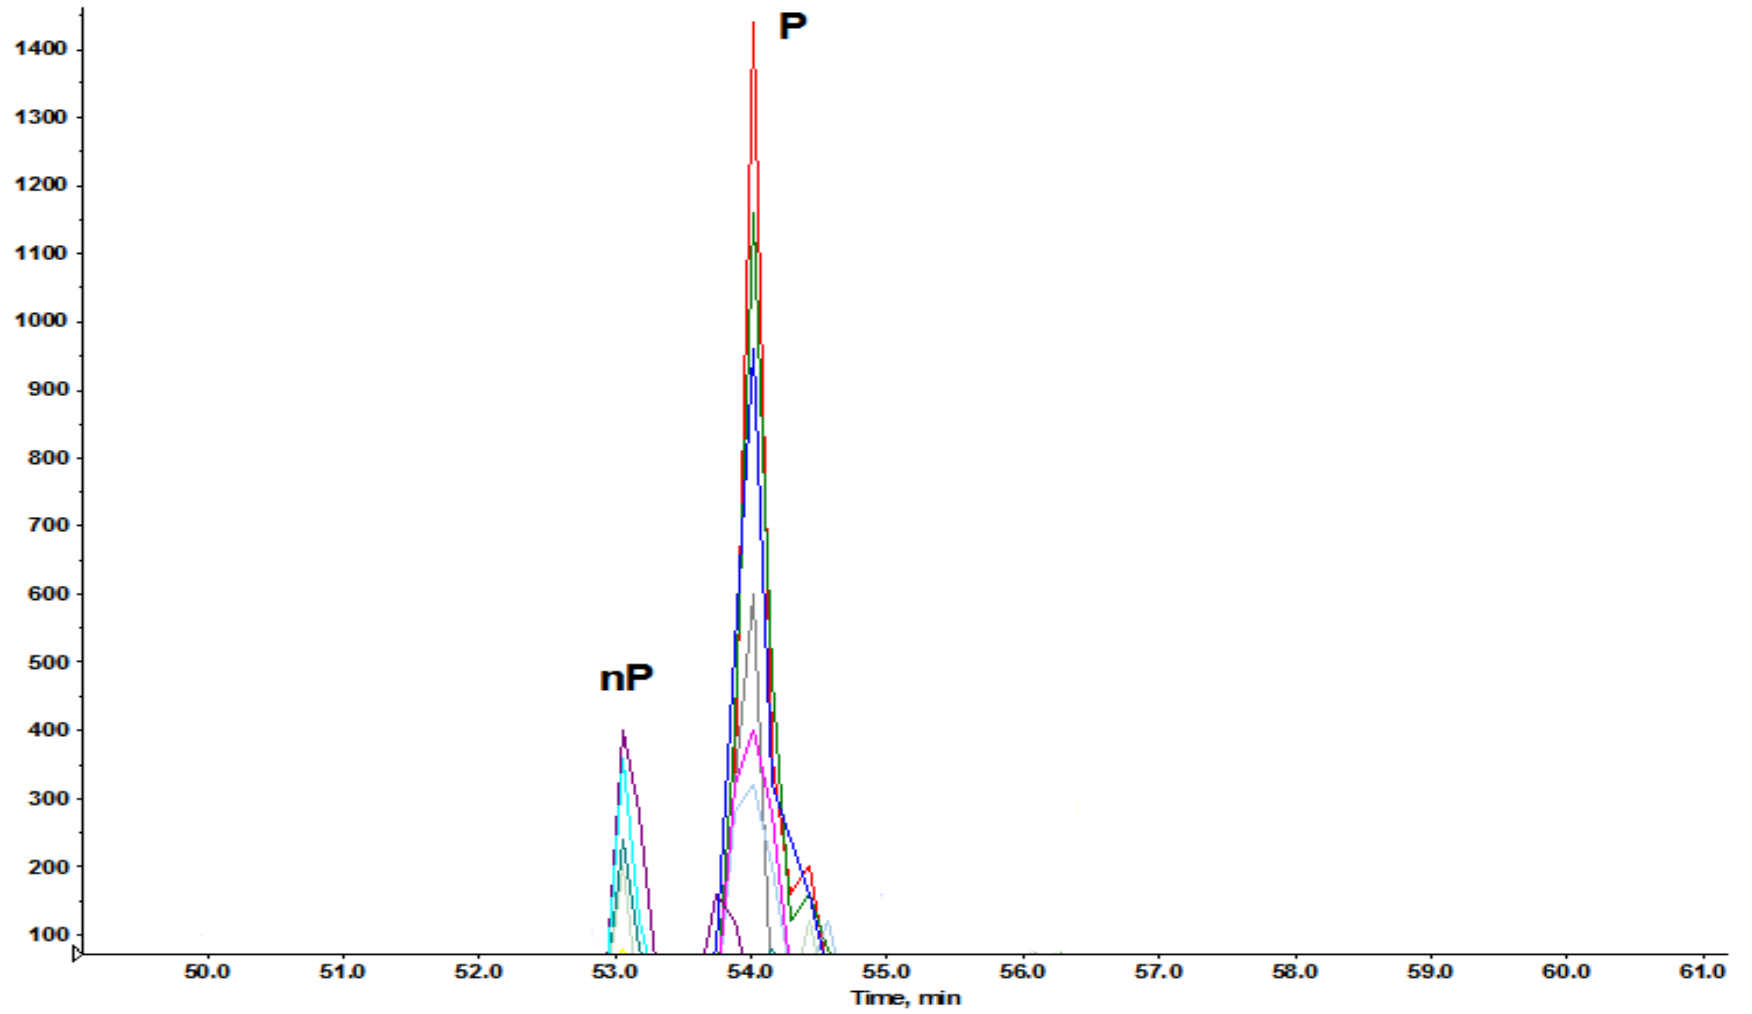



Name: SACE\_3899

VSGTKHTAR  
VSGT[Pho]KHTAR

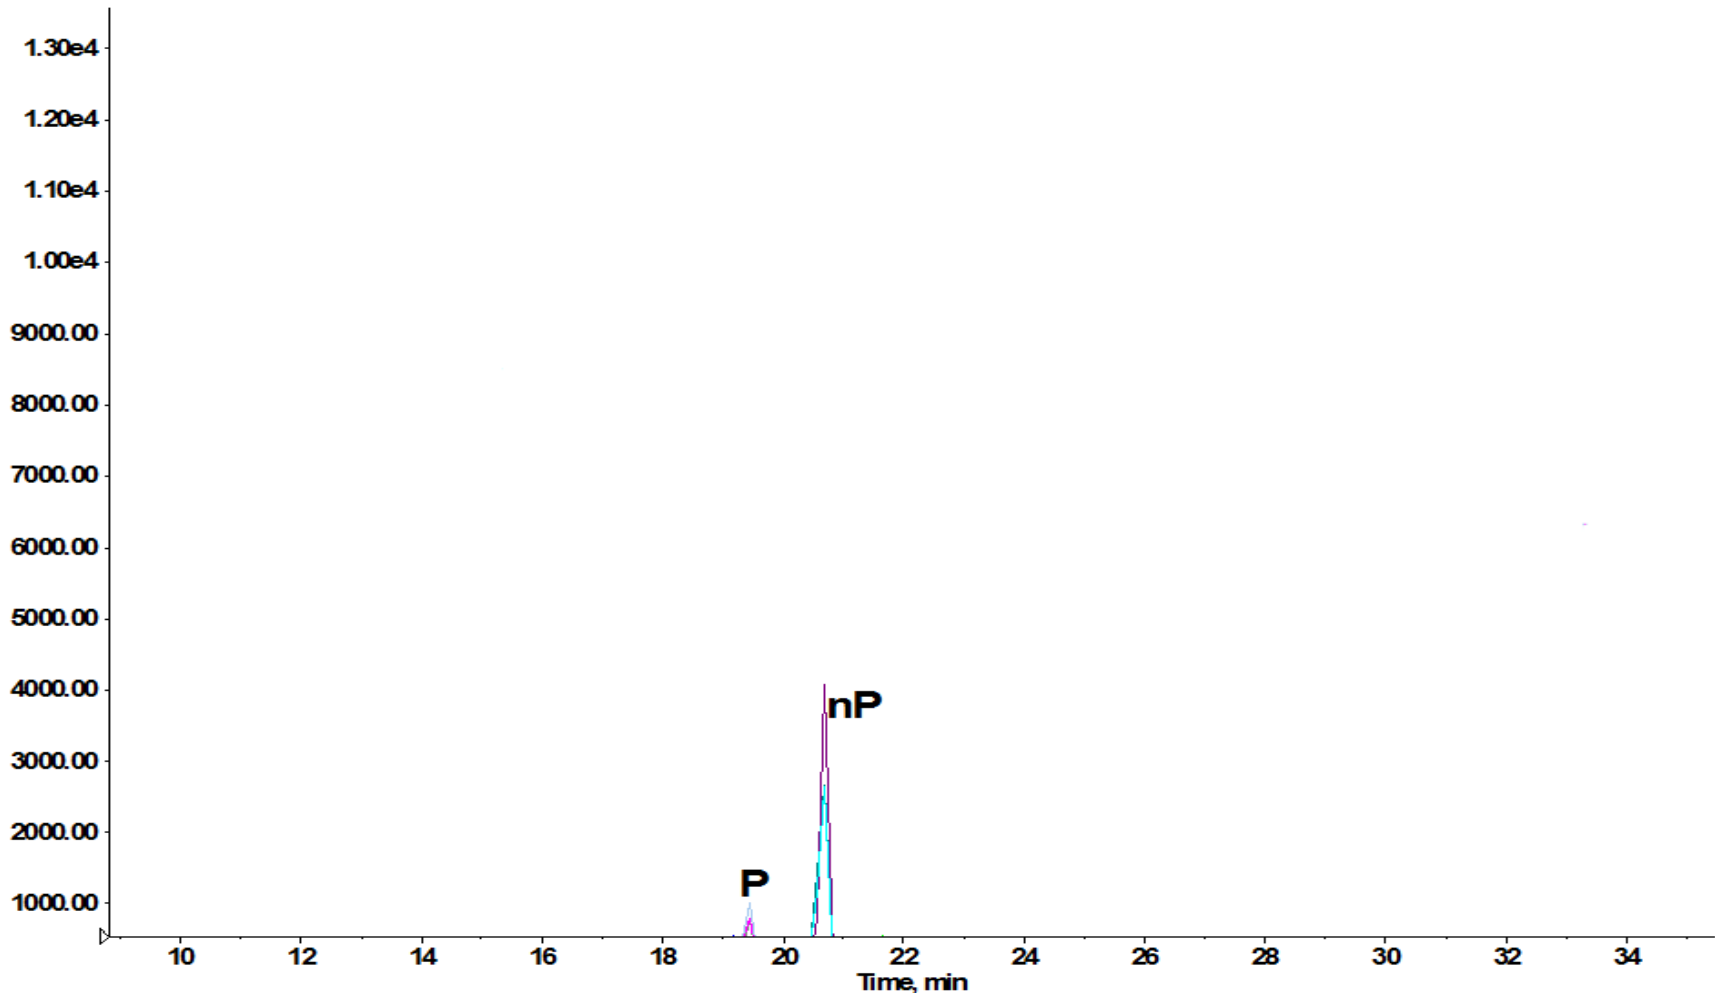

Name: SACE\_1099

WGSSTDLDDPIAAIR  
WGSST[Pho]DLDDPIAAIR

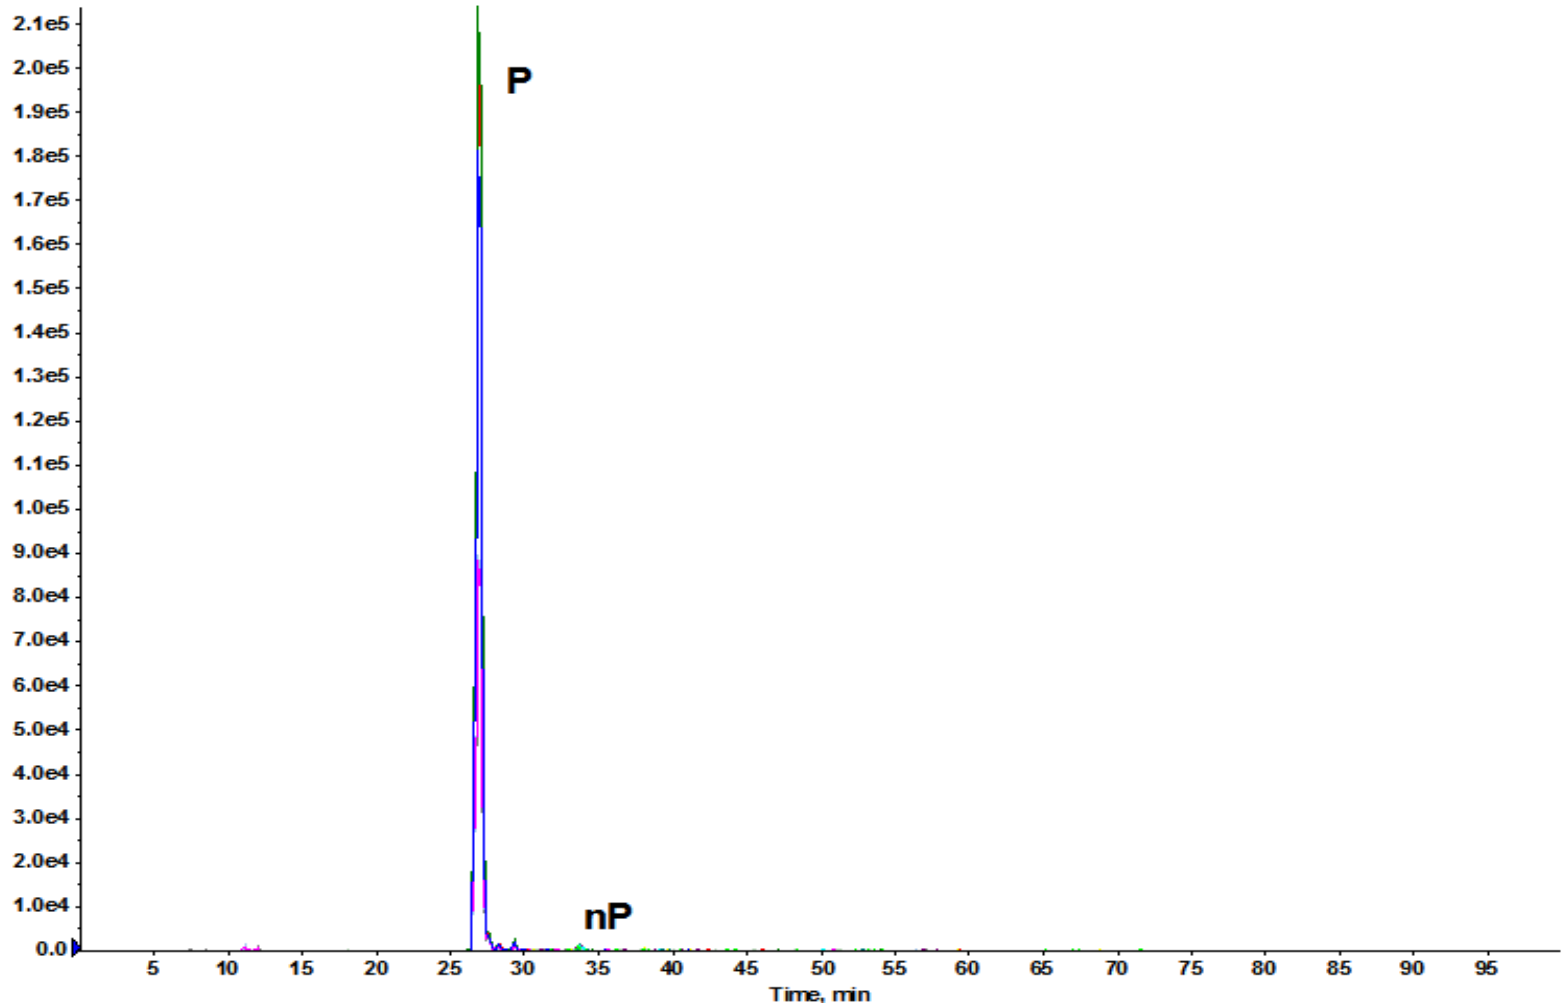

Name: SACE\_1158

YDDVRAALADSR  
YDDVRAALADS[Pho]R

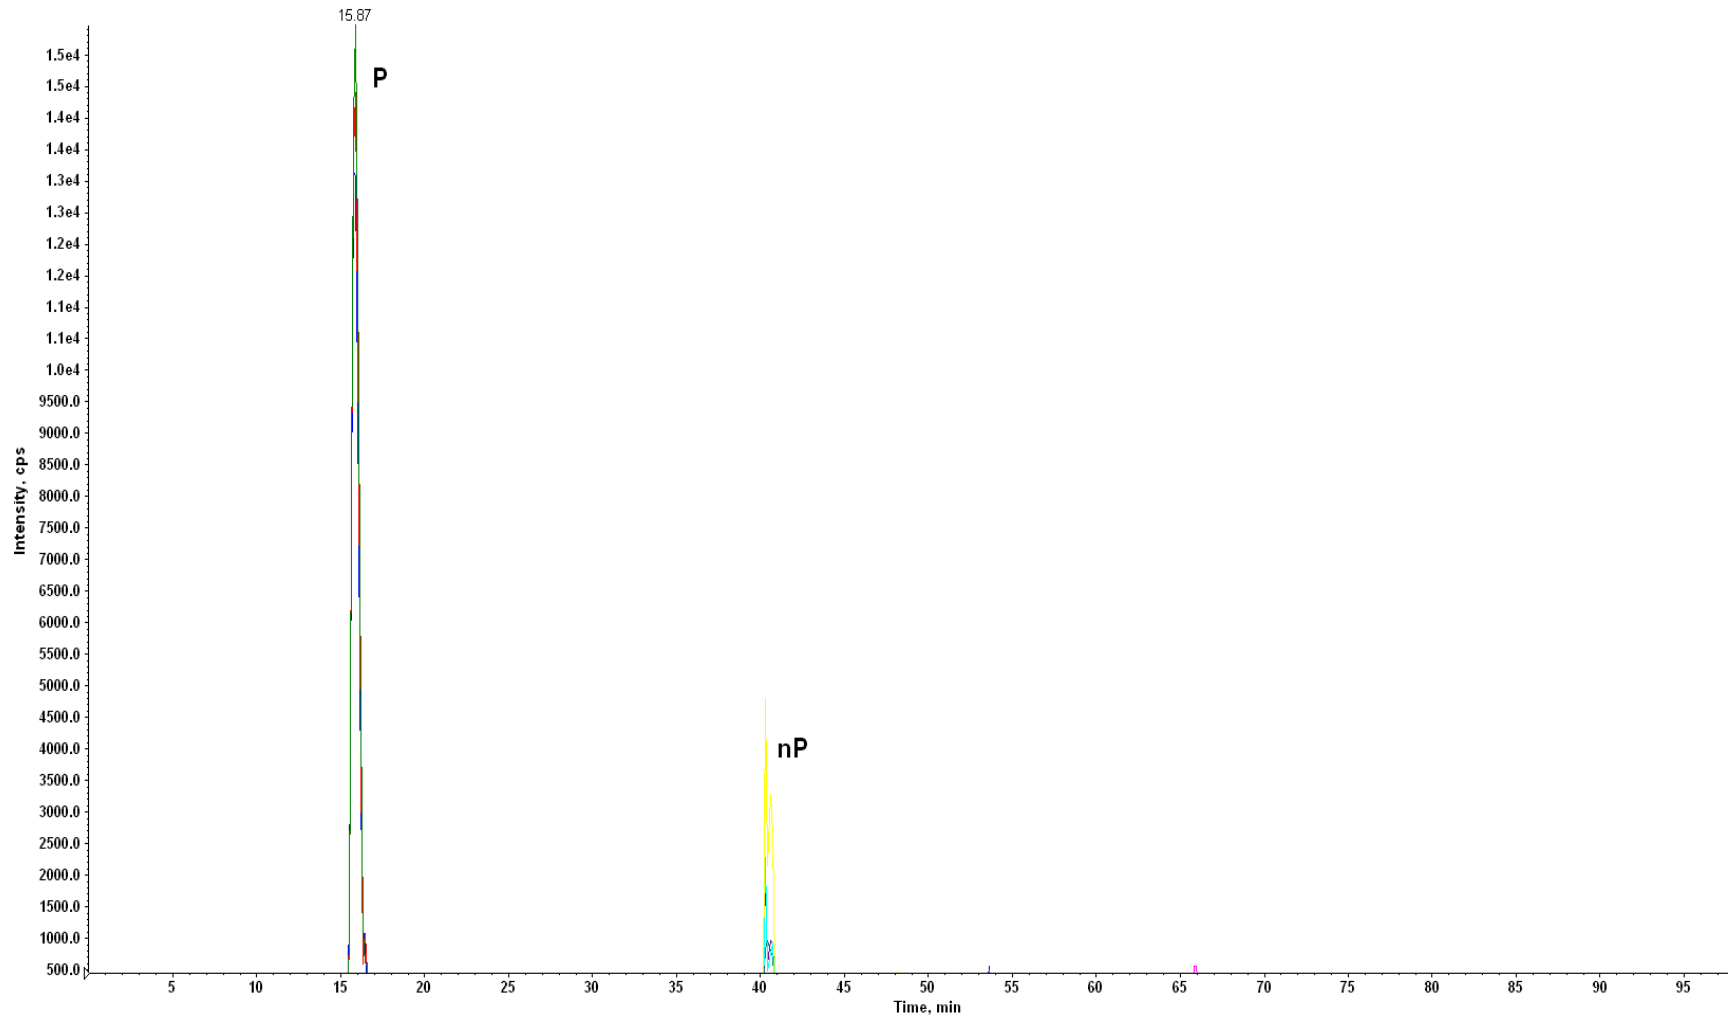

Name: SACE\_1449

SLNYSMFDLAK  
SLNYS[Pho]MFDLAK

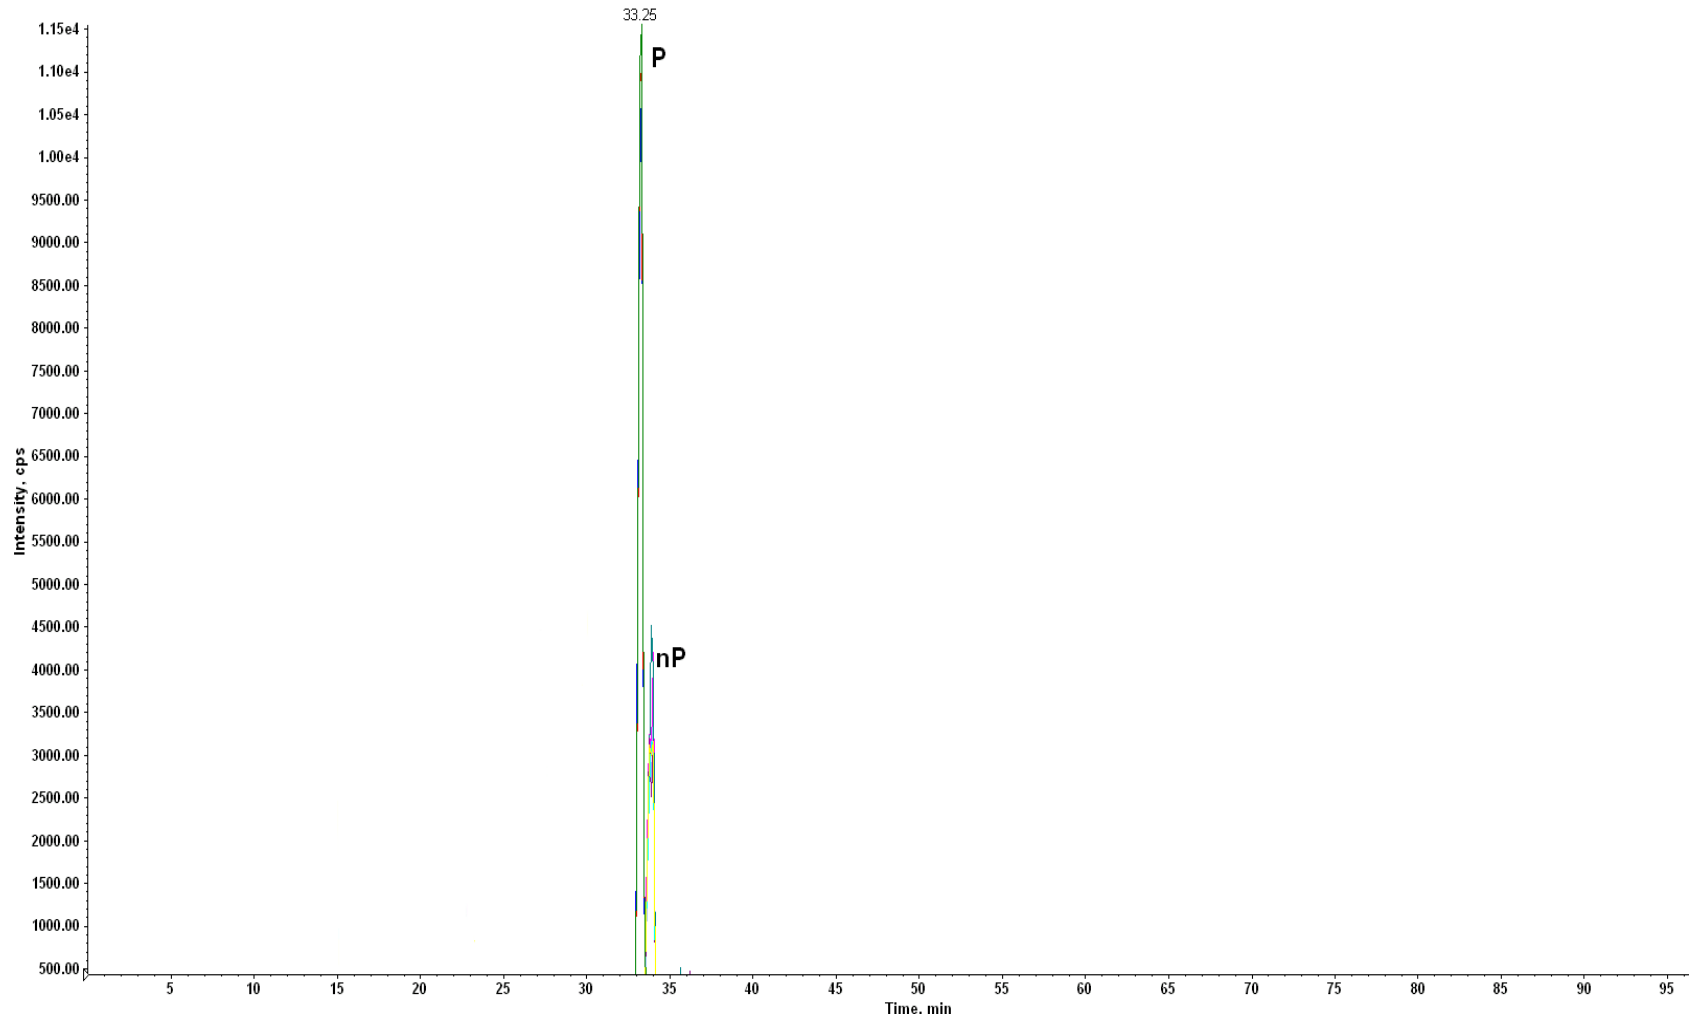

Name: SACE\_6280

APSFQLEGKTEMLETGIK

APS[Pho]FDQLEGKTEMLETGIK

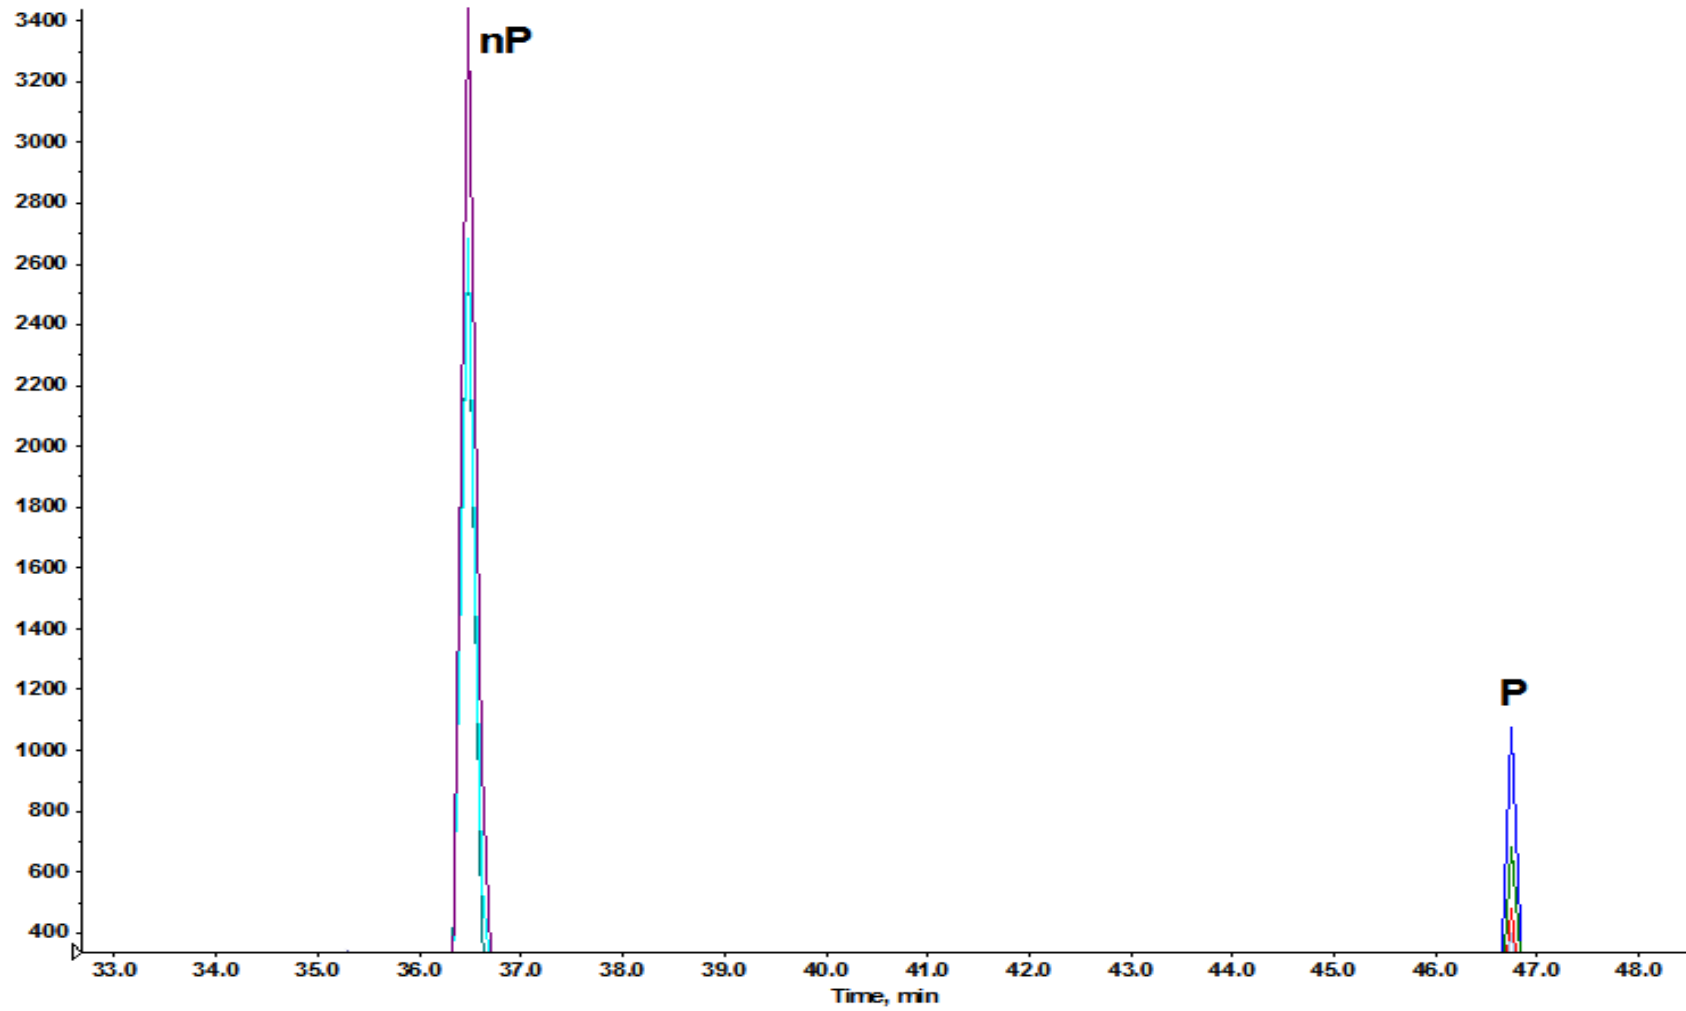

**Name:** SACE\_0774

DSPTLTAAAFRTAIVPAAGLGTR  
DSPTLT[Pho]AAAFRTAIVPAAGLGTR

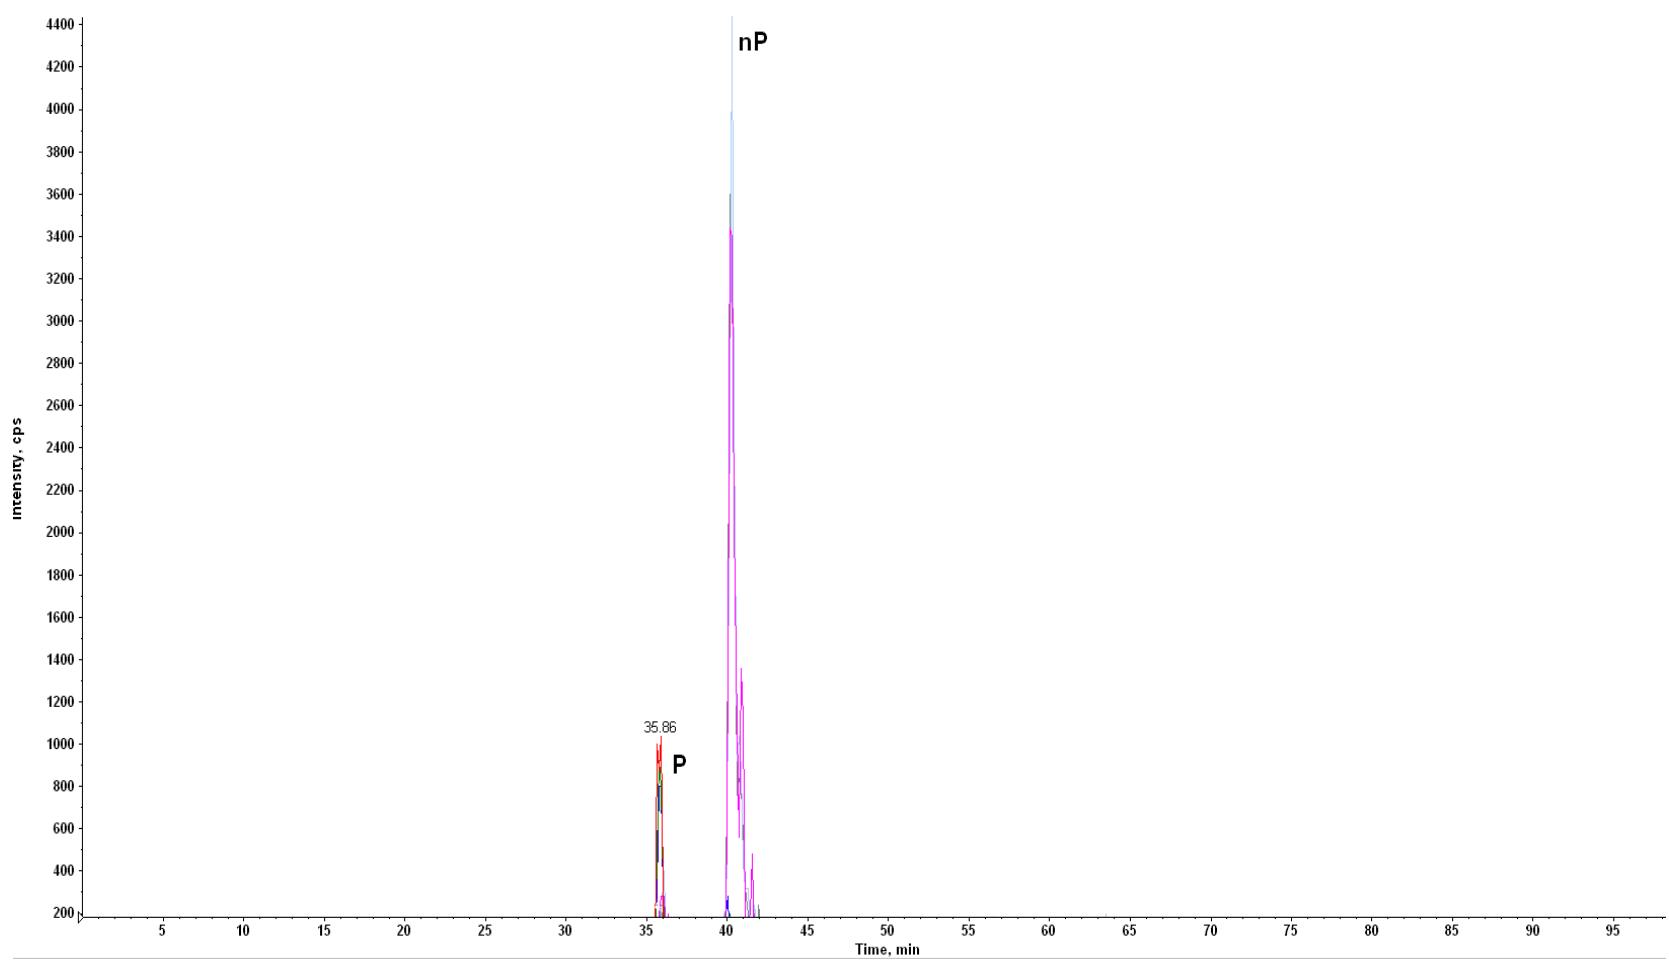

Name: SACE\_6945

TELVTVSTPGDR

TELV[Pho]VSTPGDR

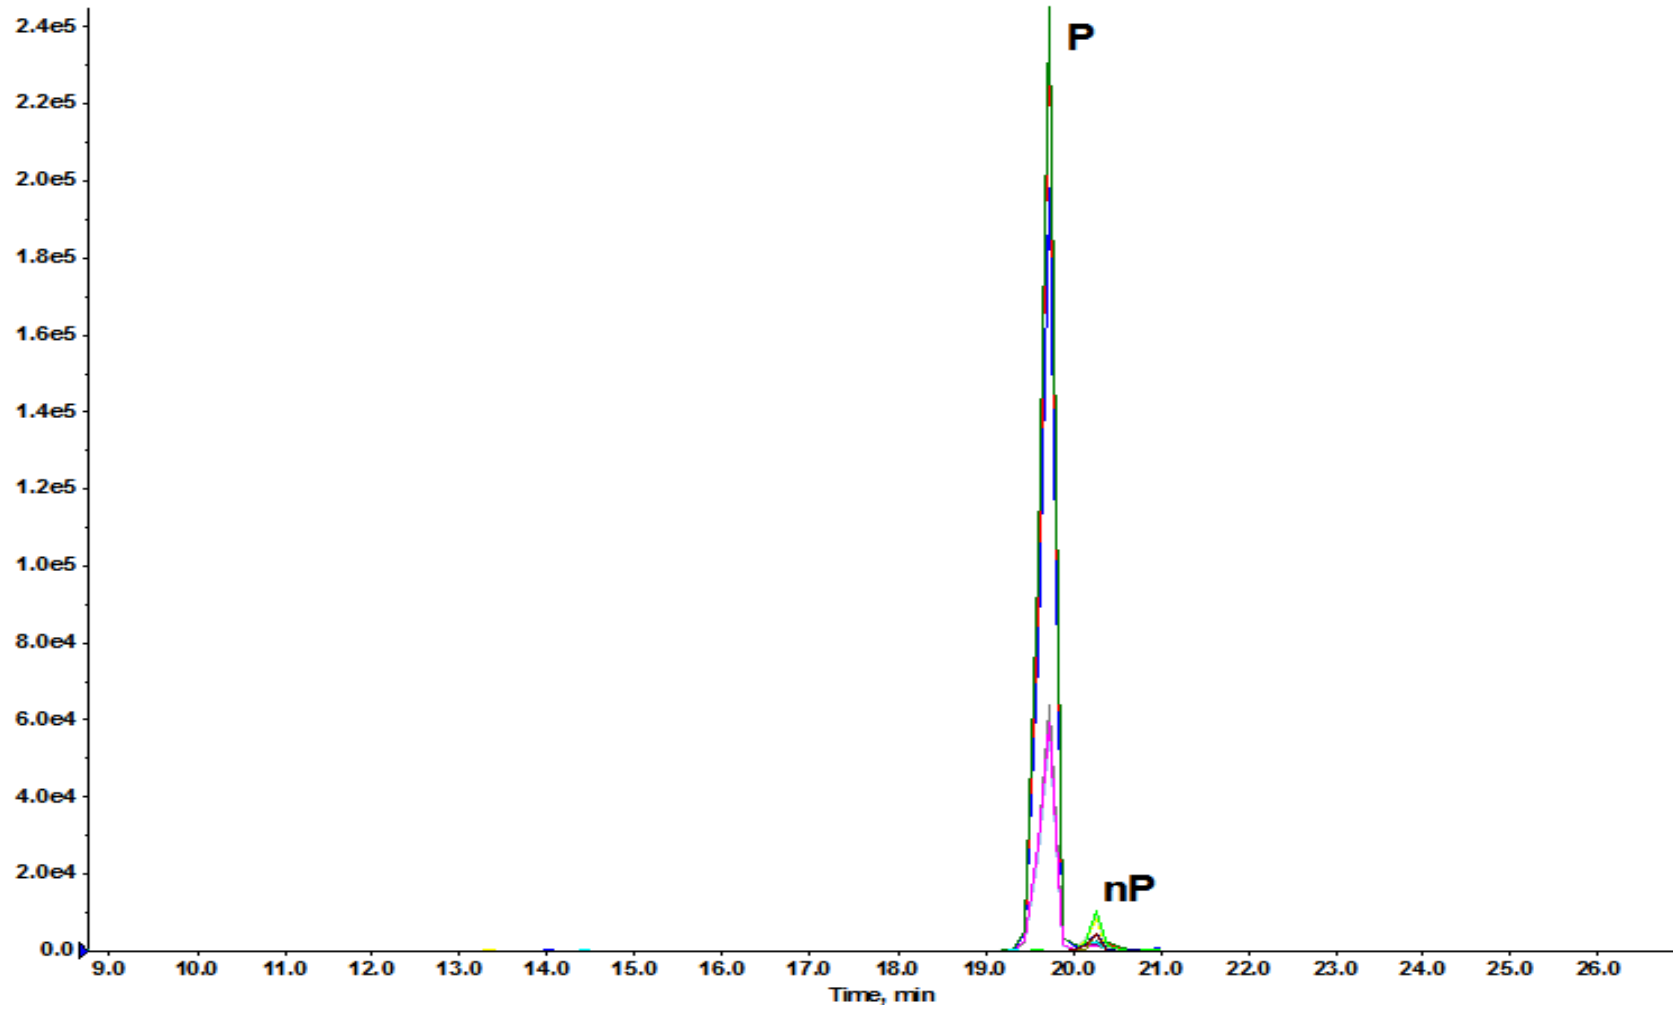

Name: SACE\_6460

LELPGAMFTASHNPAEYNGIK  
LELPGAMFTAS[Pho]HNPAEYNGIK

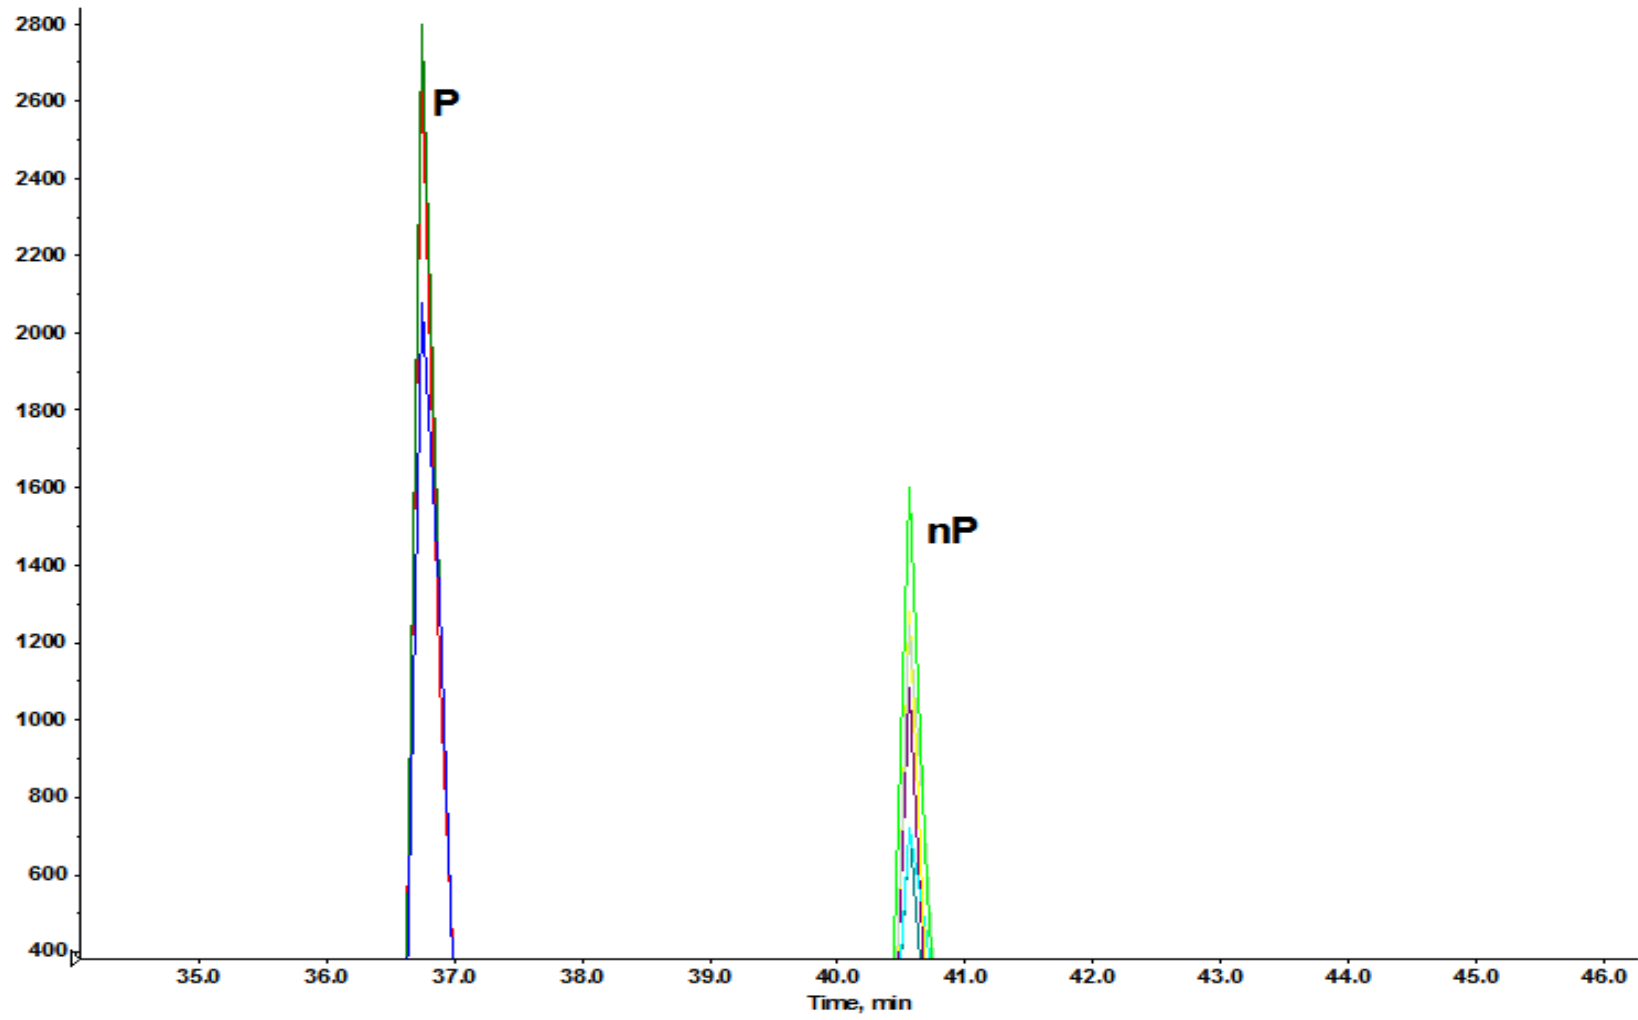



Name: SACE\_4070

MPTGTVFLYHAQER

MPT[Pho]GTVFLYHAQER

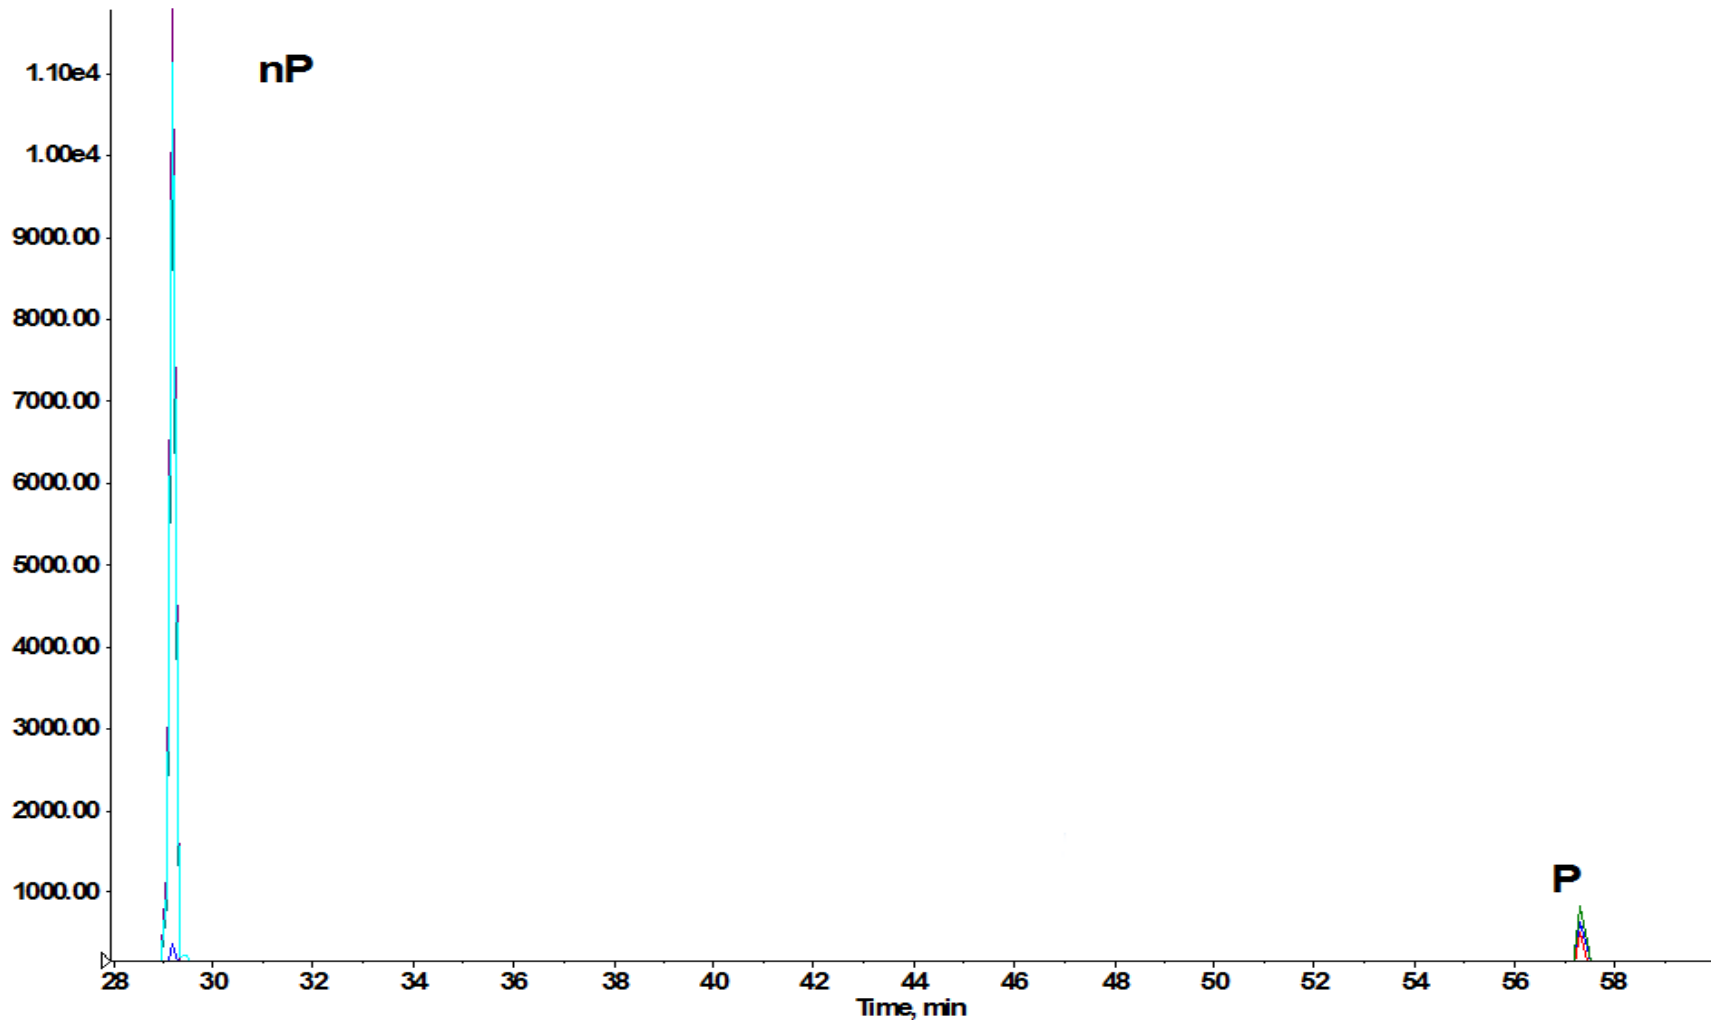

Name: SACE\_7356

RVPPPPGRPPQAPPGEQPTENIPQHPGDR  
RVPPPPGRPPQAPPGEQPT[Pho]ENIPQHPGDR

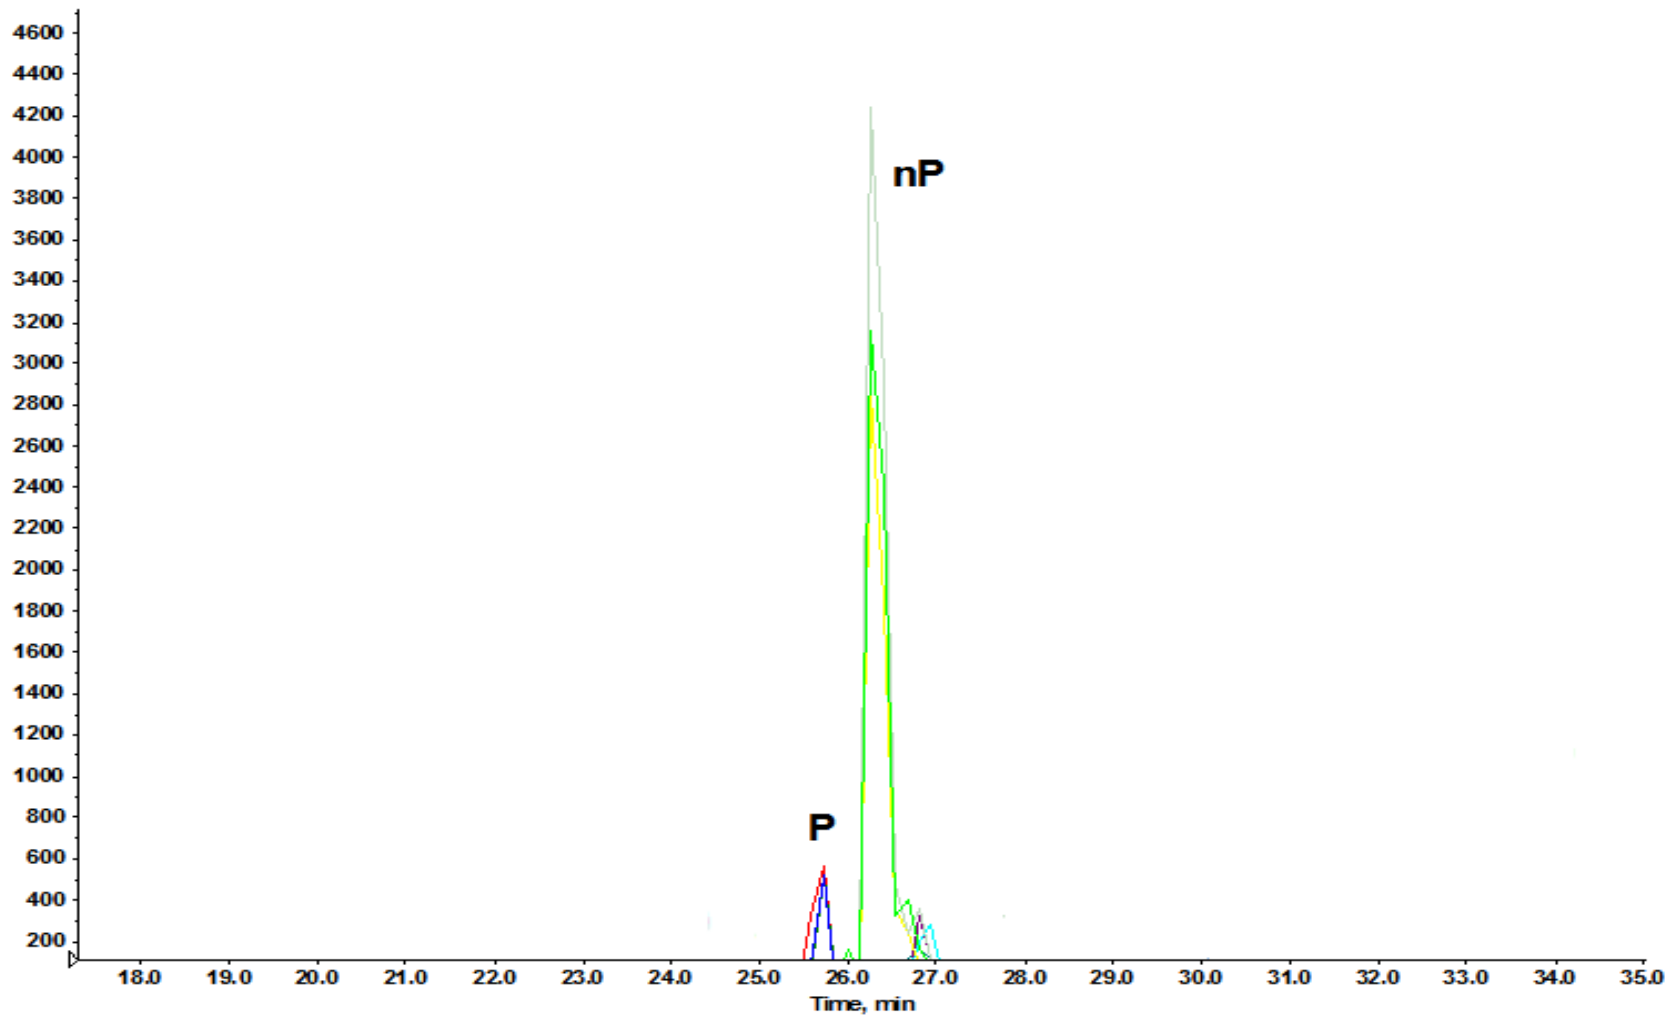

GIGEVYDGSSPR  
GIGEVYDGS[Pho]SPR

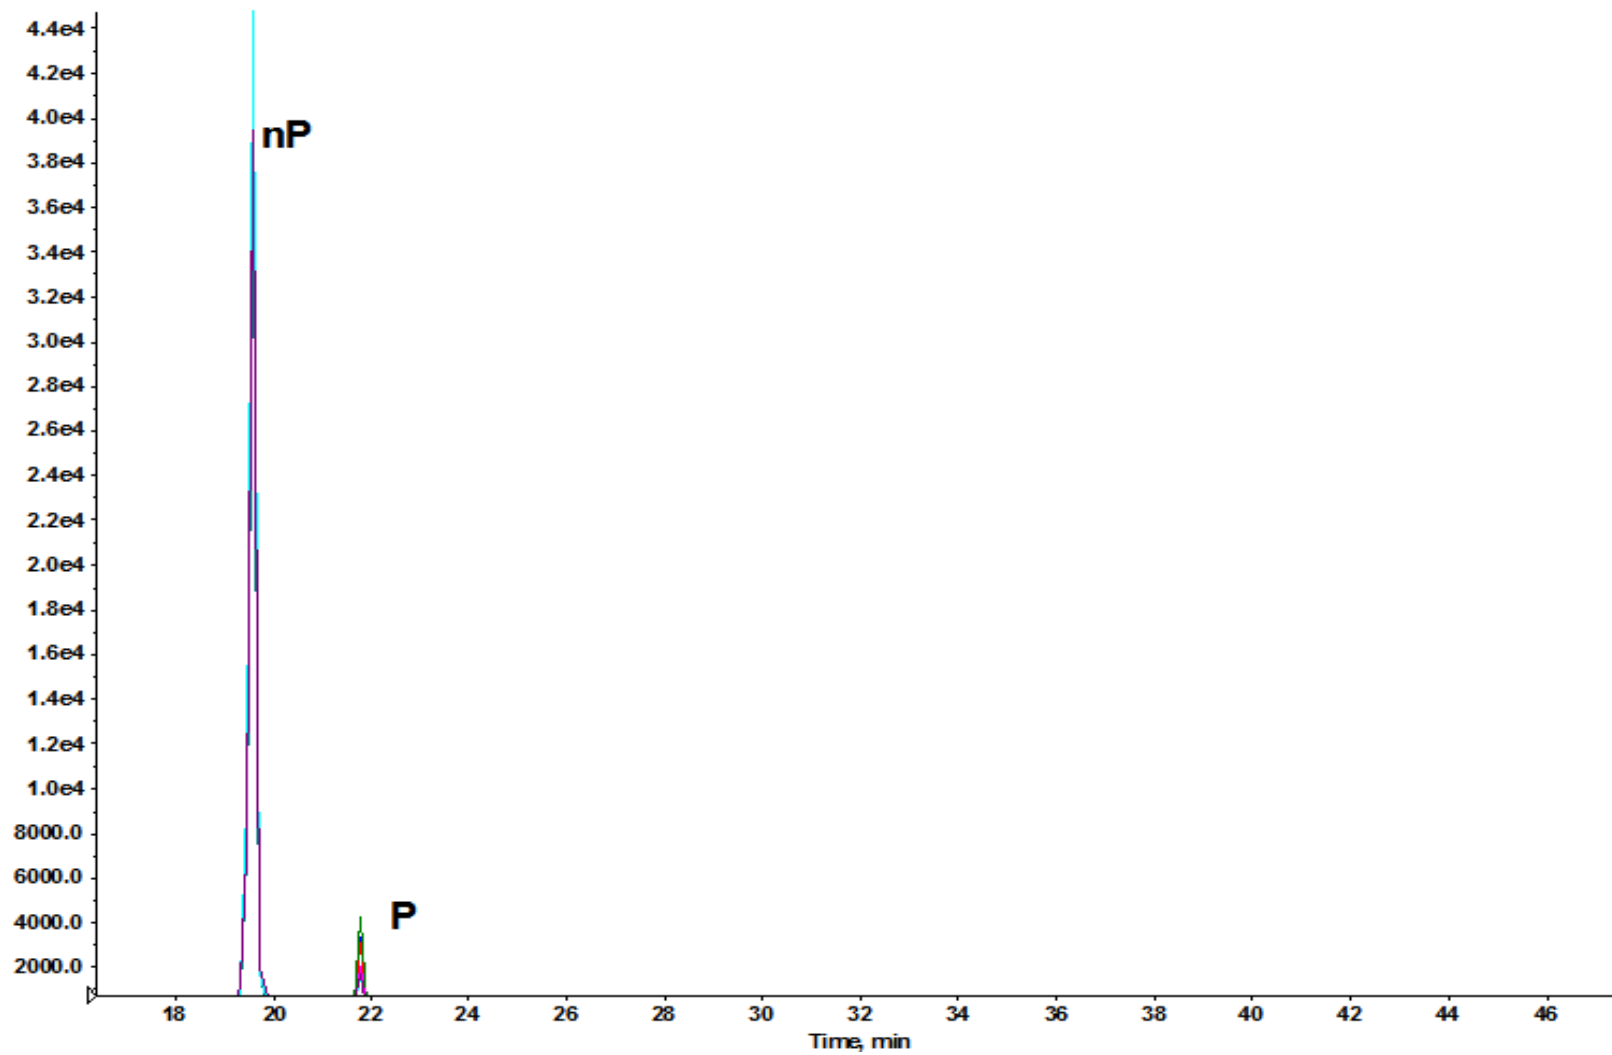

Name: SACE\_5677

TNVEHVYAIGDVTGR

T[Pho]NVEHVYAIGDVTGR

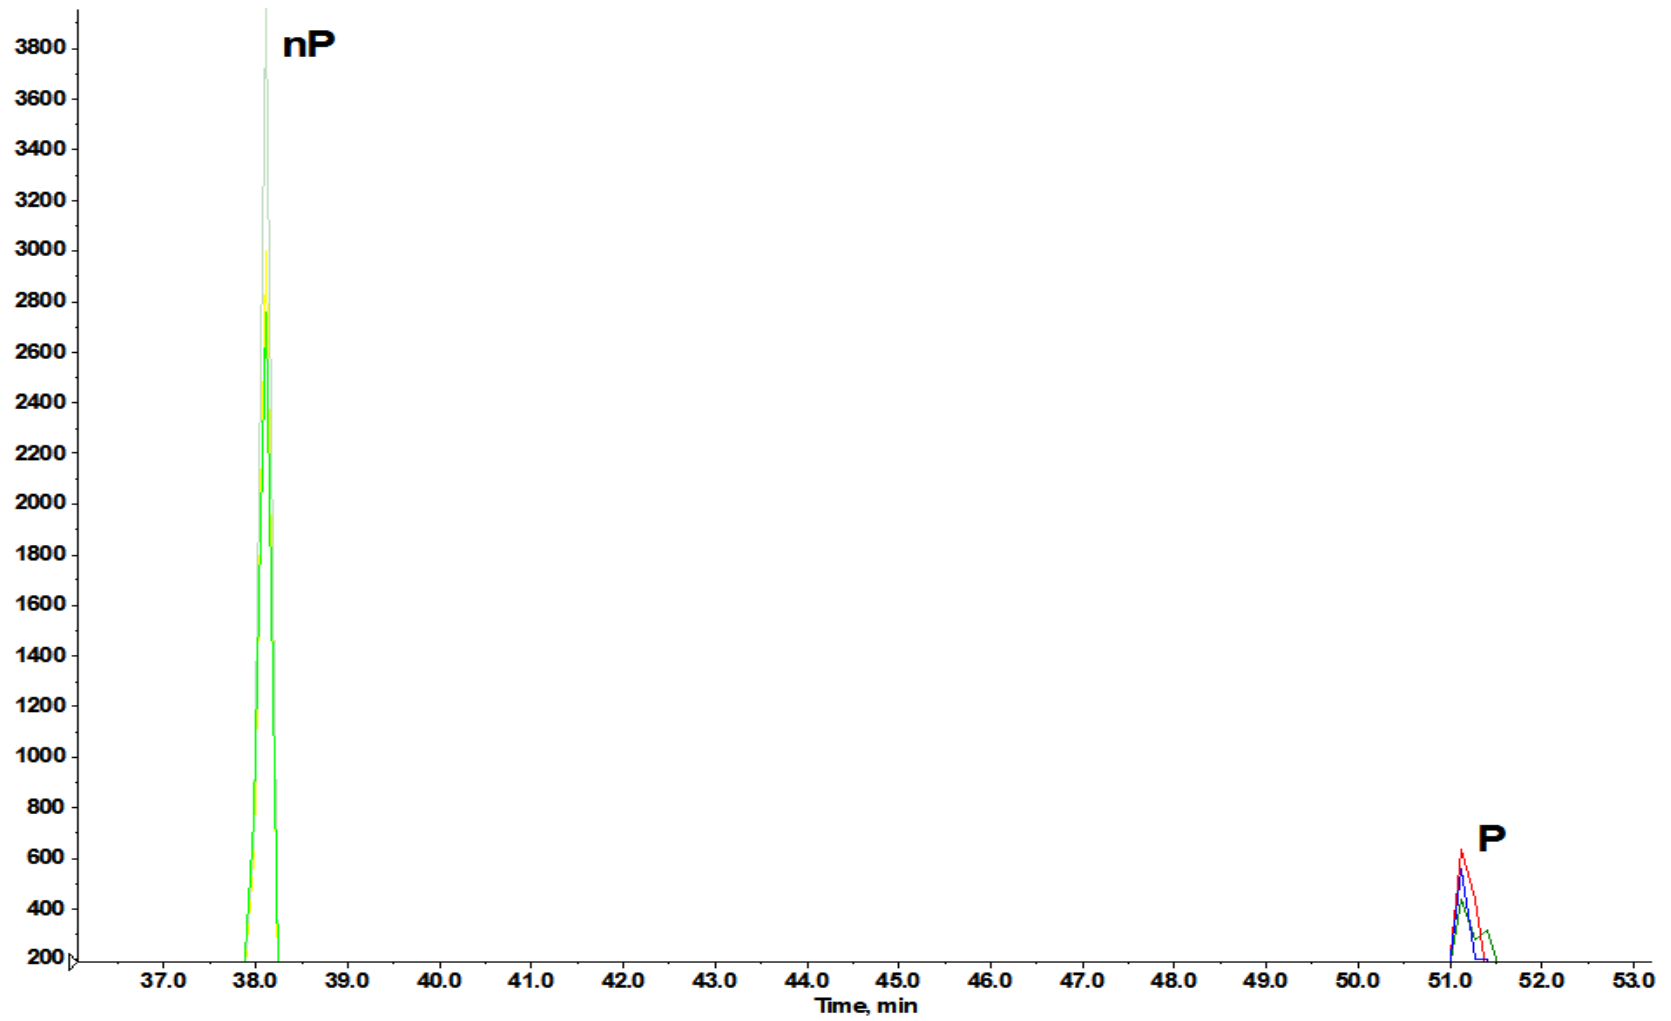

Name: SACE\_6118

ALEGRTGERKLAELSEEDRKGLTDDRR  
ALEGRT[Pho]GERKLAELSEEDRKGLT[Pho]DDRR

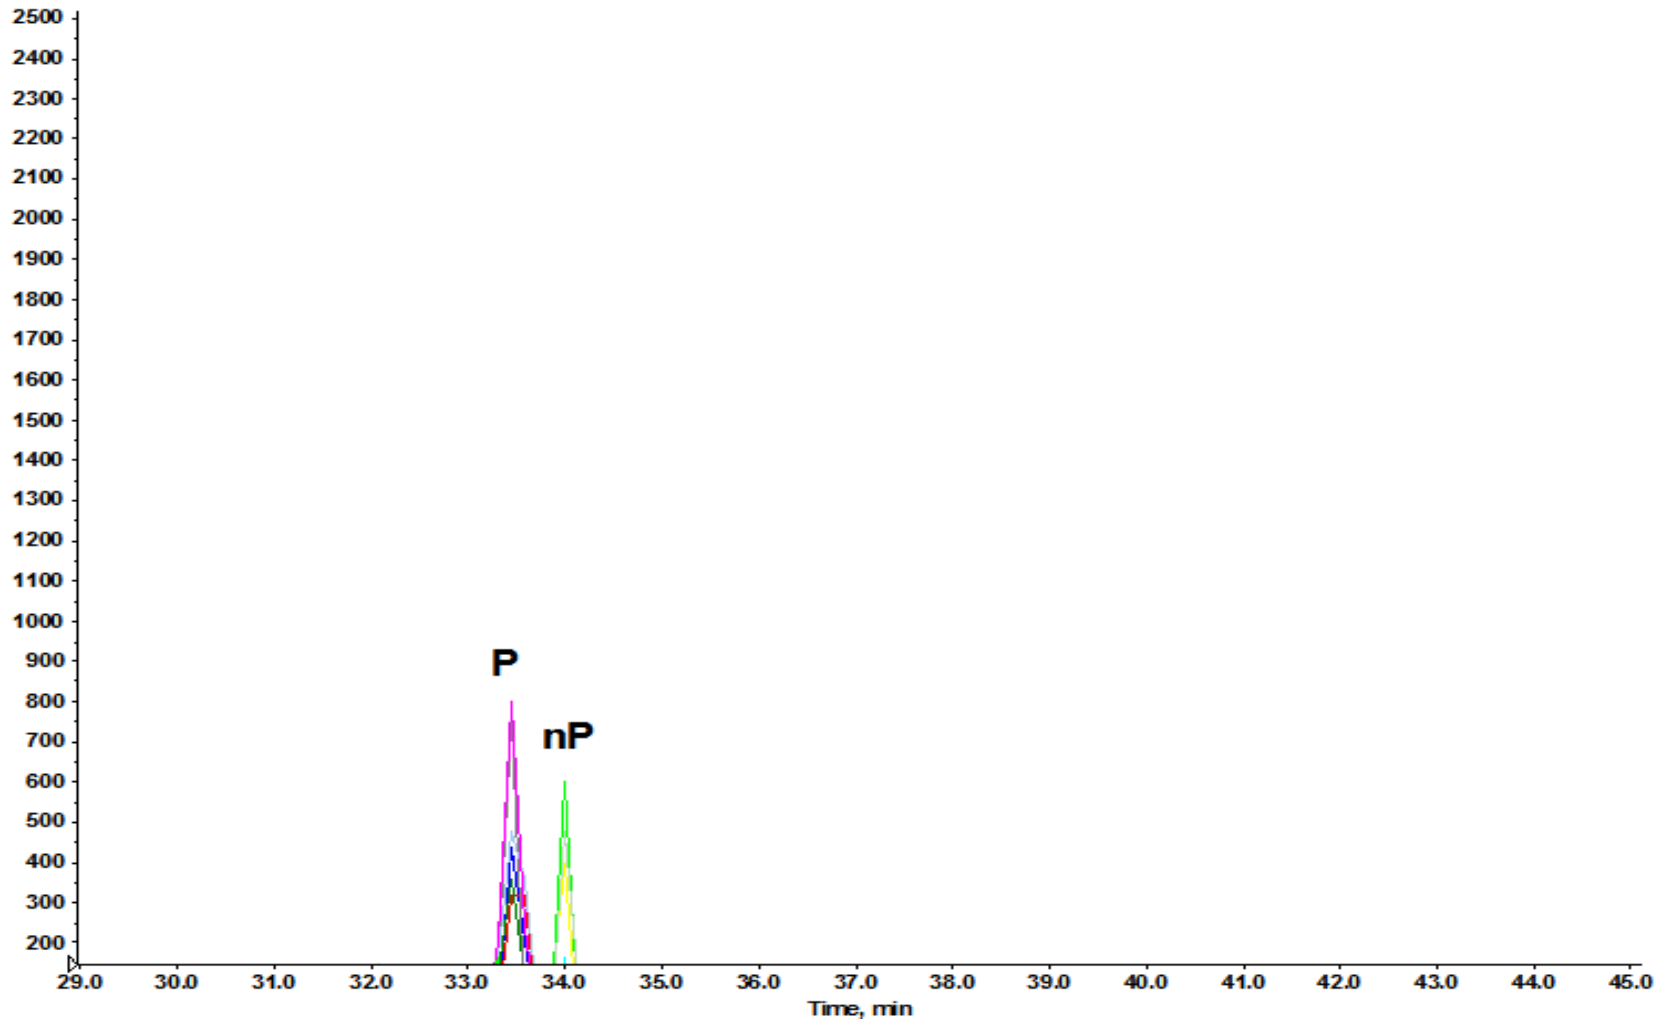

Name: SACE\_1736

KLTSALYNAK  
KLTS[Pho]ALYNAK

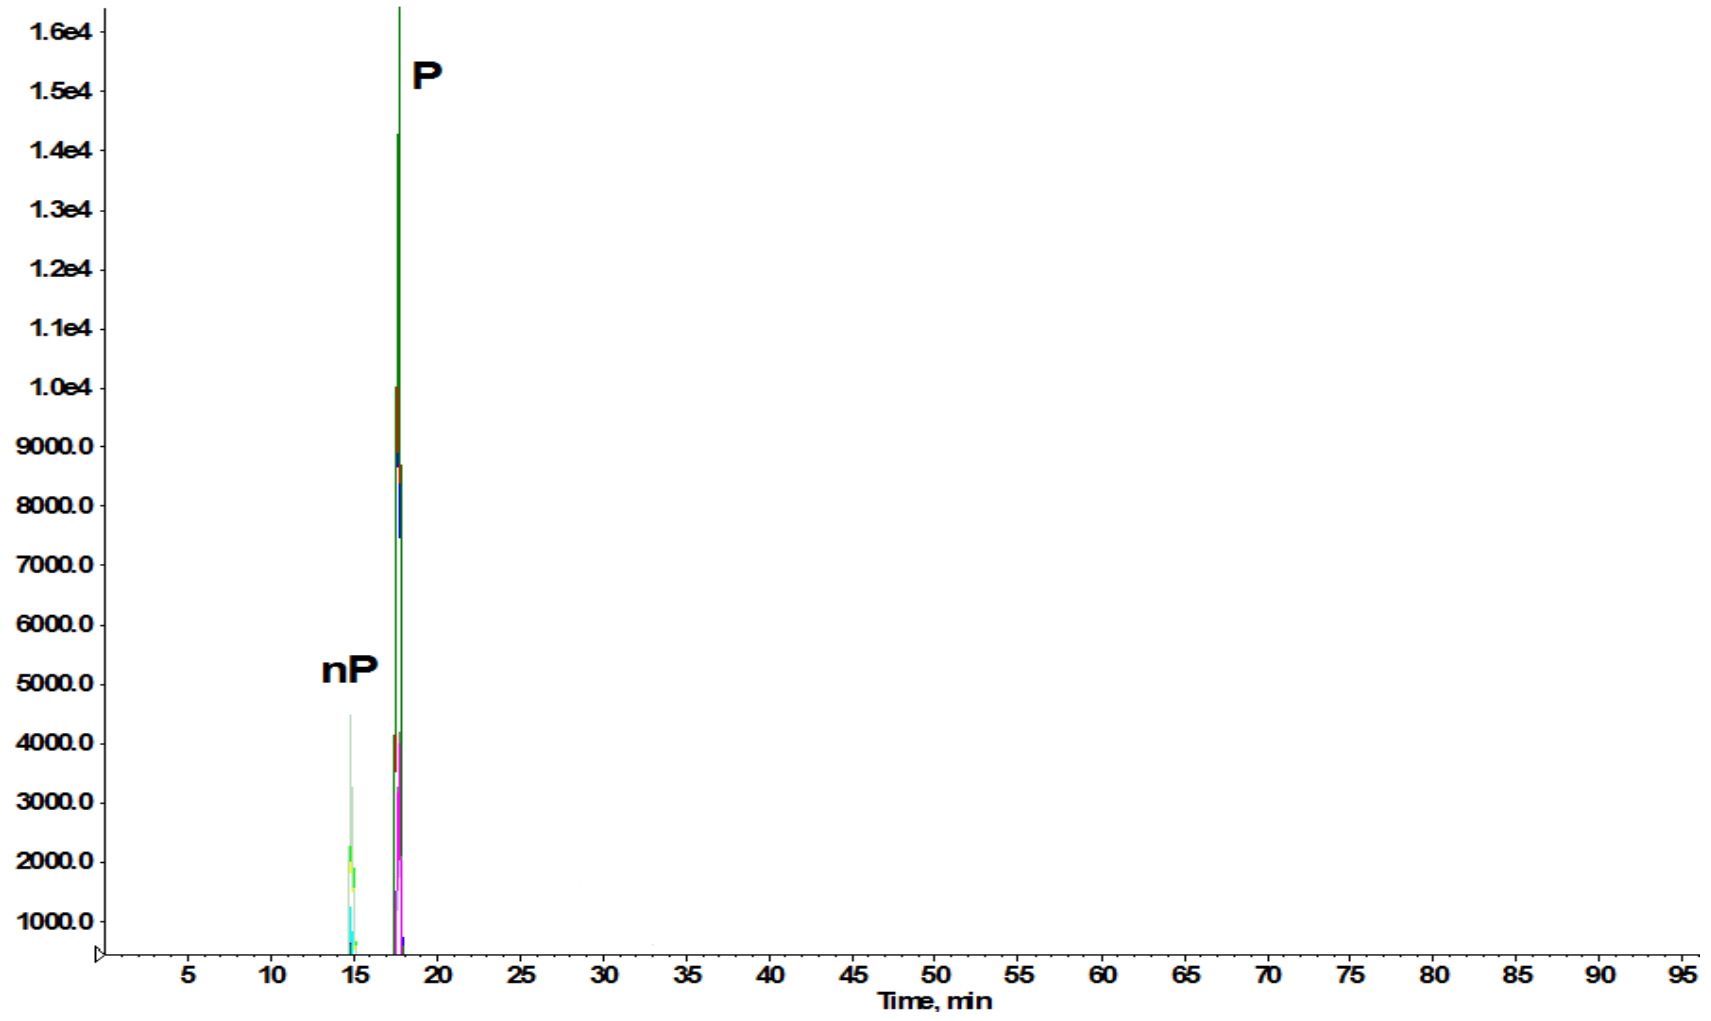

Name: SACE\_7351

YELMVILDPSLDER  
YELMVILDPS[Pho]LDER

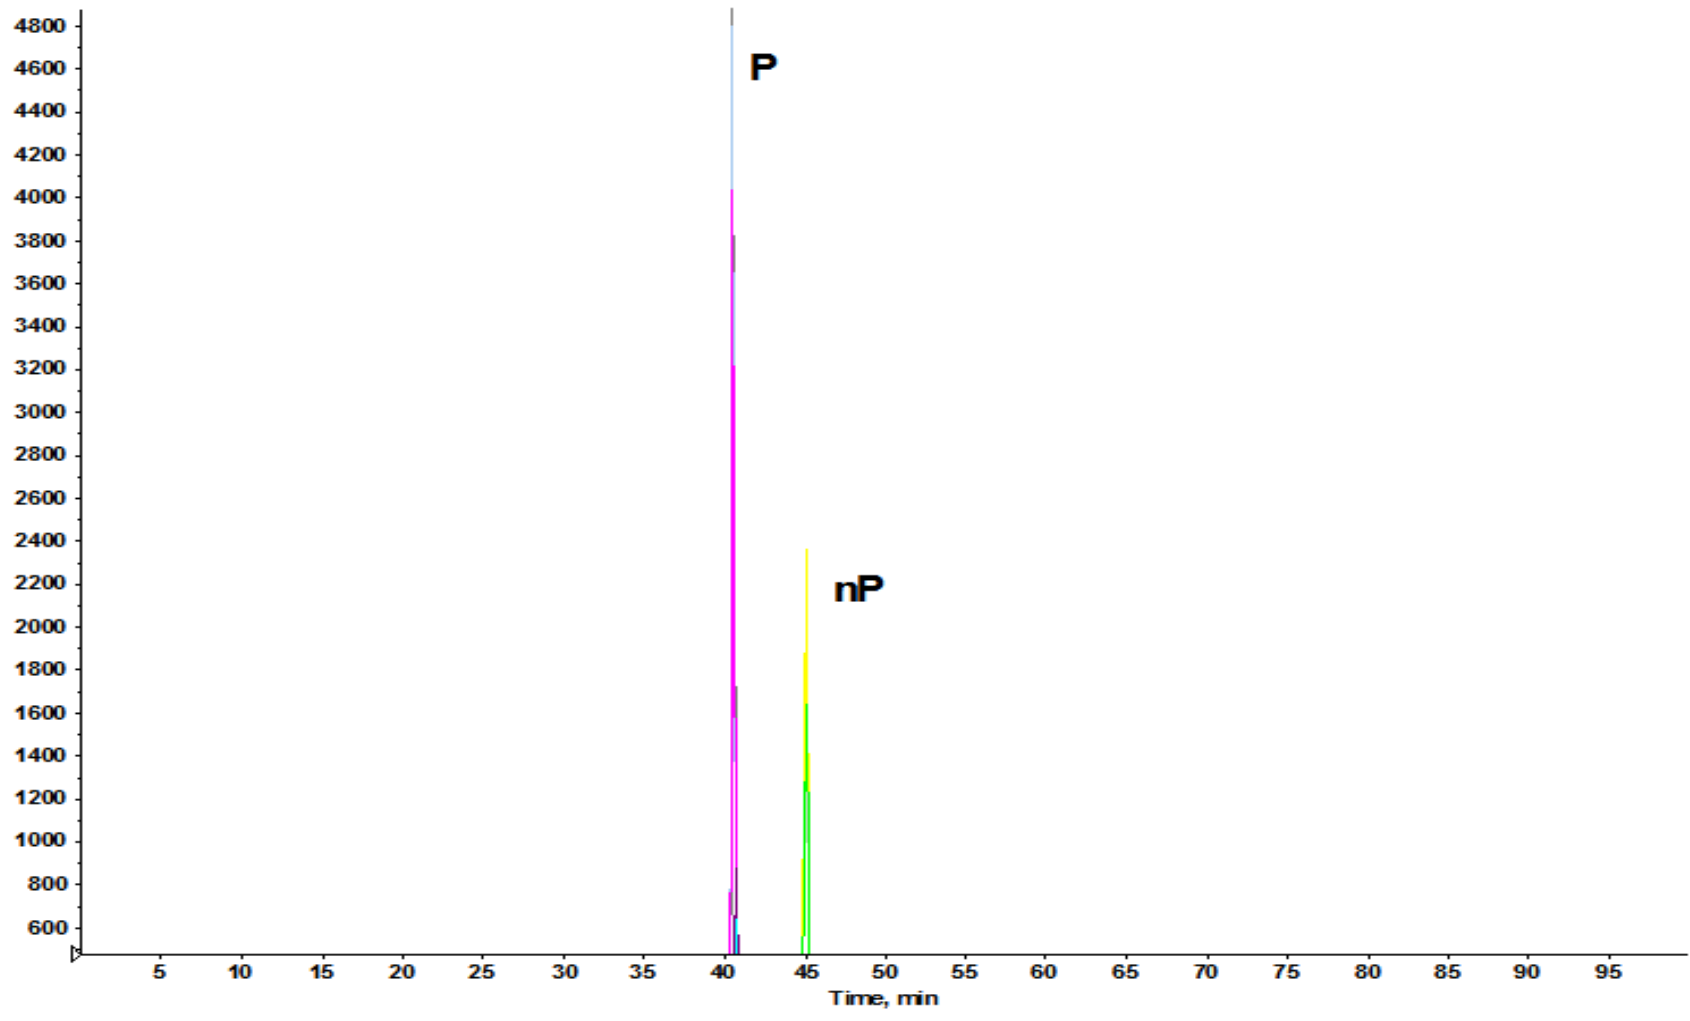

Name: SACE\_0194

LTFSTLSEIWYR

LTFSTLS[Pho]EIWYR

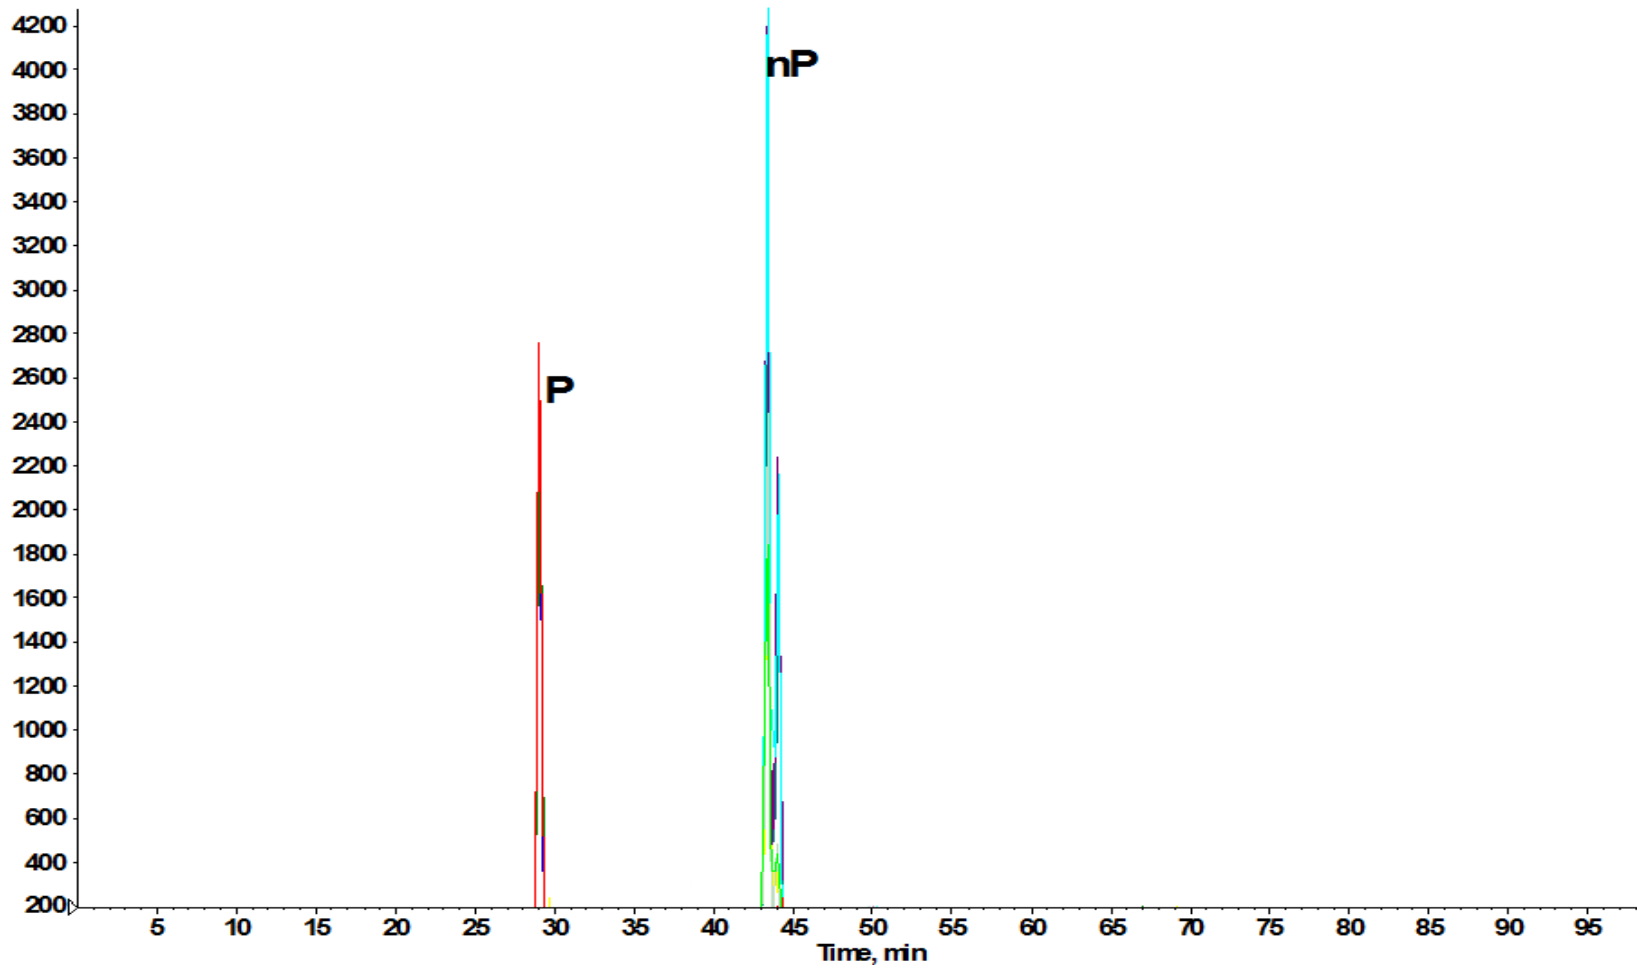



Name: SACE\_0195

LYLAKESR  
LYLAKES[Pho]R

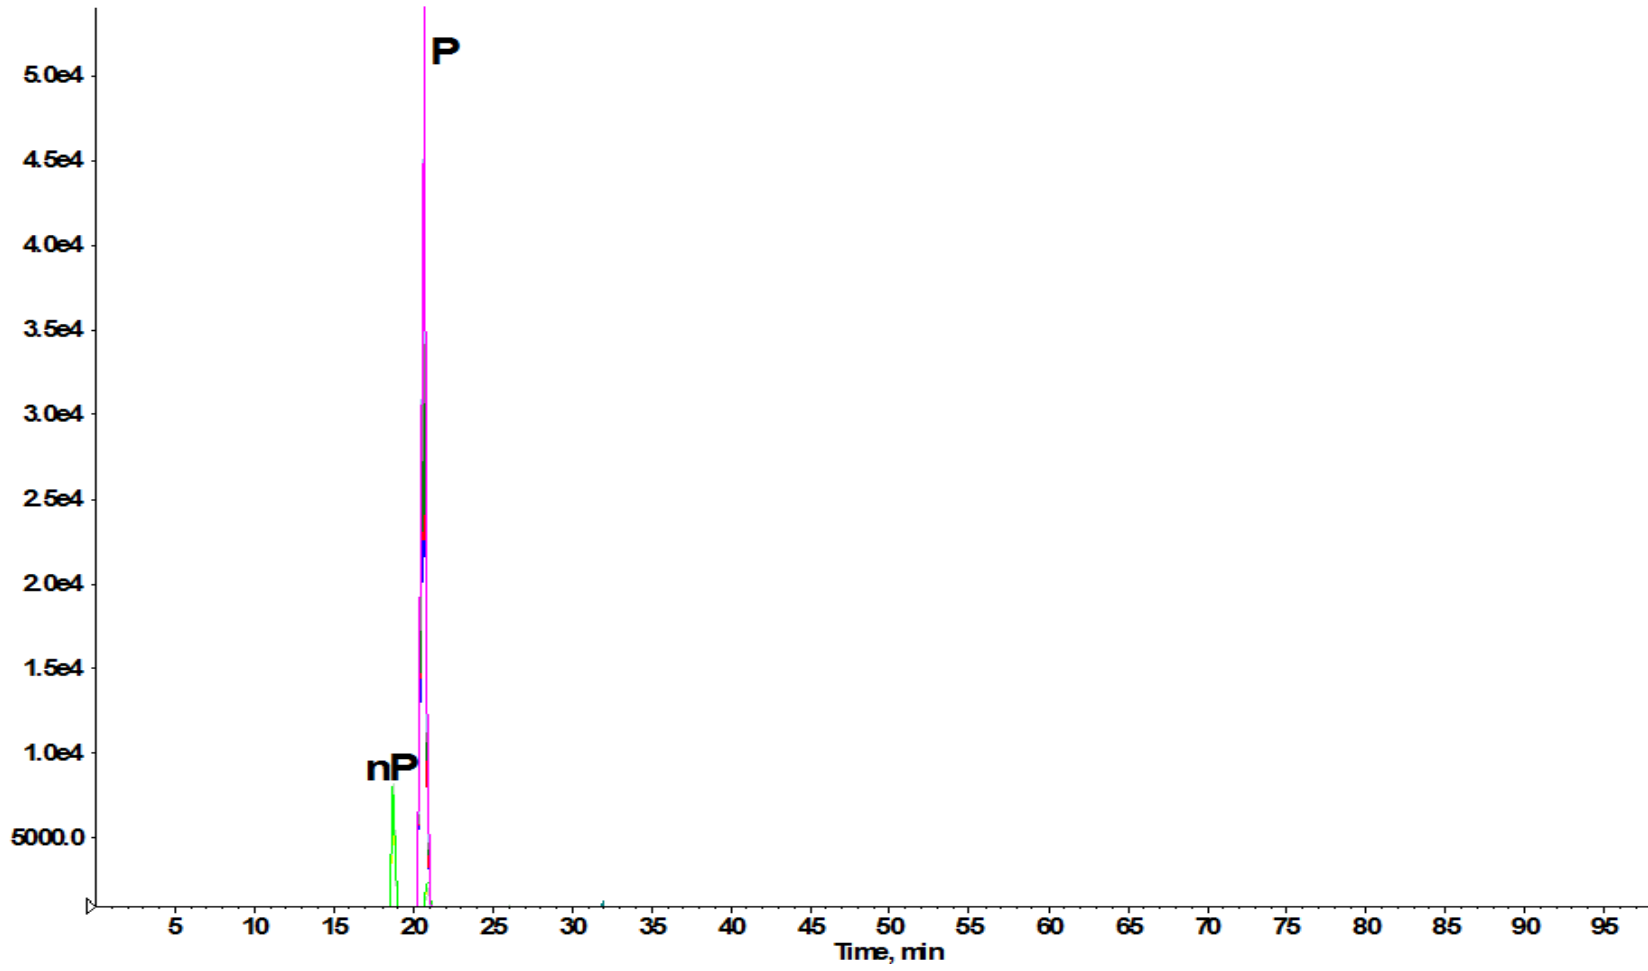

VISTPDVEVIKAVR  
VIST[Pho]PDVEVIKAVR

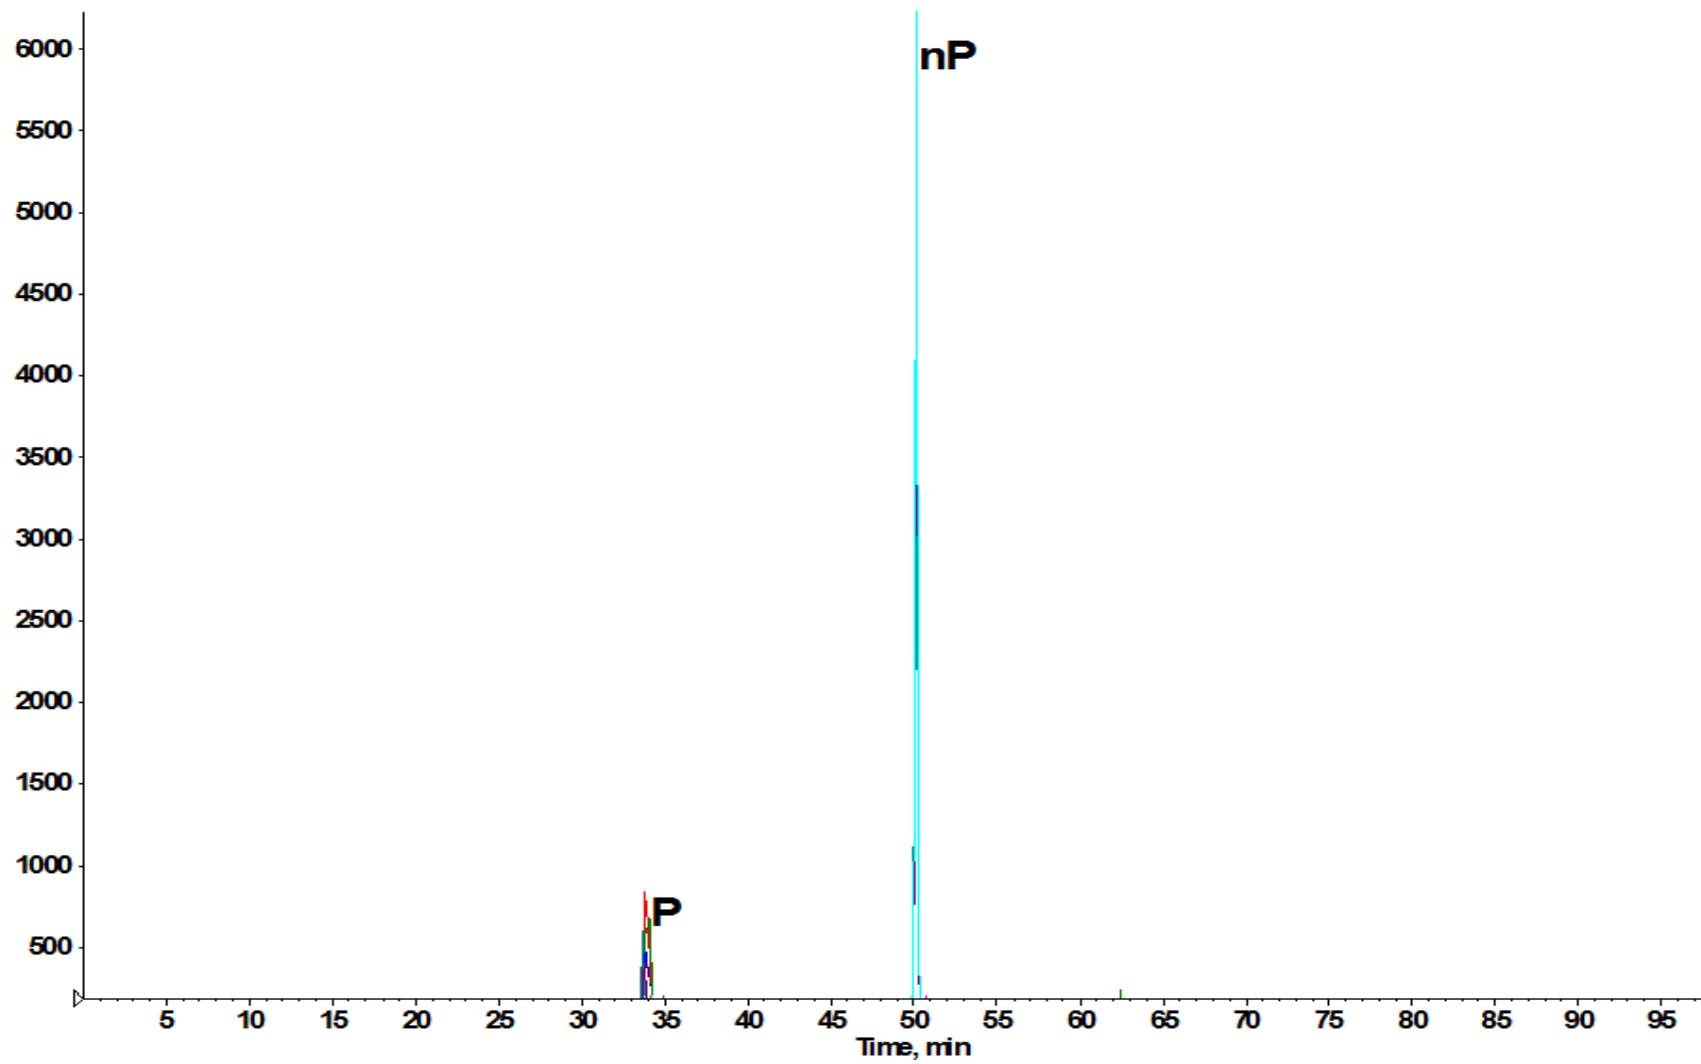

Name: SACE\_0461

SLAALPATTTAVISGR

SLAALPATTT[Pho]AVISGR

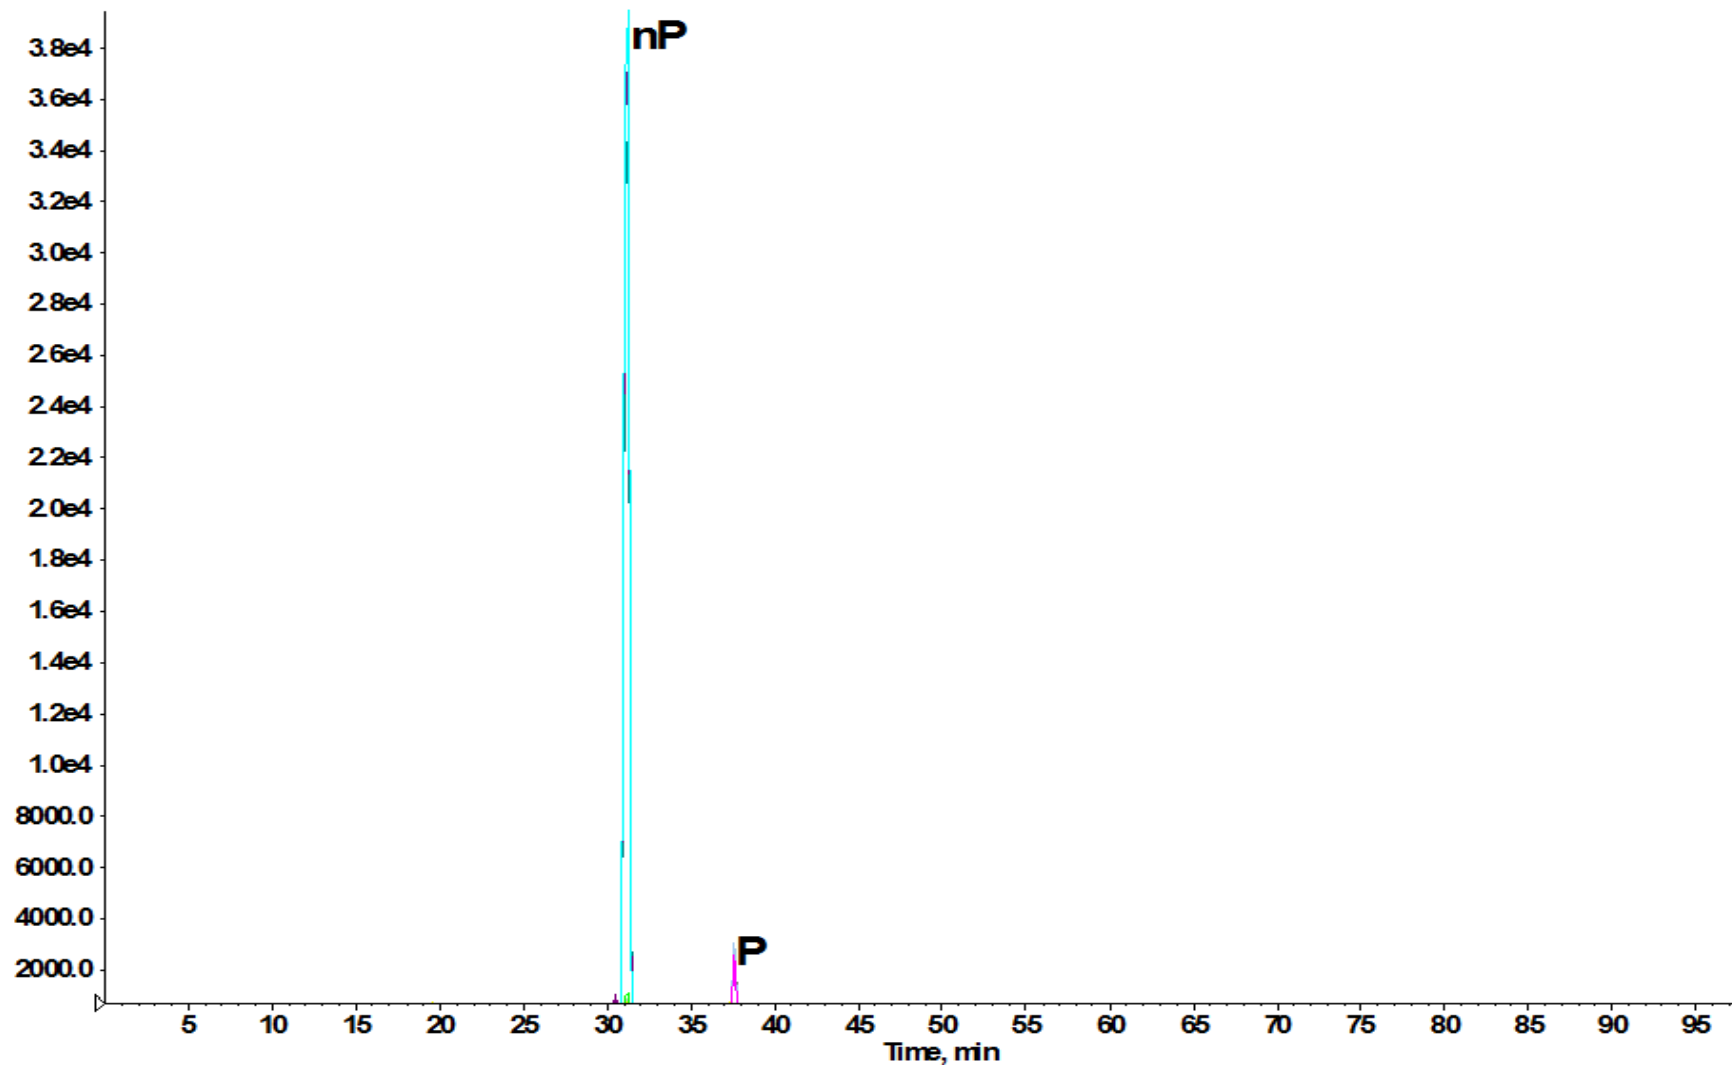

Name: SACE\_0602

VSPVPEDYTW

VS[Pho]PVPEDYTW

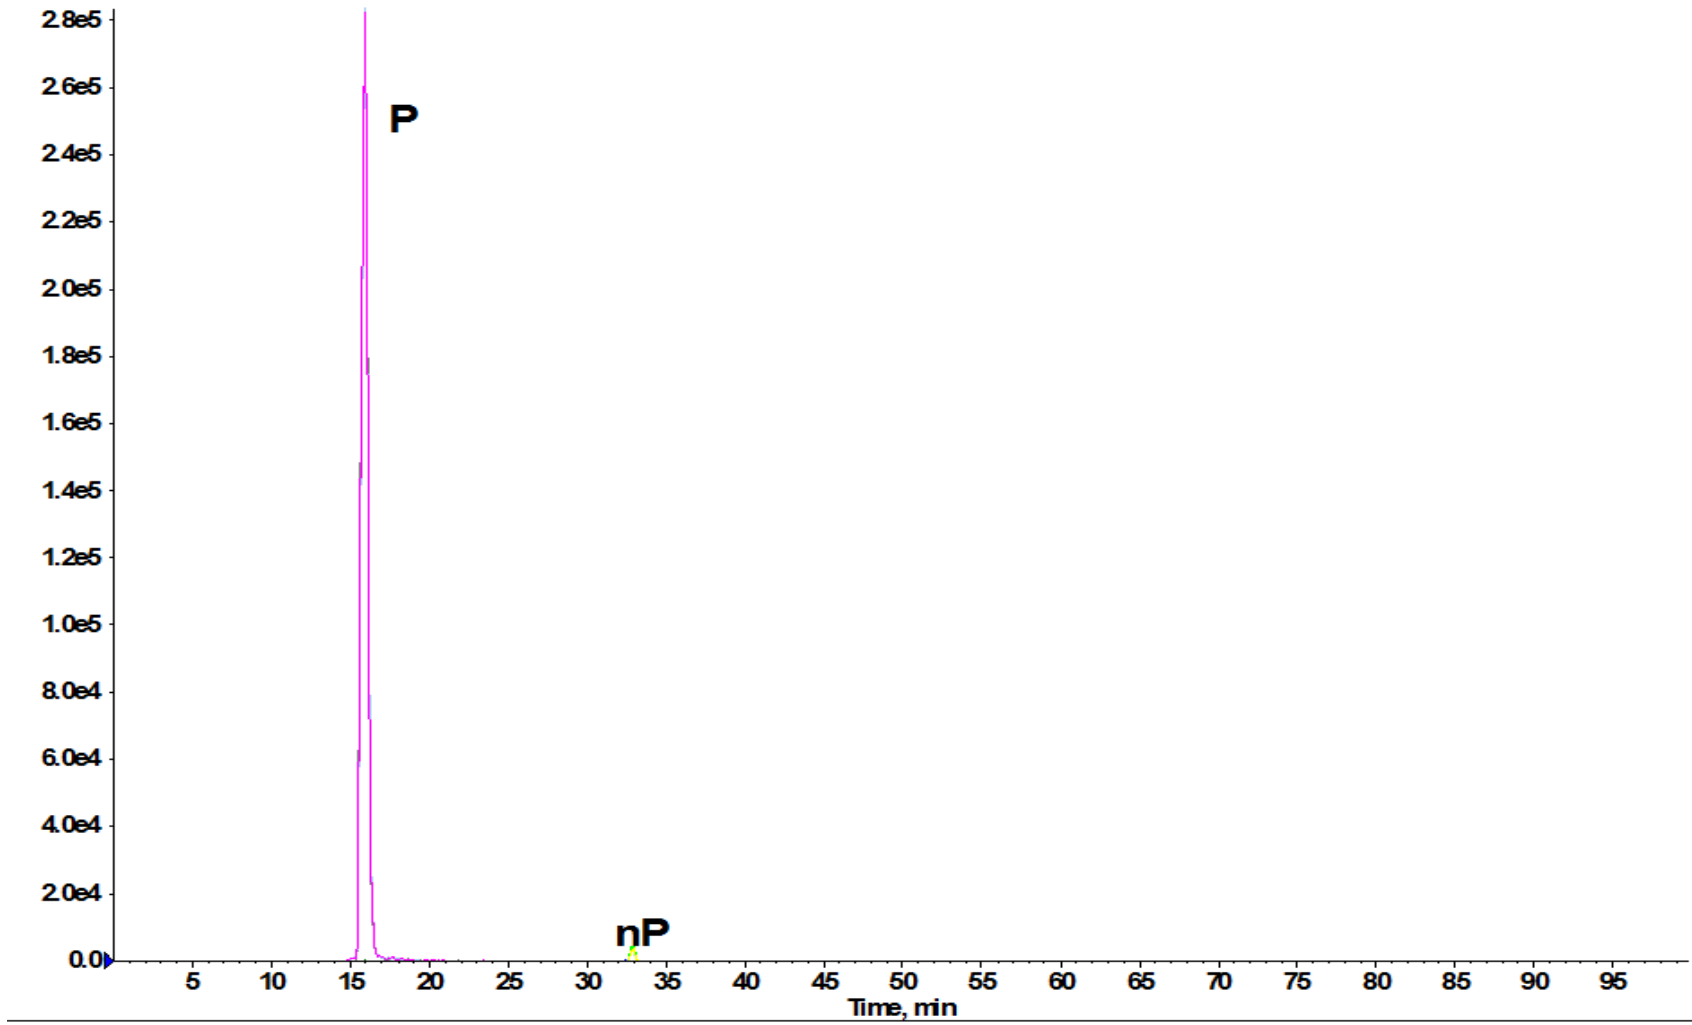

Name: SACE\_1406

GKSQEPETPVVEAAPAAEPEAK

GKS[Pho]QEPETPVVEAAPAAEPEAK

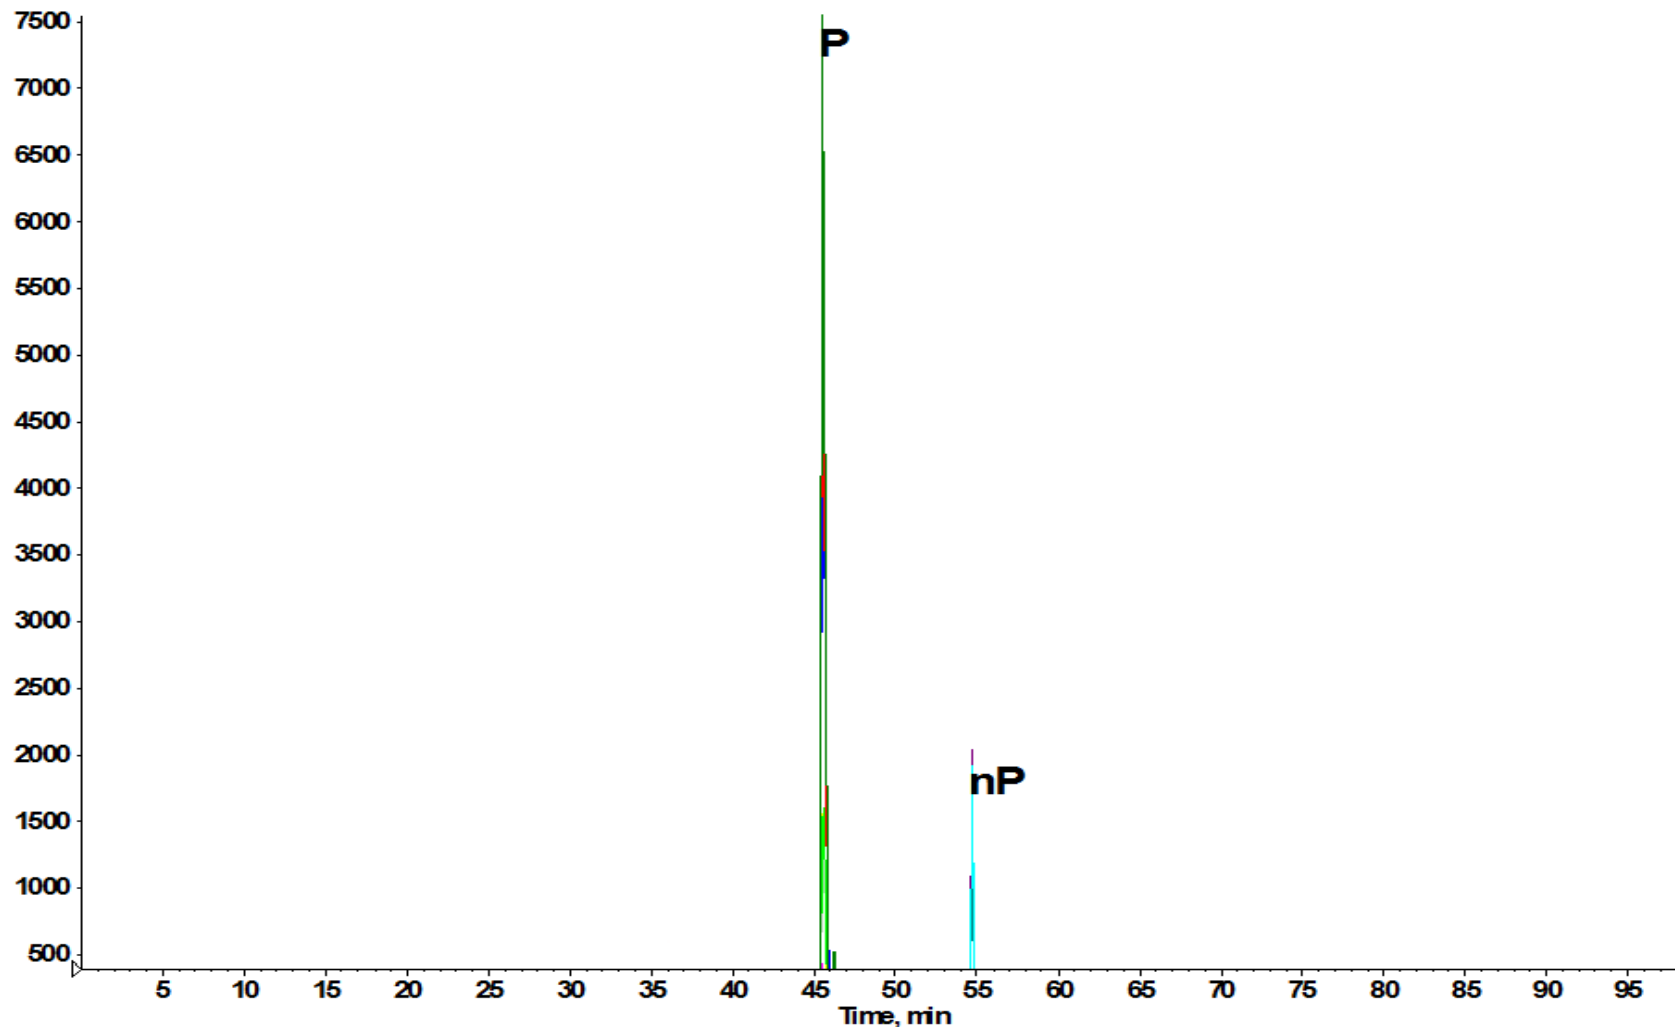

GSGDDDSGTRDDDPNTVVHVR  
GSGDDDS[Pho]GTRDDDPNTVVHVR

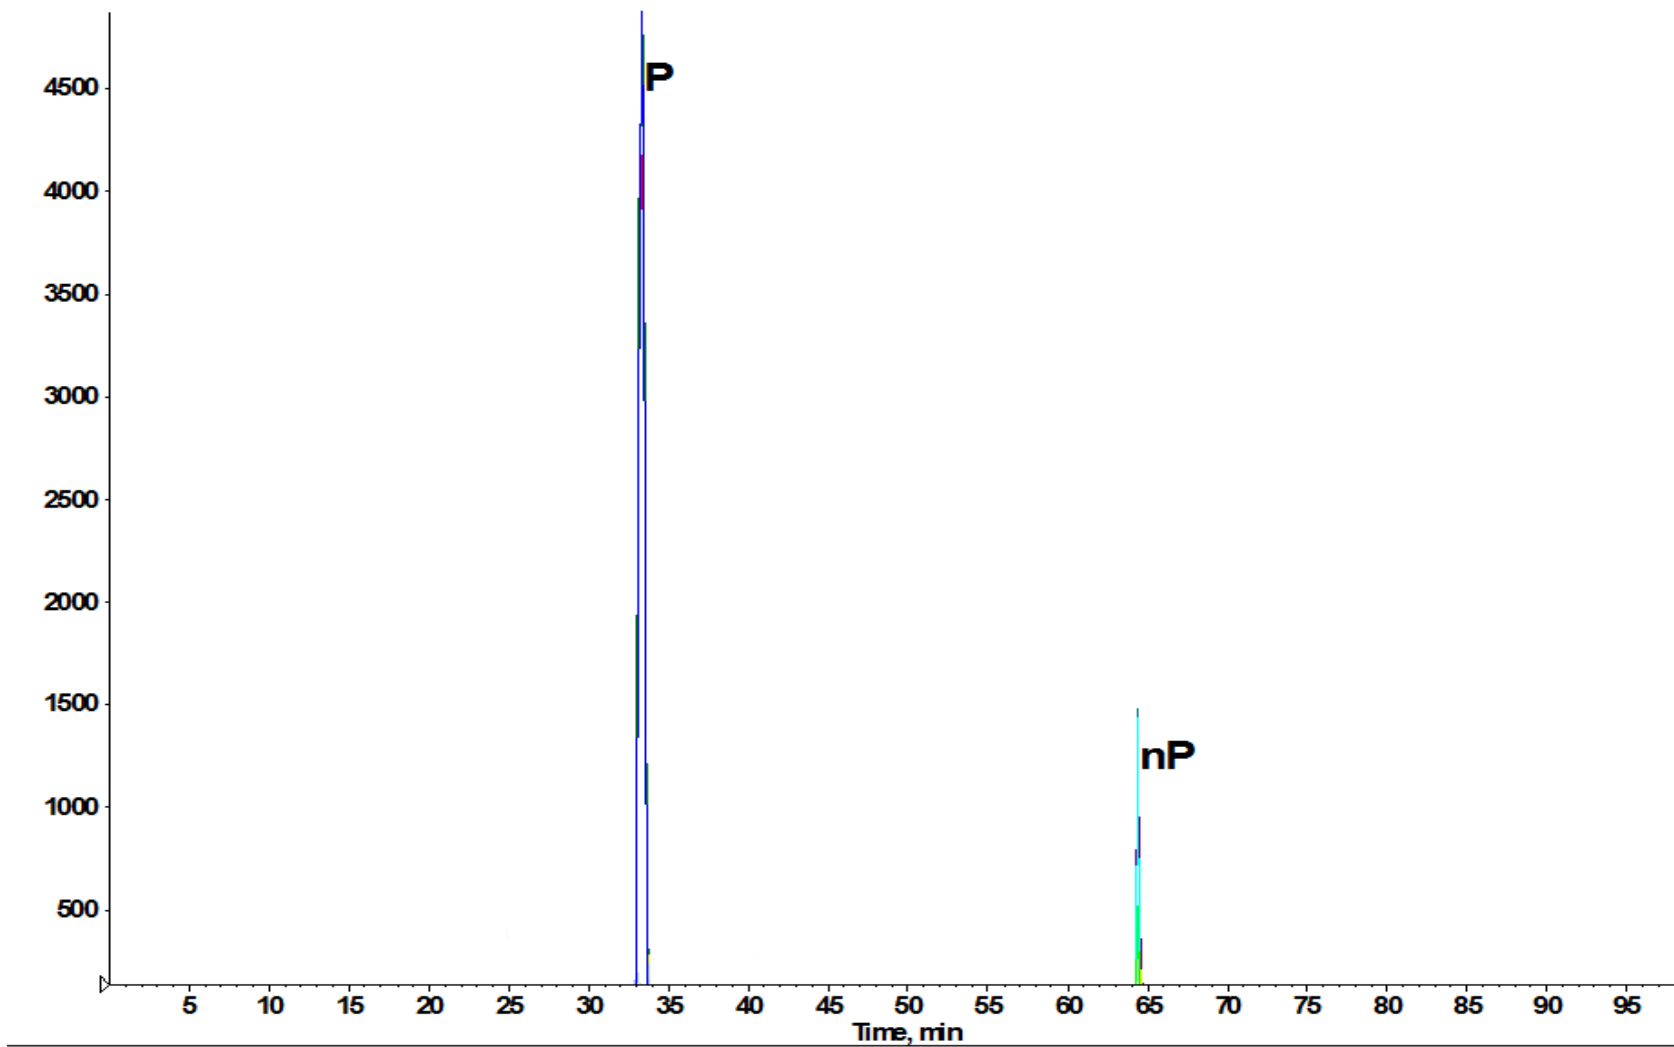

KSGDDDSGTRDDDPPNTVVHVR  
KGS[Pho]GDDDSGTRDDDPPNTVVHVR

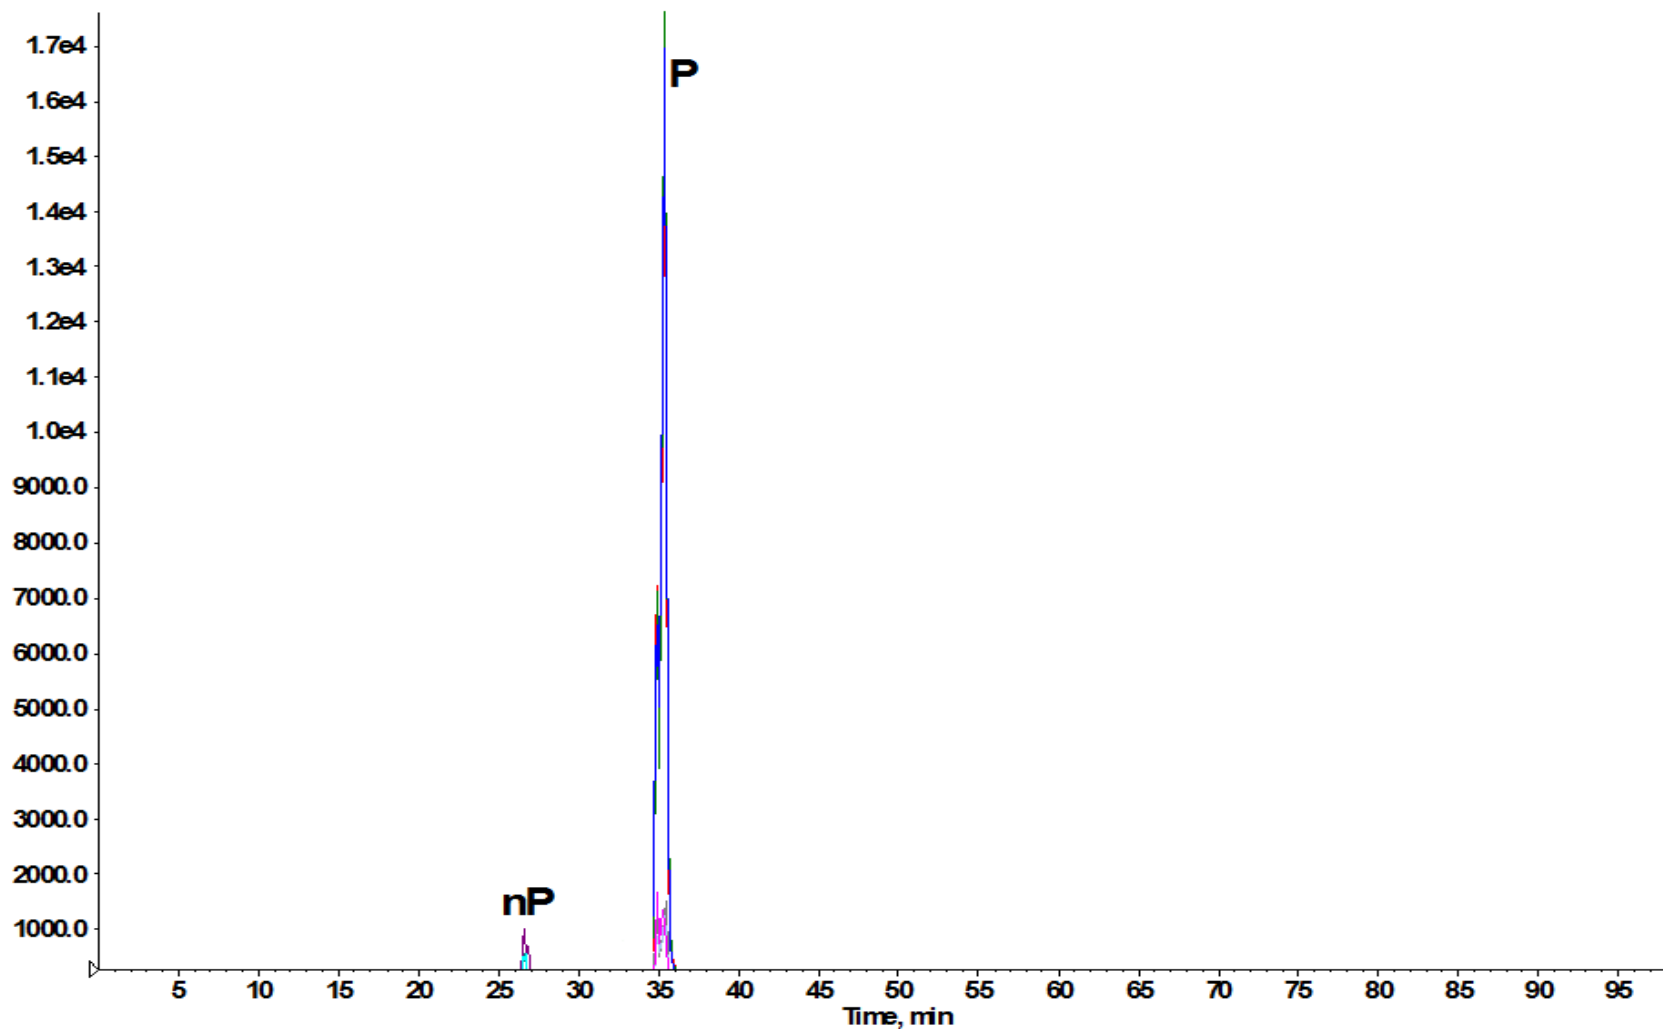

Name: SACE\_3268

APARRPAASR  
APARRPAAS[Pho]R

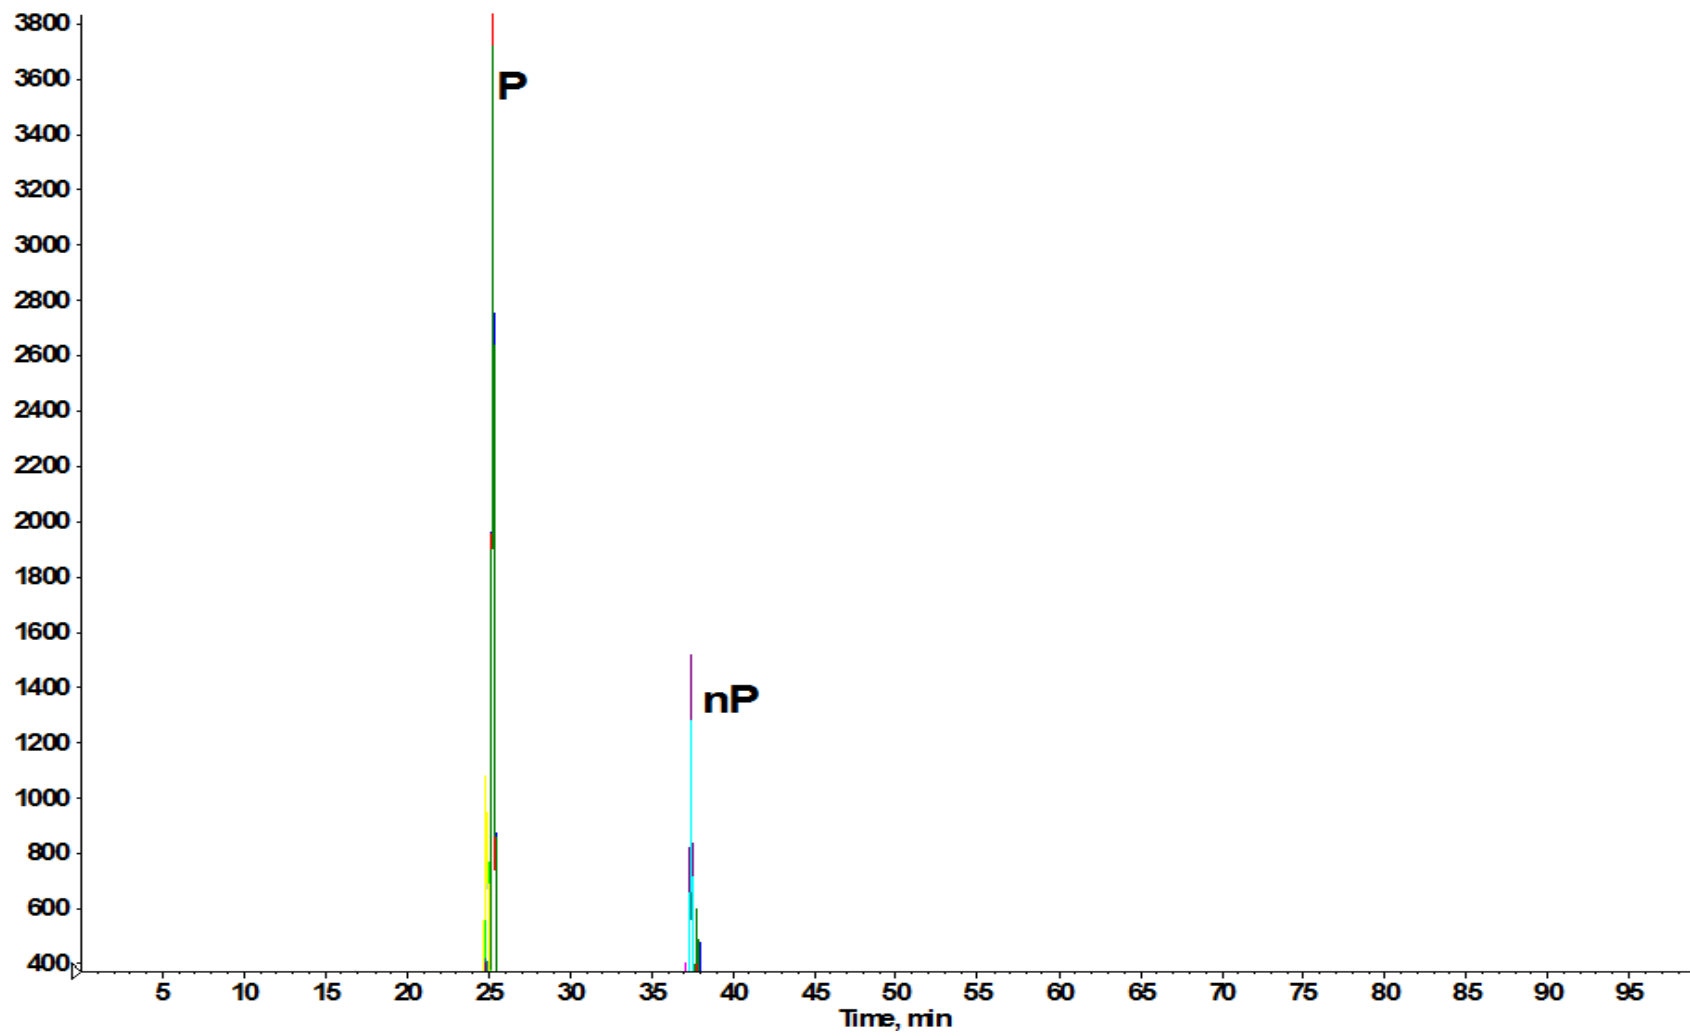



Name: SACE\_3448

HVAERHPLSLRMHTEER

HVAERHPLS[Pho]LRMHTEER

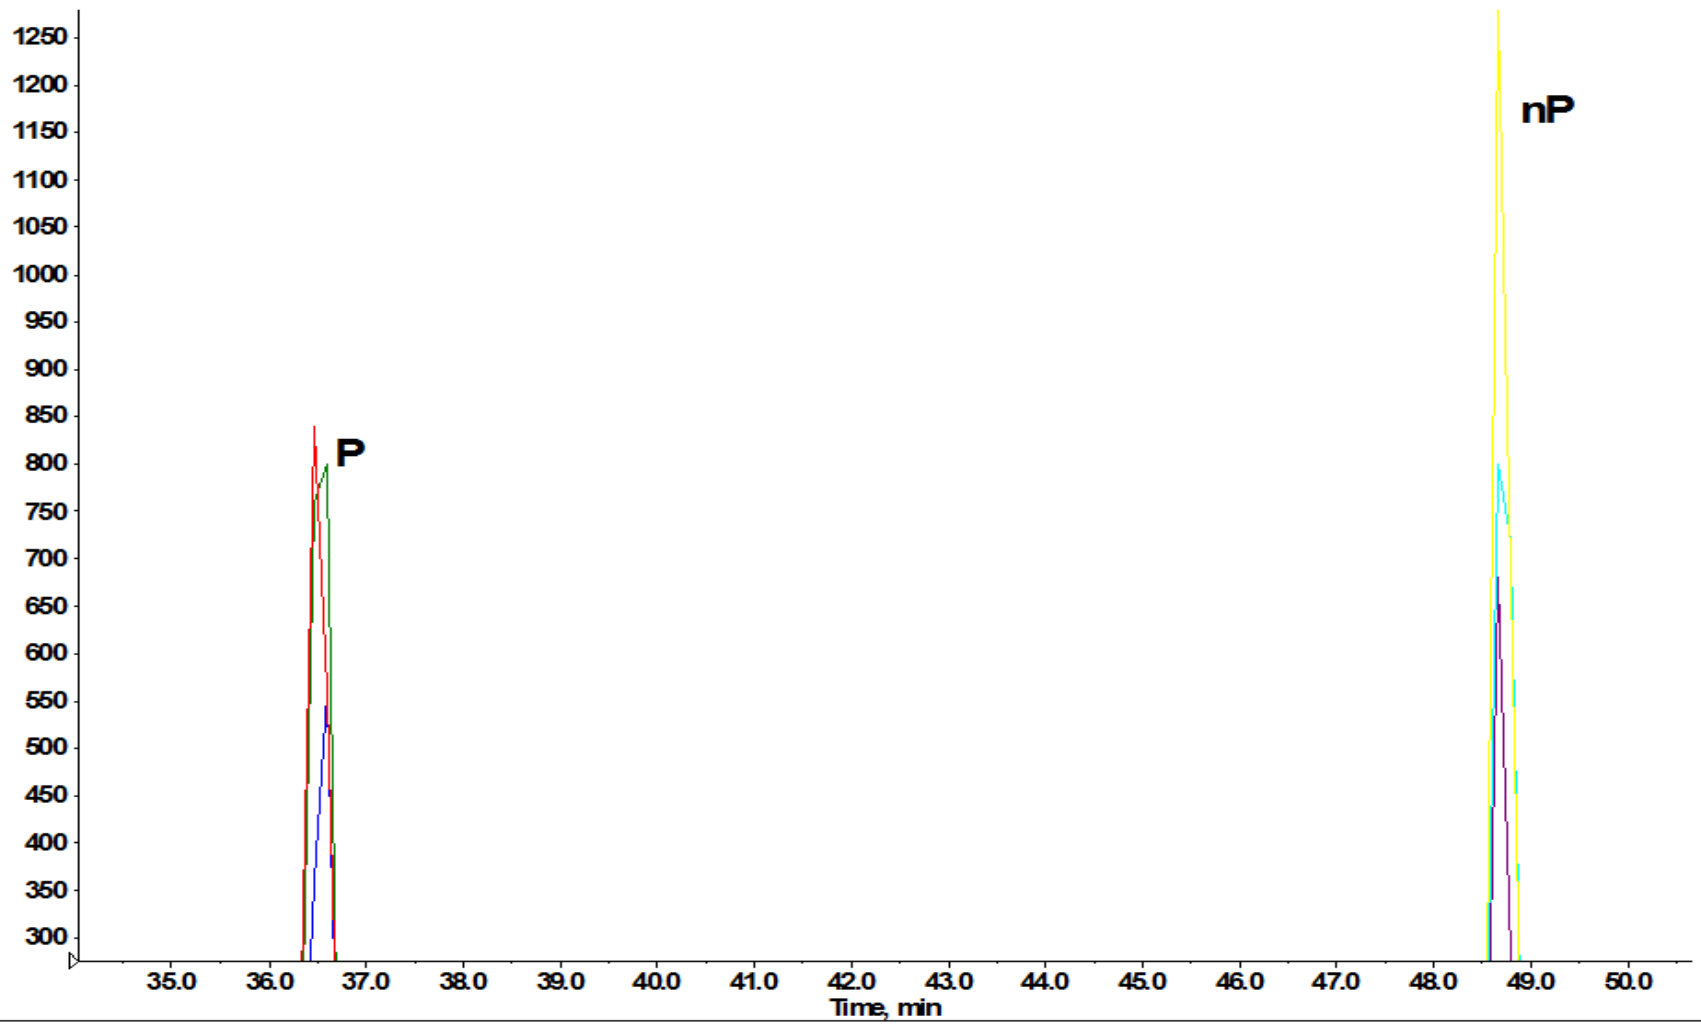

Name: SACE\_3776

DHSRAMRLSR  
DHSRAMRLS[Pho]R

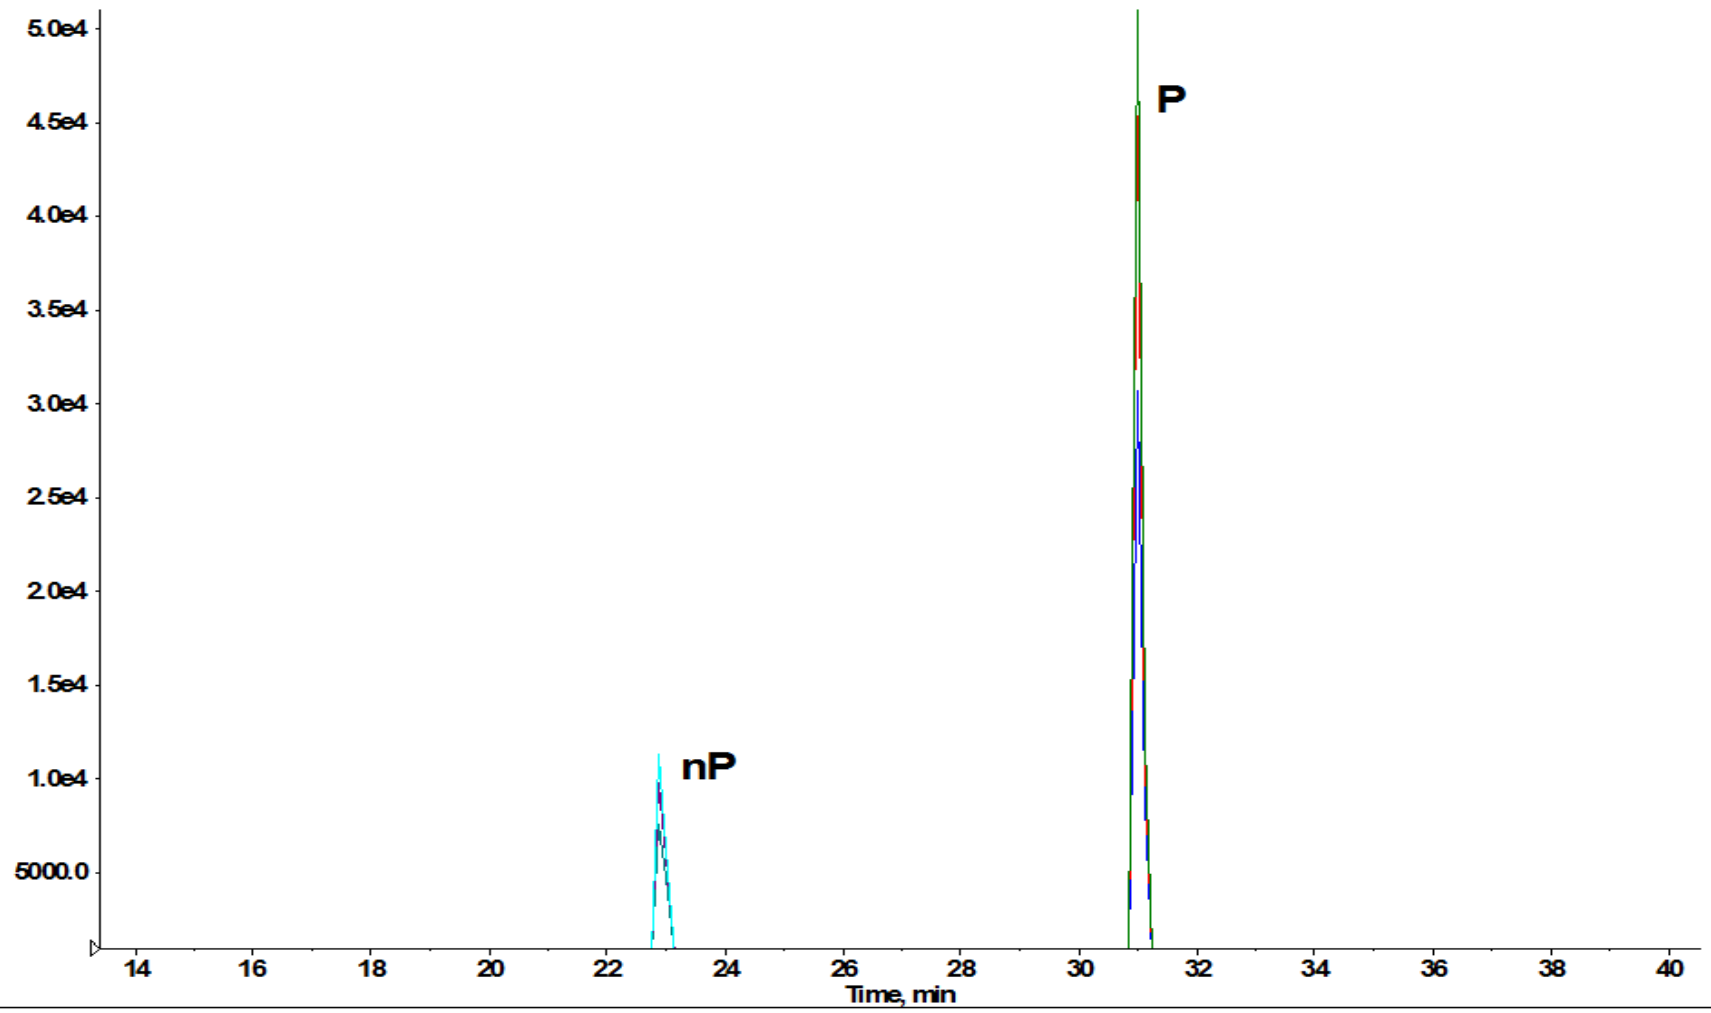

Name: SACE\_4206

GGTAPGLRGGDAAVAWR

GGT[Pho]APGLRGGDAAVAWR

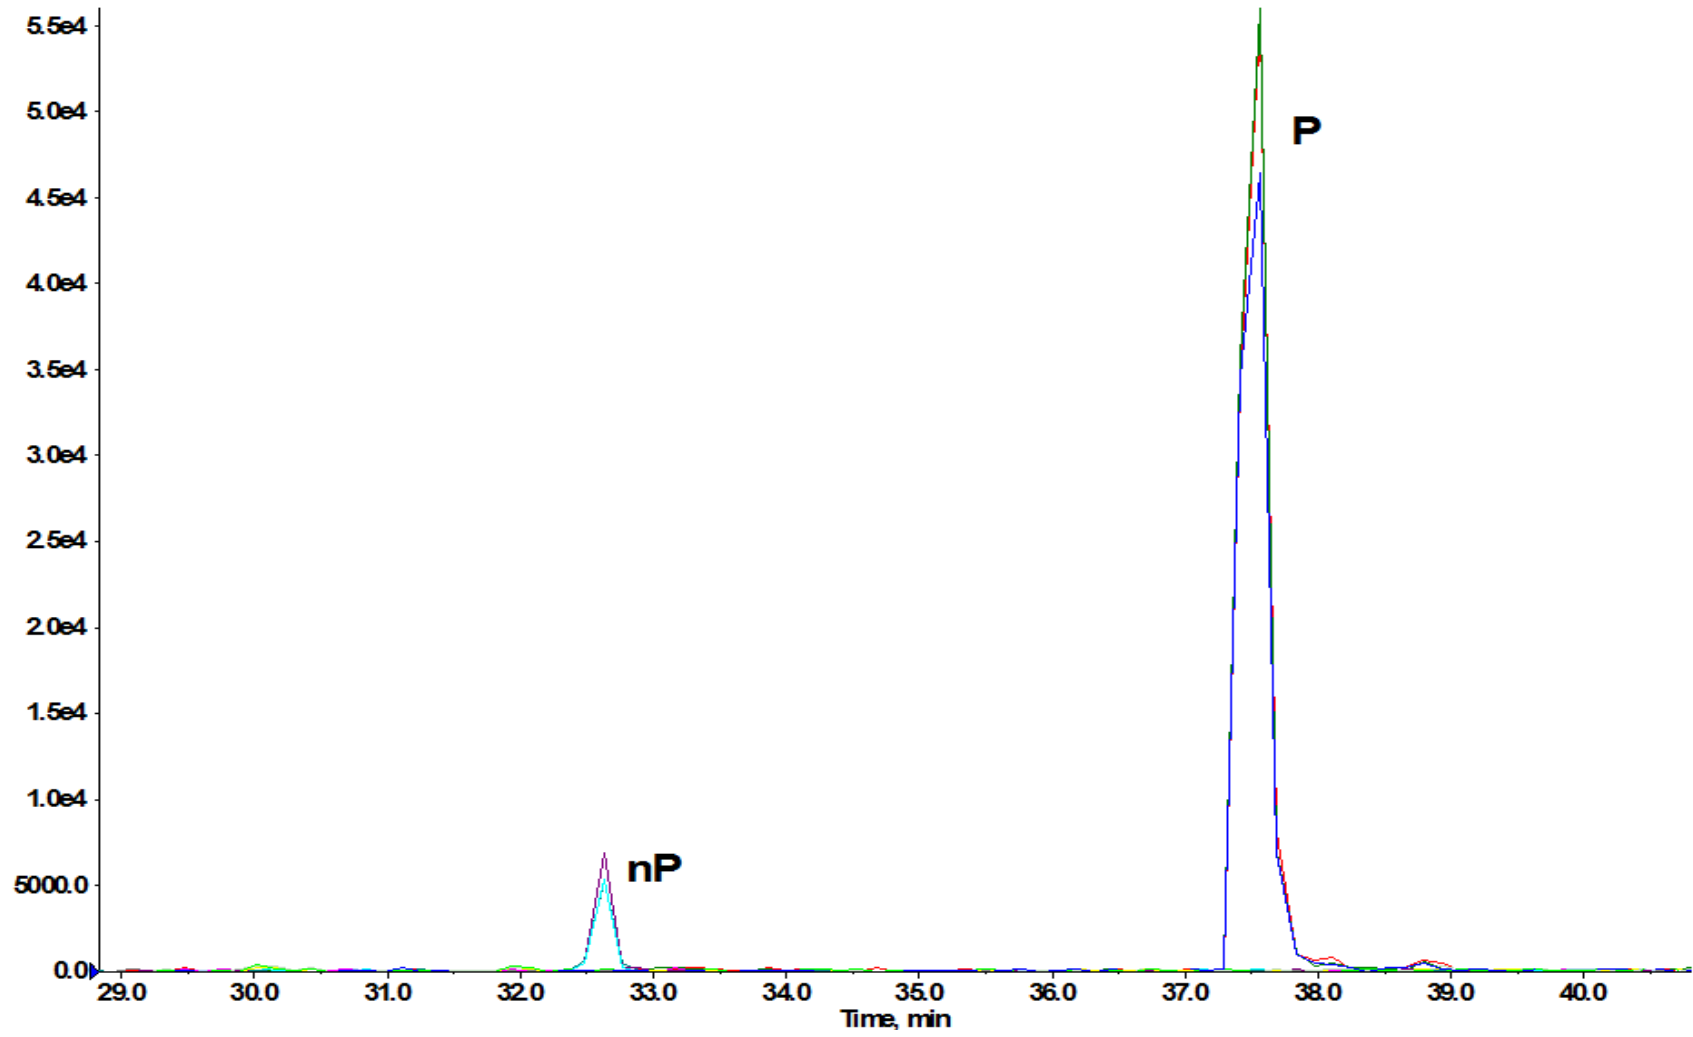

Name: SACE\_4237

RAMAQTTVIVAGGATNK  
RAMAQTT[Pho]VIVAGGATNK

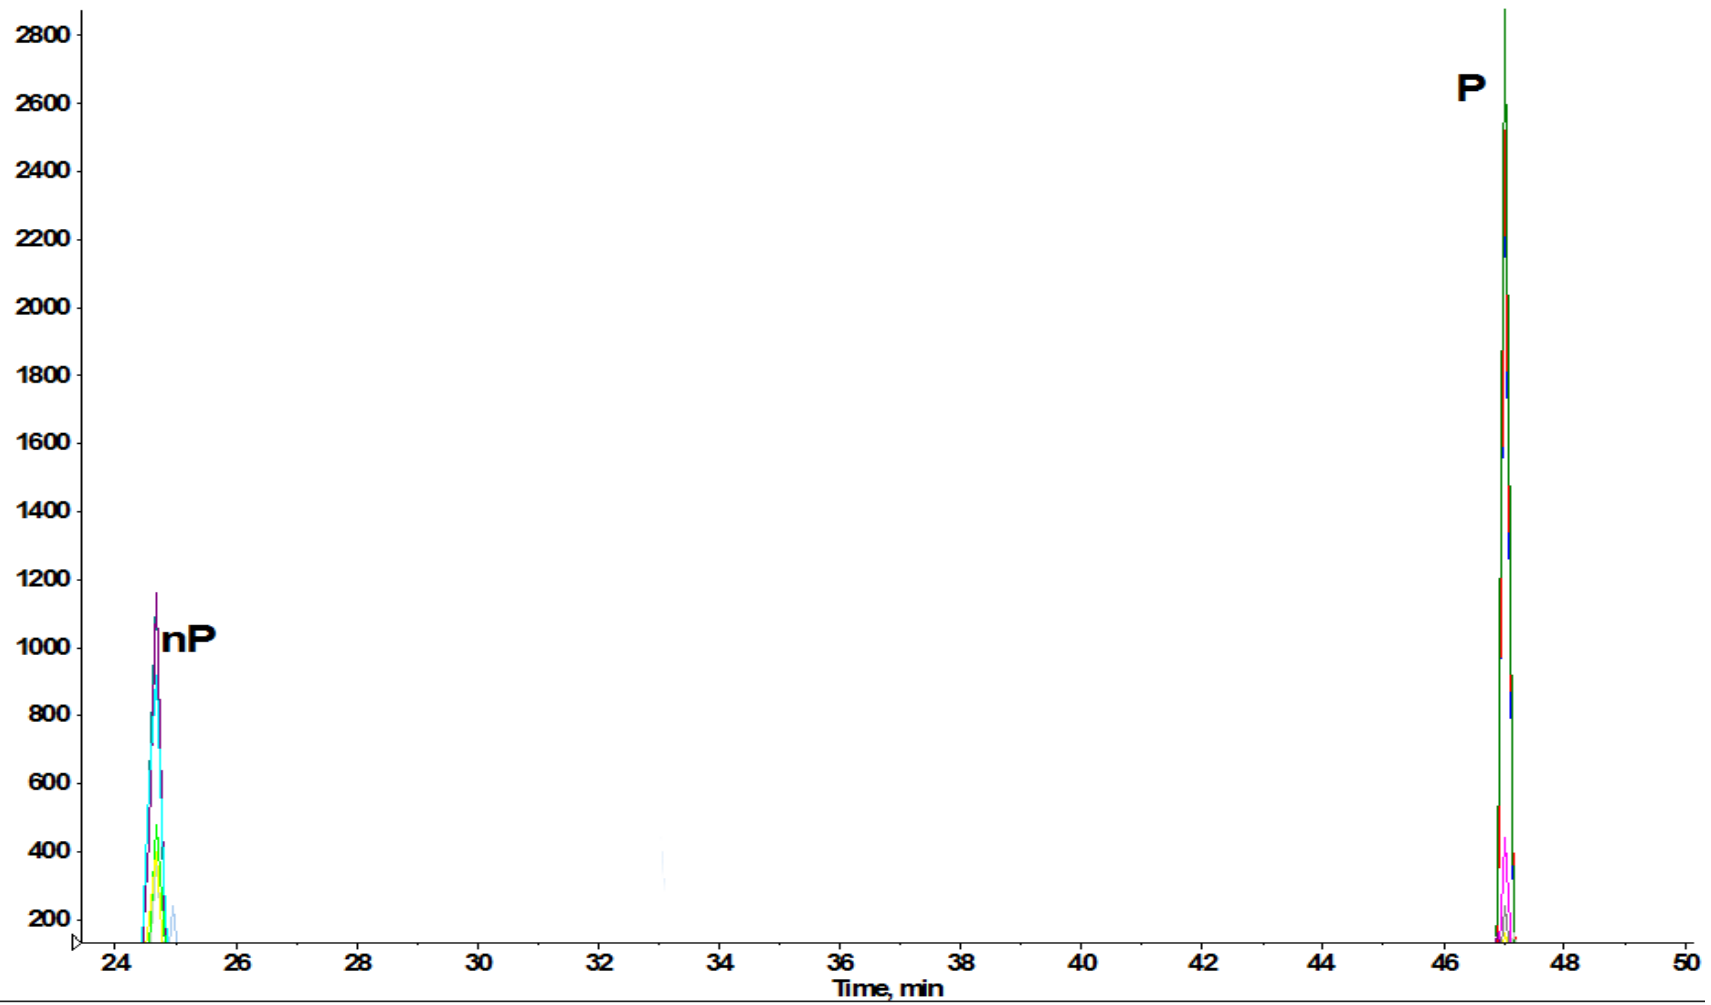

Name: SACE\_4660

GRPGASAATRER

GRPGAS[Pho]AATRER

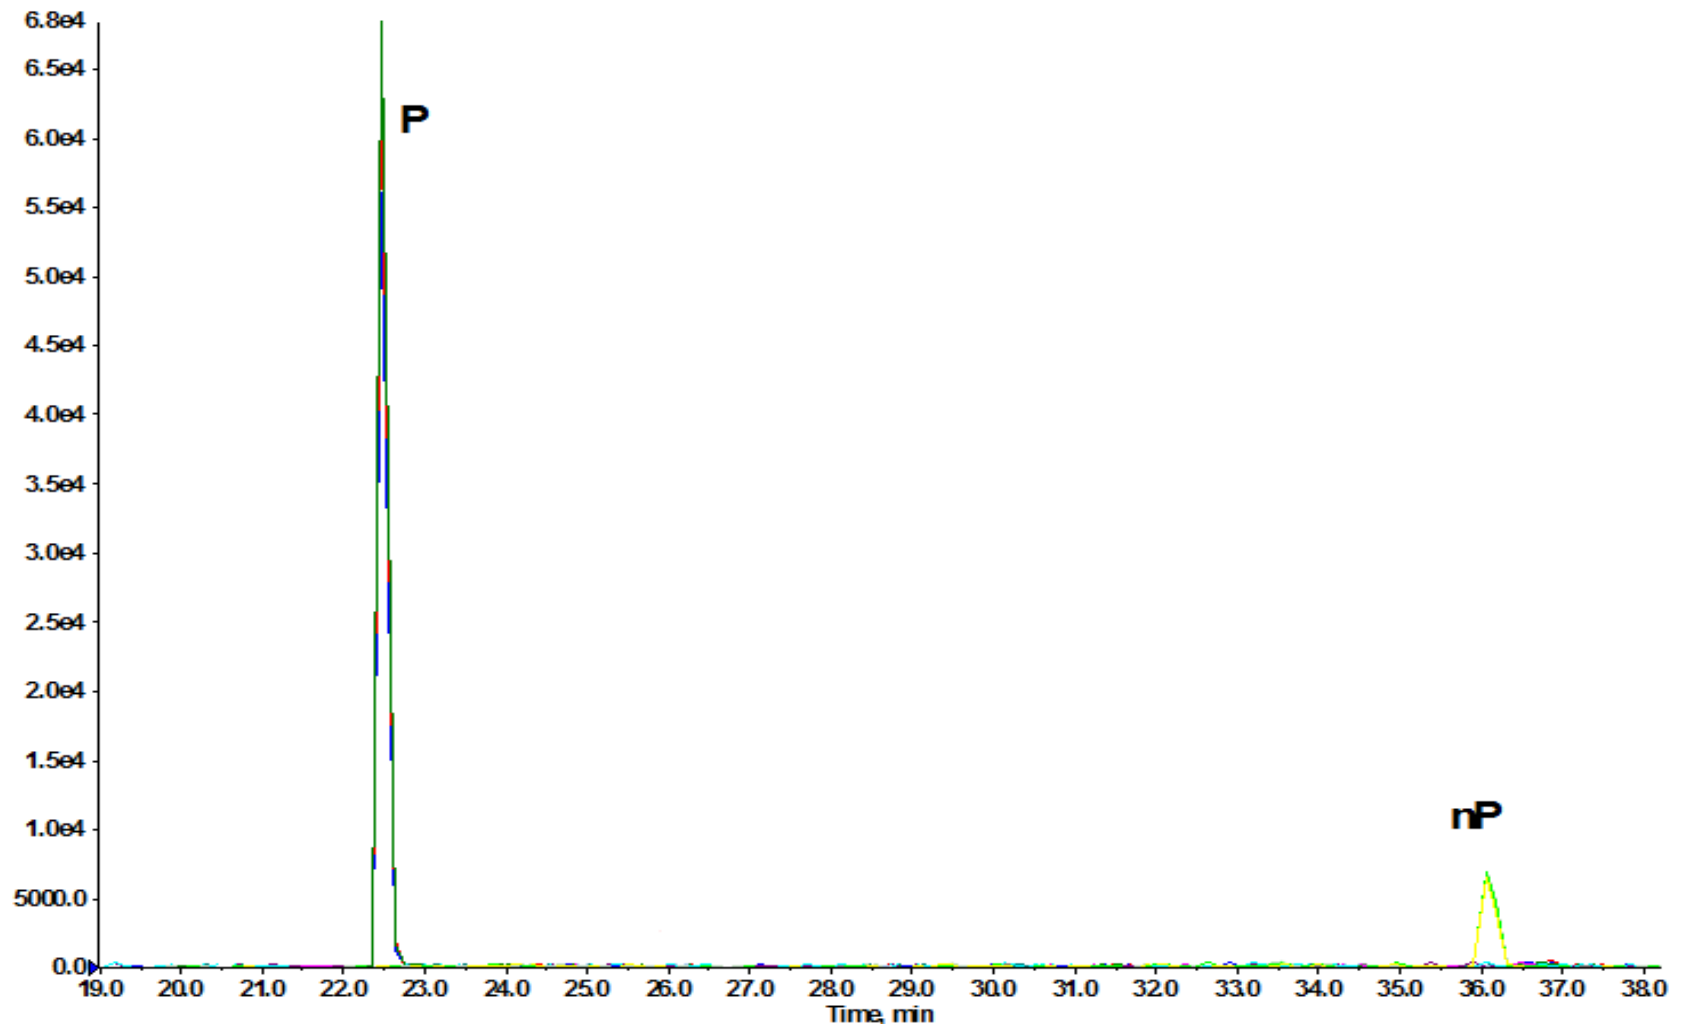

Name: SACE\_5370

ASGGGRSTTDRSGR

ASGGGRSTTDRS[Pho]GR

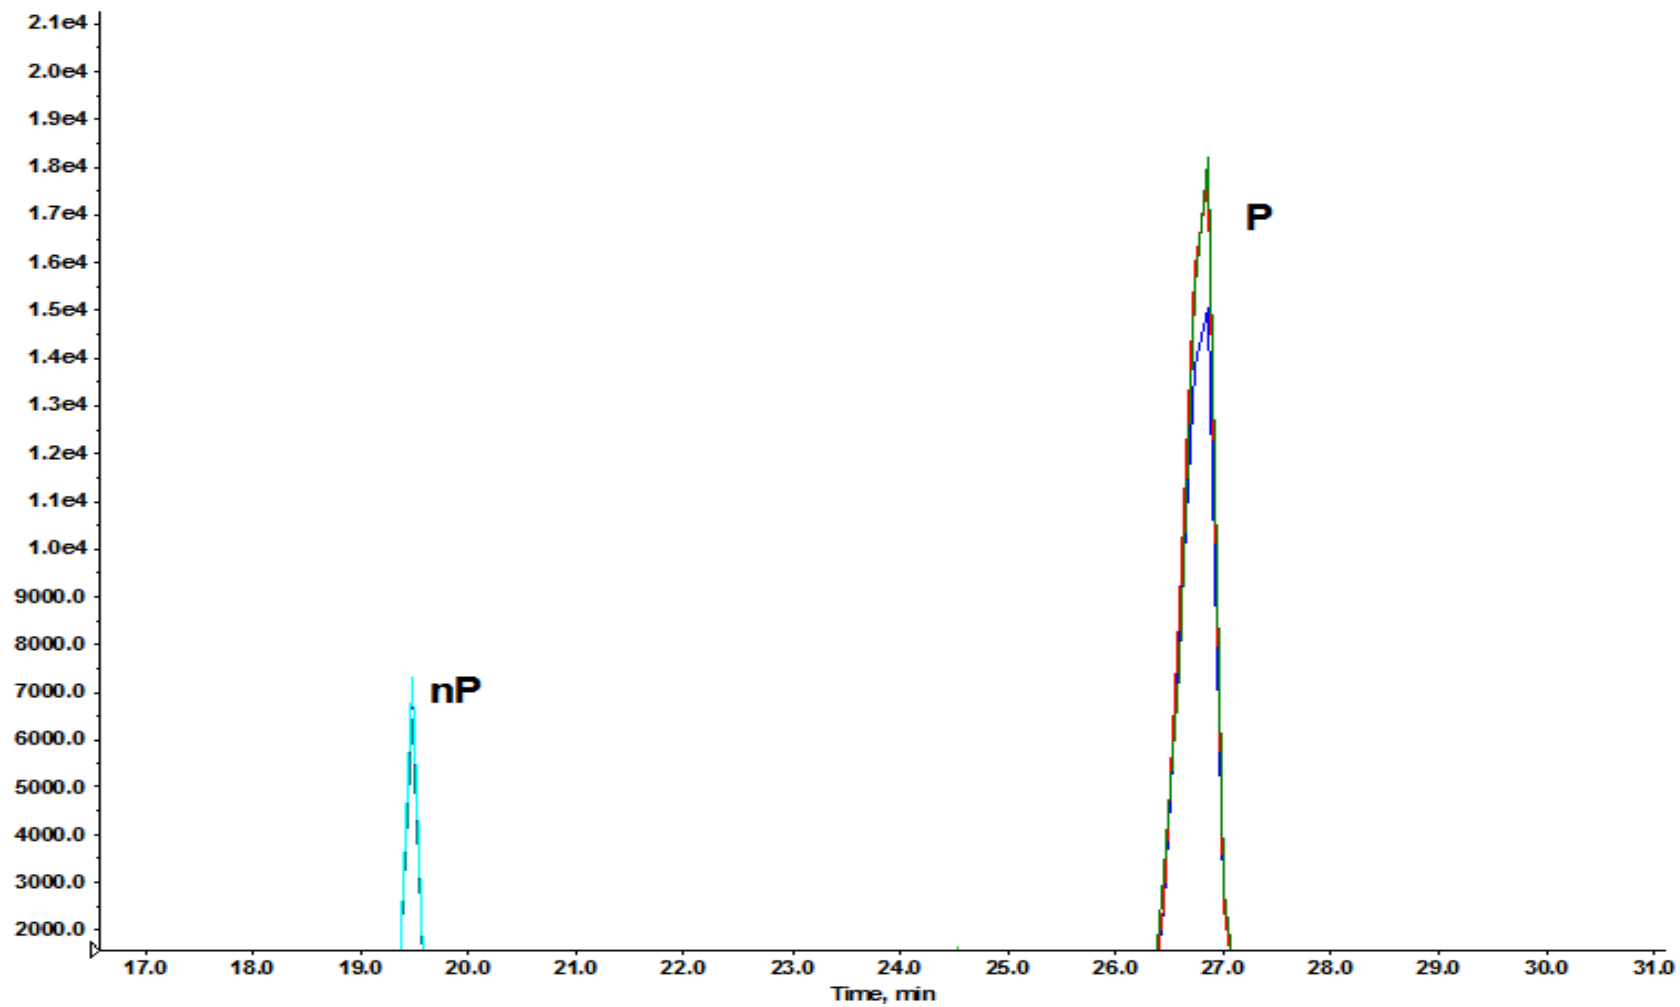

Name: SACE\_5822

RYDAEADAPTPPVGLPLGAGAGR  
RYDAEADAPT[Pho]PPVGLPLGAGAGR

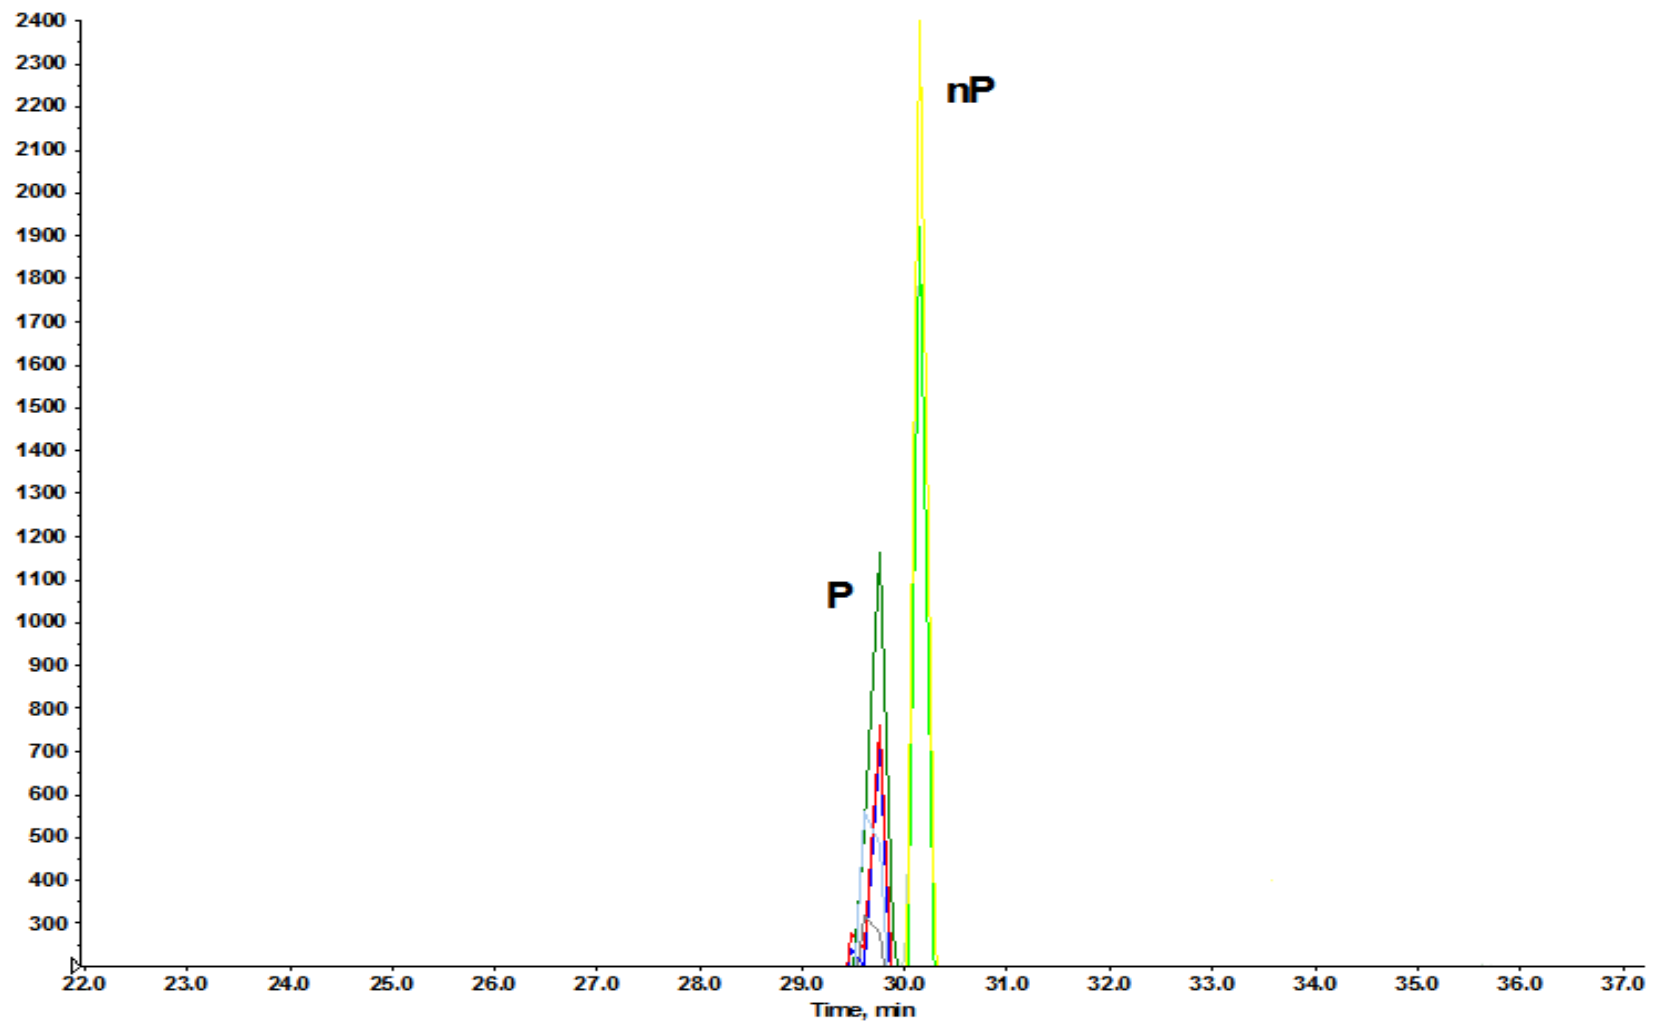

Name: SACE\_5832

AVTDTGSHFNLSK

AVTDT[Pho]GSHFNLSK

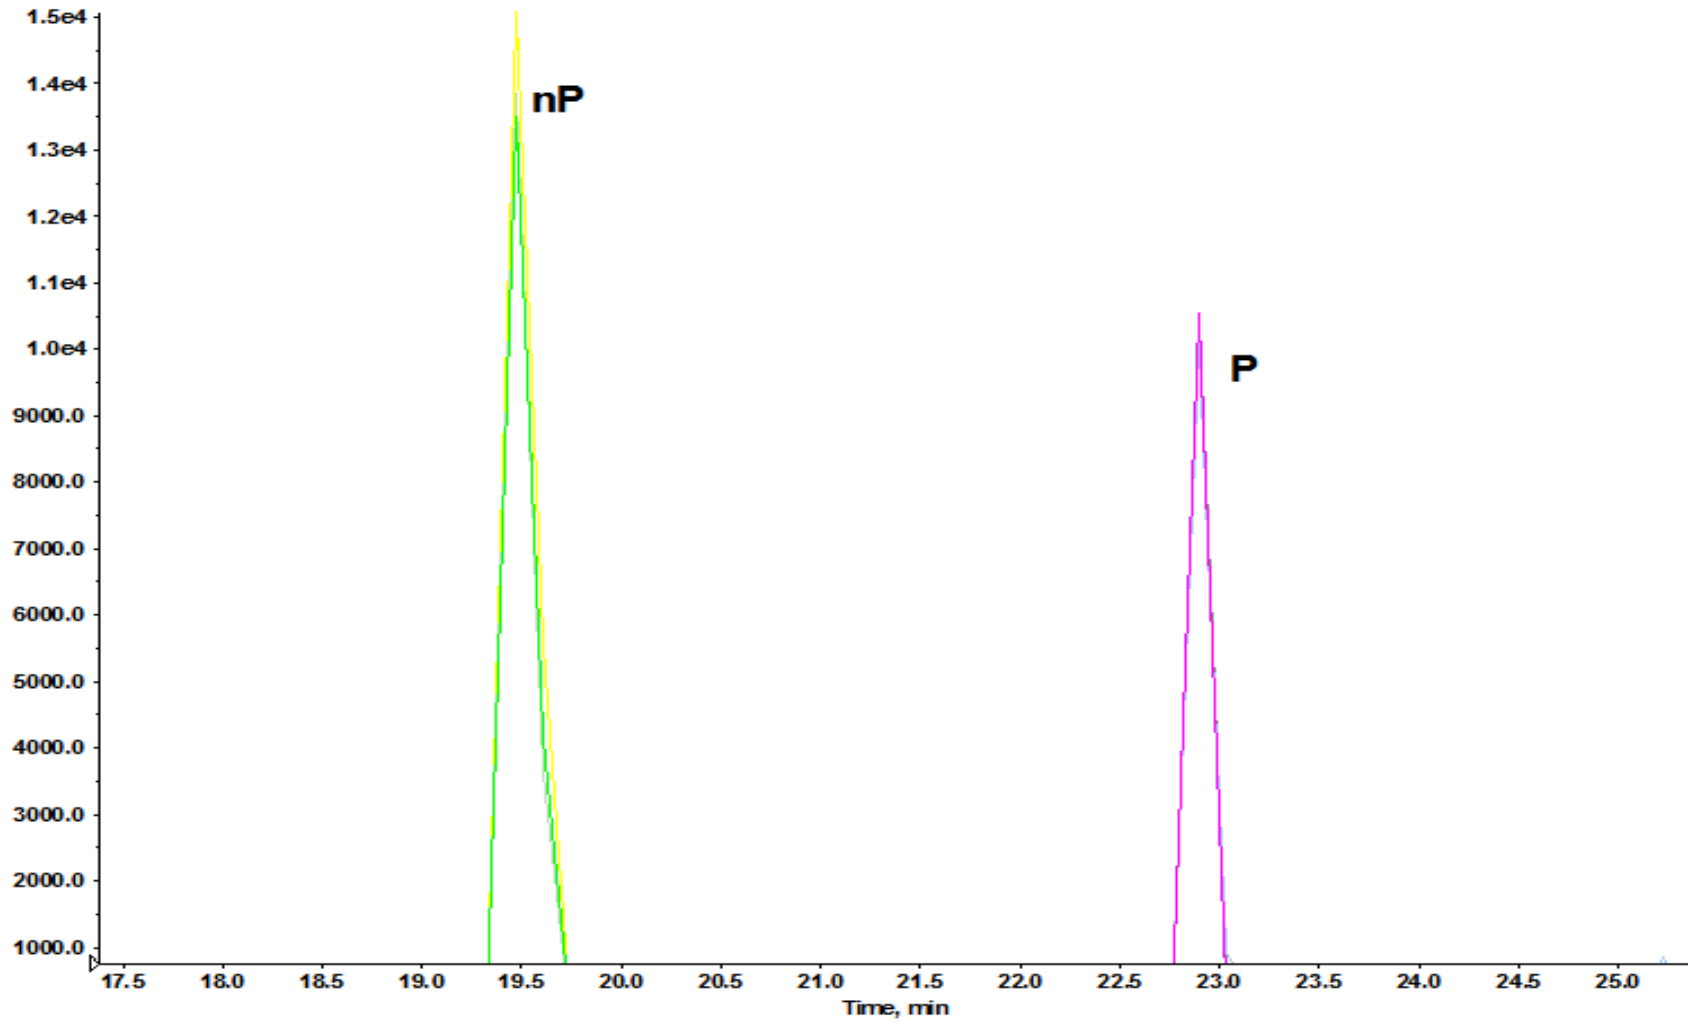



Name: SACE\_6254

TTVHRRFASR  
TTVHRRFAS[Pho]R

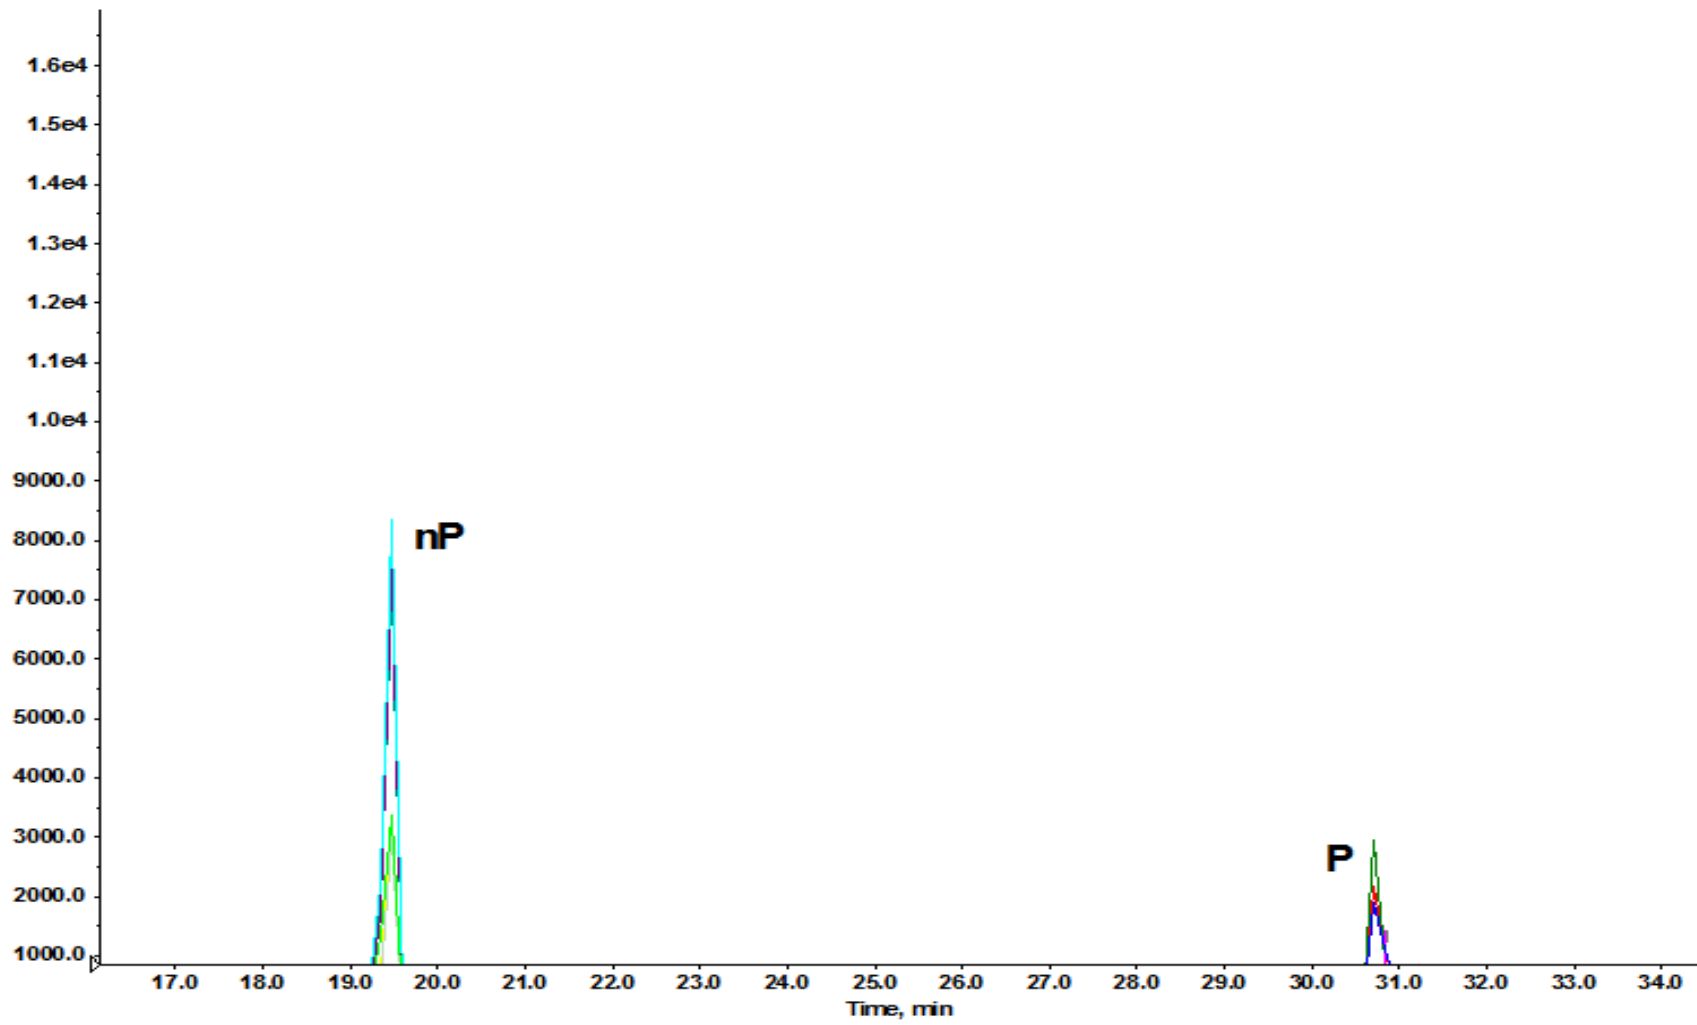

Name: SACE\_6654

MDRPVPPAGPPASPPASPQHPPSPPGGMPAQGGPR  
MDRPVPPAGPPASPPASPQHPPS[Pho]PPGGMPAQGGPR

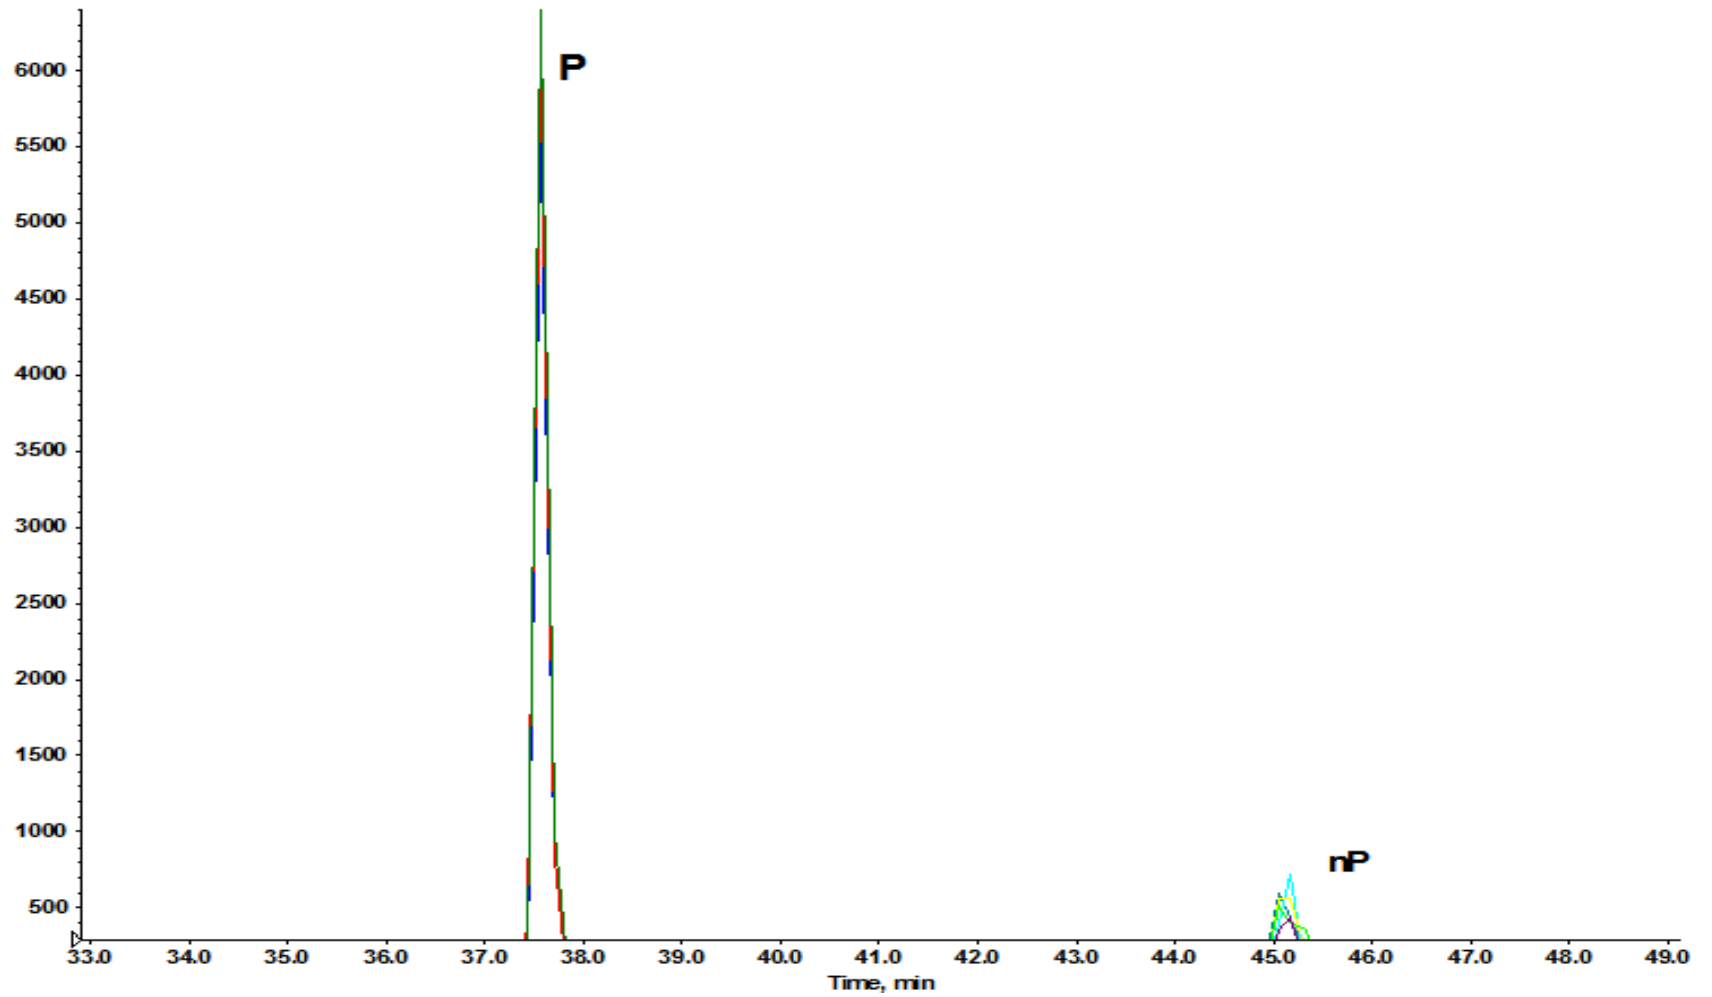

Name: SACE\_6667

PGGPGPQSNPPSGNTGPQPSVGGNQPGGNQPSGNQPGGNQSGGNR  
PGGPGPQS[Pho]NPPS[Pho]GNTGPQPSVGGNQPGGNQPSGNQPGGNQSGGNR

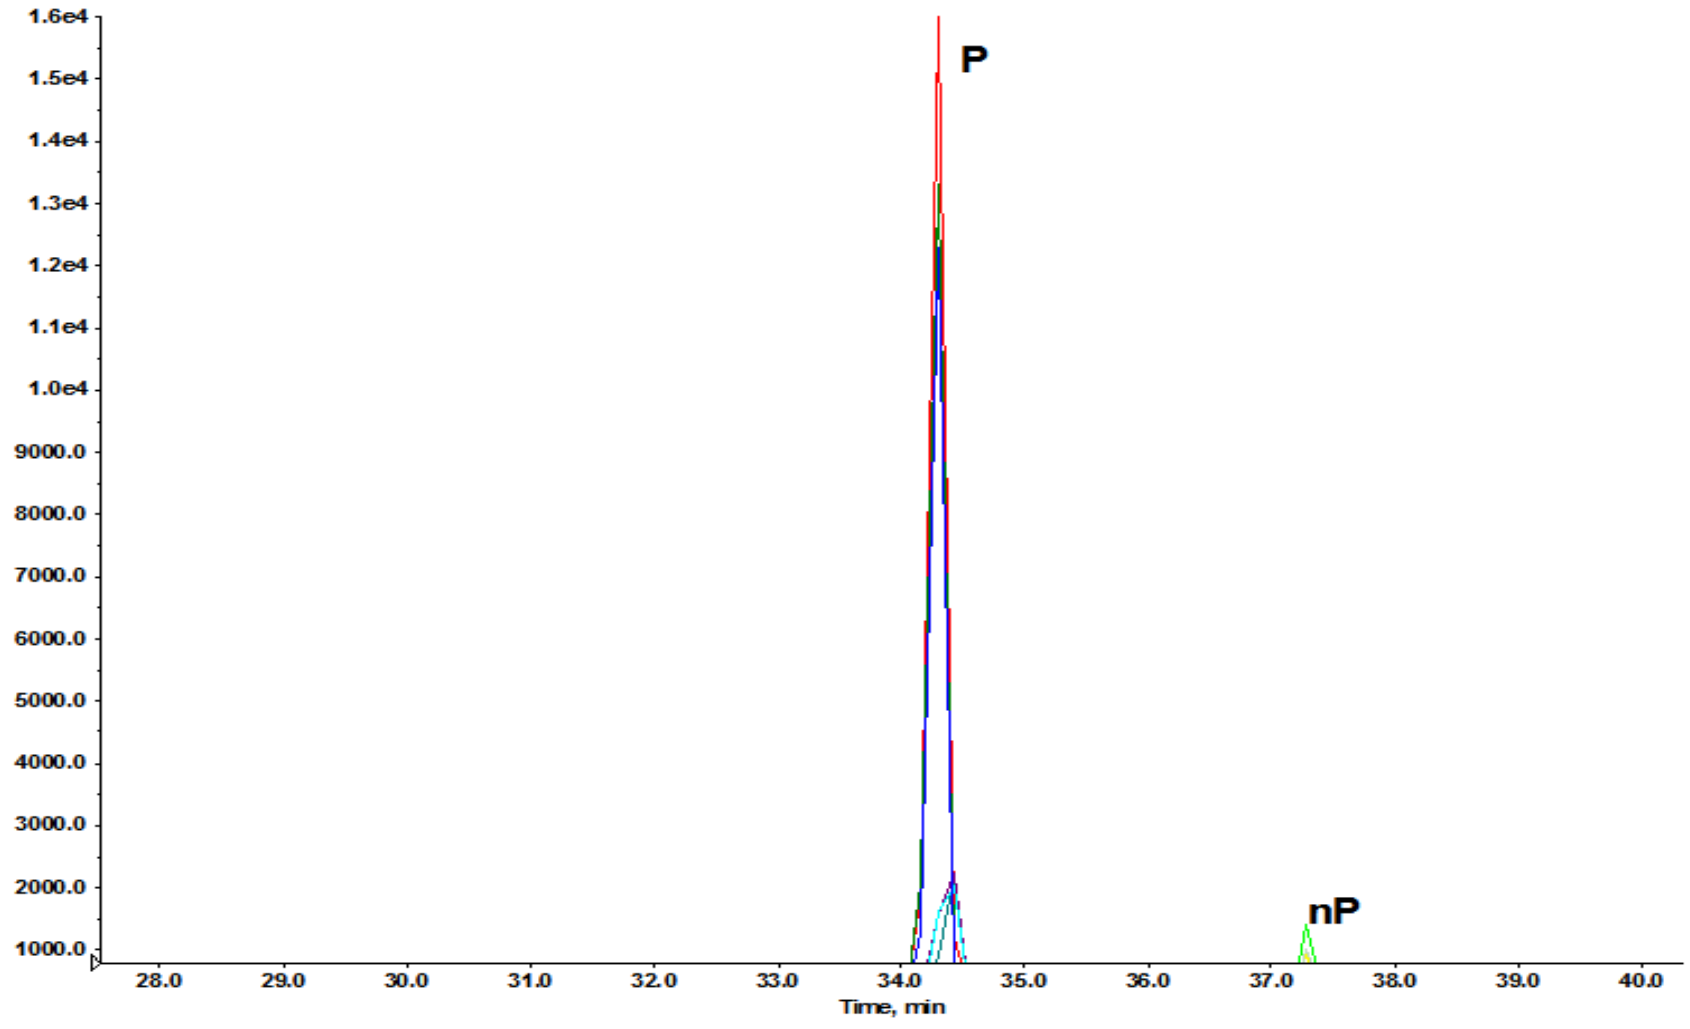

Name: SACE\_6713

GLKLSGAGPRAR

GLKLS[Pho]GAGPRAR

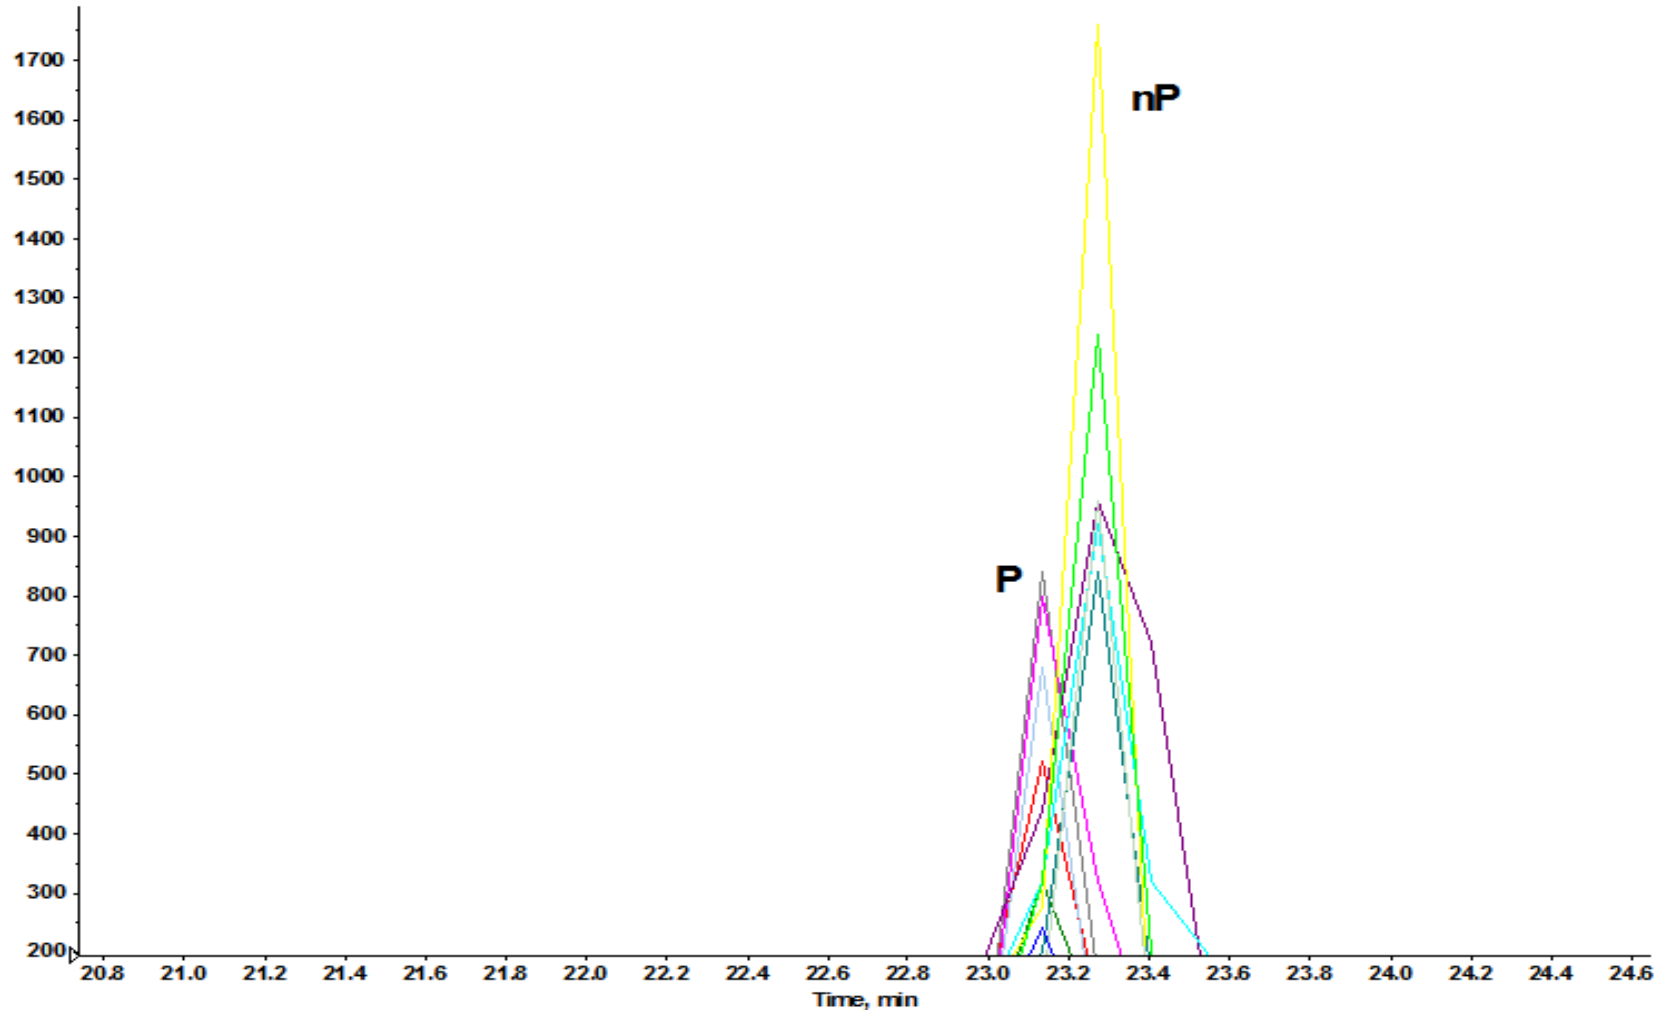

Name: SACE\_6793

TGTTVFSRVTVVAPTTR

TGTT[Pho]VFSRVTVVAPTT[Pho]R

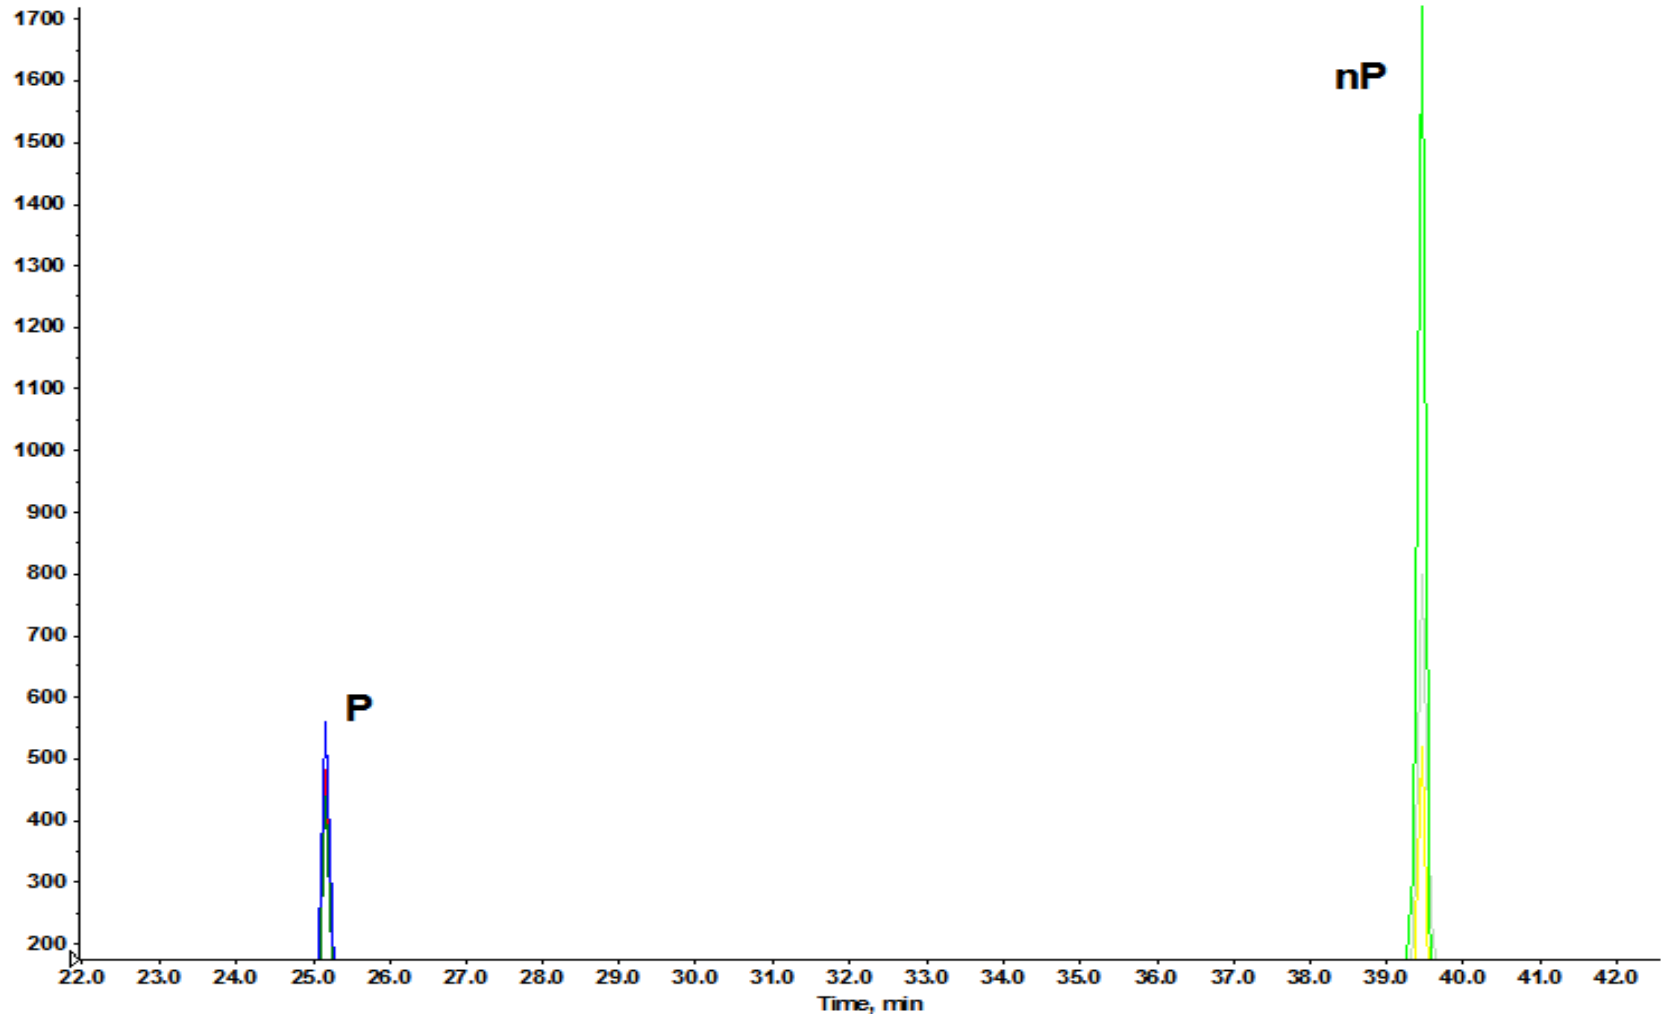

Name: SACE\_7107

NGCGAPQQGTTTVAADTDQVVVTGK  
NGCGAPQQGT[Pho]TTVAADTDQVVVTGK

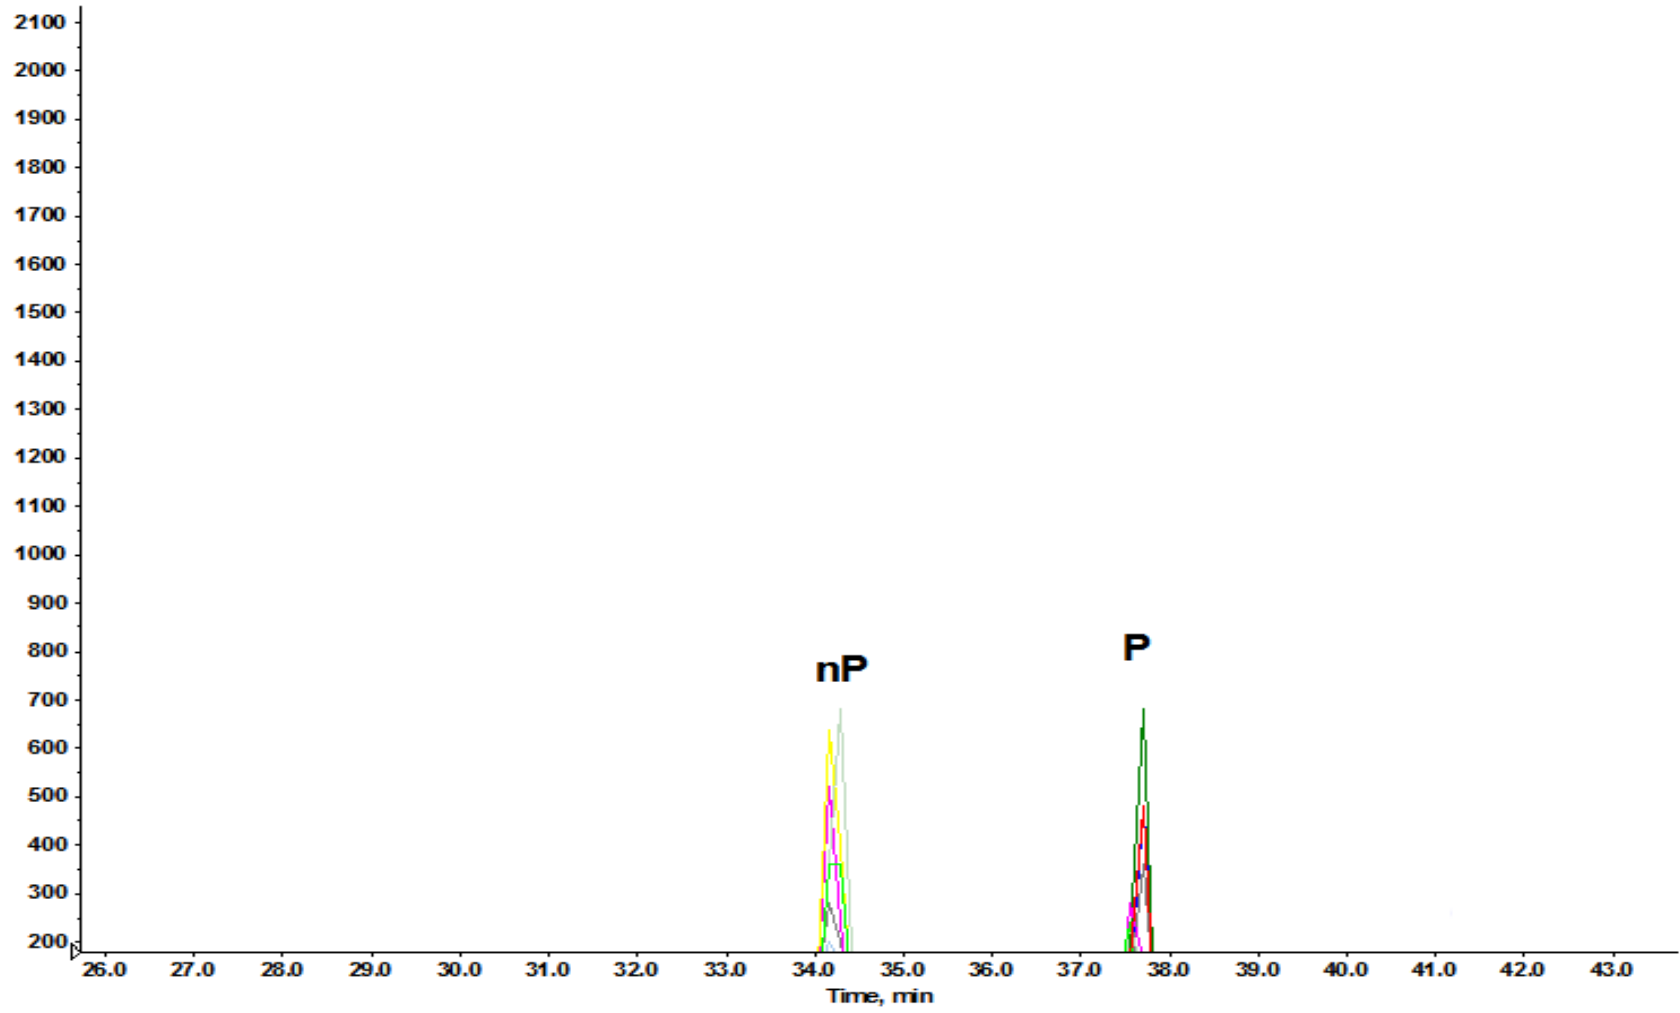

Name: SACE\_7119

SDEDRDDSYDDGYDDYRR  
SDEDRDDS[Pho]YDDGYDDYRR

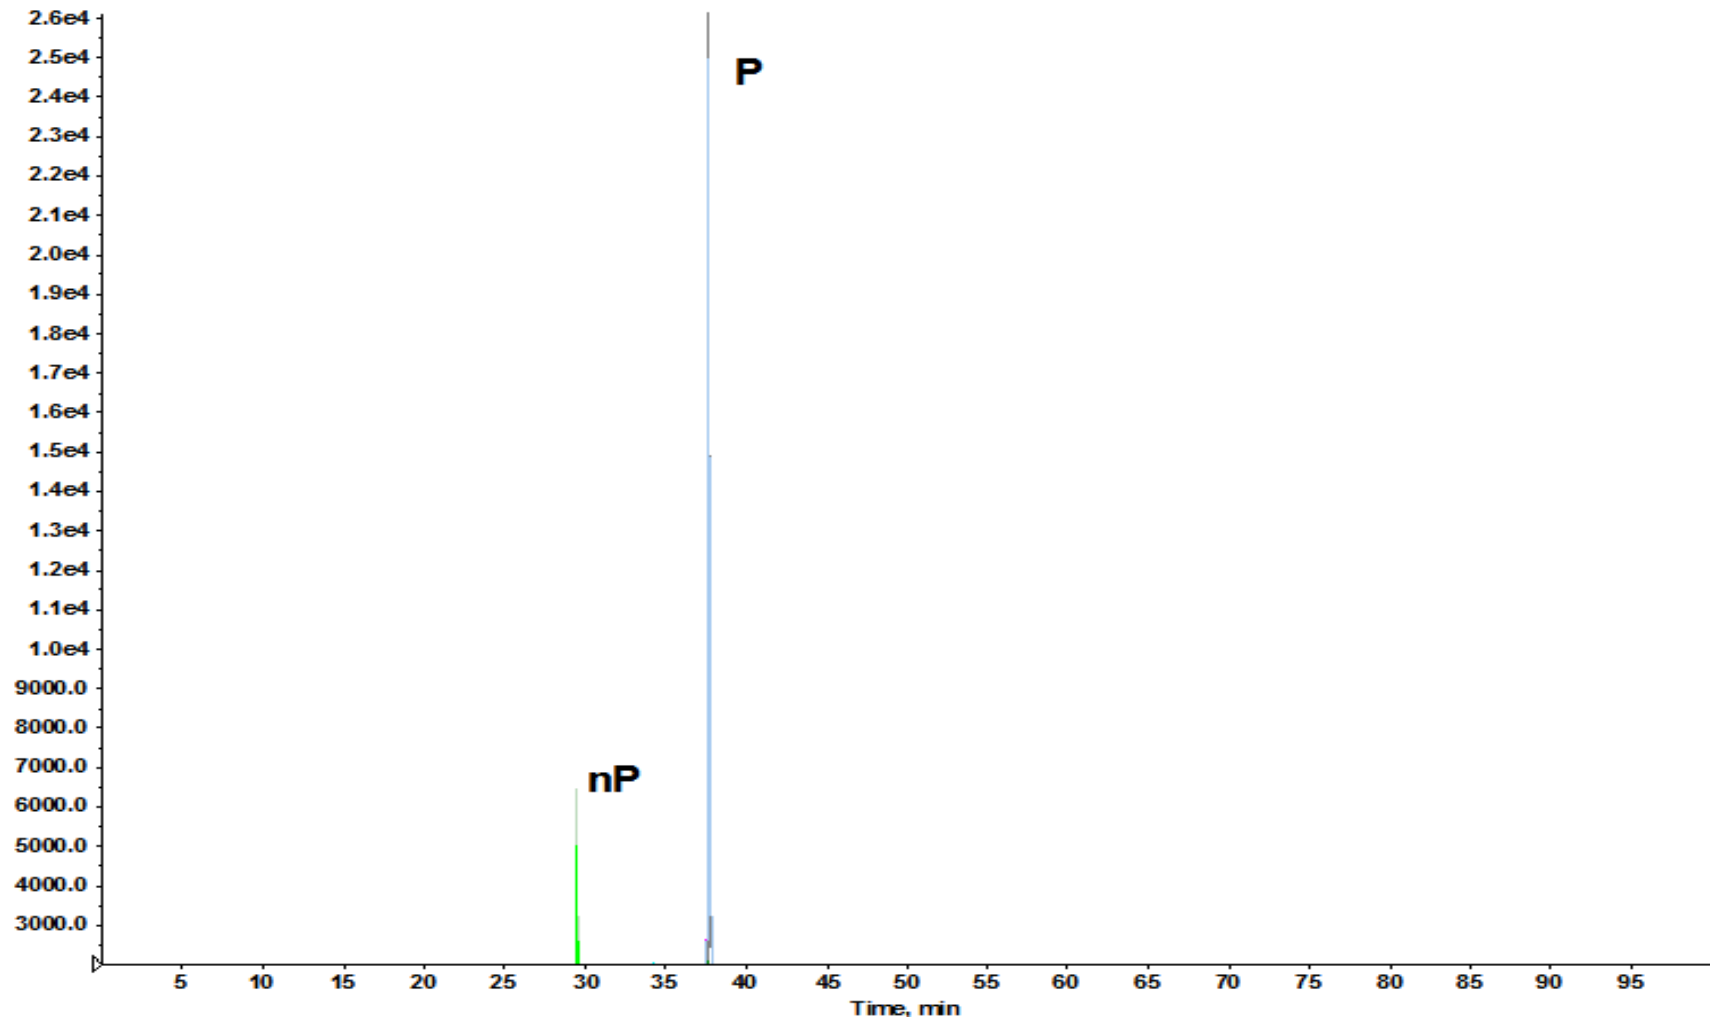

Name: SACE\_7320

MPVDRPTPSRPESDAEKTMR

MPVDRPTPSRPESDAEKT[Pho]MR

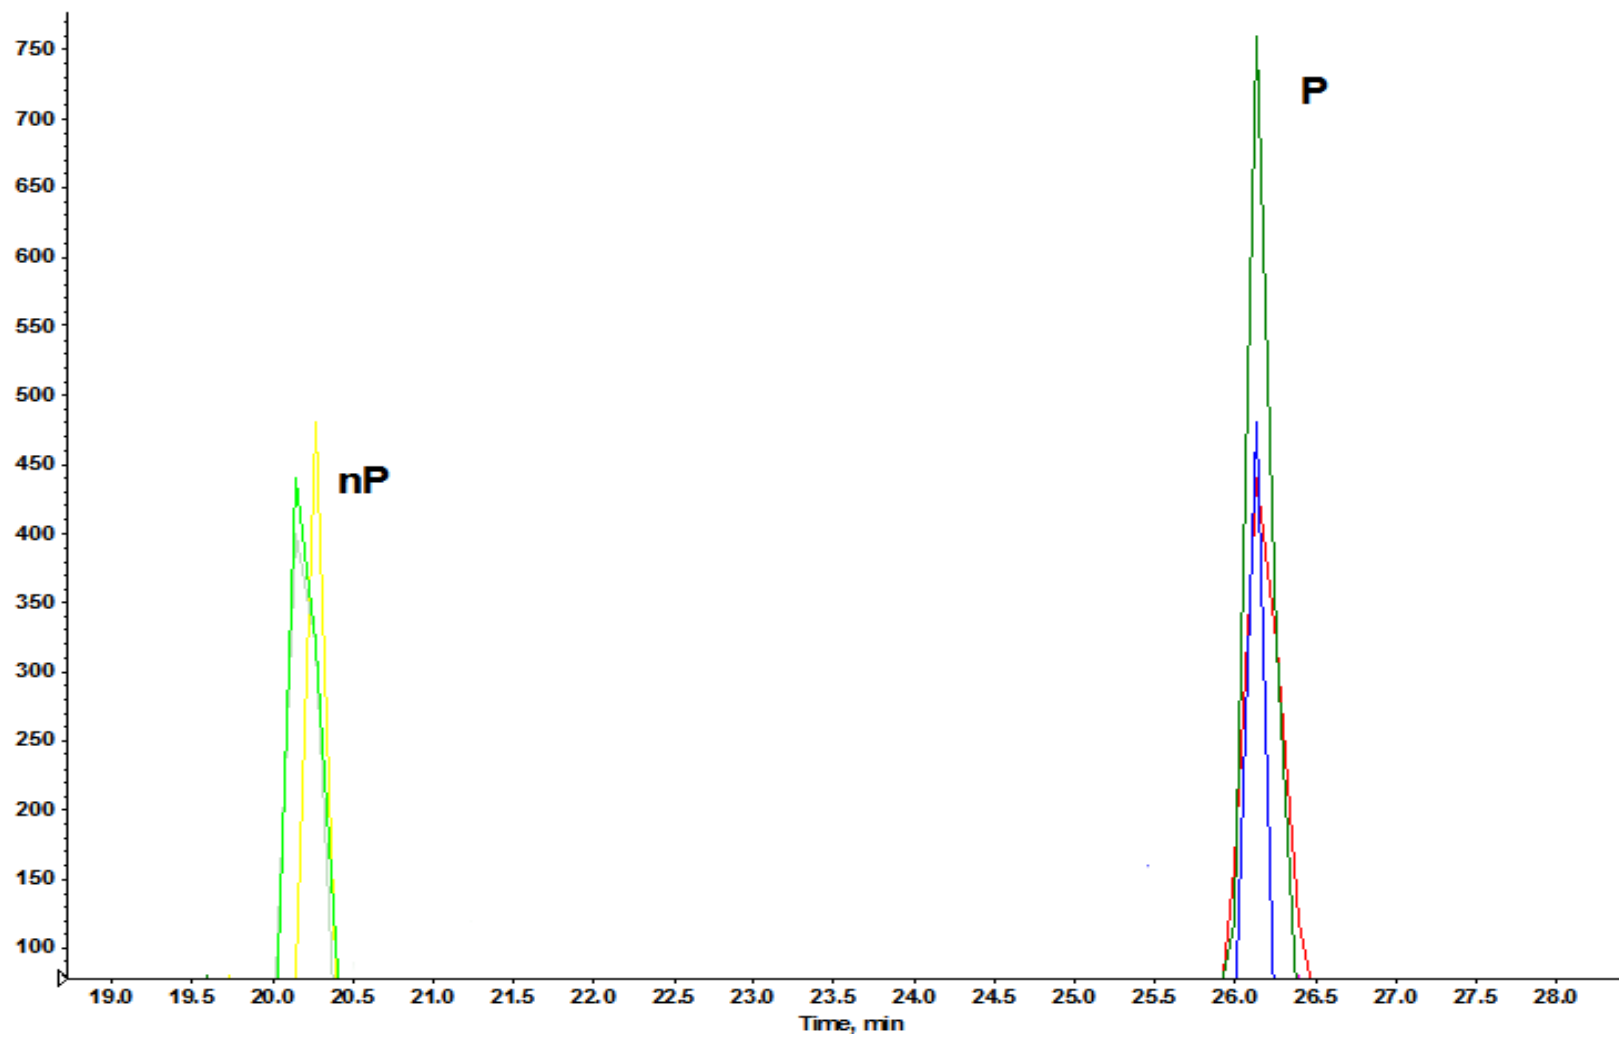



Name: SACE\_6385

SVIDDPTQPDPASVR  
SVIDDPT[Pho]QPDPASVR

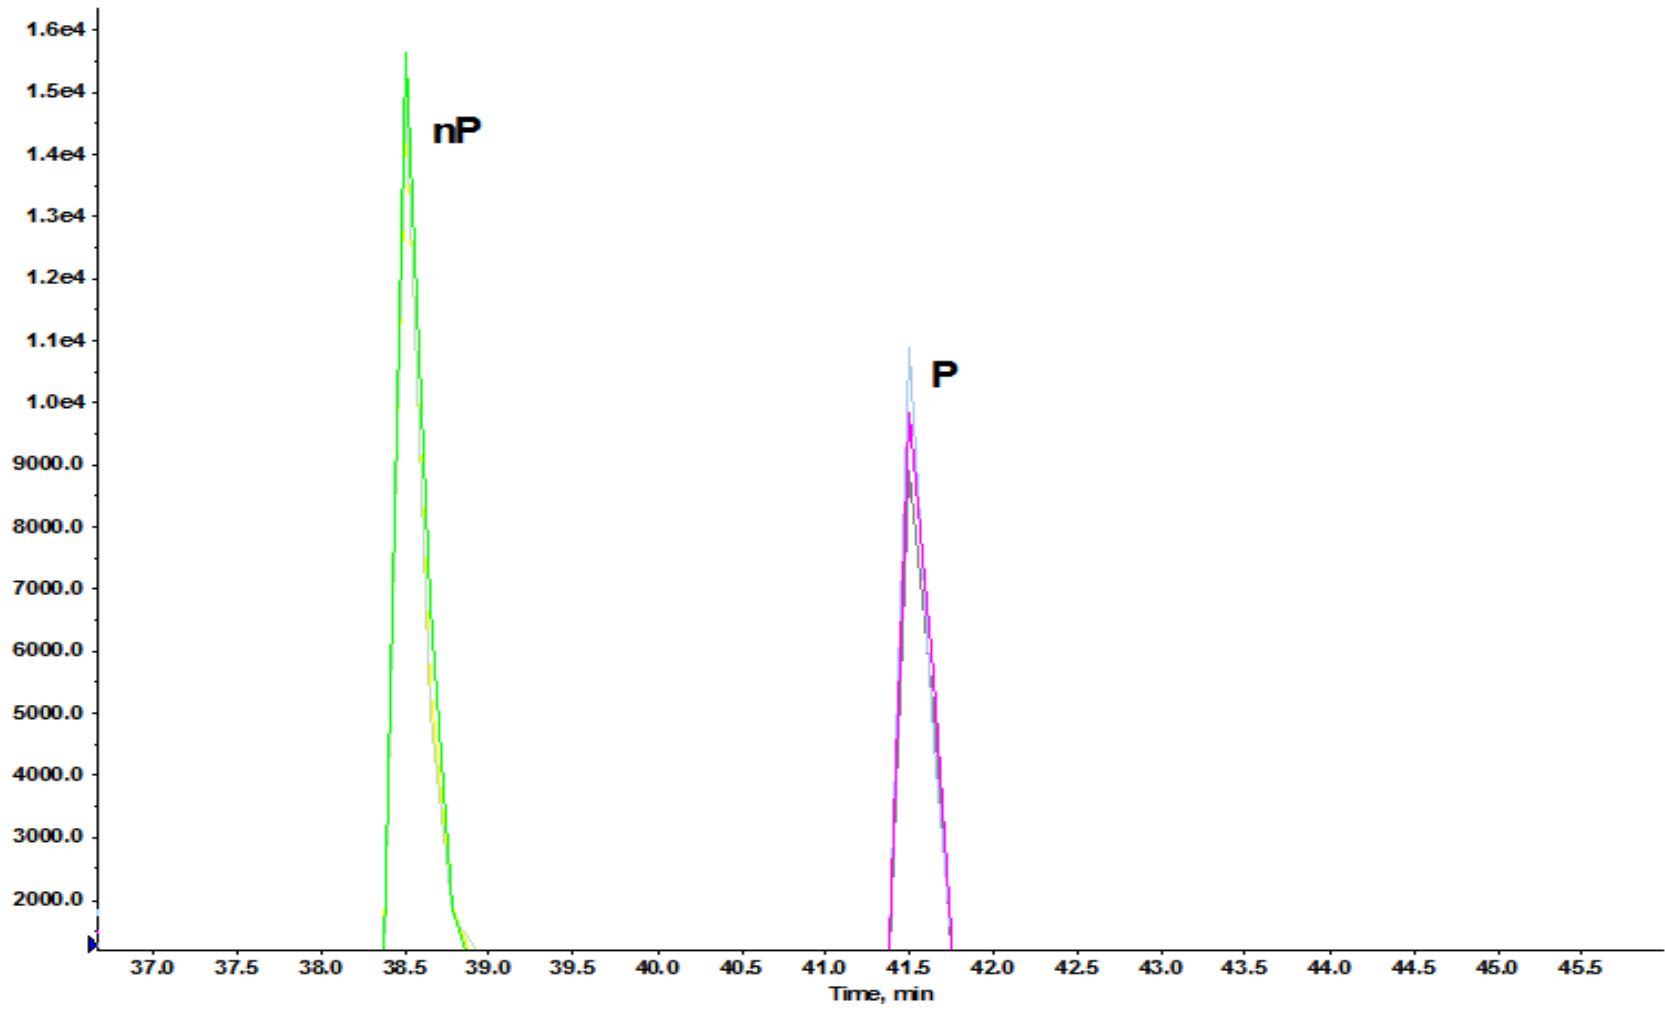

AEPKPS PQEAAK  
AEPKPS[Pho]PQEAAK

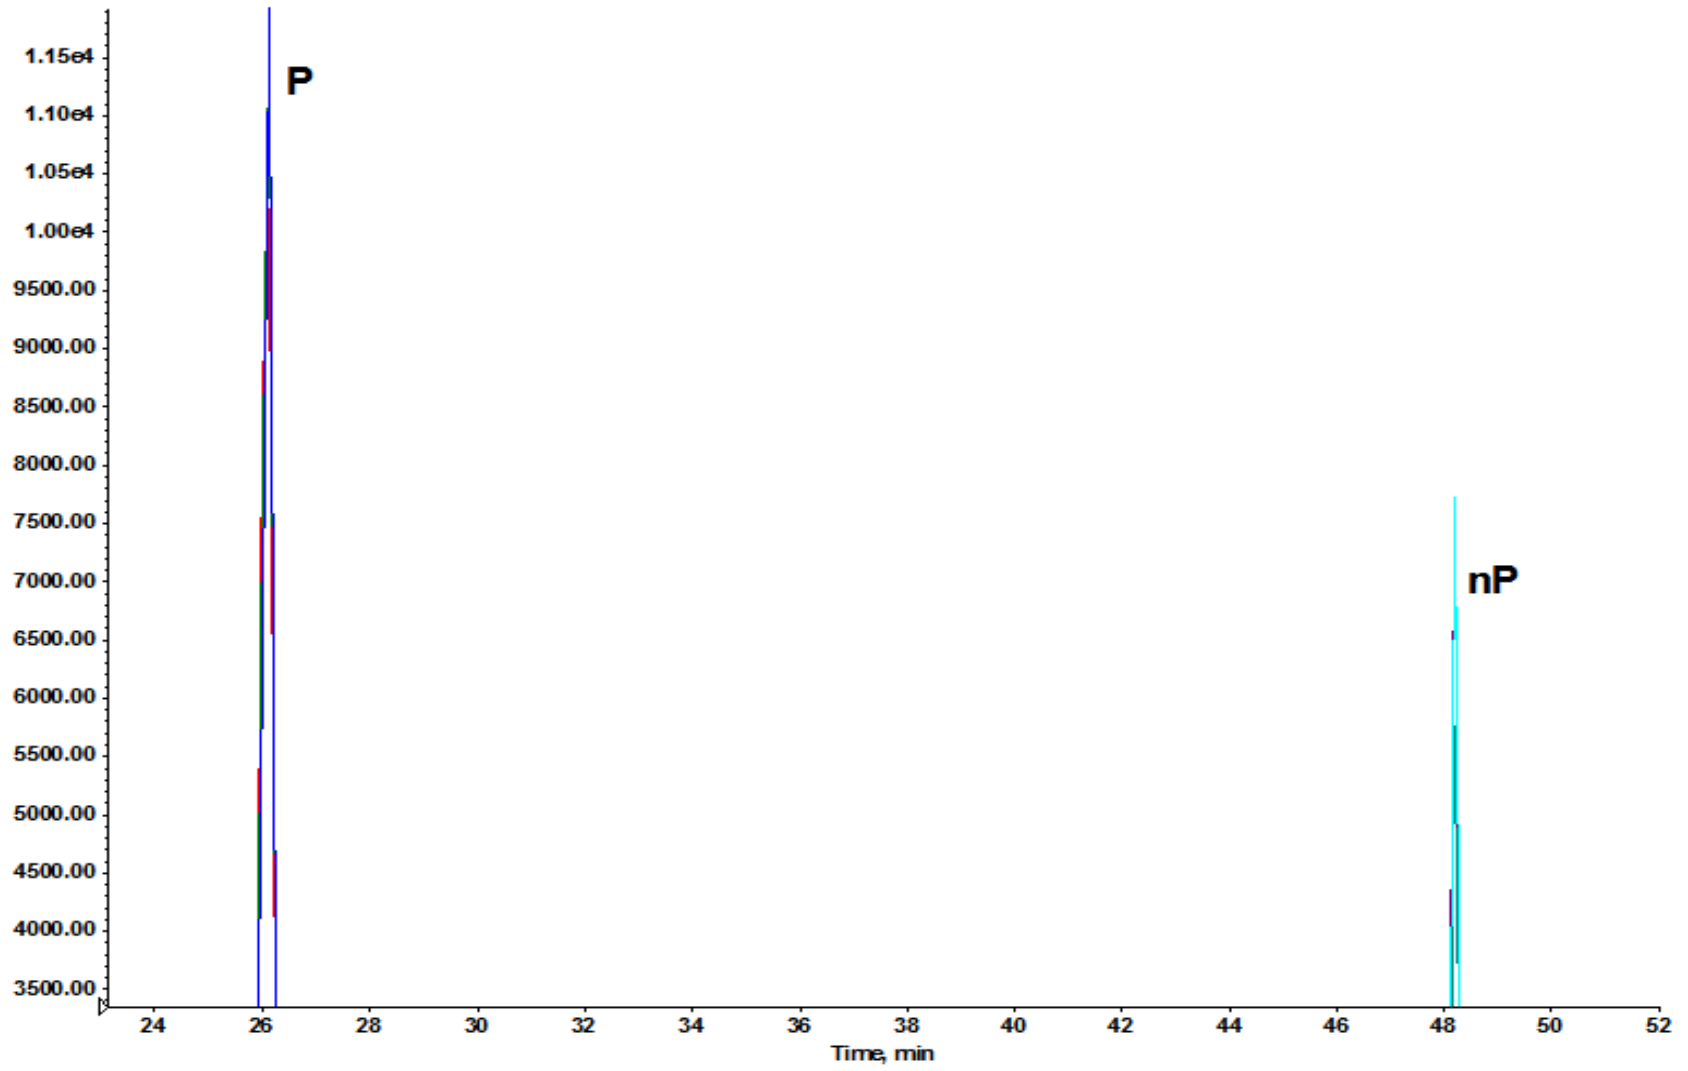

Name: SACE\_6838

EGGRTVGAGR

EGGRT[Pho]VGAGR

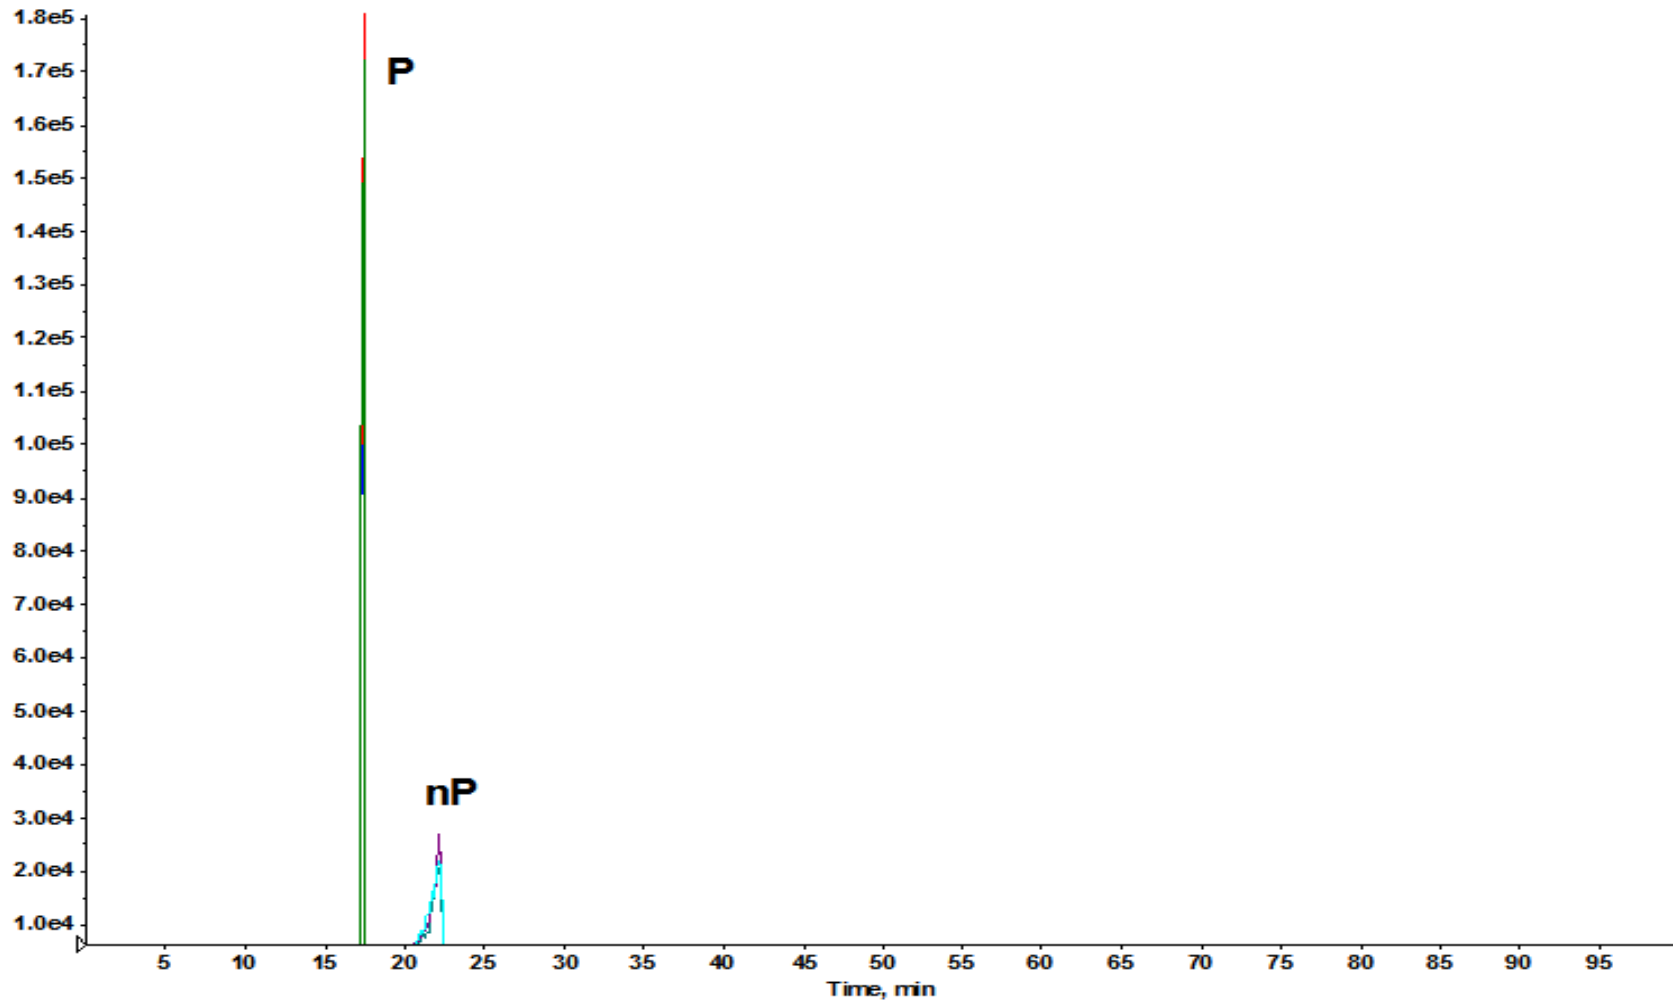

HYAHVDAPGHADYVK  
HY[Pho]AHVDAPGHADYVK

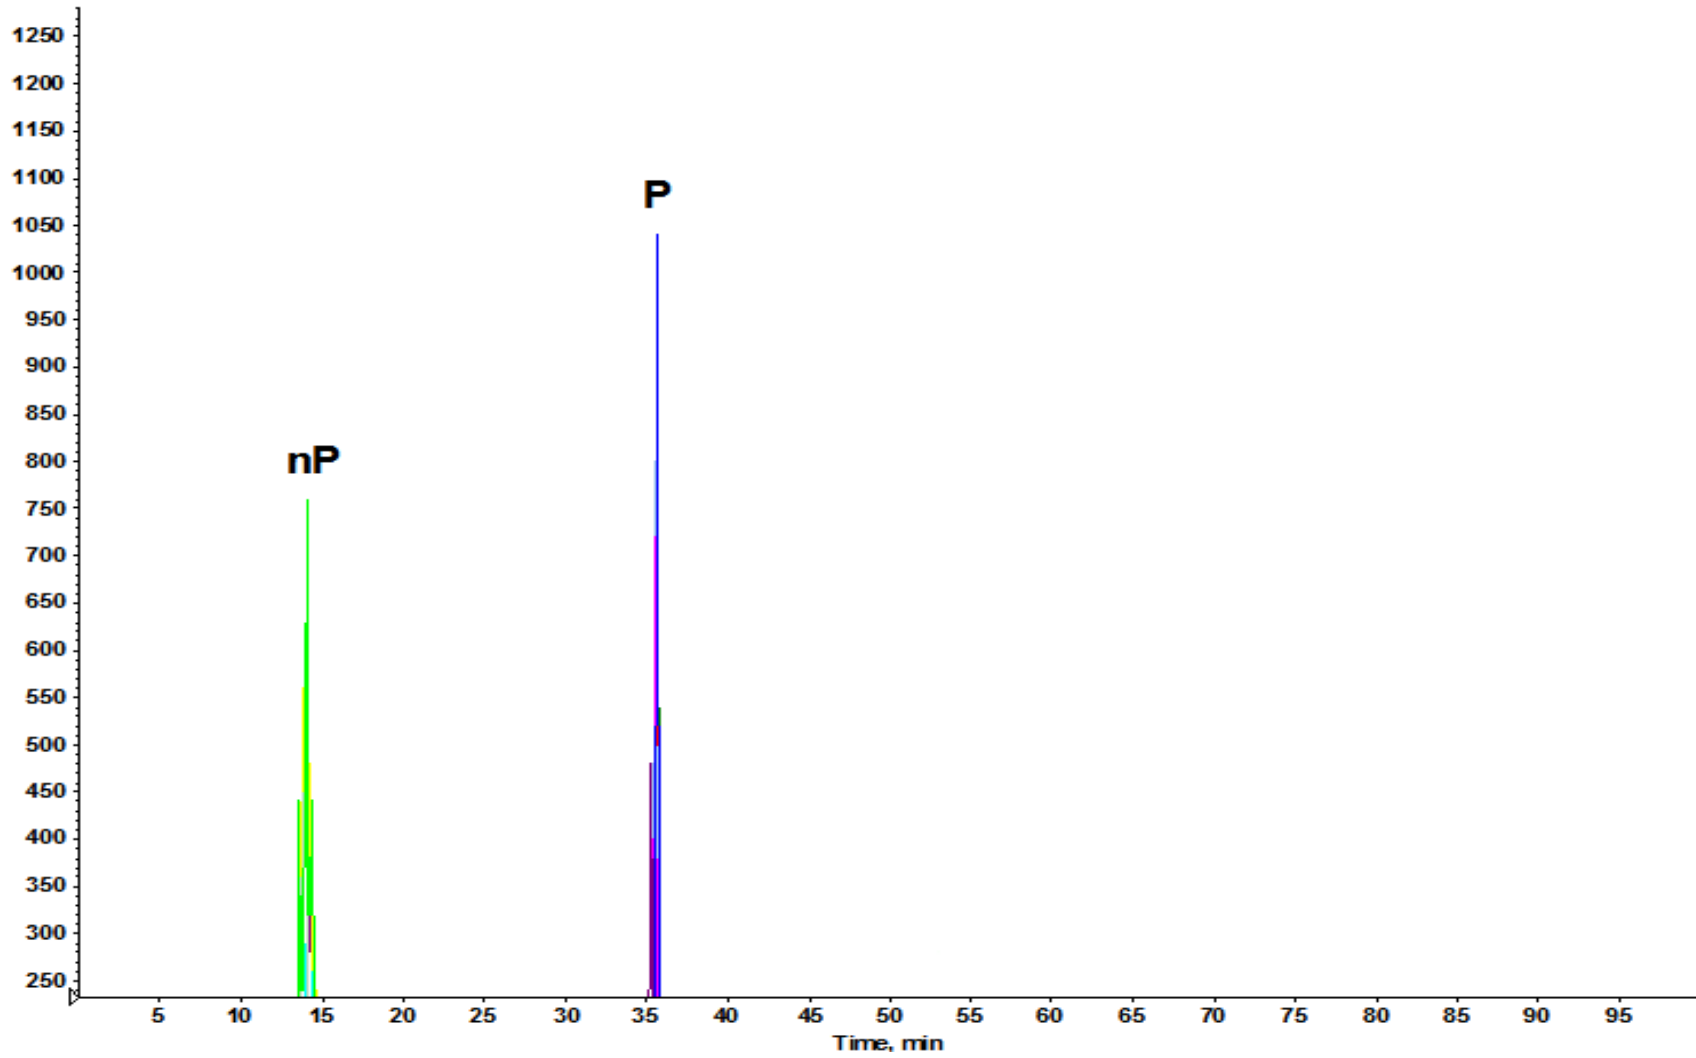

Name: SACE\_6282

RTGKVLSPVVGDDF

RTGKVLS[Pho]VPVGDDF

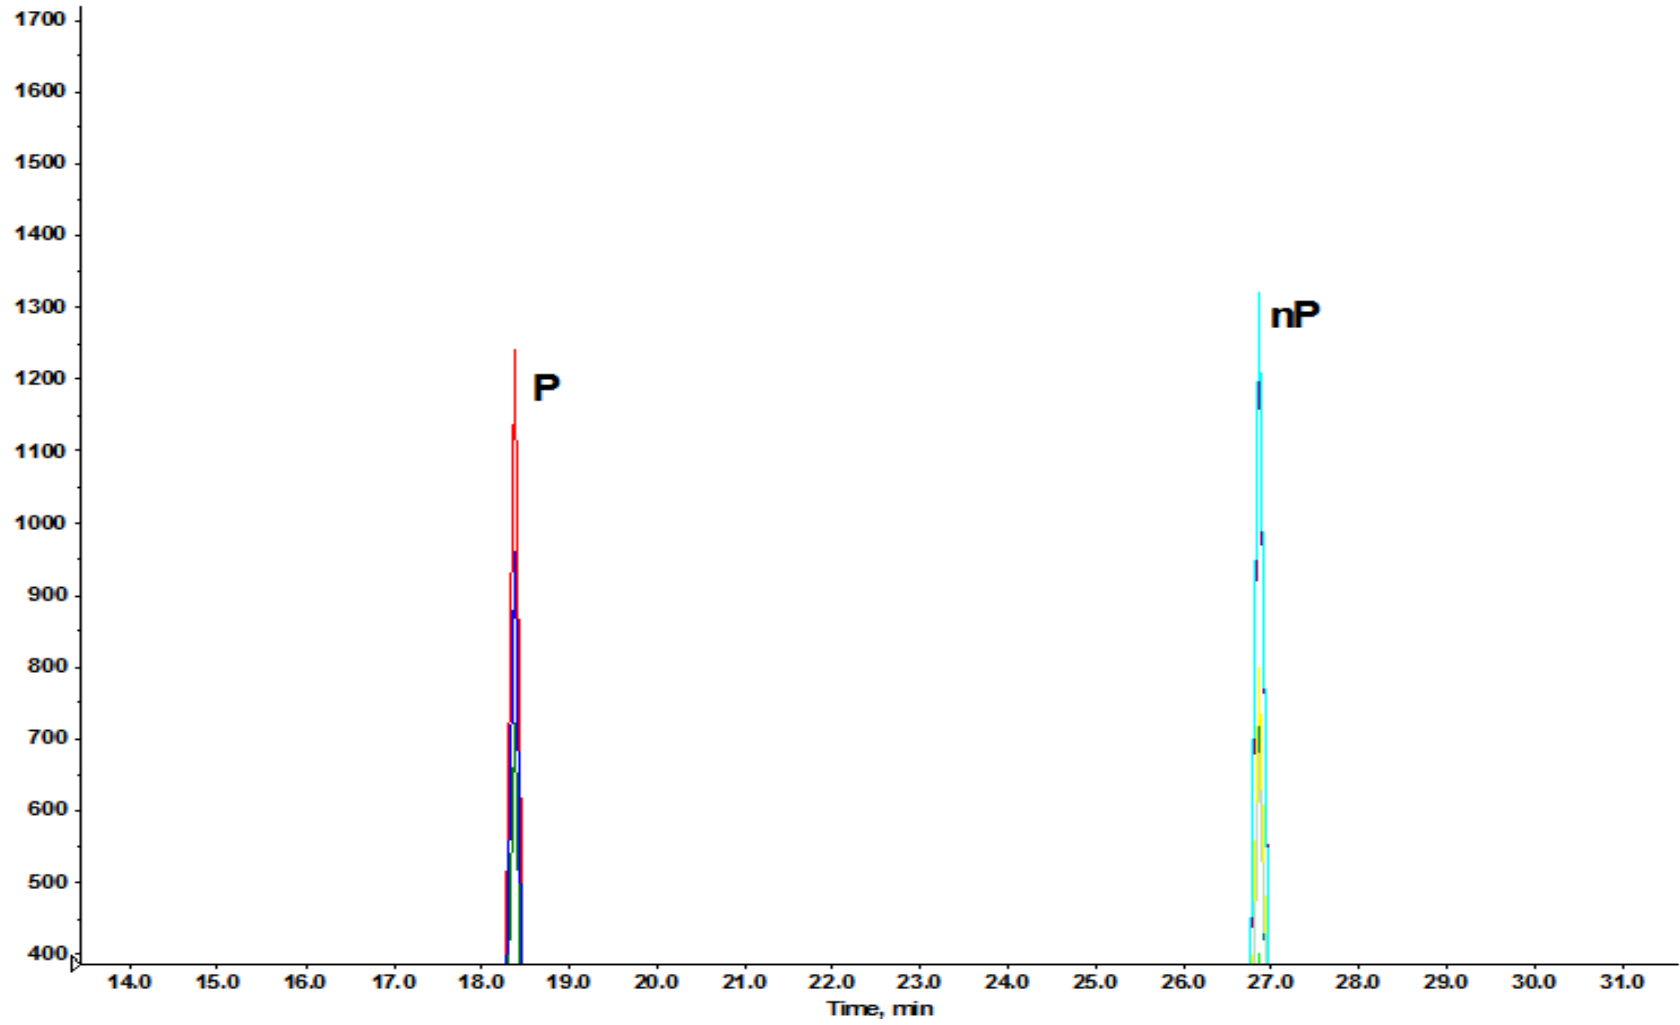

Name: SACE\_2177

SDVDGVITER  
SDVDGVIT[Pho]ER

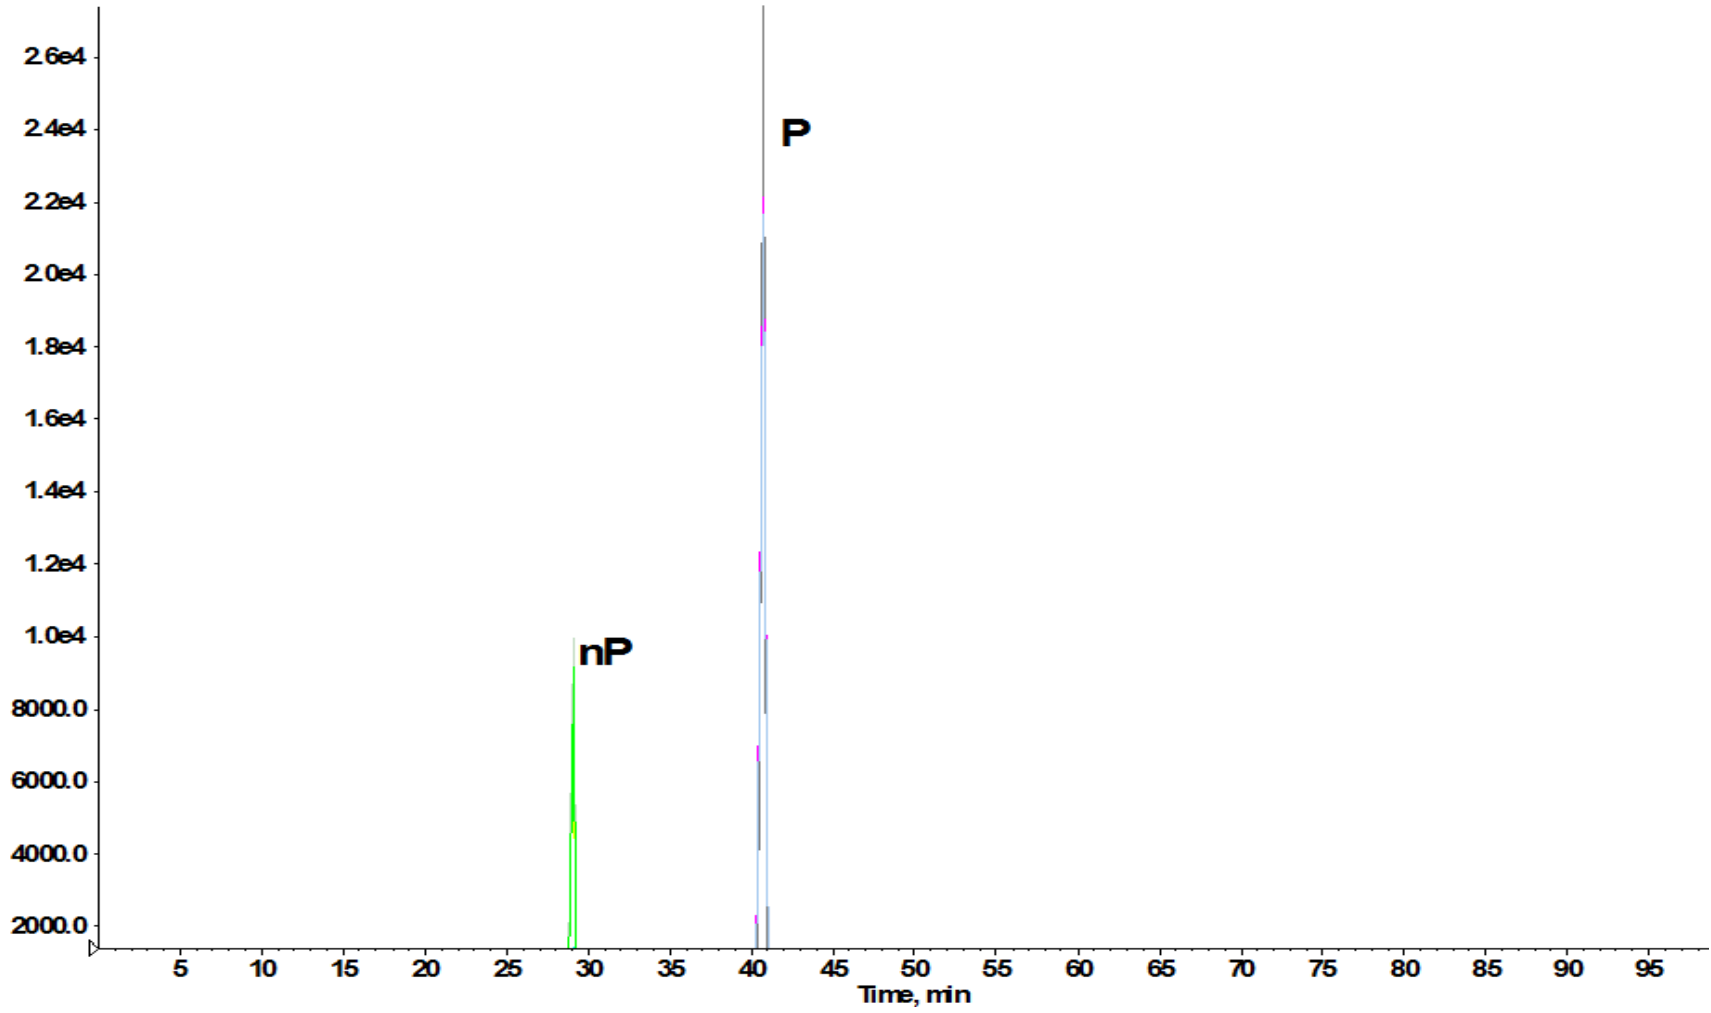

FITGGSMIEMVHIDR  
FITGG[Pho]MIEMVHIDR

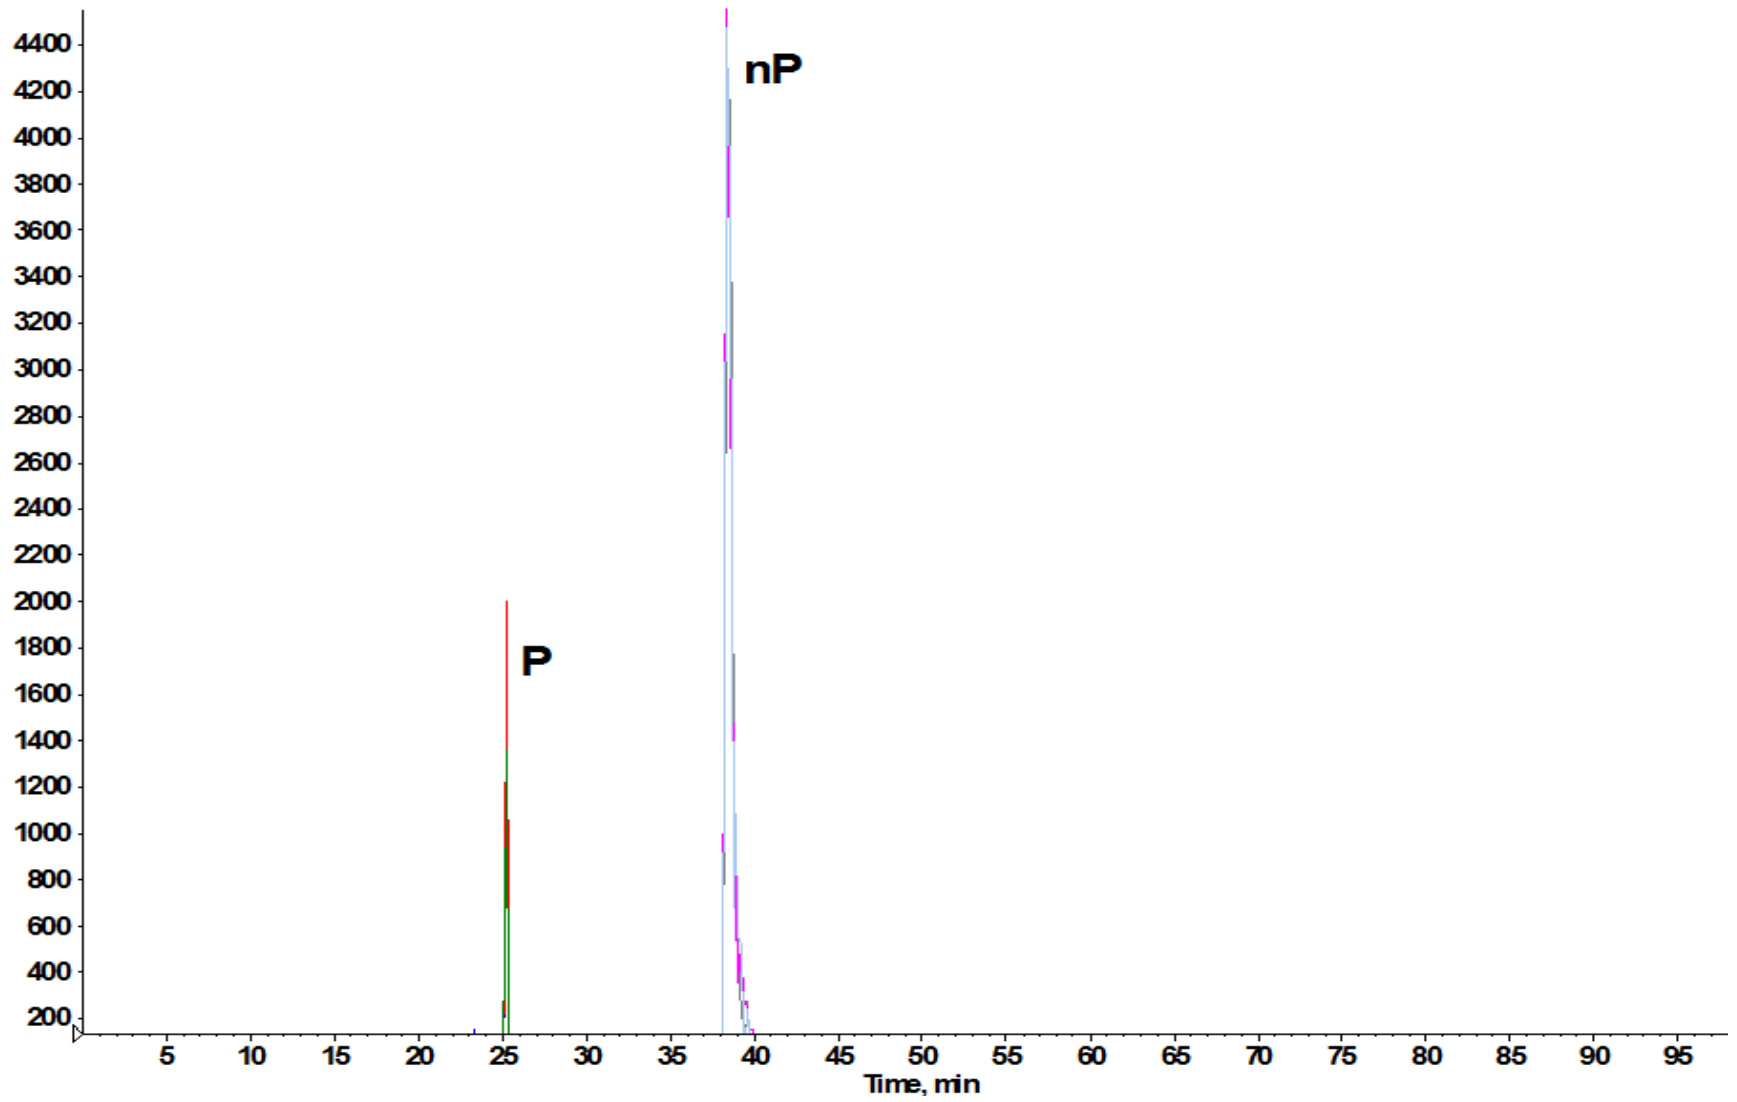

Name: SACE\_1473

GLQTPDLSLLVDGLR

GLQT[Pho]PDLS[Pho]LLVDGLR

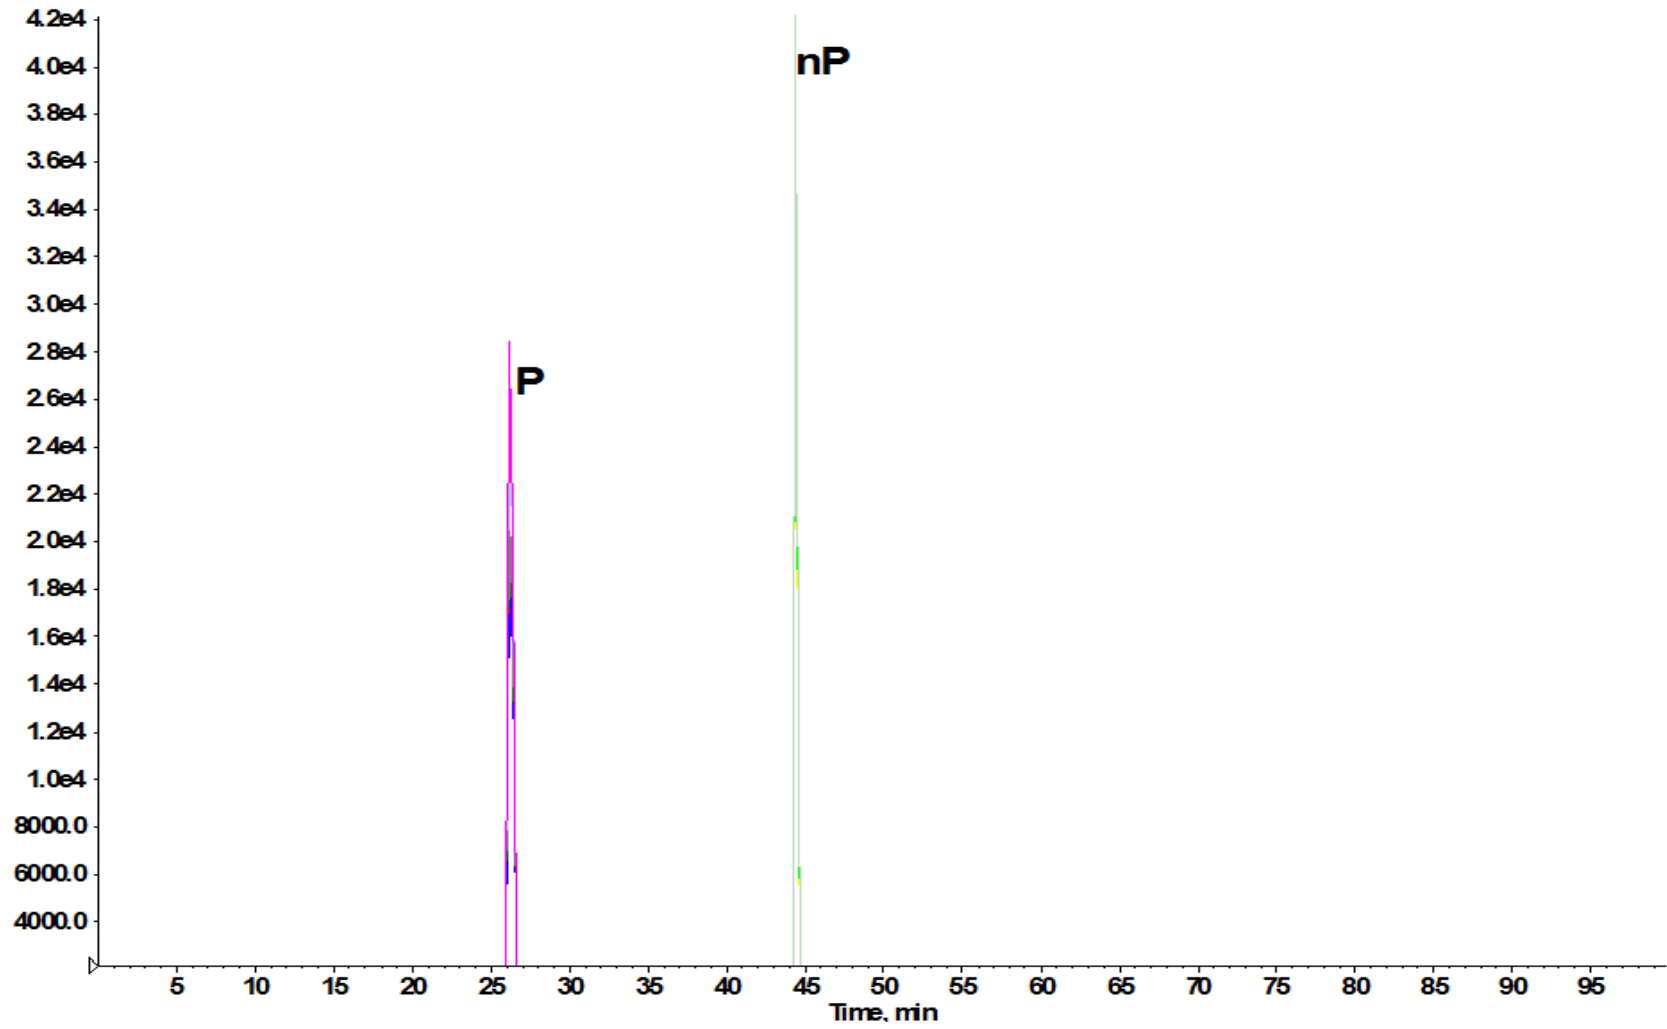



Name: SACE\_3842

ELSDKDVALDR

ELS[Pho]DKDVALDR

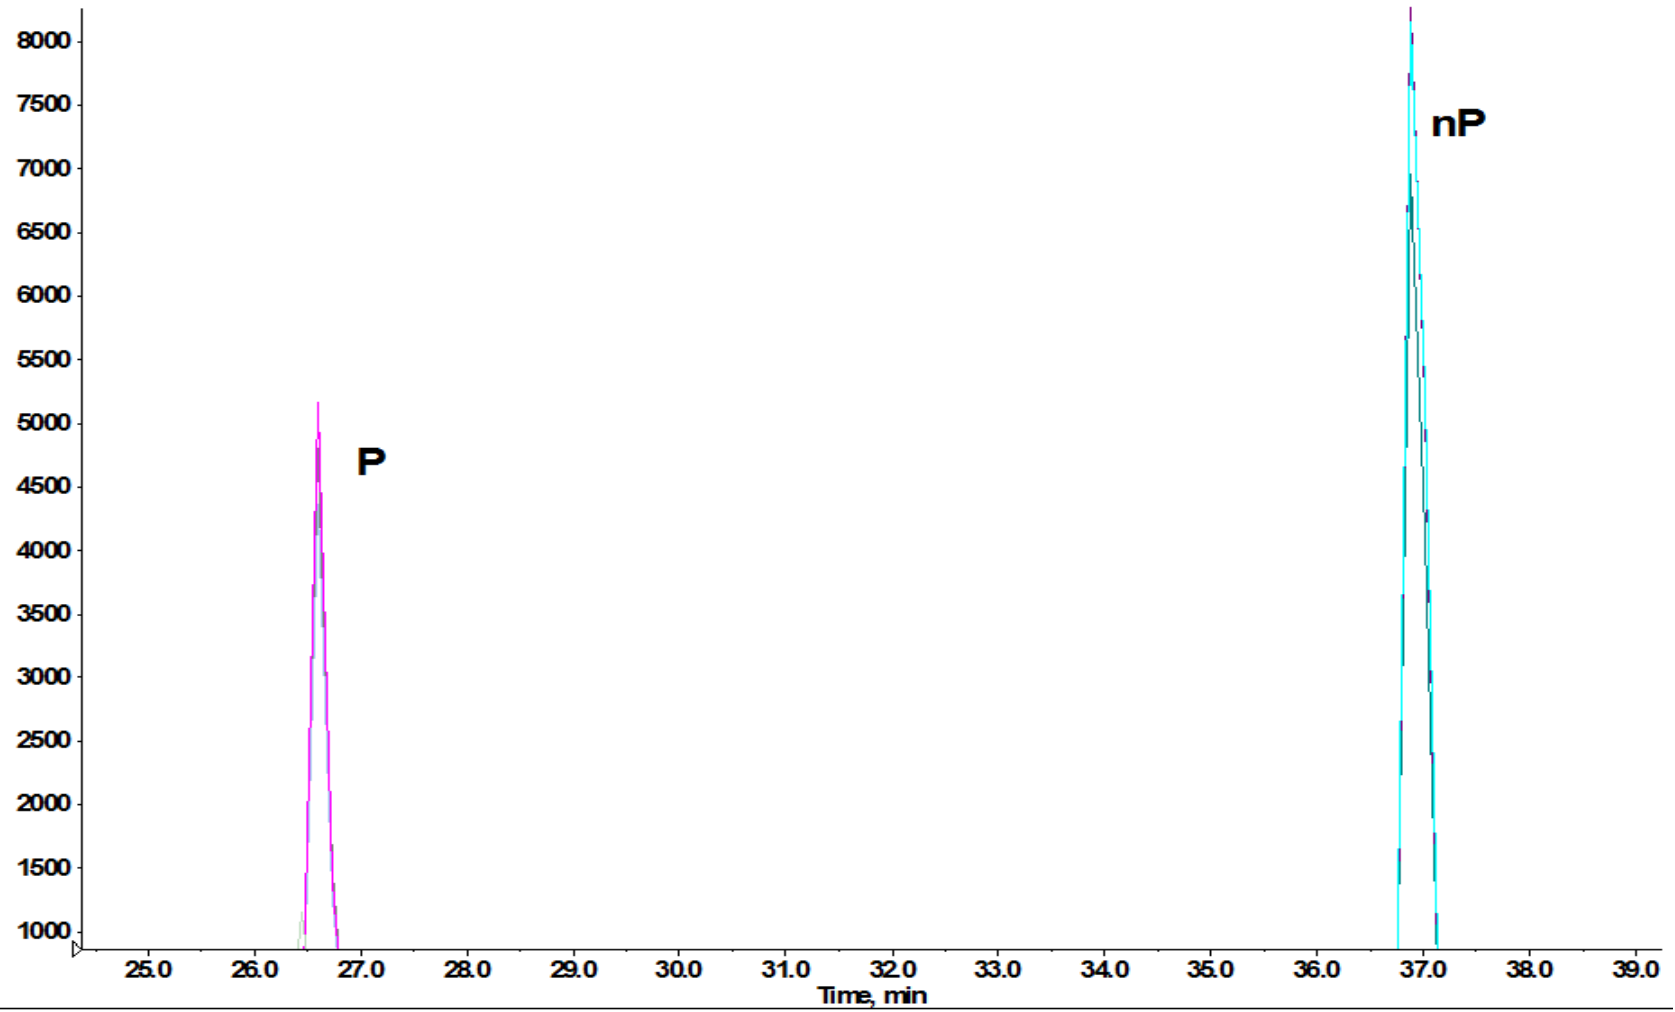

Name: SACE\_0302

FSSVAGELGSPDTWR

FSS[Pho]VAGELGS[Pho]PDTWR

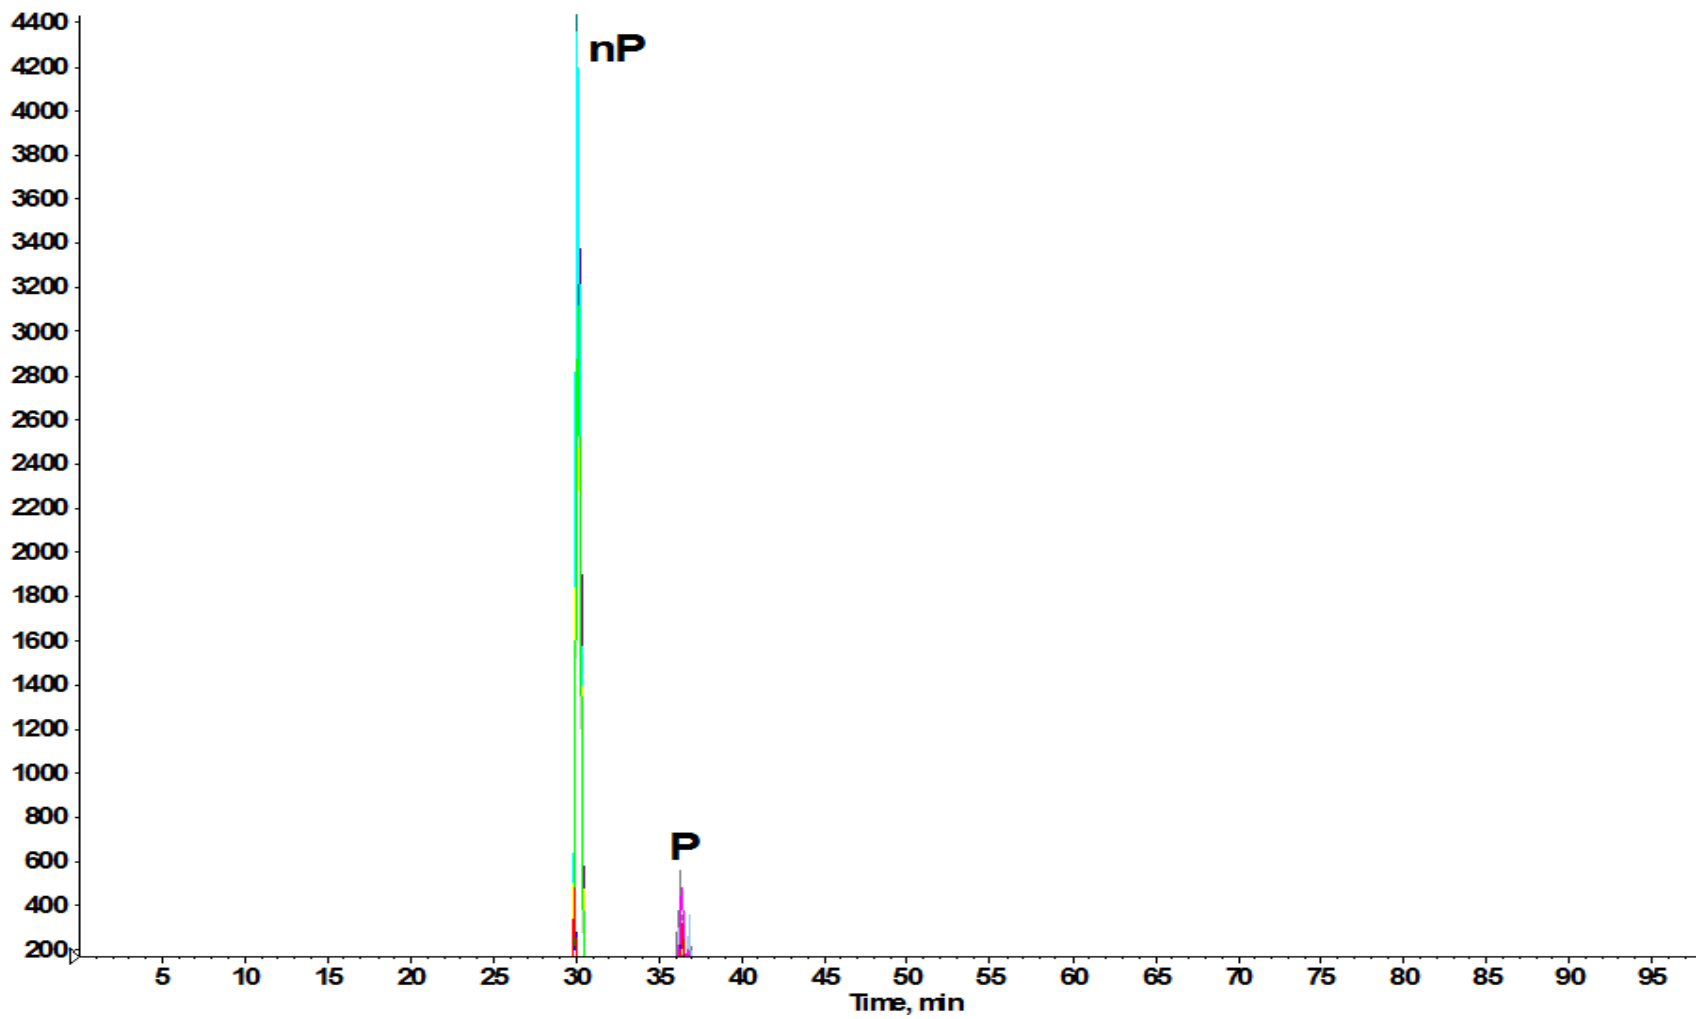

Name: SACE\_2103

NAVAAGLASRIEVQVAYAIGAAAP  
NAVAAGLAS[Pho]RIEVQVAYAIGAAAP

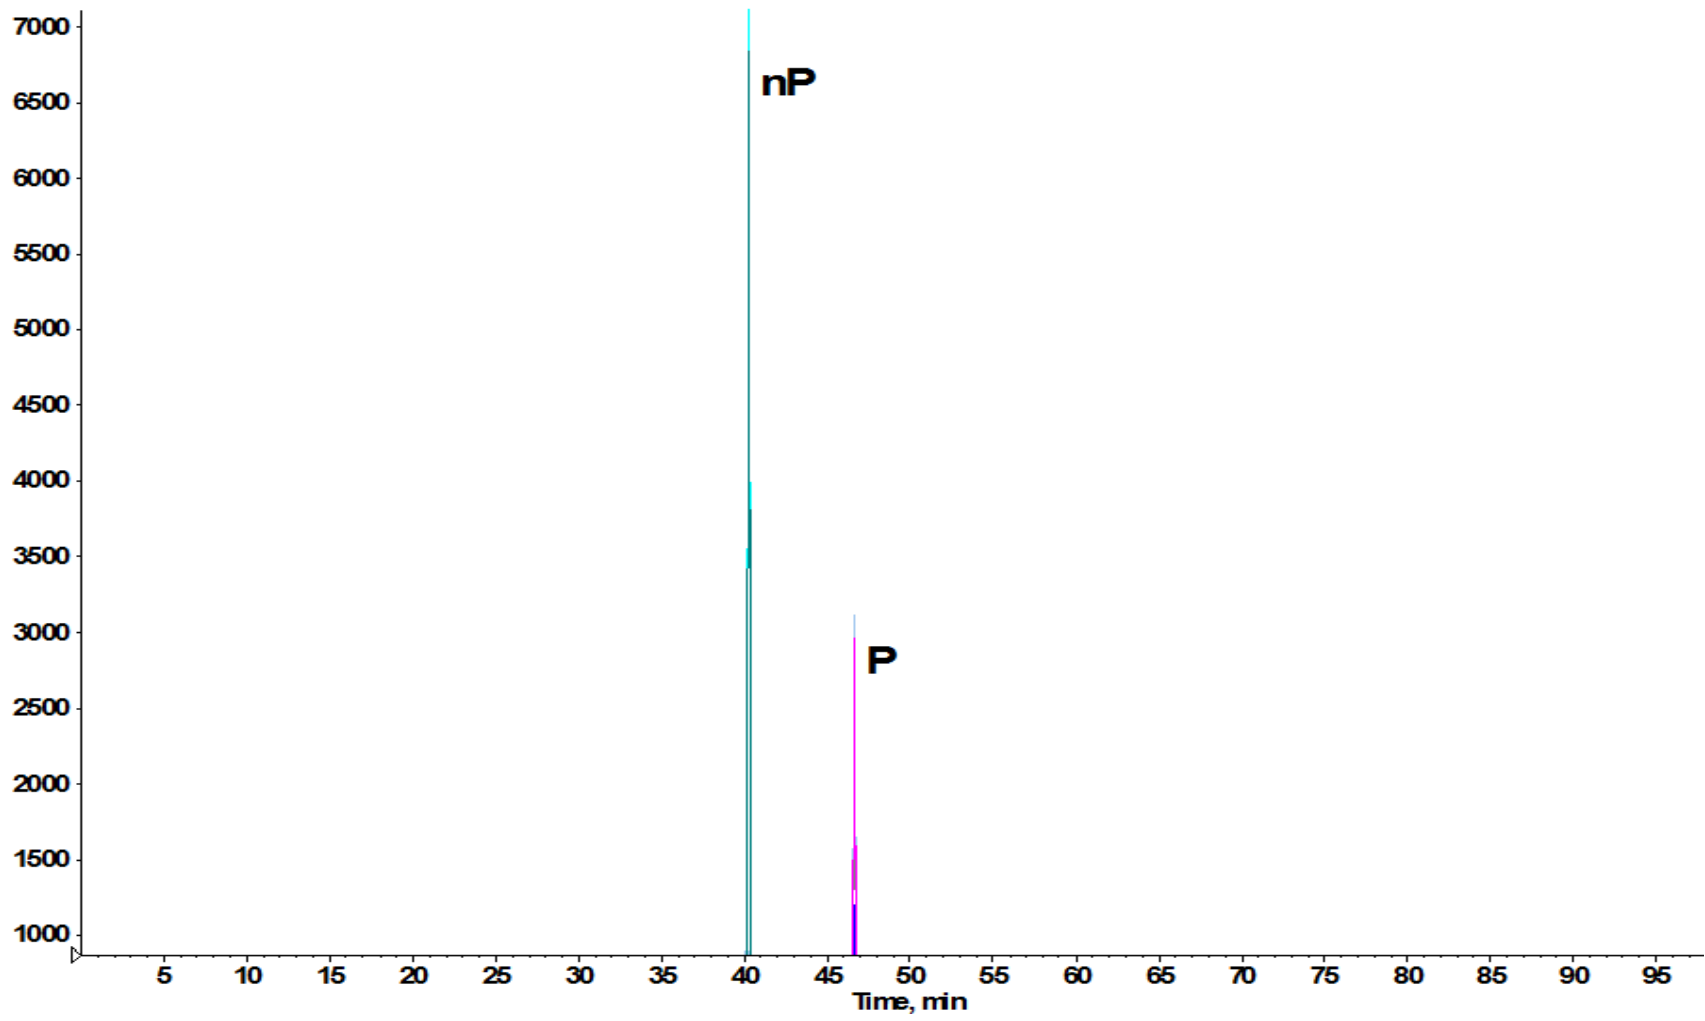

Name: SACE\_0033

ATGMSRKQLAK  
AT[Pho]GMSRKQLAK

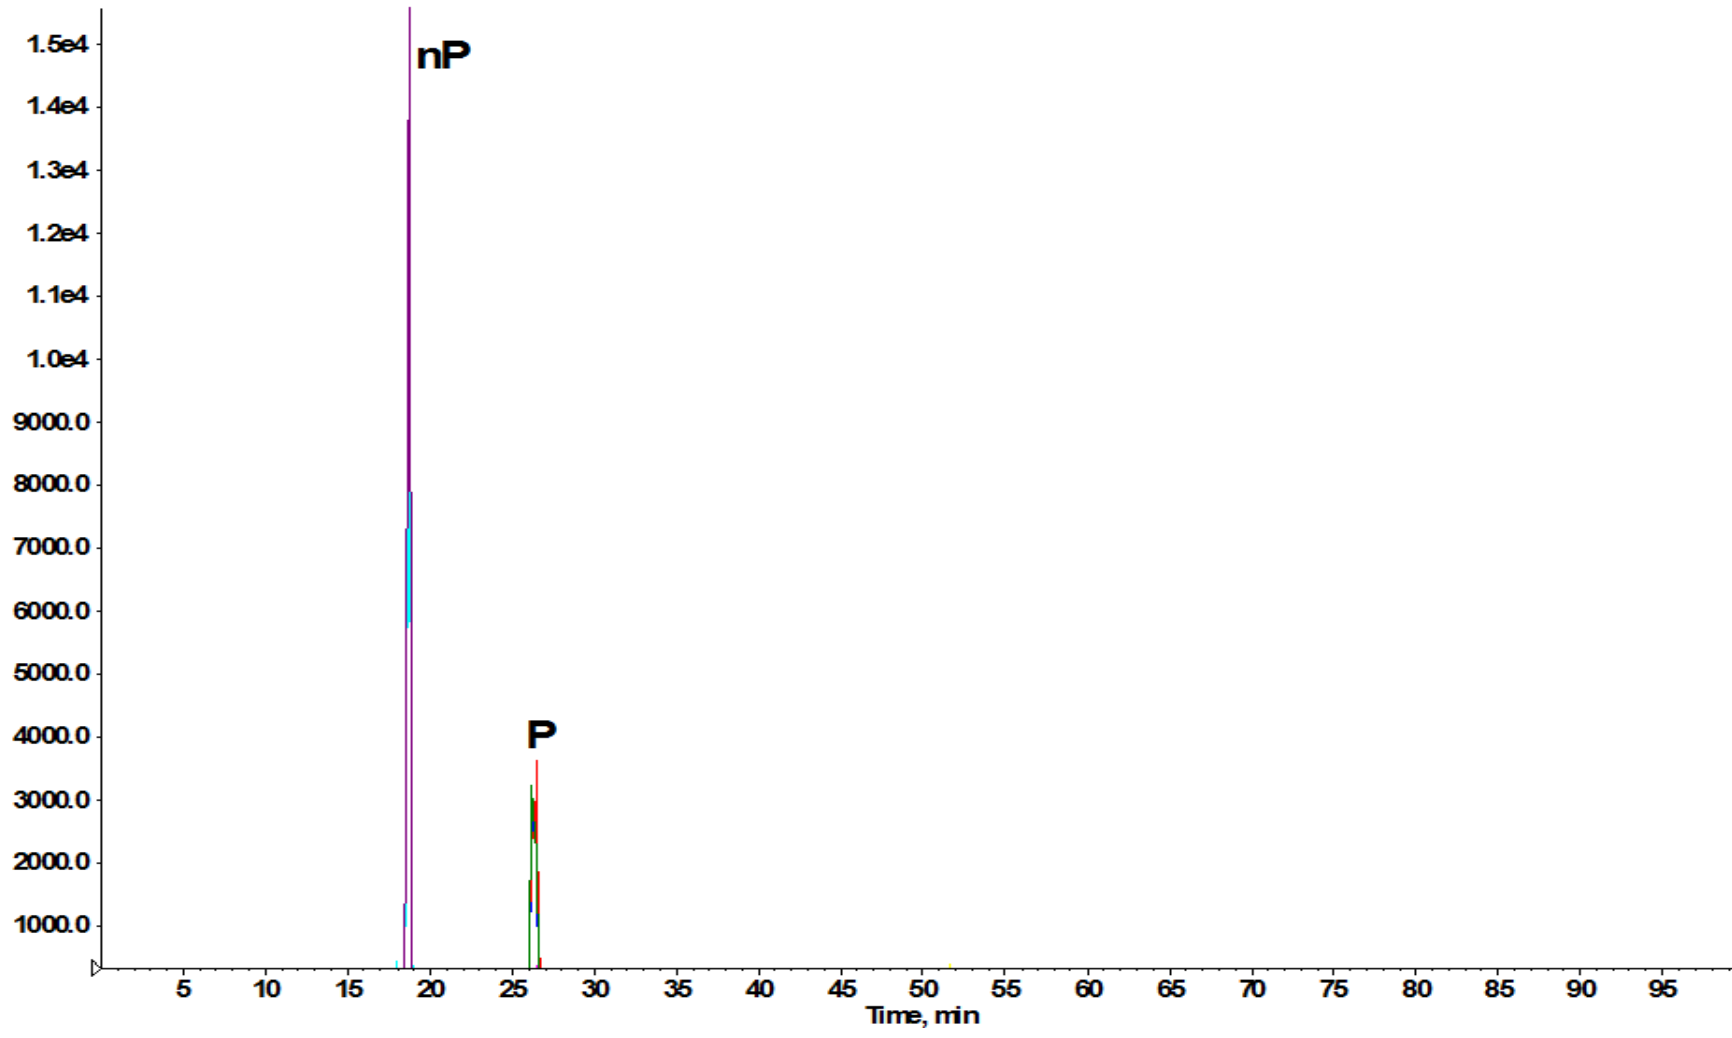

Name: SACE\_0453

PRTCTALVGVTAAL

PRTCT[Pho]ALVGVTAAL

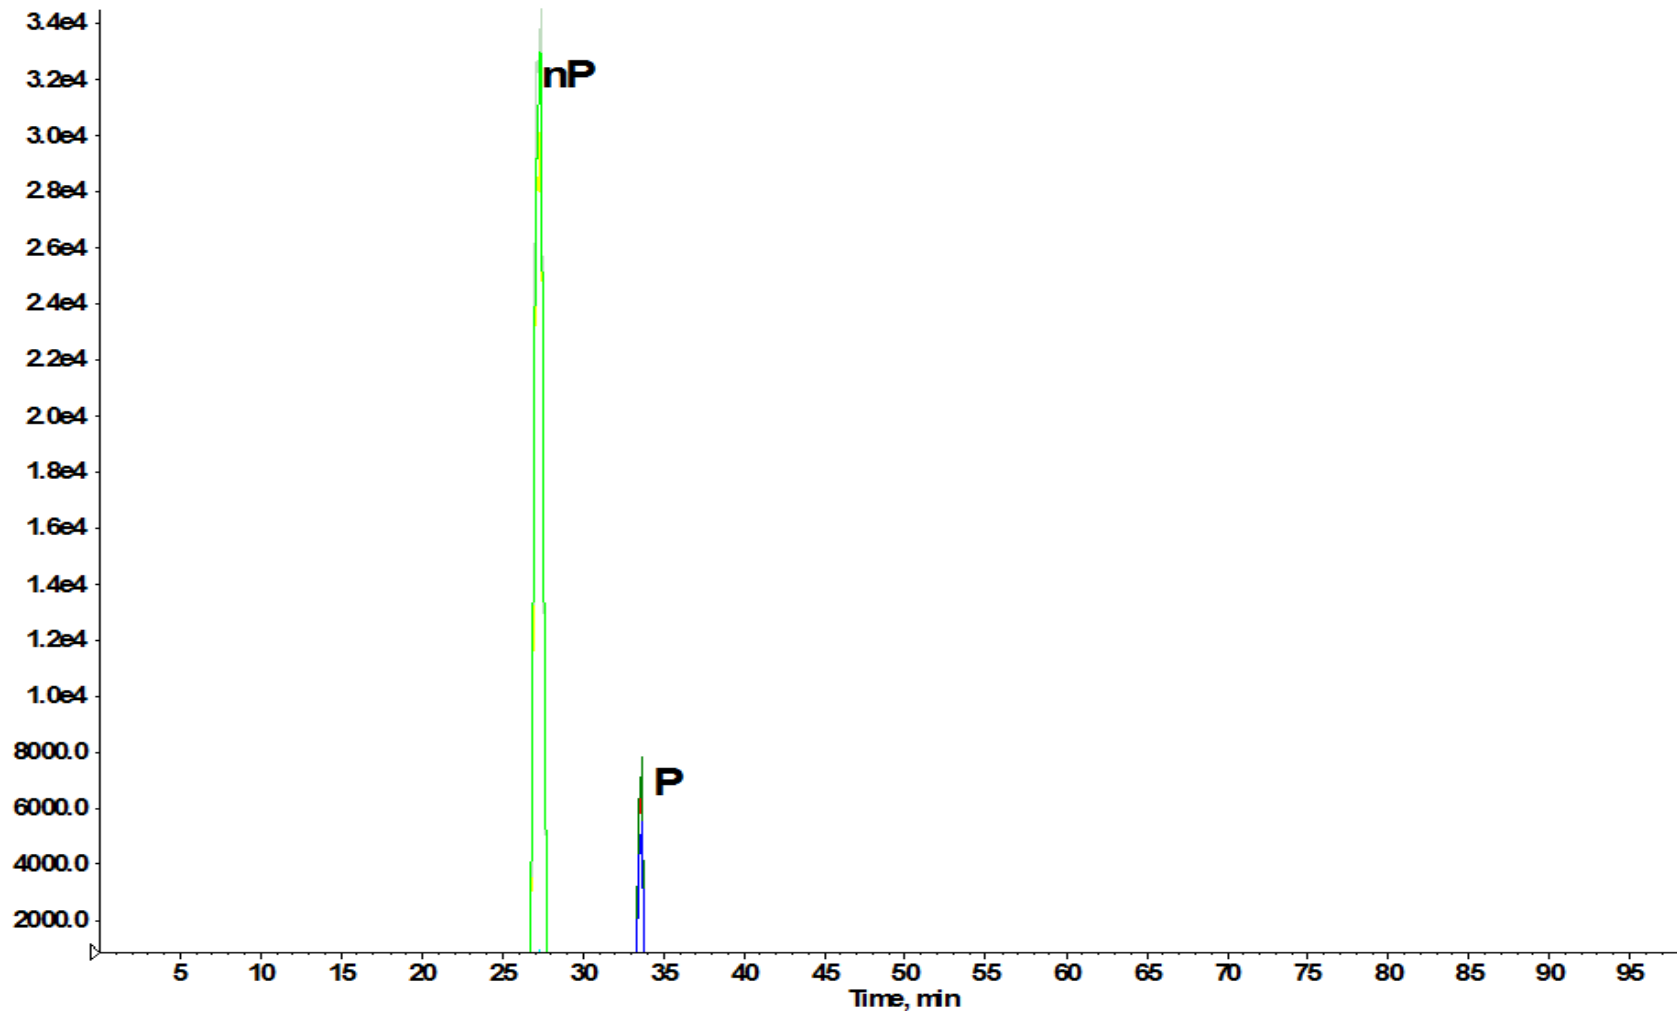

Name: SACE\_2279

AAVEAVRPGVTAESIDAAAR  
AAVEAVRPGVT[Pho]AESIDAAAR

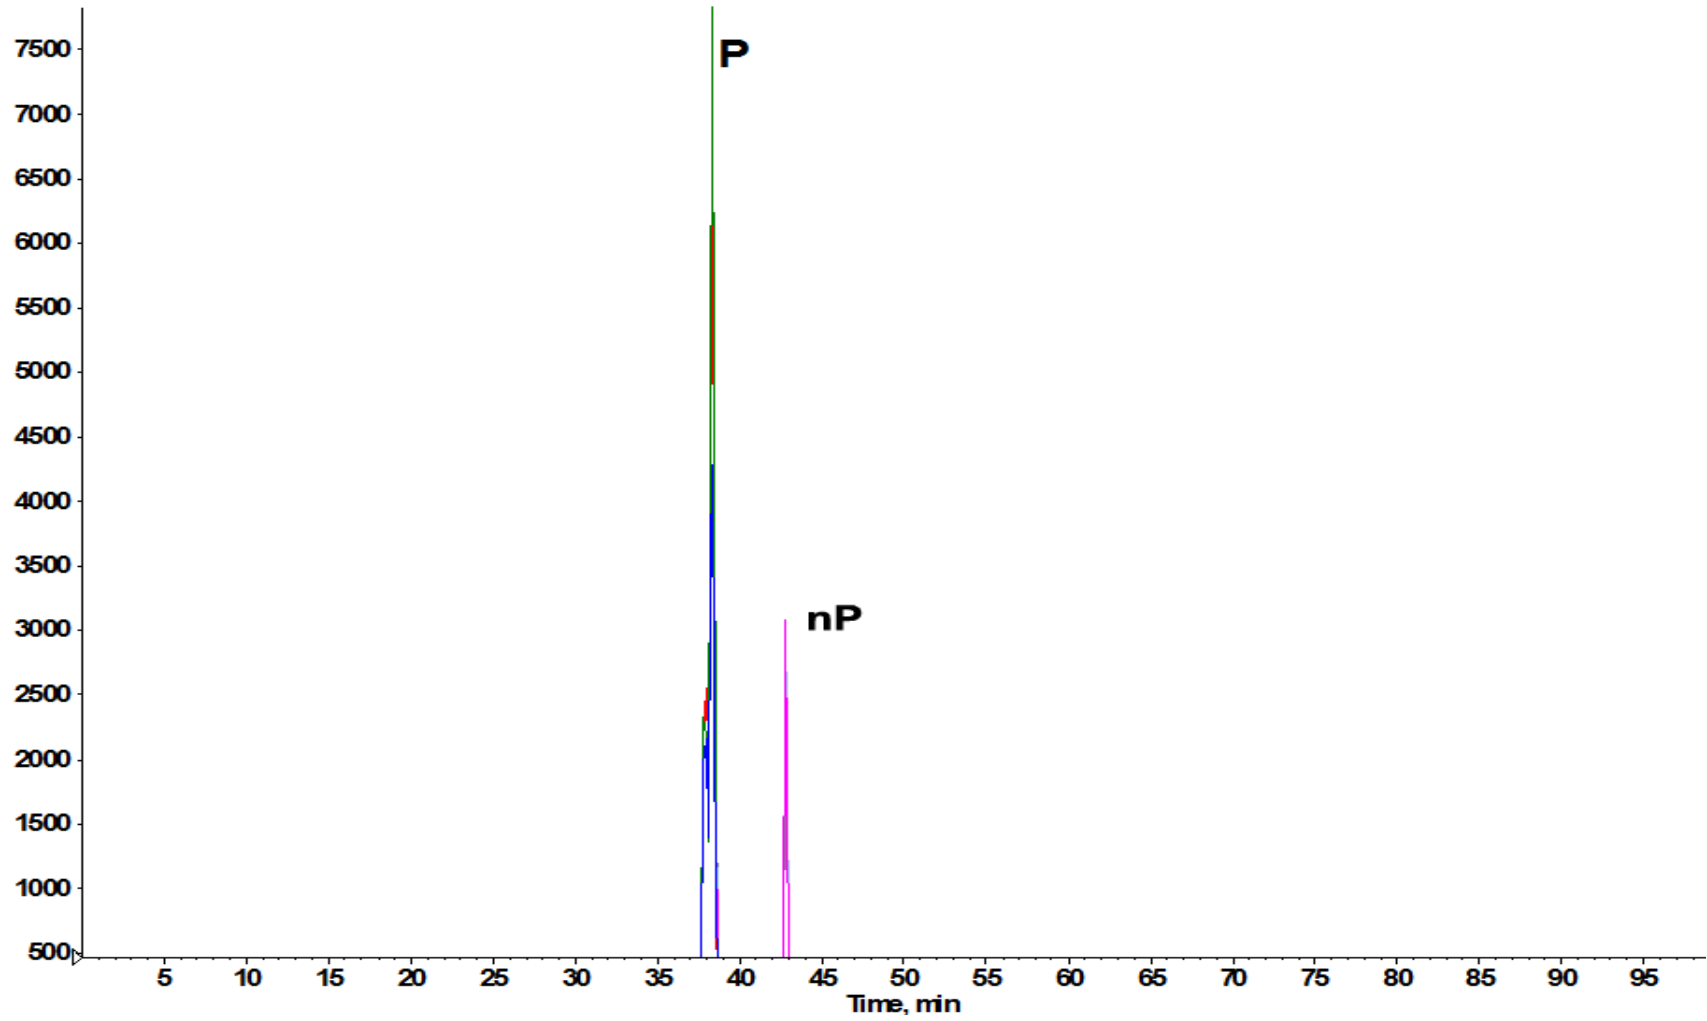

Name: SACE\_2671

TLLDSVPR  
TLLDS[Pho]VPR

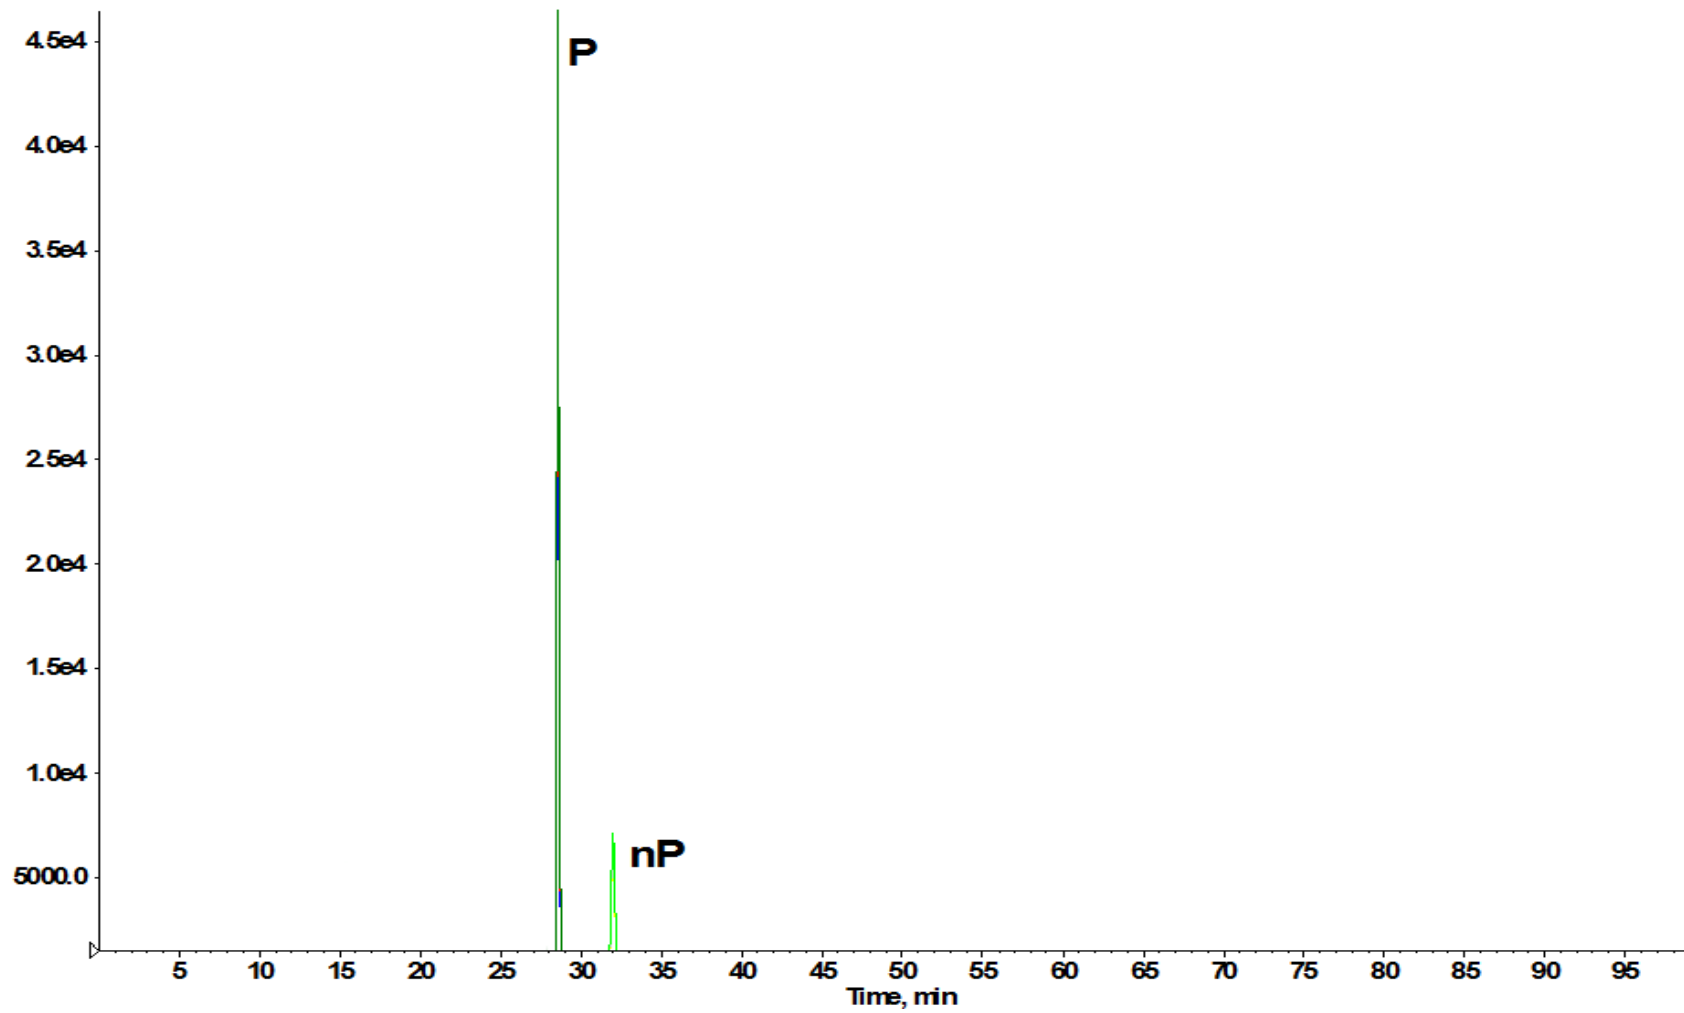

Name: SACE\_2969

RLPLDTLK  
RLPLDT[Pho]LK

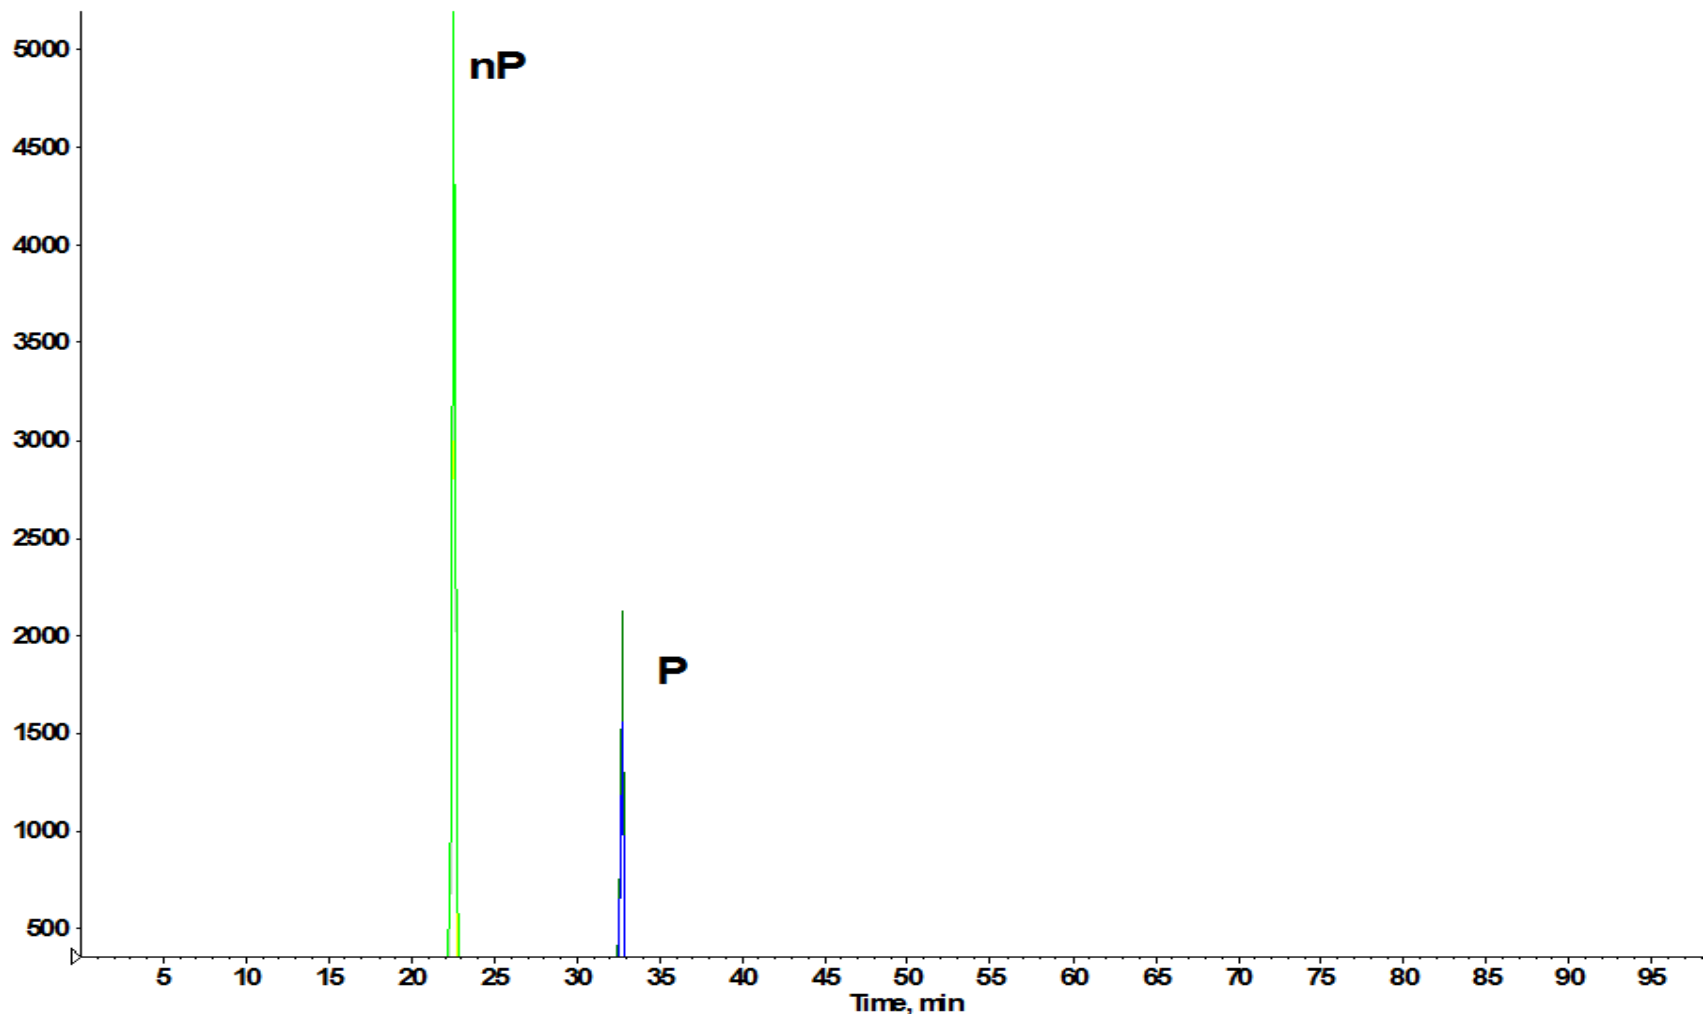



Name: SACE\_3064

LVAVLRTR

LVAVLRT[Pho]R

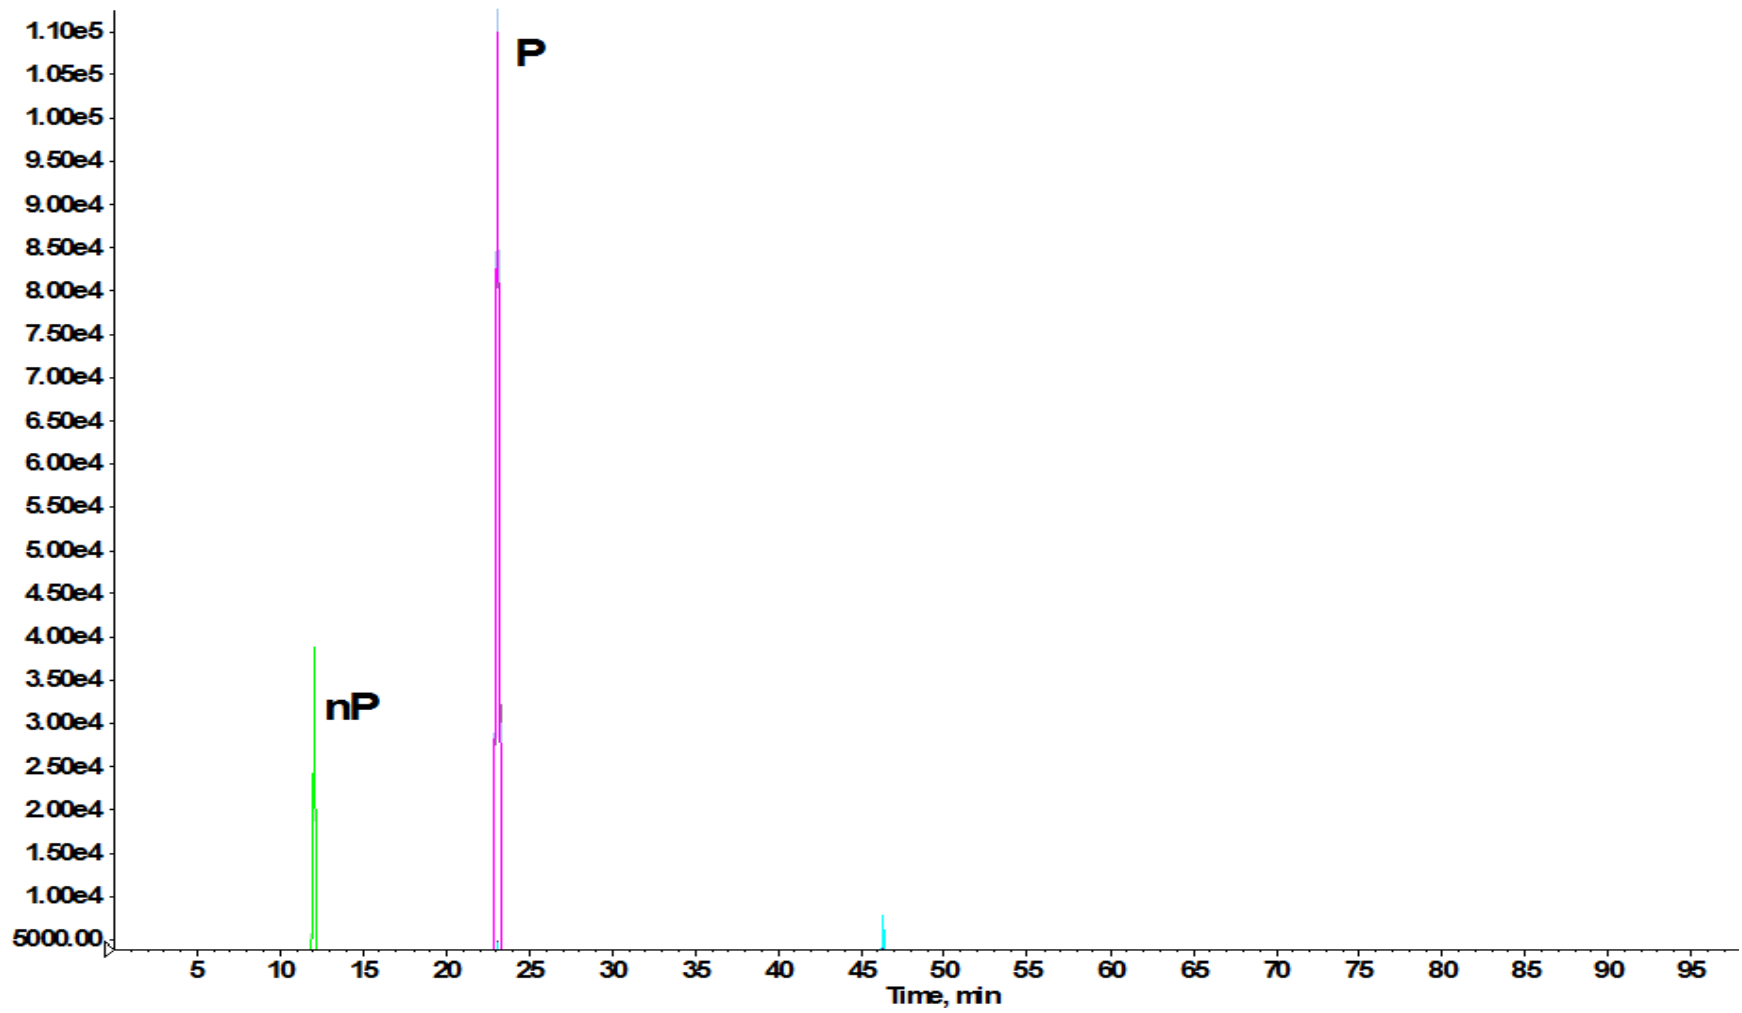

Name: SACE\_3282

EVGSVRLGGITRR

EVGSVRLGGIT[Pho]RR

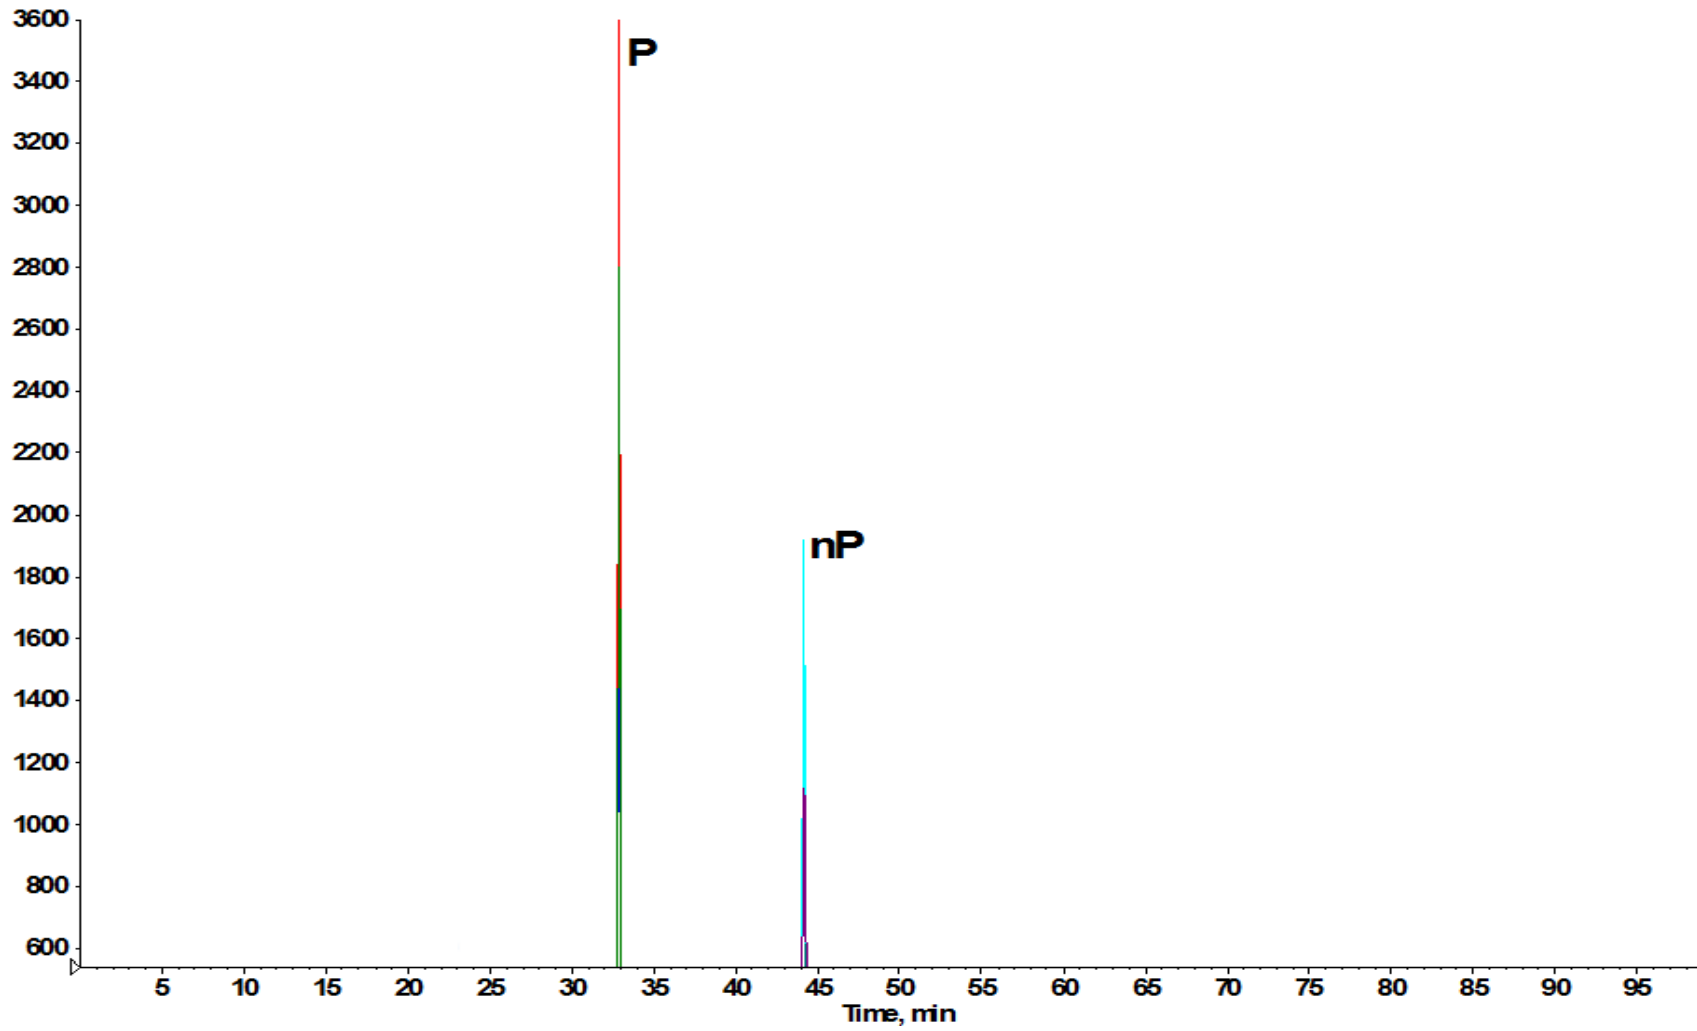

Name: SACE\_4061

VDRAGSAIEELLHAER

VDRAGS[Pho]AIEELLHAER

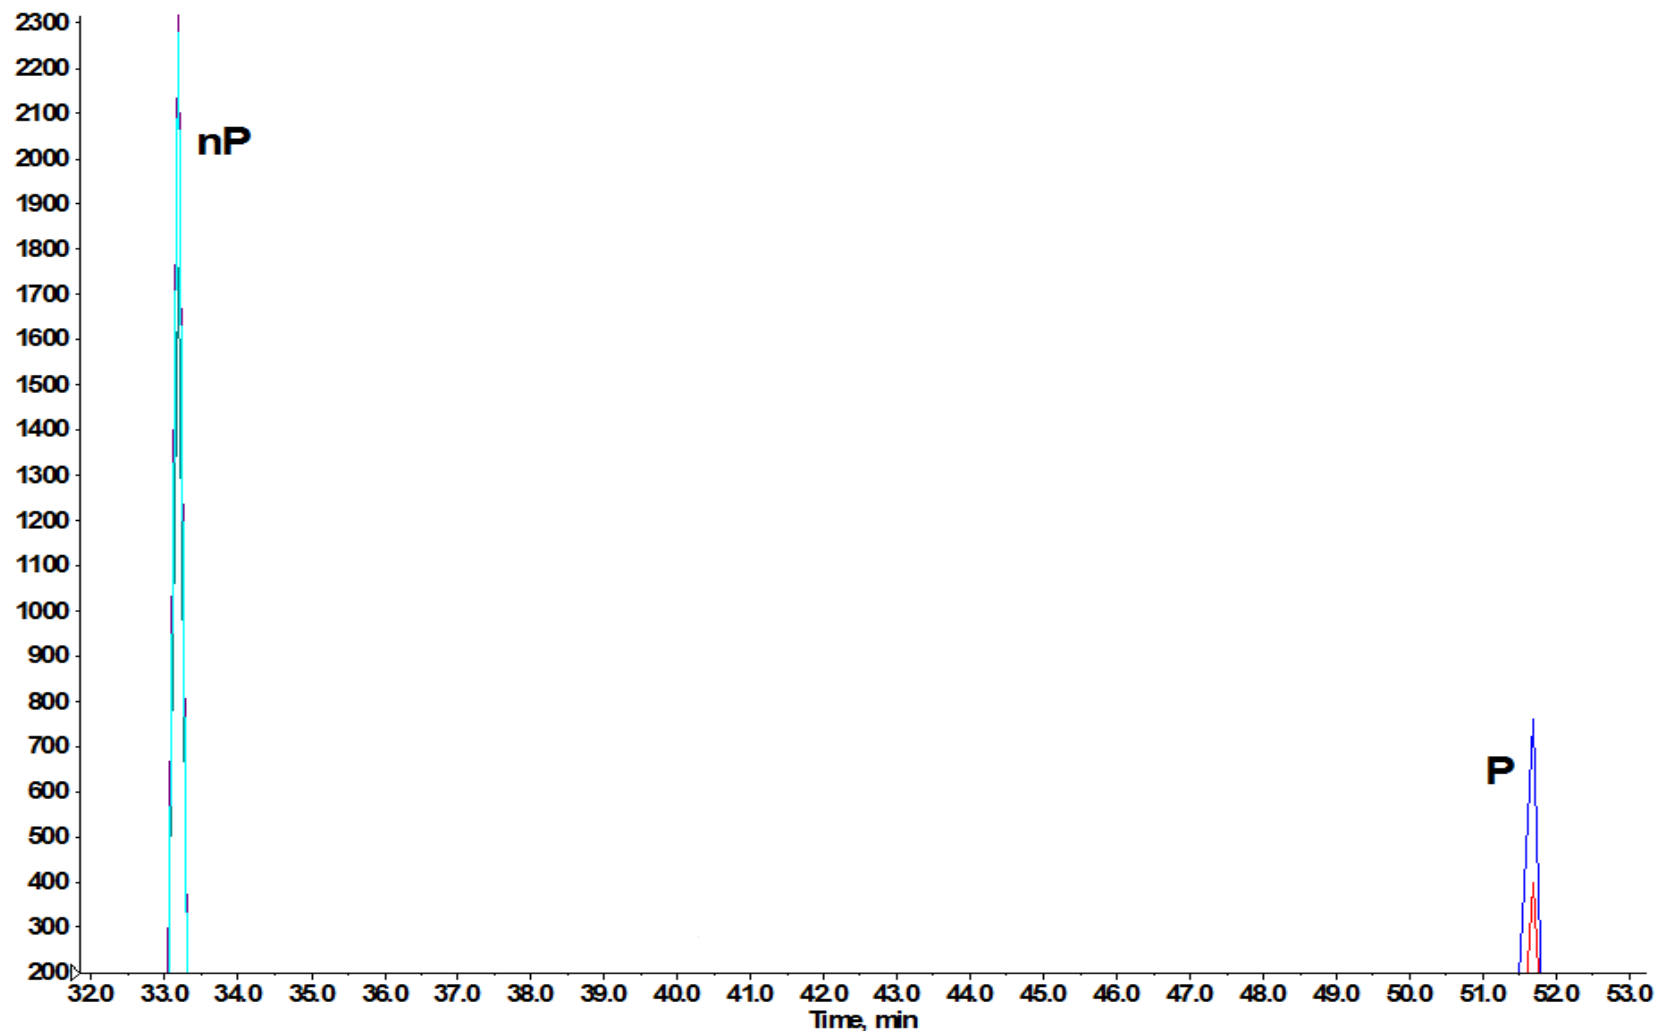

Name: SACE\_5439

TPAAEDPR

T[Pho]PAAEDPR

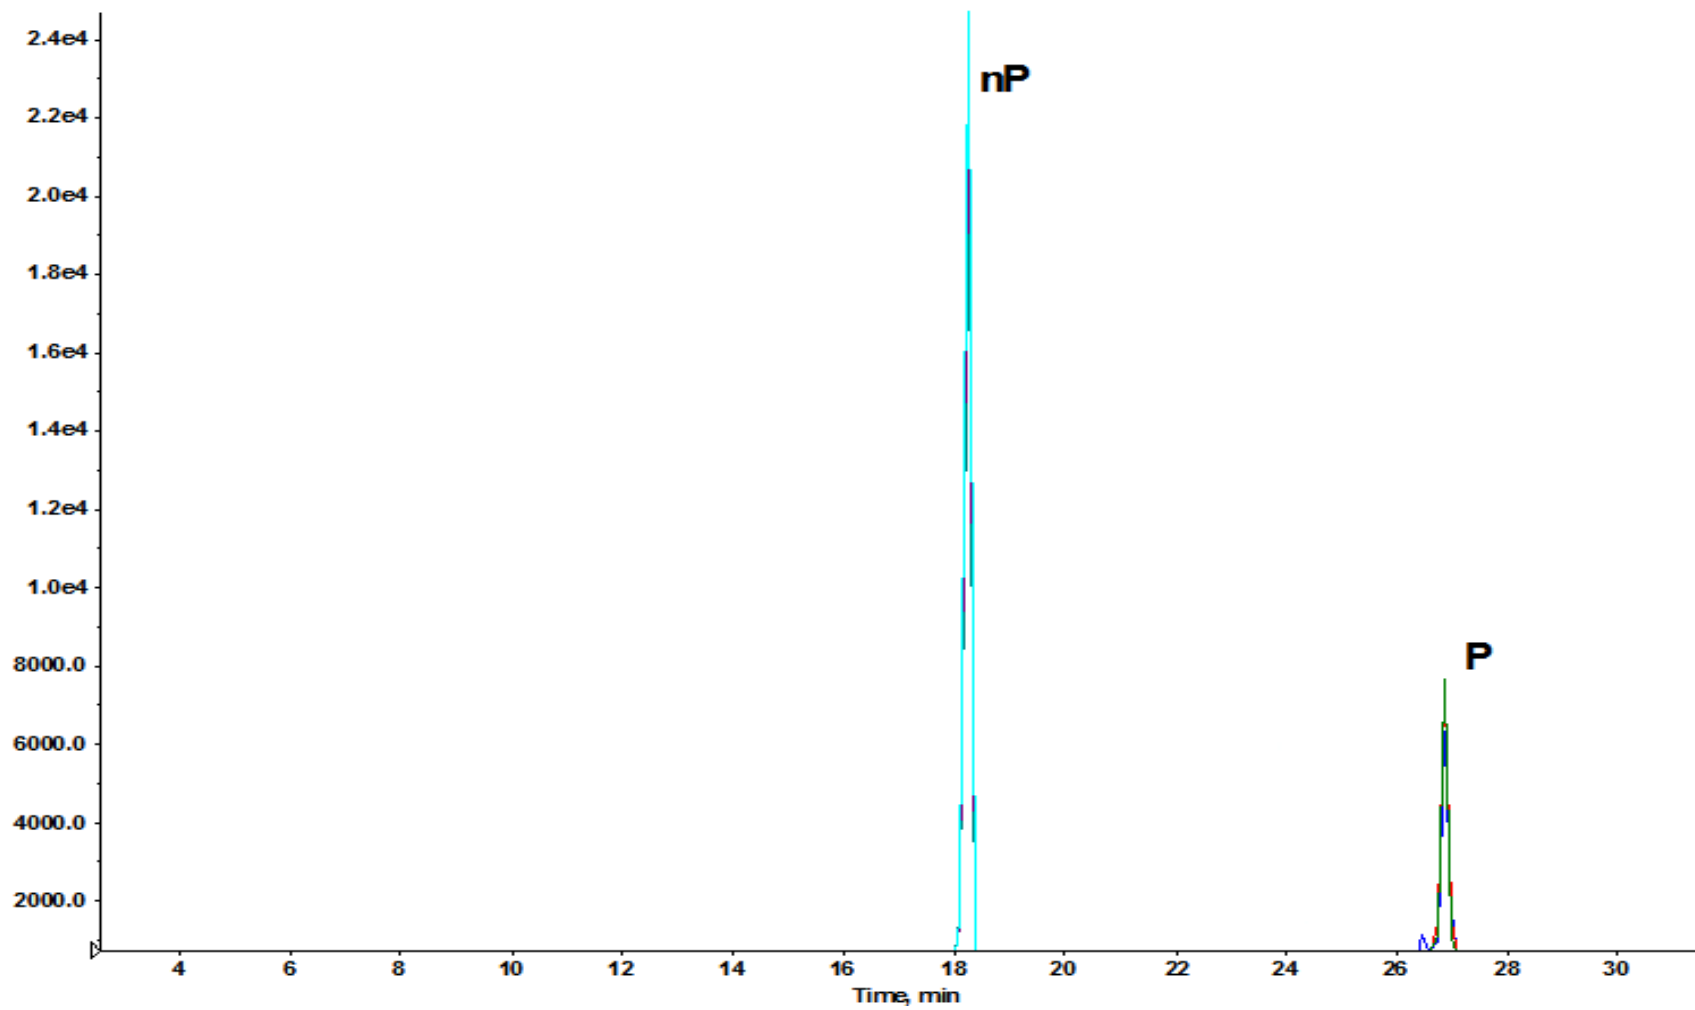

Name: SACE\_5483

LVNSGISLGAIR  
LVNSGIS[Pho]LGAIR

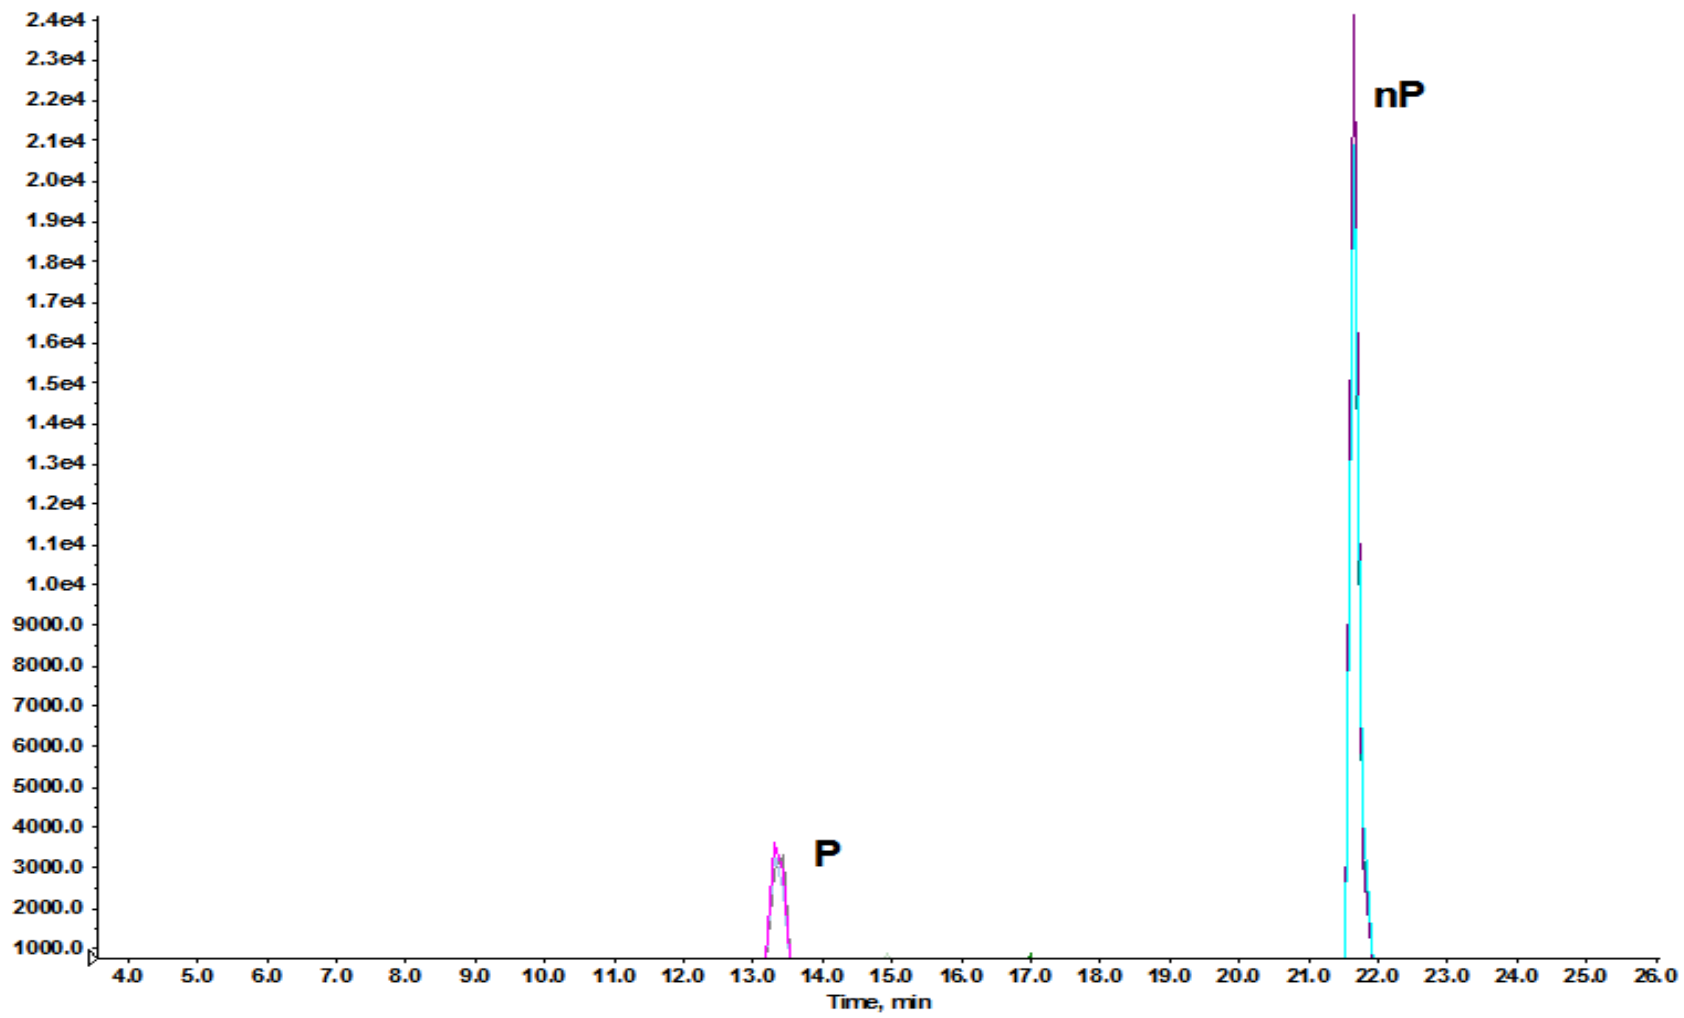

SIEVSLDVPHGR  
SIEVS[Pho]LDVPHGR

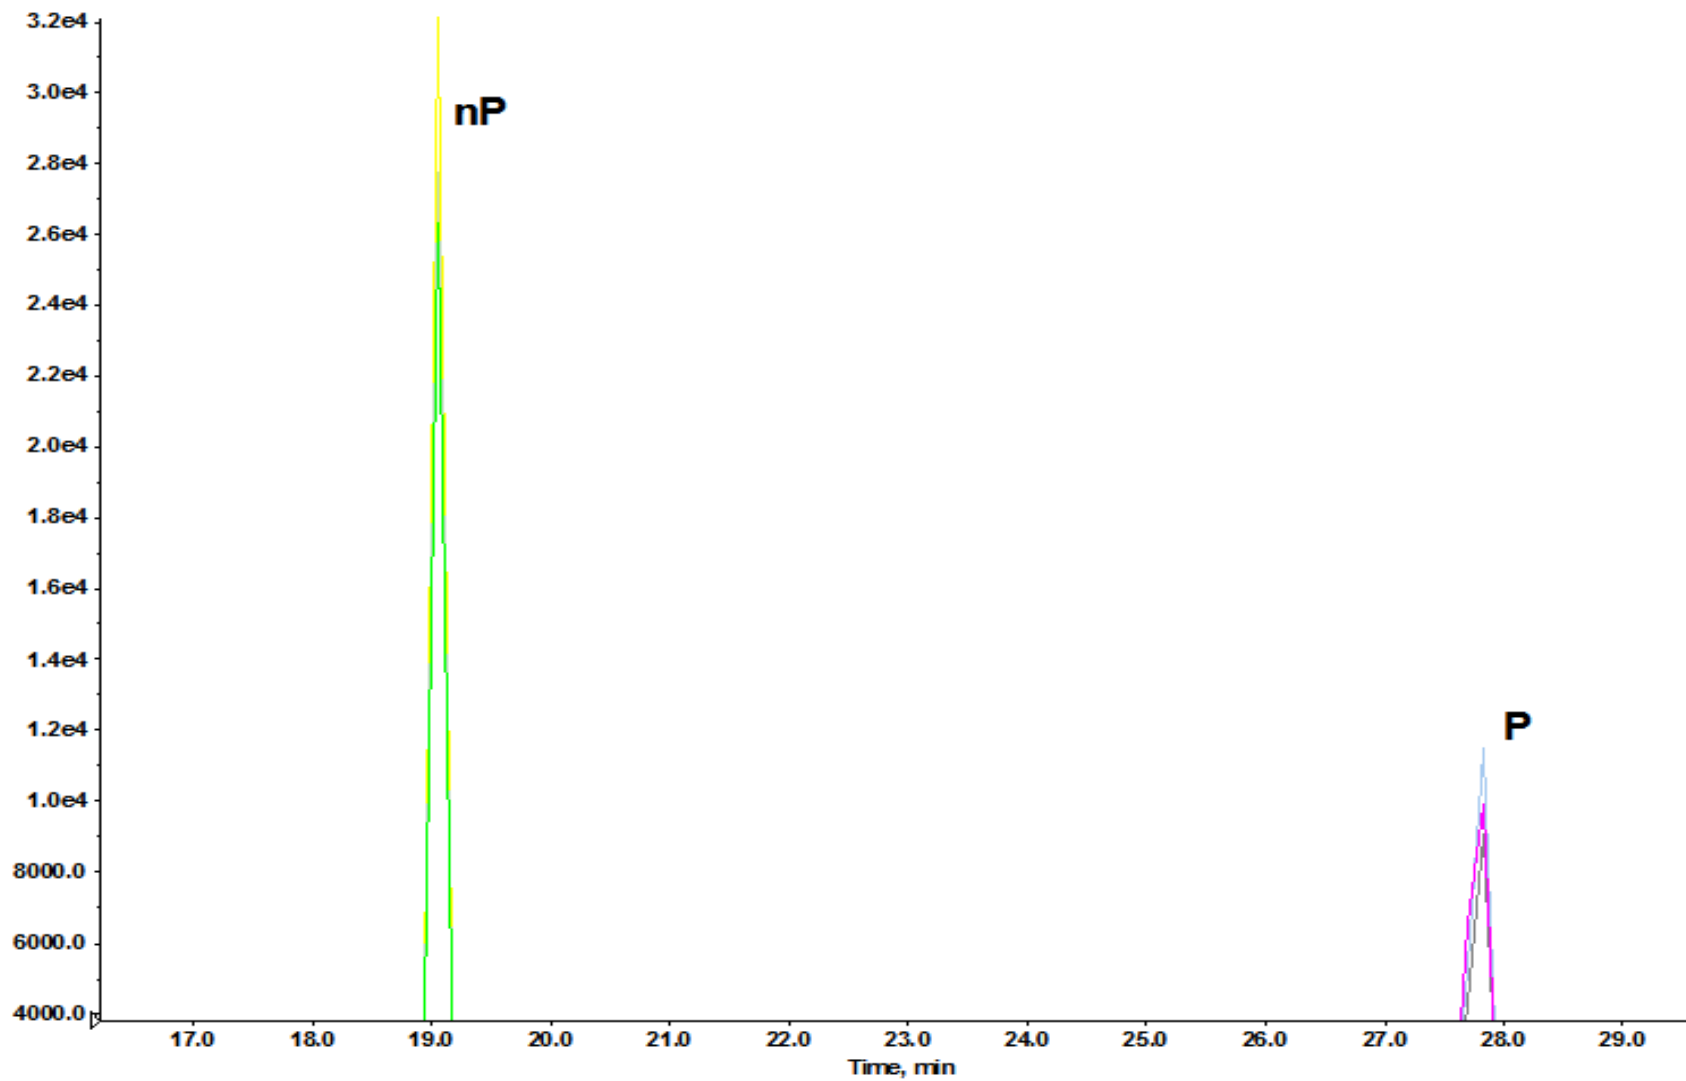

EAARFETQAAAK  
EAARFET[Pho]QAAAK

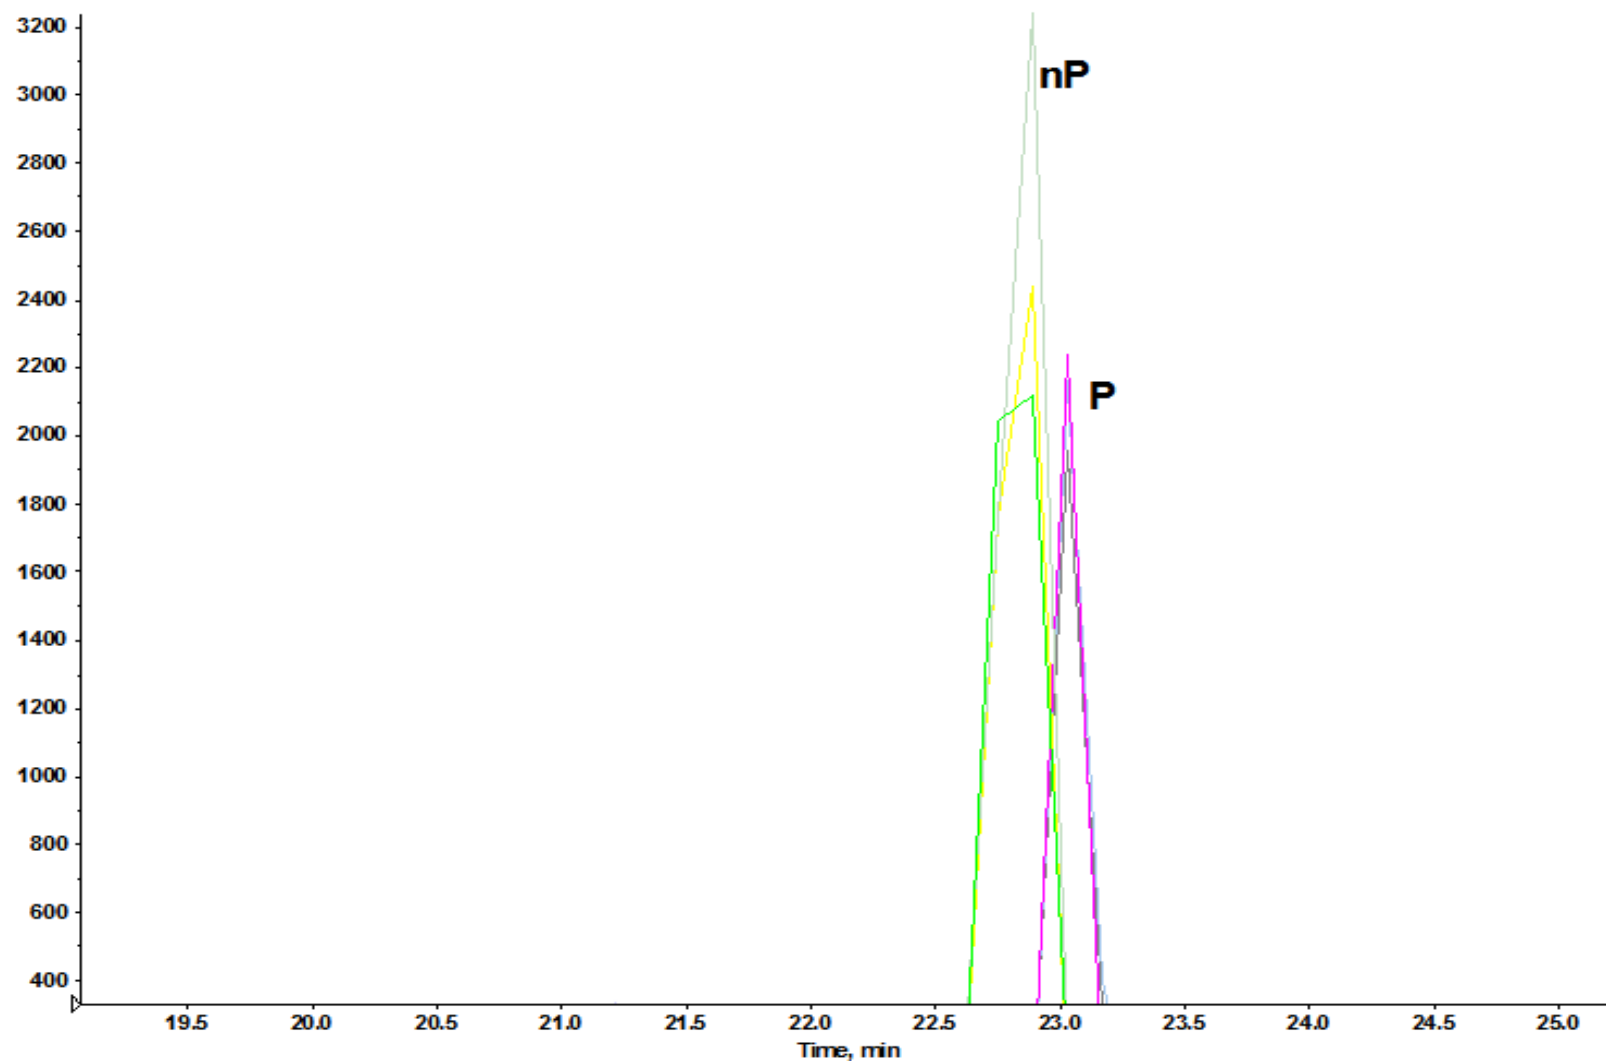

Name: SACE\_6241

DAAVSQANDLSKQLESARSEIENLR  
DAAVSQANDLSKQLESARS[Pho]EIENLR

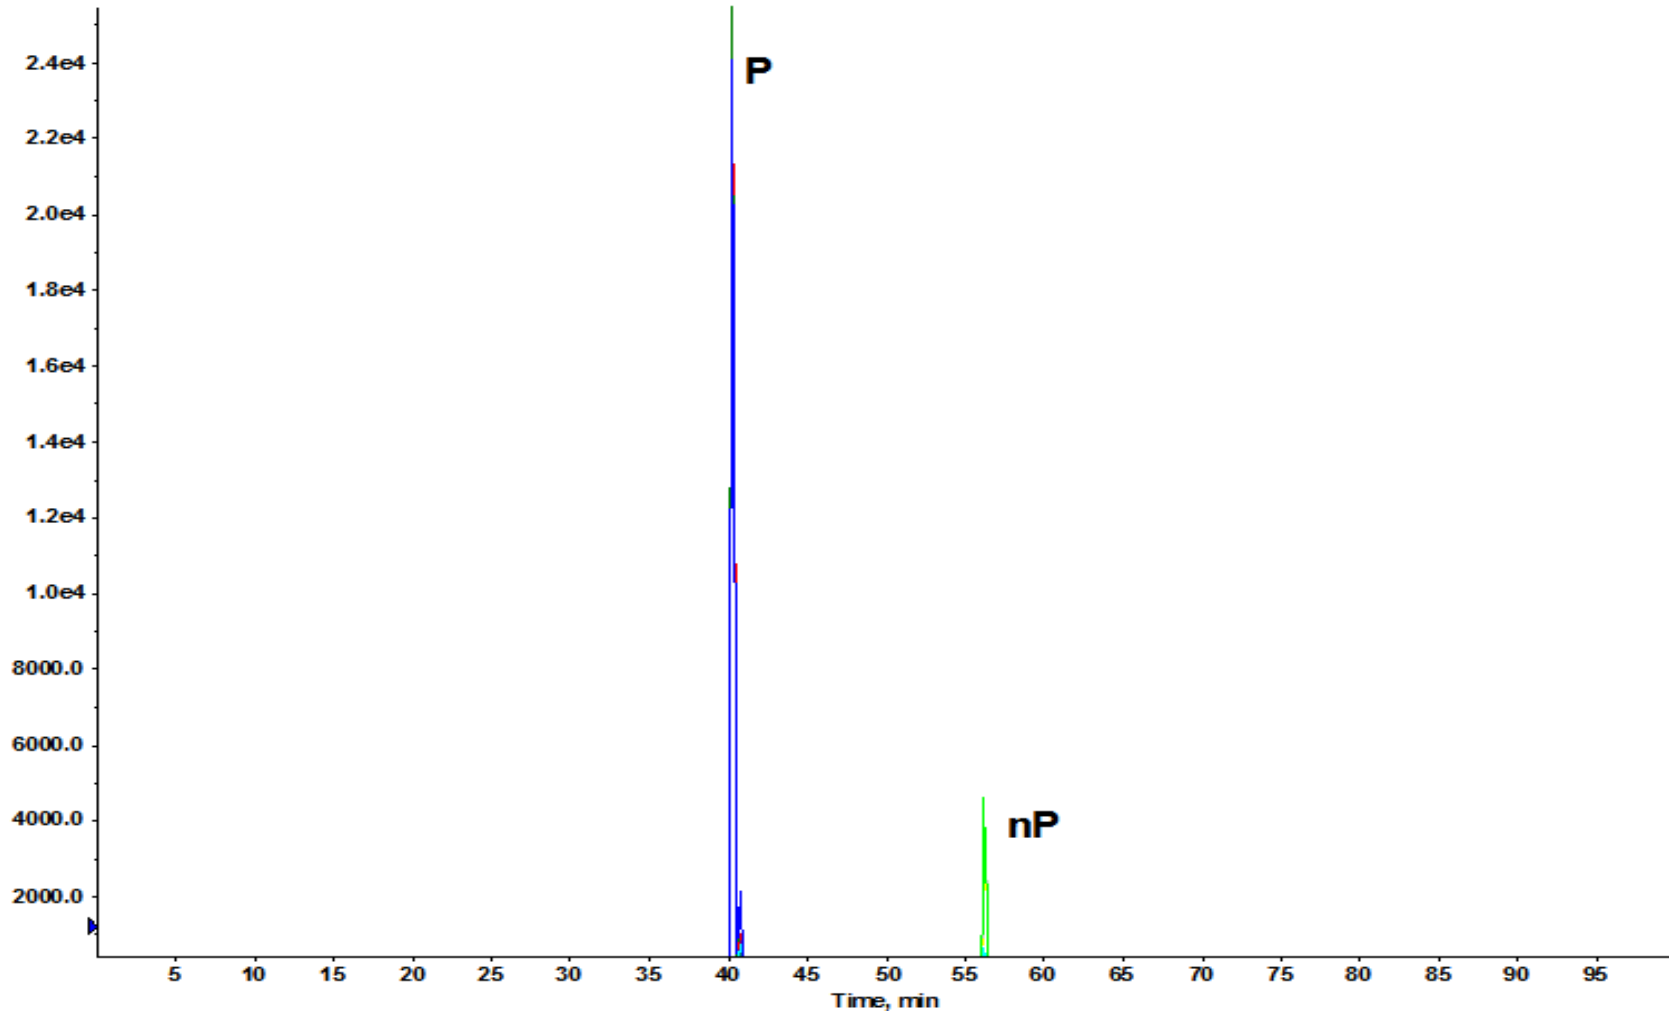



Name: SACE\_6324

AGVTLNVKLGNKDTYWSDISK  
AGVTLNVKLGNKDTYWS[Pho]DISK

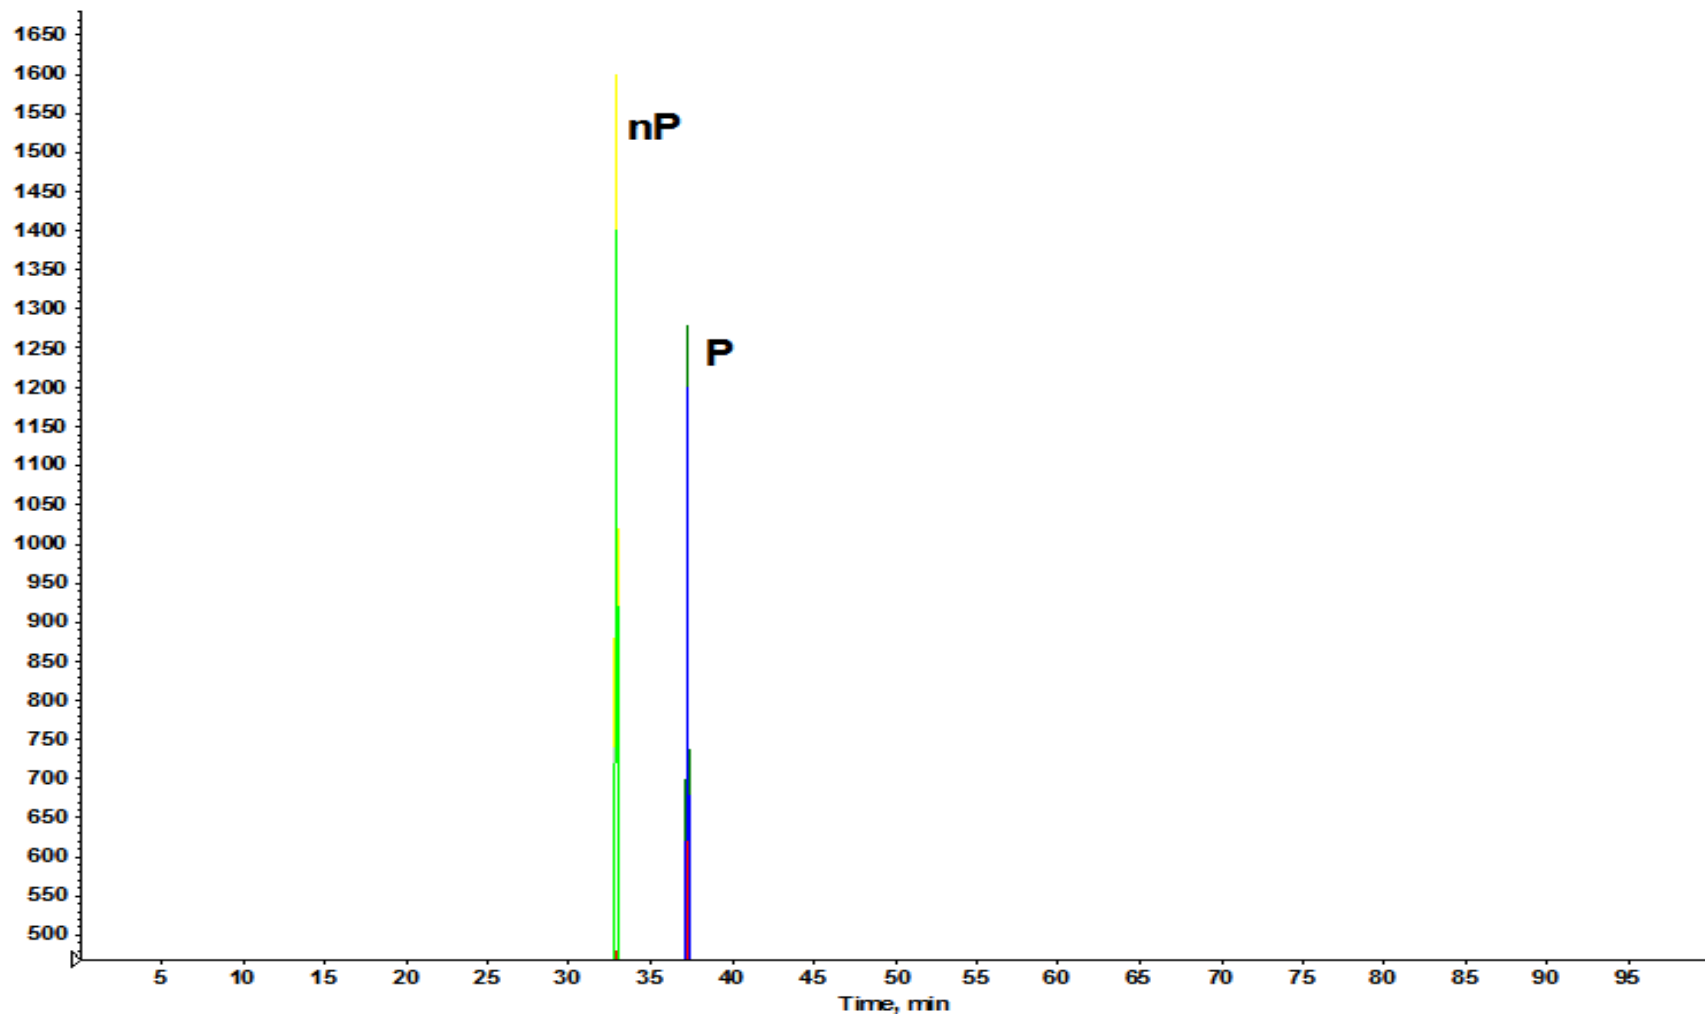

Name: SACE\_6155

SGHIGGAGIDVYKTEPTTSSPLF  
S[Pho]GHIGGAGIDVYKTEPTTSSPLF

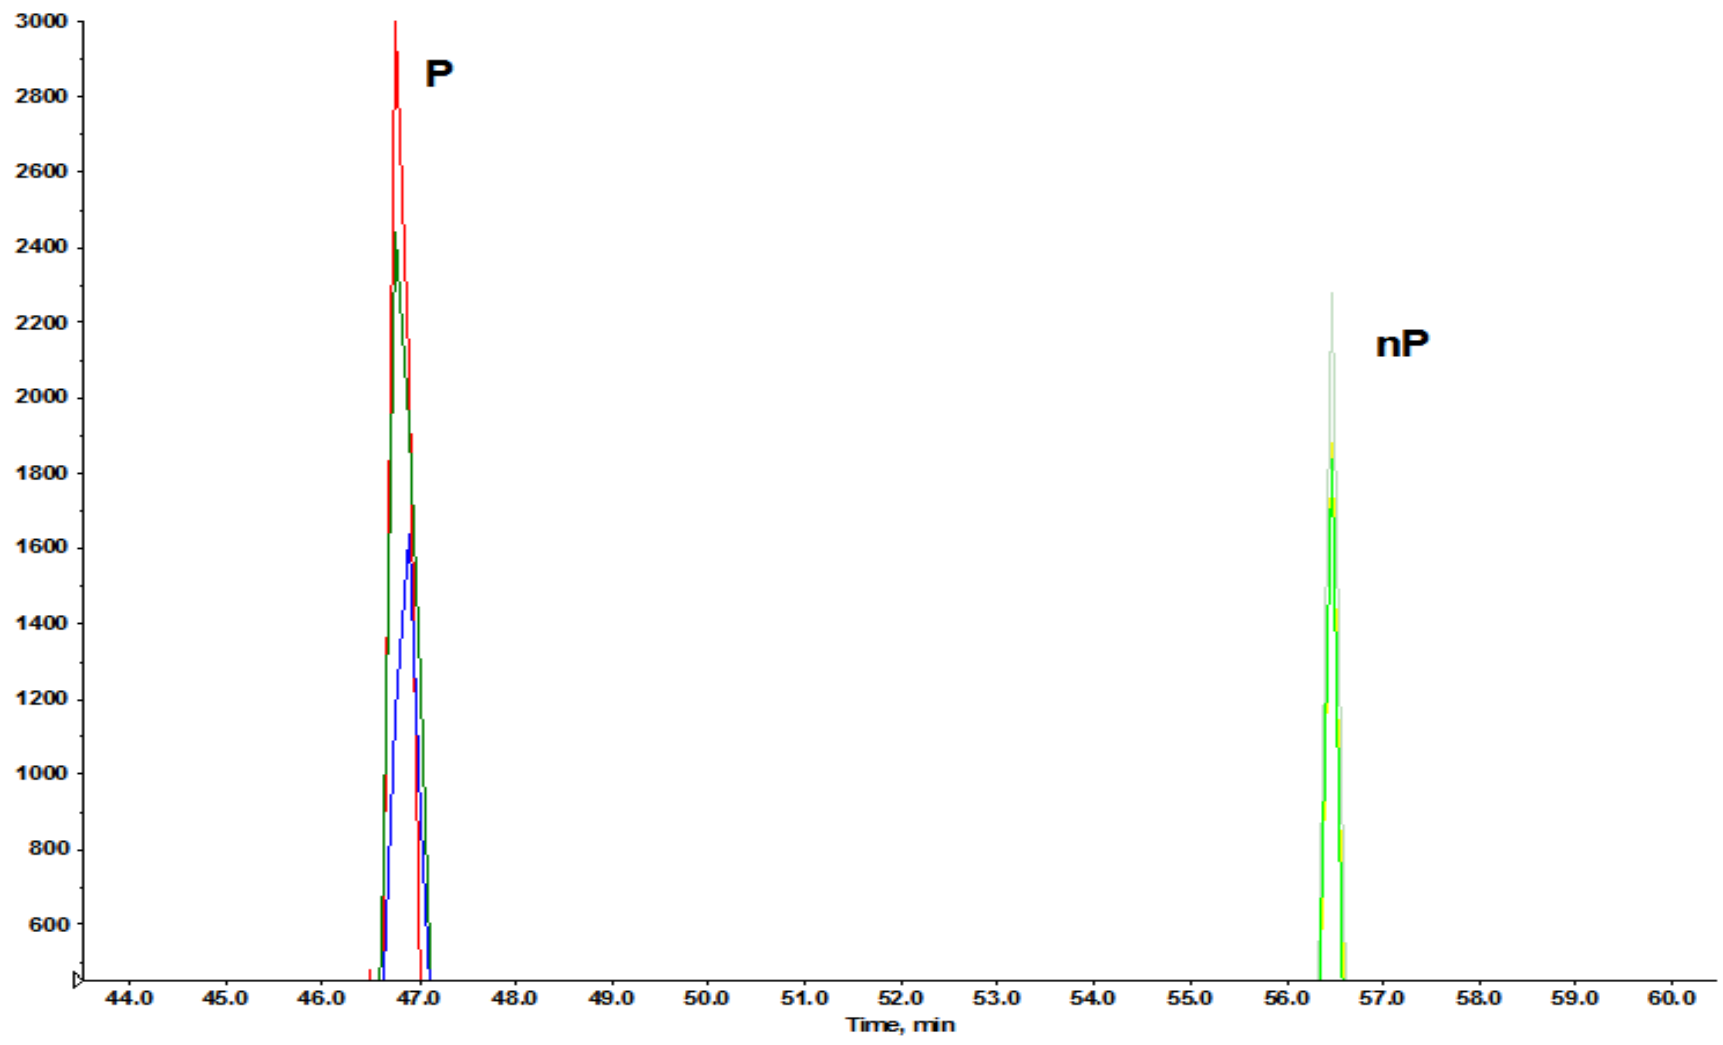

Name: SACE\_5364

QYVLPELDYDYAALEPAISGEINELHHSK  
QY[Pho]VLPELDYDYAALEPAISGEINELHHSK

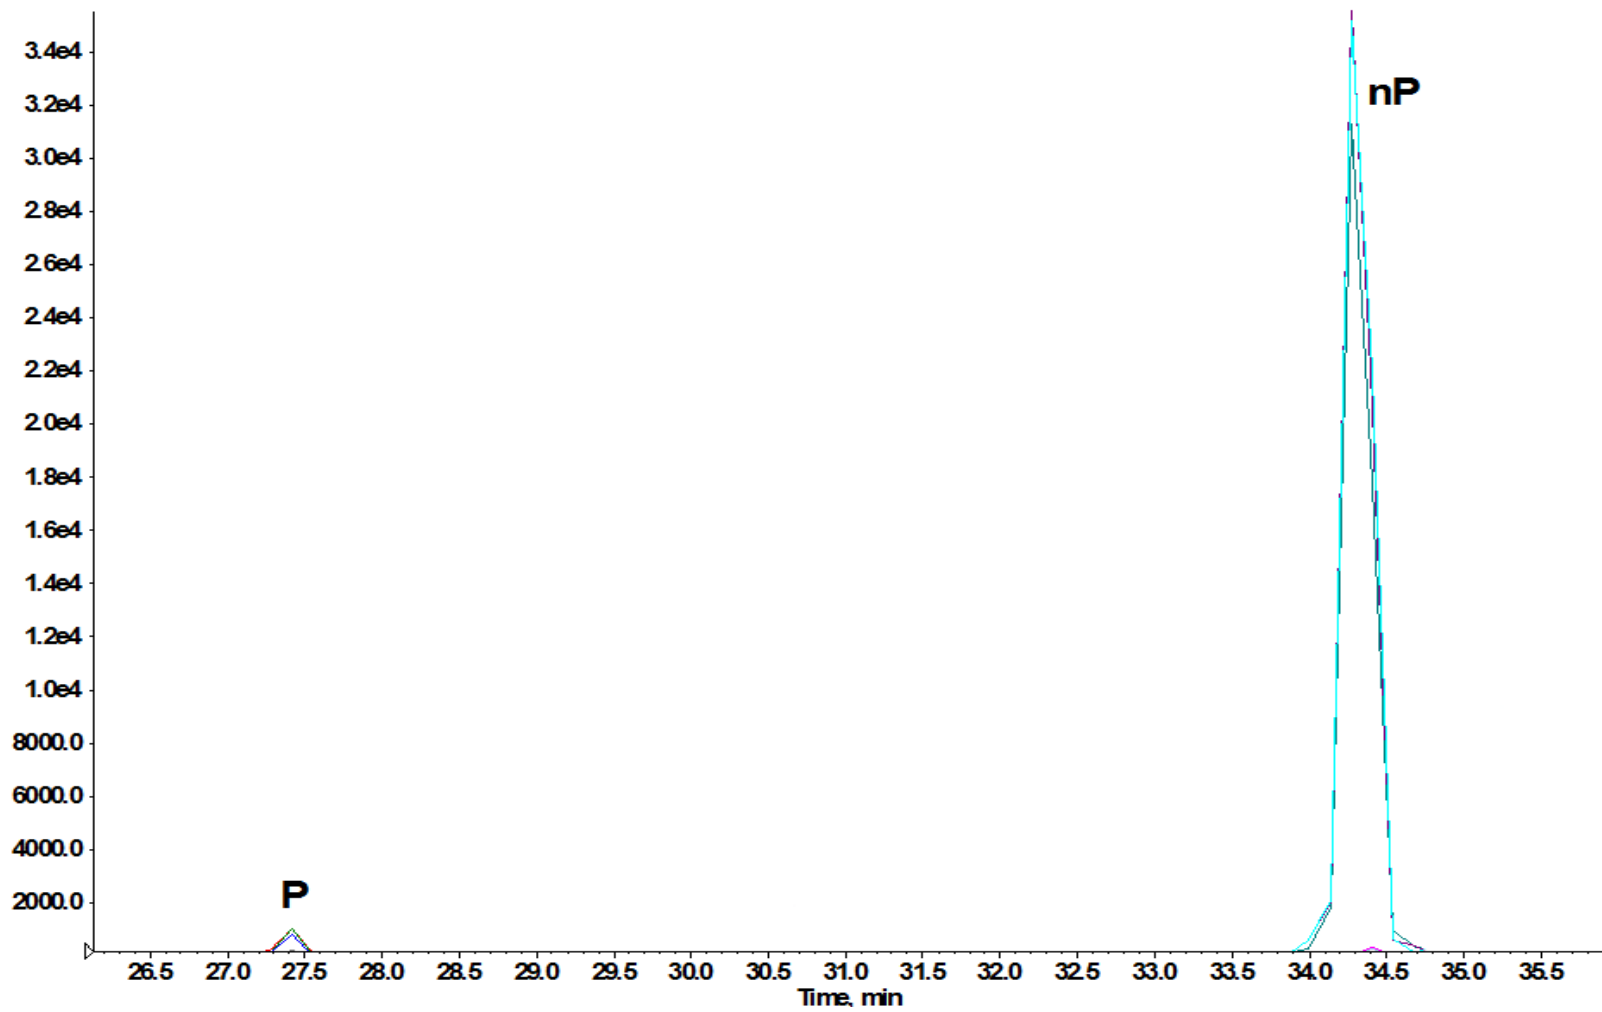

Name: SACE\_2160

ALLDRLSKR  
ALLDRLS[Pho]KR

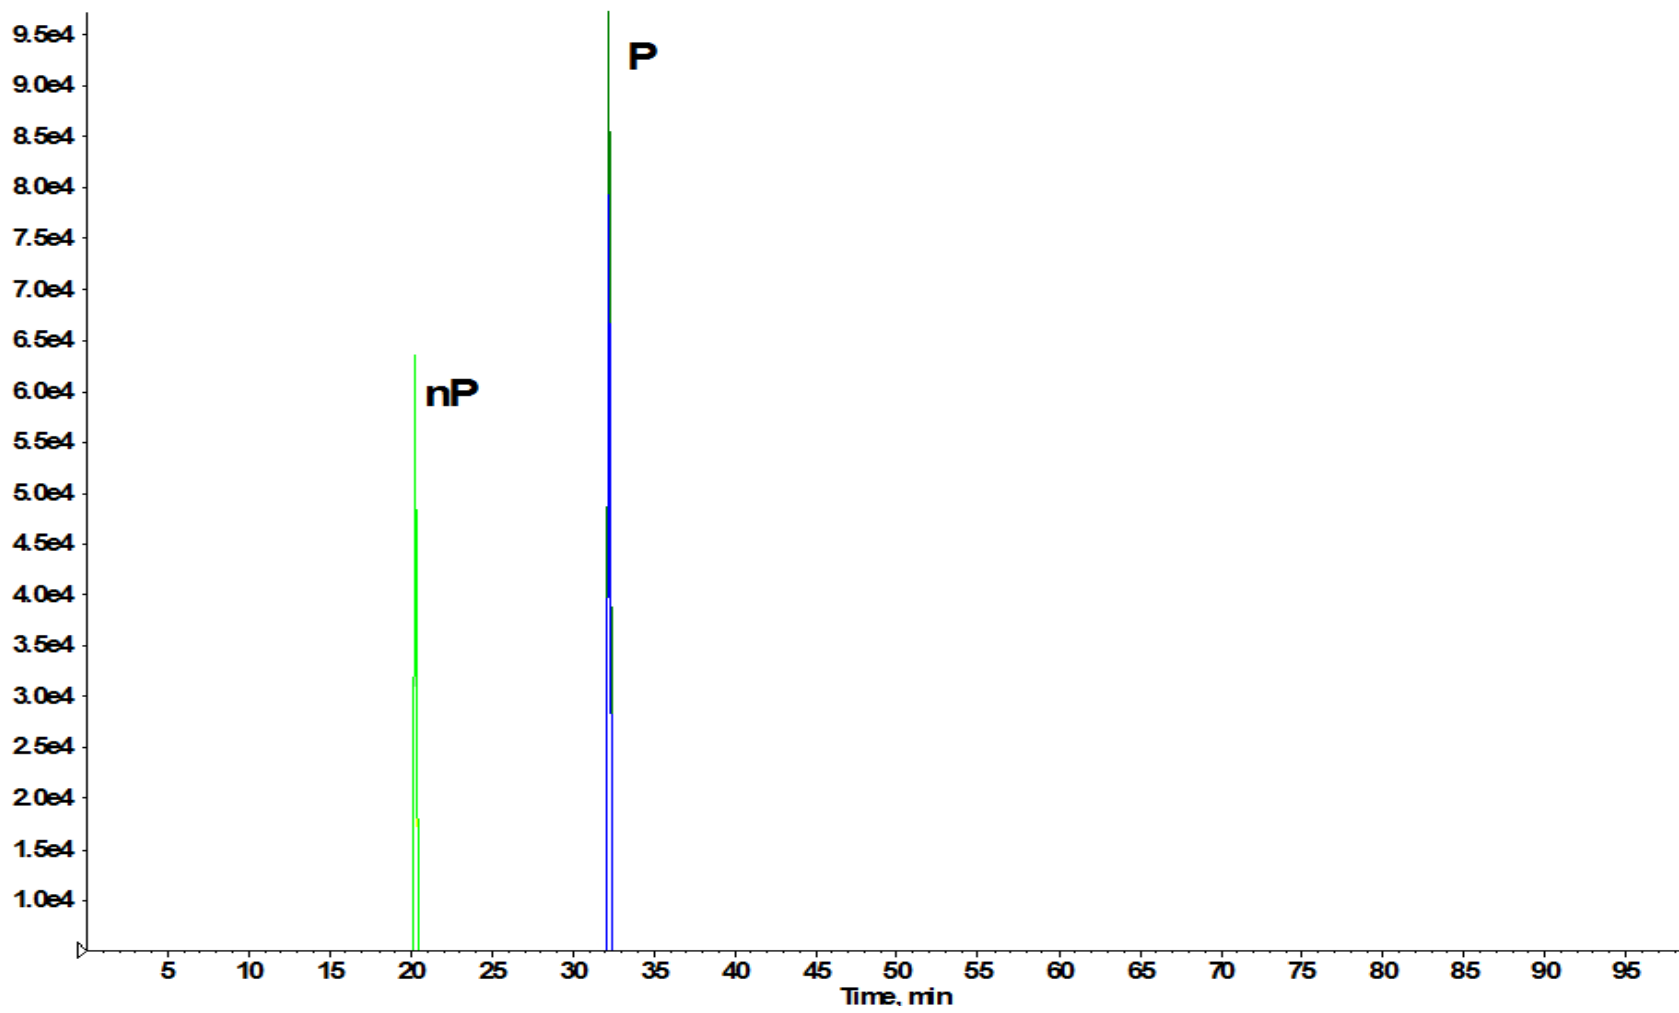

Name: SACE\_7385

NTVTVDTSFK

NT[Pho]VTVD[Pho]DSFK

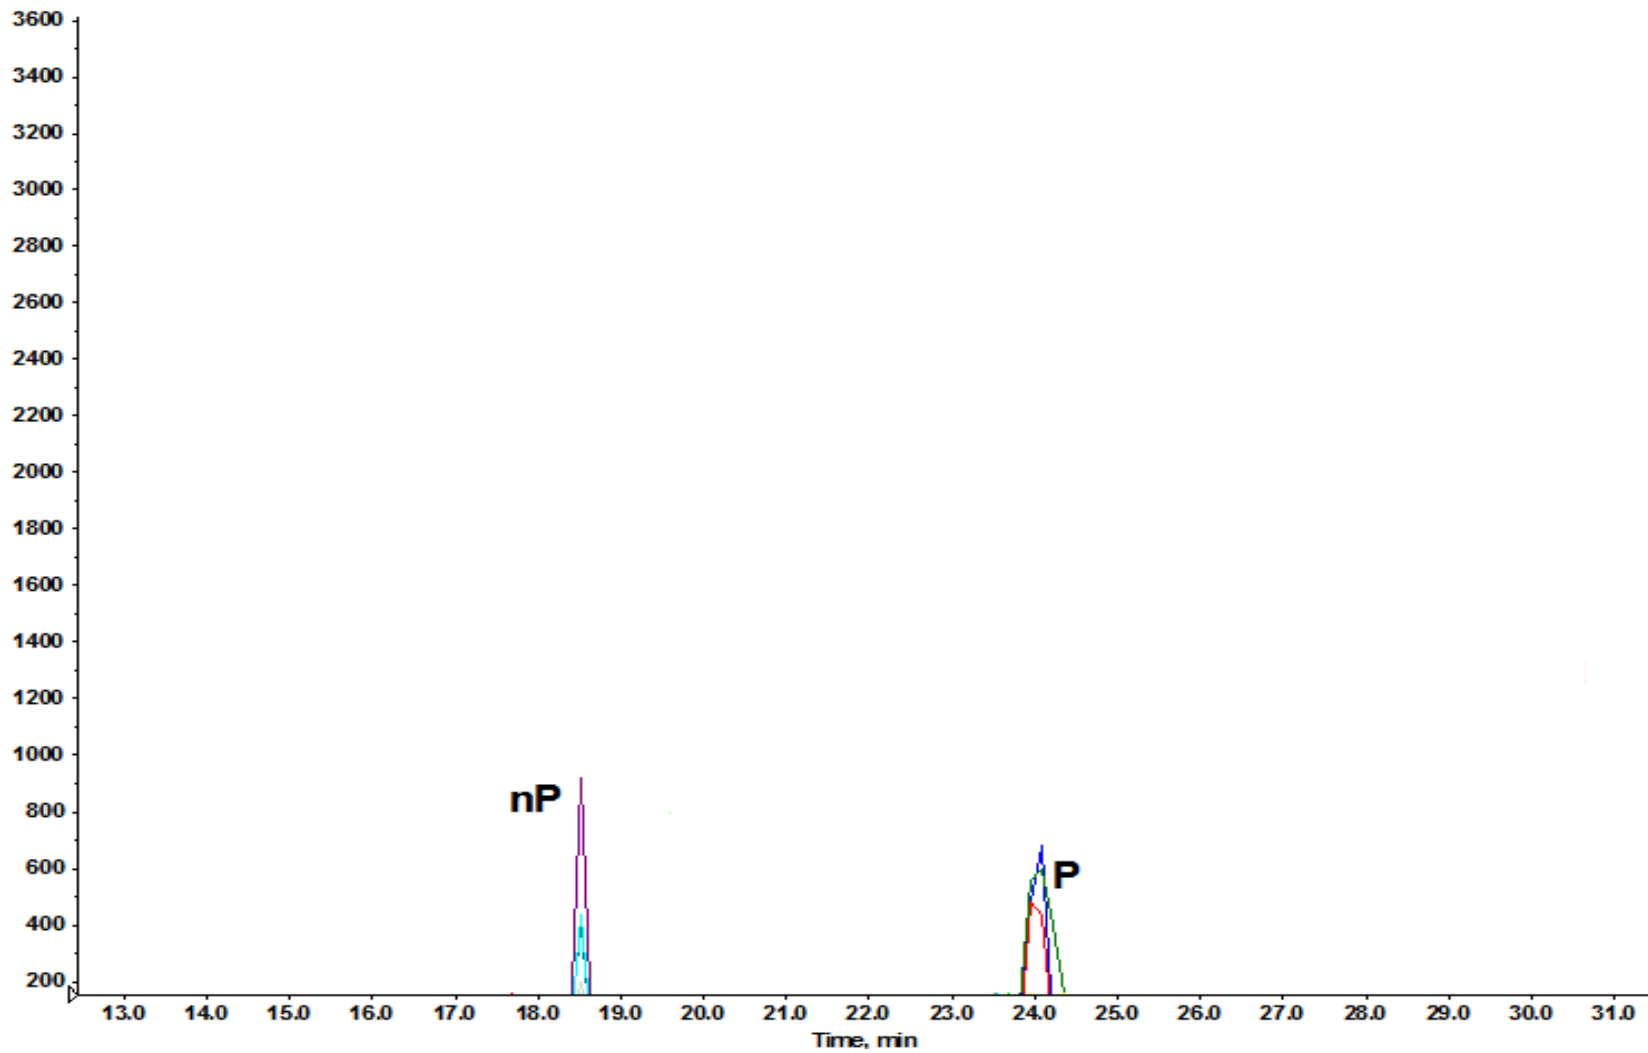

Supplement: supp_M113.033951_mcp.M113.033951-4.pdf [file supp_M113.033951_mcp.M113.033951-4.pdf]
